# Supplementary material for: Nanopore Assay Reveals Cell-type-dependent Gene Expression of Indiana Vesiculovirus and Differential Host Cell Response
Source: Preprints.org preprint supplement (doi:10.20944/preprints202108.0195.v1), 2021-08-09
Supplement: Supplementary file 1 [file supplementary]

## Sheet: LoRTIA_Transcripts
Cell_type	Start	Stop	Strand	Count	Transcript_name	hpi_1	hpi_6	hpi_15	hpi_24	dCDNA_mix	source	category	Gene
Glial cells	51	1381	+	6781	N.prev	0	133	2583	4065	2436	Canonical_transcripts	canonic	N
Fibroblast cells	51	1381	+	307	N.prev	91	71	33	112	542	Canonical_transcripts	canonic	N
Glial cells	51	2204	+	24	N-NS	0	0	5	19	6	Both_cell_type	polycistronic	N
Fibroblast cells	51	2204	+	4	N-NS	0	2	0	2	0	Both_cell_type	polycistronic	N
Glial cells	51	3044	+	3	N-NS-M	0	0	1	2	0	Glia_only	polycistronic	N
Glial cells	51	4718	+	1	N-NS-M-G	0	0	0	1	0	Glia_only	polycistronic	N
Glial cells	159	1381	+	29	N.2-Long-2	0	1	7	21	10	Both_cell_type	embedded	N
Fibroblast cells	159	1381	+	6	N.2-Long-2	0	1	2	3	14	Both_cell_type	embedded	N
Glial cells	271	1381	+	60	N.2-Long-1	0	1	28	31	32	Both_cell_type	embedded	N
Fibroblast cells	271	1381	+	14	N.2-Long-1	2	4	2	6	28	Both_cell_type	embedded	N
Glial cells	349	1381	+	152	N.2	0	3	41	108	8	Both_cell_type	embedded	N
Fibroblast cells	349	1381	+	30	N.2	2	4	16	8	13	Both_cell_type	embedded	N
Glial cells	1386	2204	+	15685	NS.prev	1	376	6925	8383	2183	Canonical_transcripts	canonic	NS
Fibroblast cells	1386	2204	+	688	NS.prev	178	155	60	295	578	Canonical_transcripts	canonic	NS
Glial cells	1386	3044	+	164	NS-M	0	7	62	95	29	Both_cell_type	polycistronic	NS
Fibroblast cells	1386	3044	+	8	NS-M	3	3	1	1	11	Both_cell_type	polycistronic	NS
Glial cells	1386	4718	+	5	NS-M-G	0	0	1	4	0	Glia_only	polycistronic	NS
Glial cells	1446	2204	+	97	NS.2-Long-1	0	5	26	66	7	Both_cell_type	embedded	NS
Fibroblast cells	1446	2204	+	39	NS.2-Long-1	3	20	3	13	10	Both_cell_type	embedded	NS
Fibroblast cells	1446	3044	+	3	M-Long-1	0	2	1	0	1	Fibroblast_only	alt.TSS.Long	M
Glial cells	1564	2204	+	33	NS.2	0	1	9	23	2	Both_cell_type	embedded	NS
Fibroblast cells	1564	2204	+	19	NS.2	1	9	4	5	6	Both_cell_type	embedded	NS
Glial cells	2209	3044	+	1429	M.prev	0	50	723	656	952	Canonical_transcripts	canonic	M
Fibroblast cells	2209	3044	+	89	M.prev	32	18	15	24	160	Canonical_transcripts	canonic	M
Glial cells	2209	4718	+	6	M-G	0	0	1	5	2	Both_cell_type	polycistronic	M
Fibroblast cells	2209	4718	+	2	M-G	0	1	0	1	0	Both_cell_type	polycistronic	M
Glial cells	2388	3044	+	25	M.3	0	2	6	17	4	Both_cell_type	embedded	M
Fibroblast cells	2388	3044	+	7	M.3	1	1	4	1	2	Both_cell_type	embedded	M
Glial cells	2521	3044	+	60	M.5	0	2	14	44	8	Both_cell_type	embedded	M
Fibroblast cells	2521	3044	+	14	M.5	0	5	4	5	2	Both_cell_type	embedded	M
Glial cells	2538	3044	+	72	M.6	0	4	24	44	11	Both_cell_type	embedded	M
Fibroblast cells	2538	3044	+	17	M.6	1	6	2	8	7	Both_cell_type	embedded	M
Glial cells	3049	4718	+	7826	G.prev	0	343	3659	3824	538	Canonical_transcripts	canonic	G
Fibroblast cells	3049	4718	+	1010	G.prev	186	176	53	595	392	Canonical_transcripts	canonic	G
Glial cells	4723	11099	+	1	L.prev	0	1	1	1	1	Canonical_transcripts	canonic	L
Fibroblast cells	4723	11099	+	1	L.prev	1	1	1	1	1	Canonical_transcripts	canonic	L
Glial cells	3316	4718	+	13	G.5	0	1	5	7	4	Both_cell_type	embedded	G
Fibroblast cells	3316	4718	+	16	G.5	0	6	4	6	5	Both_cell_type	embedded	G

## Sheet: DEGs_glia_vs_fibroblast
Gene	p	padj	loglik_full	loglik_red	df_full	df_red	mean	converge_combined	converge_case	converge_control	converge_sigmoid	impulseTOsigmoid_p	impulseTOsigmoid_padj	sigmoidTOconst_p	sigmoidTOconst_padj	isTransient	isMonotonous	allZero
AAMDC	1.49254e-34	6.86566e-33	-39.3151	-125.444	13	7	17.5857	0	0	0	0	0.939573	1	0.0170587	0.0801222	FALSE	FALSE	FALSE
AAR2	0.000106731	0.000490457	-23.0286	-36.8816	13	7	2.37414	0	0	0	0	0.780705	1	0.877551	1	FALSE	FALSE	FALSE
AATF	2.86863e-08	2.24812e-07	-41.6398	-64.6742	13	7	19.031	0	0	0	0	0.895742	1	0.902426	1	FALSE	FALSE	FALSE
ABCB1	4.28498e-44	2.85367e-42	-29.6168	-138.175	13	7	18.0489	0	0	0	0	0.580137	1	0.523584	0.81091	FALSE	FALSE	FALSE
ABCB10	0.000916473	0.00339643	-27.2879	-38.6209	13	7	3.37324	0	0	0	0	0.511928	1	0.955881	1	FALSE	FALSE	FALSE
ABCC4	4.81504e-05	0.000232512	-40.9731	-55.7411	13	7	11.7944	0	0	0	0	0.208813	1	0.727415	0.952986	FALSE	FALSE	FALSE
ABLIM3	0.00249324	0.00830213	-24.6413	-34.7693	13	7	2.6577	0	0	0	0	0.445828	1	0.771806	0.977991	FALSE	FALSE	FALSE
ABRAXAS1	2.63276e-94	8.39097e-92	-35.7513	-261.38	13	7	36.8502	0	0	0	0	0.66015	1	0.176285	0.413556	FALSE	FALSE	FALSE
ACADM	3.573e-26	1.08454e-24	-69.9443	-136.264	13	7	119.667	0	0	0	0	0.875951	1	0.321561	0.611046	FALSE	FALSE	FALSE
ACADVL	6.81893e-05	0.000320612	-51.4709	-65.8399	13	7	23.1404	0	0	0	0	0.999999	1	0.0106771	0.0560485	FALSE	FALSE	FALSE
ACAT1	2.1251e-19	4.27125e-18	-84.158	-134.331	13	7	282.859	0	0	0	0	0.716247	1	0.00312304	0.0209234	FALSE	FALSE	FALSE
ACE	2.47129e-09	2.18011e-08	-23.2488	-48.9446	13	7	4.75684	0	0	0	0	0.999985	1	0.359761	0.656546	FALSE	FALSE	FALSE
ACLY	0.000435851	0.00174751	-30.9014	-43.1146	13	7	5.20283	0	0	0	0	0.240975	1	0.282921	0.566604	FALSE	FALSE	FALSE
ACO2	1.76459e-05	9.10243e-05	-45.7213	-61.6326	13	7	19.1757	0	0	0	0	0.794702	1	0.999666	1	FALSE	FALSE	FALSE
ACOT8	0.000145196	0.000643363	-22.1411	-35.638	13	7	3.70805	0	0	0	0	0.574506	1	0.0135963	0.0682415	FALSE	FALSE	FALSE
ACTA1	9.78398e-12	1.10243e-10	-23.7464	-55.3748	13	7	5.02919	0	0	0	0	0.582513	1	0.53423	0.818581	FALSE	FALSE	FALSE
ACTG2	1.79276e-09	1.62258e-08	-26.1824	-52.2249	13	7	5.13556	0	0	0	0	0.896943	1	0.696917	0.934669	FALSE	FALSE	FALSE
ACTN1	9.40673e-08	6.62032e-07	-52.5001	-74.236	13	7	40.8076	0	0	0	0	0.281663	1	0.000641611	0.0055482	FALSE	FALSE	FALSE
ACTN4	0.000380419	0.00154734	-41.5463	-53.9195	13	7	16.1088	0	0	0	0	0.0355674	1	0.00748605	0.0425513	FALSE	FALSE	FALSE
ACVR2A	0.00106986	0.00388264	-28.9041	-40.0523	13	7	3.35856	0	0	0	0	0.947902	1	0.702378	0.938888	FALSE	FALSE	FALSE
ACSL3	2.34897e-29	8.1249e-28	-49.7792	-123.638	13	7	37.1121	0	0	0	0	0.478729	1	4.29437e-37	5.80651e-35	FALSE	TRUE	FALSE
ACSL5	7.82943e-24	2.13018e-22	-36.88	-97.6377	13	7	16.059	0	0	0	0	0.462021	1	0.992767	1	FALSE	FALSE	FALSE
ADAMTS1	1.12029e-11	1.25282e-10	-35.2815	-66.7656	13	7	10.0505	0	0	0	0	0.400965	1	0.981188	1	FALSE	FALSE	FALSE
ADCK1	1.9979e-05	0.000102232	-19.9141	-35.6845	13	7	1.93327	0	0	0	0	0.797988	1	0.779512	0.98001	FALSE	FALSE	FALSE
ADGRG1	0.000923824	0.003418	-20.3138	-31.6372	13	7	2.13446	0	0	0	0	1	1	1	1	FALSE	FALSE	FALSE
ADGRG6	1.08971e-07	7.63308e-07	-21.4229	-42.9976	13	7	3.22996	0	0	0	0	1	1	1	1	FALSE	FALSE	FALSE
ADGRL2	6.04823e-10	5.74195e-09	-28.5525	-55.7664	13	7	6.19324	0	0	0	0	0.999933	1	0.574366	0.847262	FALSE	FALSE	FALSE
ADH5	6.41289e-10	6.04023e-09	-53.6324	-80.7832	13	7	29.9034	0	0	0	0	0.524478	1	0.00338655	0.0224195	FALSE	FALSE	FALSE
ADI1	2.24089e-06	1.32085e-05	-27.1948	-45.4261	13	7	4.59454	0	0	0	0	0.983655	1	0.0260314	0.109358	FALSE	FALSE	FALSE
ADM	2.63754e-09	2.32124e-08	-17.2248	-42.8502	13	7	3.20118	0	0	0	0	0.976245	1	0.0159121	0.0761801	FALSE	FALSE	FALSE
ADRA1A	2.11566e-10	2.12136e-09	-17.3547	-45.6972	13	7	3.07719	0	0	0	0	0.613673	1	0.72754	0.952986	FALSE	FALSE	FALSE
AFAP1	5.20594e-19	1.0233e-17	-17.4463	-66.6865	13	7	5.5261	0	0	0	0	0.507359	1	4.63844e-30	4.81319e-28	FALSE	TRUE	FALSE
AGBL2	1.64031e-05	8.50065e-05	-19.1795	-35.1736	13	7	2.58548	0	0	0	0	0.576686	1	0.271332	0.55056	FALSE	FALSE	FALSE
AGK	2.0495e-82	4.15676e-80	-41.2978	-239.286	13	7	40.3873	0	0	0	0	1	1	9.36884e-13	3.02926e-11	FALSE	TRUE	FALSE
AGL	1.99936e-30	7.4343e-29	-36.9586	-113.348	13	7	15.6907	0	0	0	0	1	1	7.24156e-36	9.50348e-34	FALSE	TRUE	FALSE
AHCTF1	7.72653e-06	4.18904e-05	-51.3567	-68.2009	13	7	24.9861	0	0	0	0	0.495628	1	0.980405	1	FALSE	FALSE	FALSE
AHCY	3.20405e-05	0.000157798	-43.8583	-59.0916	13	7	14.0675	0	0	0	0	1	1	0.182261	0.422252	FALSE	FALSE	FALSE
AHCYL1	0.000590664	0.00228185	-24.8756	-36.7301	13	7	2.37665	0	0	0	0	0.958646	1	0.607472	0.874589	FALSE	FALSE	FALSE
AIFM1	0.000350358	0.00143553	-35.3335	-47.8033	13	7	10.3389	0	0	0	0	0.591279	1	0.0433394	0.157348	FALSE	FALSE	FALSE
AIMP2	1.30228e-17	2.33364e-16	-43.141	-89.0234	13	7	24.9501	0	0	0	0	0.246496	1	4.57413e-07	8.00383e-06	FALSE	TRUE	FALSE
AKAP12	2.22357e-09	1.97641e-08	-28.764	-54.5739	13	7	5.71182	0	0	0	0	0.999879	1	0.899465	1	FALSE	FALSE	FALSE
AKAP13	3.99151e-05	0.00019401	-36.0348	-51.0173	13	7	7.73562	0	0	0	0	0.622445	1	0.61139	0.878307	FALSE	FALSE	FALSE
AKAP8L	0.000533694	0.00209625	-26.2158	-38.1902	13	7	5.08962	0	0	0	0	0.155692	1	0.00982136	0.0530544	FALSE	FALSE	FALSE
AKAP9	2.61974e-08	2.06524e-07	-64.1376	-87.2709	13	7	80.367	0	0	0	0	0.990518	1	0.140762	0.35805	FALSE	FALSE	FALSE
AKIRIN2	5.06851e-06	2.83761e-05	-53.2082	-70.5263	13	7	43.0046	0	0	0	0	0.0425835	1	9.28265e-06	0.000130249	FALSE	TRUE	FALSE
AKR1B1	2.13512e-35	1.03553e-33	-75.4087	-163.528	13	7	204.655	0	0	0	0	0.52525	1	0.0229455	0.0998857	FALSE	FALSE	FALSE
AKR7L	2.44662e-07	1.62211e-06	-21.5829	-42.2686	13	7	3.31644	0	0	0	0	0.999934	1	0.651333	0.906864	FALSE	FALSE	FALSE
ALDH1A1	2.62003e-22	6.49477e-21	-31.7659	-88.892	13	7	12.6668	0	0	0	0	1	1	0.0481507	0.169841	FALSE	FALSE	FALSE
ALDH3A1	2.48067e-50	2.17034e-48	-37.4663	-160.637	13	7	31.8727	0	0	0	0	1	1	1.20605e-10	3.34249e-09	FALSE	TRUE	FALSE
ALDH3A2	3.16119e-08	2.45309e-07	-43.2325	-66.1609	13	7	15.1893	0	0	0	0	0.964071	1	4.01739e-05	0.000485788	FALSE	TRUE	FALSE
ALDH7A1	0.000686618	0.00261476	-53.3759	-65.0522	13	7	32.295	0	0	0	0	0.993642	1	3.5436e-06	5.43353e-05	FALSE	TRUE	FALSE
ALG1	0.000300717	0.00124703	-24.6325	-37.2814	13	7	3.38212	0	0	0	0	0.420043	1	0.038568	0.145224	FALSE	FALSE	FALSE
ALG3	0.000314366	0.0013	-38.9645	-51.5614	13	7	15.2297	0	0	0	0	0.798911	1	3.405e-08	7.16657e-07	FALSE	TRUE	FALSE
ALG5	1.75989e-05	9.0887e-05	-34.7167	-50.631	13	7	6.55399	0	0	0	0	0.376521	1	0.985142	1	FALSE	FALSE	FALSE
ALKBH7	4.74237e-12	5.53938e-11	-49.6049	-82.0042	13	7	33.6678	0	0	0	0	1	1	4.09521e-08	8.42066e-07	FALSE	TRUE	FALSE
AMZ2	0.00129538	0.00464254	-33.7879	-44.707	13	7	8.60814	0	0	0	0	0.5696	1	0.000280402	0.00266771	FALSE	FALSE	FALSE
ANKH	0.000556799	0.00216792	-26.5151	-38.4394	13	7	4.03253	0	0	0	0	0.957983	1	0.474276	0.769535	FALSE	FALSE	FALSE
ANKRD11	0.000125197	0.000564844	-51.9881	-65.6567	13	7	21.7782	0	0	0	0	0.976255	1	0.335748	0.628815	FALSE	FALSE	FALSE
ANKRD12	0.00042561	0.00171087	-71.2887	-83.5299	13	7	81.3267	0	0	0	0	0.274184	1	0.868963	1	FALSE	FALSE	FALSE
ANKRD18B	1.06875e-25	3.17919e-24	-34.5569	-99.7471	13	7	15.1633	0	0	0	0	0.999955	1	0.110404	0.305597	FALSE	FALSE	FALSE
ANKRD26	3.1845e-18	5.99547e-17	-57.9836	-105.336	13	7	57.5012	0	0	0	0	0.334507	1	0.776989	0.98001	FALSE	FALSE	FALSE
ANKRD30B	2.08611e-11	2.30401e-10	-25.4312	-56.2525	13	7	5.68168	0	0	0	0	0.75878	1	0.772144	0.977991	FALSE	FALSE	FALSE
ANKRD39	0.00134629	0.00481341	-27.2375	-38.1104	13	7	4.00691	0	0	0	0	0.780305	1	0.387981	0.687246	FALSE	FALSE	FALSE
ANP32E	5.00779e-06	2.80713e-05	-33.0838	-50.4154	13	7	7.37943	0	0	0	0	0.572283	1	0.81191	0.993621	FALSE	FALSE	FALSE
ANXA1	5.90329e-05	0.000281115	-66.0789	-80.6135	13	7	131.492	0	0	0	0	0.382584	1	0.0755448	0.233597	FALSE	FALSE	FALSE
ANXA4	0.000107313	0.000492625	-57.5782	-71.4249	13	7	34.0202	0	0	0	0	0.317906	1	0.0445312	0.160499	FALSE	FALSE	FALSE
ANXA5	1.71281e-07	1.16859e-06	-52.9379	-74.016	13	7	34.2993	0	0	0	0	0.251704	1	0.0192169	0.0872363	FALSE	FALSE	FALSE
ANXA7	0.00213108	0.00722012	-41.2626	-51.5812	13	7	12.7511	0	0	0	0	0.098255	1	0.50629	0.795879	FALSE	FALSE	FALSE
AOPEP	0.000655427	0.00251056	-22.0049	-33.7362	13	7	2.24978	0	0	0	0	0.378611	1	0.540497	0.825588	FALSE	FALSE	FALSE
AOX1	0.00112642	0.0040697	-16.1924	-27.279	13	7	1.50729	0	0	0	0	1	1	1	1	FALSE	FALSE	FALSE
AP1S1	1.69269e-13	2.27494e-12	-42.2116	-78.1447	13	7	20.2436	0	0	0	0	0.394451	1	0.0374877	0.142844	FALSE	FALSE	FALSE
AP2B1	0.00235194	0.00789644	-34.8913	-45.0903	13	7	5.65018	0	0	0	0	0.99543	1	0.267748	0.547476	FALSE	FALSE	FALSE
APBB1	0.00163246	0.00570402	-26.8031	-37.444	13	7	3.57425	0	0	0	0	0.999937	1	0.456888	0.755512	FALSE	FALSE	FALSE
APLP2	8.0162e-08	5.72293e-07	-47.699	-69.6102	13	7	22.7635	0	0	0	0	0.760144	1	0.0328349	0.128856	FALSE	FALSE	FALSE
APOE	1.40537e-55	1.3342e-53	-41.5041	-176.945	13	7	38.1774	0	0	0	0	0.163721	1	0.223195	0.482942	FALSE	FALSE	FALSE
APRT	0.00243337	0.00812702	-43.0625	-53.2201	13	7	16.3555	0	0	0	0	0.614169	1	0.00492132	0.0307118	FALSE	FALSE	FALSE
AREG	5.96345e-05	0.000283073	-26.1899	-40.7128	13	7	3.93577	0	0	0	0	1	1	1	1	FALSE	FALSE	FALSE
ARF5	0.000100971	0.000465906	-43.2275	-57.1445	13	7	15.7508	0	0	0	0	0.463722	1	0.0141303	0.0698221	FALSE	FALSE	FALSE
ARGLU1	1.54954e-07	1.0637e-06	-30.5513	-51.7395	13	7	7.4611	0	0	0	0	0.192632	1	0.00887133	0.0488569	FALSE	FALSE	FALSE
ARHGAP11A	2.2124e-05	0.000112178	-19.3316	-34.9863	13	7	2.48212	0	0	0	0	0.356172	1	0.319362	0.609493	FALSE	FALSE	FALSE
ARHGAP29	1.03396e-13	1.4152e-12	-33.397	-69.851	13	7	11.3576	0	0	0	0	0.568622	1	0.136587	0.350461	FALSE	FALSE	FALSE
ARHGEF28	5.91319e-15	8.91373e-14	-43.879	-83.3492	13	7	22.4821	0	0	0	0	0.598563	1	0.000391459	0.00357196	FALSE	FALSE	FALSE
ARID4B	5.57749e-06	3.09537e-05	-103.097	-120.308	13	7	984.314	0	0	0	0	0.669084	1	0.00103907	0.00836886	FALSE	FALSE	FALSE
ARL2	3.63748e-08	2.78873e-07	-37.4828	-60.2582	13	7	13.3385	0	0	0	0	0.568333	1	0.0225275	0.0984501	FALSE	FALSE	FALSE
ARL6IP5	0.00221091	0.00747565	-42.4498	-52.7238	13	7	13.8465	0	0	0	0	0.0441382	1	0.118135	0.31854	FALSE	FALSE	FALSE
ARMC9	0.000222035	0.000946247	-29.541	-42.5442	13	7	4.10308	0	0	0	0	0.973028	1	0.552323	0.832309	FALSE	FALSE	FALSE
ARMT1	1.24429e-05	6.58604e-05	-29.4667	-45.7735	13	7	5.92151	0	0	0	0	1	1	0.04395	0.158789	FALSE	FALSE	FALSE
ARNTL2	1.42137e-24	4.0655e-23	-63.8532	-126.373	13	7	93.559	0	0	0	0	0.560192	1	0.00143399	0.0110509	FALSE	FALSE	FALSE
ARPC1B	7.84487e-06	4.24803e-05	-45.374	-62.2011	13	7	19.1549	0	0	0	0	0.243207	1	0.889426	1	FALSE	FALSE	FALSE
ARPC5L	4.68927e-07	3.00194e-06	-33.4804	-53.4483	13	7	8.90377	0	0	0	0	0.114759	1	0.00187408	0.0137309	FALSE	FALSE	FALSE
ARPP19	0.000255219	0.00107534	-31.5417	-44.3824	13	7	5.78671	0	0	0	0	0.572438	1	0.785396	0.98136	FALSE	FALSE	FALSE
ASAH1	0.000866697	0.00322135	-39.3056	-50.7051	13	7	9.73533	0	0	0	0	0.37443	1	0.27522	0.555432	FALSE	FALSE	FALSE
ASCC3	0.000531119	0.00208798	-37.4641	-49.4442	13	7	9.57055	0	0	0	0	0.999701	1	0.445129	0.743326	FALSE	FALSE	FALSE
ASH1L	0.00185074	0.00638177	-28.3712	-38.8606	13	7	2.85705	0	0	0	0	0.255095	1	1.86989e-06	3.03397e-05	FALSE	TRUE	FALSE
ASMTL	3.03906e-21	6.58266e-20	-35.1916	-89.7773	13	7	10.1042	0	0	0	0	0.436391	1	6.33231e-12	1.9091e-10	FALSE	TRUE	FALSE
ASNS	6.758e-08	4.89516e-07	-43.8566	-65.9548	13	7	18.7942	0	0	0	0	0.759072	1	0.188291	0.431955	FALSE	FALSE	FALSE
ASPH	6.54673e-21	1.39102e-19	-40.7194	-94.5089	13	7	21.3852	0	0	0	0	0.6181	1	9.61045e-10	2.45039e-08	FALSE	TRUE	FALSE
ASRGL1	0.000272057	0.00113769	-18.8442	-31.6102	13	7	2.20496	0	0	0	0	0.77134	1	0.789243	0.982265	FALSE	FALSE	FALSE
ATF3	3.48393e-09	3.04213e-08	-40.0968	-65.4212	13	7	23.1316	0	0	0	0	0.507333	1	2.31942e-20	1.3799e-18	FALSE	TRUE	FALSE
ATF4	3.34549e-05	0.0001641	-43.8737	-59.0577	13	7	17.0964	0	0	0	0	0.893097	1	0.534988	0.819189	FALSE	FALSE	FALSE
ATF7IP2	0.000333204	0.00137154	-18.7053	-31.234	13	7	1.92186	0	0	0	0	0.451115	1	0.270819	0.55002	FALSE	FALSE	FALSE
ATG3	0.00187192	0.006429	-42.5918	-53.0675	13	7	12.6606	0	0	0	0	0.989787	1	0.455304	0.753689	FALSE	FALSE	FALSE
ATL2	0.000100003	0.000462879	-21.6278	-35.5559	13	7	2.73332	0	0	0	0	0.341865	1	0.0843726	0.252326	FALSE	FALSE	FALSE
ATP13A3	0.00180805	0.00624905	-32.4942	-43.0118	13	7	4.75154	0	0	0	0	0.568899	1	0.944158	1	FALSE	FALSE	FALSE
ATP1B3	9.3915e-08	6.62004e-07	-39.0149	-60.7526	13	7	11.3948	0	0	0	0	0.836133	1	0.000461343	0.00415022	FALSE	FALSE	FALSE
ATP2B1	4.53091e-22	1.07405e-20	-81.1696	-137.728	13	7	252.439	0	0	0	0	0.99815	1	0.141879	0.359457	FALSE	FALSE	FALSE
ATP5F1A	2.00949e-35	9.85312e-34	-79.38	-167.561	13	7	314.356	0	0	0	0	0.854405	1	1.49034e-16	6.64991e-15	FALSE	TRUE	FALSE
ATP5F1B	2.40211e-40	1.41029e-38	-64.6796	-164.439	13	7	124.161	0	0	0	0	0.729735	1	3.68186e-05	0.000451331	FALSE	TRUE	FALSE
ATP5F1C	0.000134556	0.00060258	-58.7588	-72.3438	13	7	64.382	0	0	0	0	0.180147	1	1.55339e-12	4.88113e-11	FALSE	TRUE	FALSE
ATP5F1E	0.000709739	0.00269749	-65.573	-77.21	13	7	77.5503	0	0	0	0	0.94322	1	4.51082e-07	7.92412e-06	FALSE	TRUE	FALSE
ATP5MC2	3.4175e-07	2.21972e-06	-50.8817	-71.199	13	7	49.6936	0	0	0	0	0.885131	1	3.18327e-12	9.7957e-11	FALSE	TRUE	FALSE
ATP5MPL	2.69826e-11	2.97275e-10	-45.855	-76.4016	13	7	21.7698	0	0	0	0	0.757019	1	0.305566	0.594089	FALSE	FALSE	FALSE
ATP6V0B	0.000175922	0.00076582	-53.401	-66.6751	13	7	43.5195	0	0	0	0	0.999997	1	2.67412e-05	0.000338976	FALSE	TRUE	FALSE
ATP6V0C	7.67371e-08	5.50484e-07	-53.8599	-75.819	13	7	40.1845	0	0	0	0	1	1	1.72924e-06	2.82633e-05	FALSE	TRUE	FALSE
ATP6V1B2	4.54945e-22	1.07405e-20	-47.0336	-103.588	13	7	30.4433	0	0	0	0	0.908049	1	0.823289	0.998101	FALSE	FALSE	FALSE
ATP6V1F	0.00100593	0.00367907	-44.4758	-55.6976	13	7	15.9976	0	0	0	0	0.865847	1	0.00395768	0.025519	FALSE	FALSE	FALSE
ATP6V1G1	1.76503e-07	1.20238e-06	-47.6888	-68.7338	13	7	24.4076	0	0	0	0	0.61214	1	0.0886565	0.26094	FALSE	FALSE	FALSE
ATRX	7.85248e-08	5.62404e-07	-105.379	-127.313	13	7	767.209	0	0	0	0	0.6601	1	0.612594	0.879468	FALSE	FALSE	FALSE
AURKAIP1	7.07054e-05	0.000332092	-32.1106	-46.438	13	7	6.8099	0	0	0	0	0.977042	1	0.00222107	0.0157308	FALSE	FALSE	FALSE
AVL9	4.82975e-23	1.27517e-21	-24.2697	-83.146	13	7	5.78083	0	0	0	0	0.161799	1	2.97263e-06	4.654e-05	FALSE	TRUE	FALSE
BAMBI	5.59482e-48	4.30415e-46	-35.6563	-153.318	13	7	42.5125	0	0	0	0	0.582389	1	1.79492e-16	7.85189e-15	FALSE	TRUE	FALSE
BAZ1A	0.00154993	0.00545372	-33.0382	-43.7416	13	7	7.16244	0	0	0	0	0.648369	1	0.308274	0.596833	FALSE	FALSE	FALSE
BAZ1B	4.70696e-06	2.64848e-05	-39.7454	-57.1465	13	7	12.9621	0	0	0	0	0.194703	1	0.389171	0.68826	FALSE	FALSE	FALSE
BCAP31	0.000165542	0.000729663	-53.378	-66.7228	13	7	41.2474	0	0	0	0	0.683799	1	0.00029291	0.00276899	FALSE	FALSE	FALSE
BCL2L13	0.000959067	0.00352501	-23.2674	-34.5461	13	7	2.35714	0	0	0	0	0.0753171	1	0.684297	0.927501	FALSE	FALSE	FALSE
BCL7B	0.000153132	0.000676508	-37.6223	-51.0575	13	7	5.80461	0	0	0	0	0.691032	1	0.317386	0.607801	FALSE	FALSE	FALSE
BCLAF1	0.000480705	0.0019032	-56.5591	-68.6569	13	7	32.3796	0	0	0	0	0.963883	1	0.792891	0.983837	FALSE	FALSE	FALSE
BDH2	3.3493e-06	1.91597e-05	-27.599	-45.3812	13	7	5.10658	0	0	0	0	0.82736	1	0.528763	0.815252	FALSE	FALSE	FALSE
BEND5	2.93383e-05	0.000145615	-30.5251	-45.8587	13	7	6.69028	0	0	0	0	0.745515	1	0.838562	1	FALSE	FALSE	FALSE
BEX1	2.24646e-13	2.98325e-12	-21.873	-57.5068	13	7	5.20283	0	0	0	0	1	1	1	1	FALSE	FALSE	FALSE
BEX2	2.76593e-08	2.17282e-07	-19.1075	-42.1816	13	7	3.70152	0	0	0	0	1	1	1	1	FALSE	FALSE	FALSE
BIRC3	5.09415e-05	0.000244673	-40.9621	-55.6656	13	7	14.5853	0	0	0	0	0.988507	1	3.46094e-23	2.49076e-21	FALSE	TRUE	FALSE
BLOC1S1	3.29274e-07	2.14799e-06	-34.7617	-55.12	13	7	10.4266	0	0	0	0	0.931883	1	0.0209495	0.0931041	FALSE	FALSE	FALSE
BLOC1S2	0.000555701	0.00216553	-36.6632	-48.5899	13	7	8.44966	0	0	0	0	0.804687	1	0.80144	0.987035	FALSE	FALSE	FALSE
BMPR2	6.76152e-07	4.2433e-06	-30.3039	-49.867	13	7	6.49102	0	0	0	0	0.999933	1	0.0643204	0.209267	FALSE	FALSE	FALSE
BMS1	0.00175561	0.00609139	-47.5336	-58.0868	13	7	16.4695	0	0	0	0	0.515629	1	0.705027	0.939615	FALSE	FALSE	FALSE
BNIP3	9.7452e-61	1.08708e-58	-50.1228	-197.612	13	7	43.743	0	0	0	0	2.27243e-07	0.00101396	4.71935e-23	3.3425e-21	FALSE	TRUE	FALSE
BOD1L1	8.29769e-18	1.5112e-16	-31.3432	-77.6963	13	7	7.51057	0	0	0	0	0.884774	1	0.214793	0.471888	FALSE	FALSE	FALSE
BRD2	7.26702e-16	1.17911e-14	-60.2319	-101.904	13	7	72.9599	0	0	0	0	0.471445	1	0.185022	0.426871	FALSE	FALSE	FALSE
BRD8	5.33602e-10	5.08746e-09	-70.3105	-97.6591	13	7	118.728	0	0	0	0	1	1	0.0156867	0.0754833	FALSE	FALSE	FALSE
BST2	1.2422e-09	1.14994e-08	-33.2521	-59.6905	13	7	5.34788	0	0	0	0	0.99975	1	0.844381	1	FALSE	FALSE	FALSE
BUB1	5.58711e-05	0.000266628	-31.1925	-45.7902	13	7	5.39185	0	0	0	0	0.352399	1	0.159198	0.385218	FALSE	FALSE	FALSE
BZW1	0.000618878	0.0023826	-42.6346	-54.4339	13	7	16.4976	0	0	0	0	0.946289	1	0.44272	0.74208	FALSE	FALSE	FALSE
C12orf57	5.99738e-08	4.40136e-07	-42.9293	-65.1581	13	7	20.1369	0	0	0	0	0.556805	1	0.134323	0.346962	FALSE	FALSE	FALSE
C12orf75	9.07437e-39	4.99875e-37	-52.9295	-148.982	13	7	51.0946	0	0	0	0	0.511894	1	0.0177925	0.0823551	FALSE	FALSE	FALSE
C17orf64	2.12585e-08	1.69687e-07	-23.2536	-46.6146	13	7	4.07198	0	0	0	0	0.758754	1	0.772218	0.977991	FALSE	FALSE	FALSE
C17orf98	0.000218593	0.00093247	-20.9456	-33.967	13	7	2.59226	0	0	0	0	1	1	1	1	FALSE	FALSE	FALSE
C1D	2.23395e-07	1.48997e-06	-46.672	-67.4578	13	7	16.3542	0	0	0	0	0.96901	1	0.865469	1	FALSE	FALSE	FALSE
C1GALT1	5.368e-06	2.99026e-05	-52.289	-69.5426	13	7	20.712	0	0	0	0	0.381602	1	0.930568	1	FALSE	FALSE	FALSE
C1QBP	8.15416e-06	4.3995e-05	-54.5019	-71.2855	13	7	40.3079	0	0	0	0	0.132787	1	0.000147689	0.00153253	FALSE	FALSE	FALSE
C1R	1.4265e-16	2.43872e-15	-36.6798	-80.0589	13	7	9.59166	0	0	0	0	0.0961073	1	0.854347	1	FALSE	FALSE	FALSE
C1S	1.00282e-30	3.92507e-29	-49.0624	-126.16	13	7	33.0742	0	0	0	0	0.999999	1	9.29802e-07	1.57748e-05	FALSE	TRUE	FALSE
C3	2.61324e-43	1.66575e-41	-37.28	-143.997	13	7	25.5484	0	0	0	0	0.494555	1	2.0832e-06	3.34361e-05	FALSE	TRUE	FALSE
C3orf49	6.4833e-57	6.42855e-55	-27.9219	-166.484	13	7	19.7244	0	0	0	0	0.422963	1	0.982023	1	FALSE	FALSE	FALSE
C5orf15	9.68082e-19	1.87808e-17	-42.5157	-91.1096	13	7	14.9014	0	0	0	0	1	1	6.0449e-14	2.30533e-12	FALSE	TRUE	FALSE
C5orf51	0.000376215	0.00153163	-27.7455	-40.1317	13	7	4.97298	0	0	0	0	0.572081	1	0.999946	1	FALSE	FALSE	FALSE
C6orf62	8.99542e-35	4.18099e-33	-71.6146	-158.262	13	7	151.254	0	0	0	0	0.352278	1	0.0836168	0.250907	FALSE	FALSE	FALSE
C9orf85	9.72763e-13	1.21923e-11	-25.5908	-59.6724	13	7	3.98518	0	0	0	0	0.668453	1	0.75704	0.968438	FALSE	FALSE	FALSE
CADM3	3.56245e-11	3.87699e-10	-24.1634	-54.4133	13	7	5.04224	0	0	0	0	0.447947	1	0.268217	0.547476	FALSE	FALSE	FALSE
CALCOCO2	7.05303e-08	5.09234e-07	-42.7646	-64.8161	13	7	11.5792	0	0	0	0	0.560693	1	0.463083	0.758353	FALSE	FALSE	FALSE
CALD1	2.50112e-44	1.69091e-42	-52.1079	-161.215	13	7	56.2113	0	0	0	0	1.2712e-05	0.0113442	7.89892e-09	1.79821e-07	FALSE	TRUE	FALSE
CALM1	1.34192e-07	9.26881e-07	-66.9715	-88.3177	13	7	74.2114	0	0	0	0	0.407044	1	0.109714	0.304065	FALSE	FALSE	FALSE
CALR	0.00162293	0.00567517	-62.3402	-72.9882	13	7	39.5331	0	0	0	0	0.866882	1	0.00480757	0.0302132	FALSE	FALSE	FALSE
CALU	2.52354e-06	1.47382e-05	-37.9964	-56.0951	13	7	13.1077	0	0	0	0	0.939516	1	6.14958e-06	8.81794e-05	FALSE	TRUE	FALSE
CAMLG	1.05034e-09	9.74345e-09	-44.0244	-70.6437	13	7	22.5486	0	0	0	0	0.569411	1	0.000310197	0.00291389	FALSE	FALSE	FALSE
CAMTA1	1.31742e-14	1.95293e-13	-28.0828	-66.7098	13	7	7.30345	0	0	0	0	0.941947	1	0.00101065	0.00816946	FALSE	FALSE	FALSE
CAND1	0.00175832	0.00609607	-37.3966	-47.9479	13	7	10.016	0	0	0	0	0.570158	1	0.0316098	0.125595	FALSE	FALSE	FALSE
CANX	0.00166794	0.00581888	-59.2346	-69.8496	13	7	41.7135	0	0	0	0	0.494717	1	0.0189485	0.086362	FALSE	FALSE	FALSE
CAP1	6.43051e-13	8.22147e-12	-47.6868	-82.2072	13	7	33.343	0	0	0	0	0.968988	1	4.9422e-08	9.97833e-07	FALSE	TRUE	FALSE
CAP2	6.1287e-06	3.38025e-05	-19.7608	-36.8656	13	7	3.13806	0	0	0	0	0.576264	1	0.0231831	0.10043	FALSE	FALSE	FALSE
CAPG	7.18877e-14	9.99262e-13	-29.7233	-66.5612	13	7	7.69589	0	0	0	0	0.999658	1	0.901041	1	FALSE	FALSE	FALSE
CAPNS1	0.00228185	0.00768424	-39.2824	-49.5181	13	7	9.57343	0	0	0	0	1	1	0.334785	0.627651	FALSE	FALSE	FALSE
CARS2	3.74563e-05	0.000182856	-31.1285	-46.1836	13	7	7.38416	0	0	0	0	0.8493	1	0.0465773	0.166262	FALSE	FALSE	FALSE
CASP4	1.42472e-14	2.105e-13	-30.3257	-68.8702	13	7	7.32207	0	0	0	0	0.763154	1	0.0501339	0.174355	FALSE	FALSE	FALSE
CAST	3.31886e-27	1.0731e-25	-54.3667	-123.134	13	7	45.9081	0	0	0	0	0.58713	1	0.680558	0.924703	FALSE	FALSE	FALSE
CAV1	1.11092e-18	2.13661e-17	-34.7261	-83.1767	13	7	12.1988	0	0	0	0	0.0495018	1	0.000116988	0.00124881	FALSE	FALSE	FALSE
CBR1	0.00013068	0.000587204	-37.1301	-50.7491	13	7	11.3637	0	0	0	0	1	1	0.00591945	0.0357588	FALSE	FALSE	FALSE
CCAR1	0.000824286	0.00308828	-45.6627	-57.1219	13	7	18.4906	0	0	0	0	0.776898	1	0.314054	0.603493	FALSE	FALSE	FALSE
CCAR2	1.50629e-05	7.83341e-05	-32.3866	-48.4772	13	7	4.2148	0	0	0	0	0.163033	1	3.98428e-05	0.000483094	FALSE	TRUE	FALSE
CCDC173	4.42546e-08	3.33554e-07	-41.735	-64.2962	13	7	15.4359	0	0	0	0	0.238336	1	0.955423	1	FALSE	FALSE	FALSE
CCDC174	0.00111444	0.00403295	-41.5583	-52.6577	13	7	11.8606	0	0	0	0	0.631342	1	2.21228e-13	7.77259e-12	FALSE	TRUE	FALSE
CCDC198	1.23459e-59	1.31161e-57	-35.3556	-180.27	13	7	24.8485	0	0	0	0	0.891264	1	0.0327541	0.128765	FALSE	FALSE	FALSE
CCDC50	3.30174e-11	3.61087e-10	-68.2832	-98.6143	13	7	83.3942	0	0	0	0	0.425678	1	0.141946	0.359457	FALSE	FALSE	FALSE
CCDC80	0.000212735	0.000909217	-28.1924	-41.2455	13	7	3.66462	0	0	0	0	0.584265	1	0.744168	0.961436	FALSE	FALSE	FALSE
CCDC82	4.31404e-11	4.64958e-10	-35.0204	-65.0658	13	7	9.94103	0	0	0	0	0.992497	1	0.546184	0.829501	FALSE	FALSE	FALSE
CCL2	3.85629e-07	2.48294e-06	-40.9597	-61.1436	13	7	12.8615	0	0	0	0	0.486142	1	0.636591	0.895824	FALSE	FALSE	FALSE
CCL5	6.12519e-95	2.10236e-92	-31.8007	-258.9	13	7	100.822	0	0	0	0	0.326926	1	7.38524e-141	1.64765e-137	FALSE	TRUE	FALSE
CCN1	8.7713e-16	1.402e-14	-43.2134	-84.6885	13	7	16.4542	0	0	0	0	3.13627e-06	0.00349851	0.003535	0.0231821	FALSE	FALSE	FALSE
CCN2	2.75822e-29	9.39479e-28	-27.2692	-100.963	13	7	16.0102	0	0	0	0	0.968759	1	1.49271e-20	9.00063e-19	FALSE	TRUE	FALSE
CCNG1	1.27963e-05	6.74866e-05	-46.6295	-62.9045	13	7	19.3215	0	0	0	0	0.907055	1	0.429588	0.727723	FALSE	FALSE	FALSE
CCNH	3.01029e-05	0.000148913	-42.1438	-57.4482	13	7	12.1209	0	0	0	0	0.33385	1	0.293752	0.580478	FALSE	FALSE	FALSE
CCNL1	0.00156631	0.00550305	-46.6604	-57.3512	13	7	22.9823	0	0	0	0	1	1	4.35726e-25	3.60039e-23	FALSE	TRUE	FALSE
CCPG1	1.15547e-49	9.54758e-48	-45.2533	-166.86	13	7	29.6829	0	0	0	0	0.572409	1	8.46566e-17	3.93477e-15	FALSE	TRUE	FALSE
CCT4	0.000171481	0.000749412	-65.2444	-78.5482	13	7	82.0725	0	0	0	0	0.987247	1	0.851951	1	FALSE	FALSE	FALSE
CCT7	1.00394e-08	8.37305e-08	-57.8943	-82.0713	13	7	57.3026	0	0	0	0	0.269137	1	6.16584e-06	8.81794e-05	FALSE	TRUE	FALSE
CCT8	2.1613e-15	3.33693e-14	-101.485	-142.013	13	7	663.628	0	0	0	0	0.484468	1	0.0242138	0.10339	FALSE	FALSE	FALSE
CD151	1.48551e-09	1.36106e-08	-54.751	-80.9965	13	7	45.0552	0	0	0	0	0.0901771	1	0.0958098	0.275987	FALSE	FALSE	FALSE
CD40	0.000386888	0.00156936	-18.5578	-30.9112	13	7	1.89852	0	0	0	0	1	1	1	1	FALSE	FALSE	FALSE
CD44	8.9372e-30	3.1649e-28	-44.0225	-118.874	13	7	24.5863	0	0	0	0	0.348216	1	0.191522	0.437569	FALSE	FALSE	FALSE
CD63	0.00065549	0.00251056	-60.939	-72.6703	13	7	57.1818	0	0	0	0	1	1	3.46513e-08	7.25889e-07	FALSE	TRUE	FALSE
CD9	2.92392e-21	6.36416e-20	-47.1985	-101.824	13	7	29.621	0	0	0	0	1	1	0.125134	0.331647	FALSE	FALSE	FALSE
CDC14A	9.67559e-22	2.20268e-20	-24.4942	-80.2668	13	7	9.02507	0	0	0	0	0.0129473	1	5.177e-47	1.00434e-44	FALSE	TRUE	FALSE
CDC16	0.000246165	0.00104113	-36.6938	-49.5767	13	7	7.31599	0	0	0	0	0.562847	1	0.0447292	0.161083	FALSE	FALSE	FALSE
CDC42	0.00270102	0.00892737	-73.6148	-83.6453	13	7	83.2168	0	0	0	0	0.236022	1	0.91947	1	FALSE	FALSE	FALSE
CDC42EP3	0.000117904	0.000534644	-30.8698	-44.6078	13	7	4.41775	0	0	0	0	0.862452	1	0.95969	1	FALSE	FALSE	FALSE
CDH11	3.90584e-13	5.11081e-12	-19.0313	-54.0798	13	7	3.06592	0	0	0	0	0.773112	1	0.788488	0.982265	FALSE	FALSE	FALSE
CDH2	4.93962e-06	2.77589e-05	-31.7174	-49.0644	13	7	6.23584	0	0	0	0	0.156075	1	0.19737	0.445681	FALSE	FALSE	FALSE
CDK5RAP3	0.00187308	0.006429	-32.7396	-43.2145	13	7	6.76278	0	0	0	0	0.59816	1	0.386349	0.684898	FALSE	FALSE	FALSE
CDKL2	2.07596e-10	2.08625e-09	-22.2167	-50.5796	13	7	4.87645	0	0	0	0	1	1	1	1	FALSE	FALSE	FALSE
CDKN1A	5.85675e-08	4.31736e-07	-36.2596	-58.5144	13	7	14.4405	0	0	0	0	0.673974	1	0.0381444	0.144345	FALSE	FALSE	FALSE
CEBPZ	7.76437e-18	1.4257e-16	-71.5923	-118.015	13	7	174.957	0	0	0	0	0.193364	1	0.649043	0.905389	FALSE	FALSE	FALSE
CEP170	0.00100387	0.00367454	-26.2636	-37.4879	13	7	3.31283	0	0	0	0	0.999849	1	0.571394	0.846779	FALSE	FALSE	FALSE
CEP55	3.09648e-08	2.40705e-07	-39.5293	-62.4804	13	7	13.471	0	0	0	0	0.999983	1	0.156418	0.380554	FALSE	FALSE	FALSE
CEP63	1.13493e-12	1.4106e-11	-41.8005	-75.7186	13	7	16.9525	0	0	0	0	0.769271	1	0.0672948	0.215105	FALSE	FALSE	FALSE
CERCAM	0.000879967	0.00326657	-33.8535	-45.2349	13	7	5.60423	0	0	0	0	0.839854	1	0.761958	0.97034	FALSE	FALSE	FALSE
CERS2	2.24085e-08	1.78229e-07	-30.6062	-53.9099	13	7	6.39662	0	0	0	0	0.0788896	1	0.0473747	0.168435	FALSE	FALSE	FALSE
CETN2	6.53739e-05	0.000307699	-33.6521	-48.0696	13	7	7.13663	0	0	0	0	0.965302	1	0.151578	0.373051	FALSE	FALSE	FALSE
CFHR2	1.69252e-118	1.07886e-115	-38.2152	-319.99	13	7	95.3836	0	0	0	0	0.827262	1	0.015255	0.0739063	FALSE	FALSE	FALSE
CGNL1	1.22181e-06	7.42739e-06	-26.1515	-45.0582	13	7	4.26908	0	0	0	0	0.98592	1	0.0532477	0.181923	FALSE	FALSE	FALSE
CHCHD10	1.2863e-06	7.77704e-06	-35.0374	-53.8869	13	7	8.11833	0	0	0	0	0.448721	1	0.895971	1	FALSE	FALSE	FALSE
CHD4	4.19208e-14	5.9952e-13	-67.7031	-105.11	13	7	88.493	0	0	0	0	0.609189	1	0.0100622	0.0540284	FALSE	FALSE	FALSE
CHD5	2.07978e-08	1.66307e-07	-28.8745	-52.2594	13	7	13.4633	0	0	0	0	0.580954	1	0.276342	0.55674	FALSE	FALSE	FALSE
CHD7	7.4451e-08	5.36539e-07	-46.4917	-68.4839	13	7	17.6385	0	0	0	0	0.427376	1	0.578022	0.849797	FALSE	FALSE	FALSE
CHEK2	1.32632e-09	1.22022e-08	-23.0937	-49.4614	13	7	3.13382	0	0	0	0	0.26771	1	4.61745e-19	2.51257e-17	FALSE	TRUE	FALSE
CHID1	0.000423728	0.00170735	-33.9603	-46.2067	13	7	8.77438	0	0	0	0	0.181931	1	0.000241452	0.00236402	FALSE	FALSE	FALSE
CHPF	0.00120467	0.00434537	-25.3865	-36.3927	13	7	3.03584	0	0	0	0	0.801835	1	0.70354	0.939317	FALSE	FALSE	FALSE
CIB1	0.000187341	0.000813146	-36.3687	-49.5697	13	7	10.7422	0	0	0	0	0.69227	1	0.00143166	0.0110509	FALSE	FALSE	FALSE
CITED2	2.31207e-08	1.83241e-07	-19.4178	-42.6873	13	7	2.37671	0	0	0	0	0.00719363	1	0.00848428	0.047262	FALSE	FALSE	FALSE
CKAP2L	8.3984e-13	1.06158e-11	-45.1247	-79.3621	13	7	20.6429	0	0	0	0	0.999999	1	0.193265	0.440424	FALSE	FALSE	FALSE
CKAP4	0.000475255	0.00188497	-16.0591	-28.1703	13	7	2.15479	0	0	0	0	0.962733	1	0.0210613	0.0935081	FALSE	FALSE	FALSE
CLASP1	1.00015e-08	8.37276e-08	-44.2081	-68.3893	13	7	14.7021	0	0	0	0	1	1	1.37608e-12	4.35467e-11	FALSE	TRUE	FALSE
CLDN10	7.44237e-06	4.05964e-05	-20.6194	-37.5058	13	7	2.9661	0	0	0	0	0.600052	1	0.563229	0.842483	FALSE	FALSE	FALSE
CLDN2	6.69899e-10	6.29282e-09	-19.9574	-47.0612	13	7	4.19307	0	0	0	0	1	1	1	1	FALSE	FALSE	FALSE
CLEC2B	2.00173e-05	0.000102311	-22.712	-38.4803	13	7	2.18244	0	0	0	0	0.205273	1	0.912986	1	FALSE	FALSE	FALSE
CLEC4D	4.68713e-80	8.71415e-78	-37.6177	-230.117	13	7	61.4281	0	0	0	0	1	1	1	1	FALSE	FALSE	FALSE
CLIC4	2.06184e-10	2.07673e-09	-42.5947	-70.9649	13	7	15.5702	0	0	0	0	0.816836	1	0.629821	0.892997	FALSE	FALSE	FALSE
CLIP1	6.82146e-08	4.93312e-07	-51.9941	-74.082	13	7	31.0523	0	0	0	0	0.305592	1	0.676461	0.922089	FALSE	FALSE	FALSE
CLK1	2.64495e-10	2.61101e-09	-56.171	-84.2739	13	7	55.8521	0	0	0	0	0.979933	1	2.48173e-09	5.92164e-08	FALSE	TRUE	FALSE
CLNS1A	5.14047e-10	4.91151e-09	-36.4717	-63.8605	13	7	11.5758	0	0	0	0	0.557487	1	0.0509366	0.176502	FALSE	FALSE	FALSE
CLPX	6.65864e-24	1.834e-22	-45.3303	-106.255	13	7	30.4654	0	0	0	0	0.205902	1	0.728804	0.953364	FALSE	FALSE	FALSE
CLTA	8.89799e-74	1.32343e-71	-53.3979	-231.284	13	7	66.475	0	0	0	0	0.995093	1	0.870156	1	FALSE	FALSE	FALSE
CLYBL	0.000328572	0.00135623	-26.11	-38.6551	13	7	3.35749	0	0	0	0	0.999848	1	0.570572	0.846779	FALSE	FALSE	FALSE
CMBL	2.1197e-07	1.42656e-06	-12.9451	-33.7887	13	7	2.97909	0	0	0	0	0.99995	1	0.00258386	0.0178058	FALSE	FALSE	FALSE
CMTM6	1.08444e-08	8.99397e-08	-49.0903	-73.1835	13	7	32.0731	0	0	0	0	1	1	0.000133254	0.00139901	FALSE	FALSE	FALSE
CNBD2	3.66541e-06	2.08345e-05	-20.3507	-38.032	13	7	2.78555	0	0	0	0	0.449128	1	0.26885	0.548446	FALSE	FALSE	FALSE
CNGA1	1.67624e-08	1.35989e-07	-17.4136	-41.0333	13	7	2.30397	0	0	0	0	0.968185	1	0.844577	1	FALSE	FALSE	FALSE
CNKSR2	3.2864e-11	3.60292e-10	-25.8103	-56.1463	13	7	6.32275	0	0	0	0	0.648146	1	0.416343	0.716161	FALSE	FALSE	FALSE
CNOT10	0.000941267	0.00347102	-33.3415	-44.6426	13	7	8.09336	0	0	0	0	0.764386	1	0.0703506	0.22208	FALSE	FALSE	FALSE
CNOT2	0.000148218	0.000655451	-35.6186	-49.0916	13	7	5.80339	0	0	0	0	0.263205	1	0.631267	0.893761	FALSE	FALSE	FALSE
CNTLN	0.00209789	0.00711306	-39.4561	-49.7938	13	7	8.34204	0	0	0	0	0.815988	1	0.690192	0.930685	FALSE	FALSE	FALSE
COL11A1	8.70242e-06	4.68398e-05	-18.2224	-34.9326	13	7	2.33002	0	0	0	0	1	1	1	1	FALSE	FALSE	FALSE
COL12A1	1.39332e-08	1.14283e-07	-24.5966	-48.4174	13	7	3.84906	0	0	0	0	0.337192	1	0.279476	0.562125	FALSE	FALSE	FALSE
COL1A2	1.4518e-70	1.90527e-68	-48.7216	-219.125	13	7	65.3587	0	0	0	0	0.730136	1	9.35652e-09	2.11923e-07	FALSE	TRUE	FALSE
COL3A1	0.000548389	0.00214453	-18.4452	-30.3876	13	7	1.65182	0	0	0	0	0.984256	1	0.664734	0.916577	FALSE	FALSE	FALSE
COL6A3	7.94382e-23	2.03709e-21	-33.8392	-92.2007	13	7	11.5189	0	0	0	0	0.816966	1	0.0255922	0.108035	FALSE	FALSE	FALSE
COL8A1	7.33552e-11	7.73784e-10	-36.1001	-65.5777	13	7	7.76166	0	0	0	0	0.679141	1	5.89357e-08	1.15338e-06	FALSE	TRUE	FALSE
COMT	6.34919e-06	3.49323e-05	-40.0712	-57.1363	13	7	10.9949	0	0	0	0	0.603053	1	0.0280632	0.115302	FALSE	FALSE	FALSE
COPB2	2.86467e-06	1.65787e-05	-46.5215	-64.4785	13	7	15.4973	0	0	0	0	0.940577	1	0.0426847	0.155909	FALSE	FALSE	FALSE
COPE	0.00161754	0.00566075	-49.3319	-59.9839	13	7	24.3262	0	0	0	0	0.384669	1	0.252205	0.523656	FALSE	FALSE	FALSE
COPS2	3.41124e-14	4.90999e-13	-53.89	-91.5144	13	7	44.6053	0	0	0	0	0.944978	1	8.07292e-24	6.31954e-22	FALSE	TRUE	FALSE
COPS3	0.00237485	0.00795539	-34.701	-44.8881	13	7	7.74427	0	0	0	0	0.319806	1	0.00551394	0.0336109	FALSE	FALSE	FALSE
COPZ1	2.50638e-05	0.000126224	-38.7257	-54.2386	13	7	9.87015	0	0	0	0	0.678241	1	0.666964	0.918234	FALSE	FALSE	FALSE
COQ5	0.000260794	0.00109676	-30.0118	-42.8273	13	7	5.58672	0	0	0	0	0.989832	1	0.206971	0.460832	FALSE	FALSE	FALSE
COX16	1.81311e-07	1.23137e-06	-37.8065	-58.822	13	7	9.88943	0	0	0	0	0.940903	1	0.938713	1	FALSE	FALSE	FALSE
COX19	3.52808e-08	2.71887e-07	-29.0635	-51.8721	13	7	3.63533	0	0	0	0	0.189947	1	6.16787e-13	2.05381e-11	FALSE	TRUE	FALSE
COX8A	1.68407e-10	1.70393e-09	-68.5339	-97.1212	13	7	72.8492	0	0	0	0	0.997484	1	0.00137083	0.0107121	FALSE	FALSE	FALSE
CPE	6.43065e-17	1.12524e-15	-43.0846	-87.2976	13	7	21.9006	0	0	0	0	0.558997	1	0.929056	1	FALSE	FALSE	FALSE
CPEB2	4.72208e-10	4.53116e-09	-29.8938	-57.3739	13	7	5.91623	0	0	0	0	1	1	1.04017e-23	7.8665e-22	FALSE	TRUE	FALSE
CPLANE1	1.6382e-11	1.81832e-10	-58.5181	-89.5971	13	7	41.7217	0	0	0	0	0.574223	1	0.495371	0.787008	FALSE	FALSE	FALSE
CPM	1.56482e-20	3.26272e-19	-23.1015	-75.9863	13	7	12.4049	0	0	0	0	1	1	1	1	FALSE	FALSE	FALSE
CPNE1	8.19979e-14	1.13274e-12	-56.6975	-93.3964	13	7	56.7984	0	0	0	0	0.962819	1	0.35801	0.655225	FALSE	FALSE	FALSE
CPNE8	0.000225137	0.000956724	-17.24	-30.227	13	7	2.19263	0	0	0	0	1	1	1	1	FALSE	FALSE	FALSE
CRBN	1.0748e-26	3.37729e-25	-38.7104	-106.268	13	7	13.7997	0	0	0	0	0.795265	1	4.46033e-18	2.21133e-16	FALSE	TRUE	FALSE
CREB5	3.18601e-10	3.10392e-09	-20.5204	-48.4234	13	7	3.82431	0	0	0	0	0.703602	1	1.92836e-22	1.32375e-20	FALSE	TRUE	FALSE
CRIP2	3.0098e-05	0.000148913	-28.5539	-43.8584	13	7	5.03793	0	0	0	0	0.943142	1	0.636395	0.895824	FALSE	FALSE	FALSE
CRK	2.38877e-06	1.40246e-05	-21.0334	-39.1934	13	7	3.62473	0	0	0	0	0.363272	1	0.066483	0.213415	FALSE	FALSE	FALSE
CRLF2	2.20211e-45	1.53528e-43	-27.1599	-138.741	13	7	16.0542	0	0	0	0	0.858824	1	0.795656	0.984457	FALSE	FALSE	FALSE
CTBS	5.17542e-05	0.000248042	-21.8045	-36.4899	13	7	2.21436	0	0	0	0	0.772222	1	0.923624	1	FALSE	FALSE	FALSE
CTH	2.21411e-07	1.48116e-06	-30.5491	-51.3447	13	7	6.49344	0	0	0	0	0.999965	1	0.347696	0.643208	FALSE	FALSE	FALSE
CTNNB1	3.87718e-12	4.56464e-11	-39.0551	-71.6686	13	7	13.2099	0	0	0	0	0.528769	1	0.560752	0.840333	FALSE	FALSE	FALSE
CTSB	2.86456e-10	2.803e-09	-49.1152	-77.1325	13	7	25.9705	0	0	0	0	0.967422	1	0.000357963	0.00332152	FALSE	FALSE	FALSE
CTSL	2.27353e-78	3.75722e-76	-57.674	-246.251	13	7	104.448	0	0	0	0	0.521909	1	0.568938	0.846749	FALSE	FALSE	FALSE
CTSS	1.09456e-18	2.11425e-17	-26.7956	-75.2616	13	7	5.65412	0	0	0	0	0.833822	1	0.134821	0.347385	FALSE	FALSE	FALSE
CTTN	1.90709e-08	1.53877e-07	-47.7346	-71.2139	13	7	21.585	0	0	0	0	0.131273	1	0.00267459	0.0183601	FALSE	FALSE	FALSE
CUL1	4.71373e-07	3.01328e-06	-33.8528	-53.815	13	7	10.116	0	0	0	0	0.686687	1	0.0345552	0.134191	FALSE	FALSE	FALSE
CUL3	7.63849e-06	4.15139e-05	-54.4027	-71.2598	13	7	32.7265	0	0	0	0	0.353762	1	0.0382908	0.144669	FALSE	FALSE	FALSE
CUTA	0.000100923	0.000465906	-50.3012	-64.2188	13	7	33.7278	0	0	0	0	1	1	1.63404e-12	5.09865e-11	FALSE	TRUE	FALSE
CWC15	1.79352e-21	3.96173e-20	-55.5351	-110.668	13	7	58.2506	0	0	0	0	0.122497	1	0.399312	0.69954	FALSE	FALSE	FALSE
CXADR	1.31285e-05	6.89979e-05	-22.0811	-38.3272	13	7	2.96394	0	0	0	0	0.757499	1	0.776389	0.98001	FALSE	FALSE	FALSE
CXCL12	1.28782e-60	1.40153e-58	-40.4819	-187.688	13	7	33.1844	0	0	0	0	0.985736	1	1.65958e-09	4.0687e-08	FALSE	TRUE	FALSE
CXCL14	4.28803e-22	1.02867e-20	-42.0309	-98.6467	13	7	27.3376	0	0	0	0	0.481315	1	0.496244	0.787361	FALSE	FALSE	FALSE
CXCL2	0.00295511	0.00965278	-18.6897	-28.6104	13	7	2.95754	0	0	0	0	0.579765	1	0.275148	0.555432	FALSE	FALSE	FALSE
CYB5R3	2.88559e-05	0.00014354	-43.6579	-59.0105	13	7	18.1905	0	0	0	0	0.756475	1	0.0862629	0.256091	FALSE	FALSE	FALSE
CYBA	8.49256e-12	9.64219e-11	-22.5547	-54.3339	13	7	4.76364	0	0	0	0	0.764955	1	0.776183	0.98001	FALSE	FALSE	FALSE
CYBRD1	0.000346301	0.00142152	-34.5408	-47.0243	13	7	9.43035	0	0	0	0	0.999915	1	0.00140952	0.0109189	FALSE	FALSE	FALSE
CYFIP2	4.6541e-07	2.9837e-06	-20.2904	-40.2666	13	7	3.03672	0	0	0	0	0.766048	1	0.778465	0.98001	FALSE	FALSE	FALSE
CYHR1	0.00295413	0.00965278	-23.9511	-33.8722	13	7	2.55996	0	0	0	0	0.353209	1	0.380338	0.679212	FALSE	FALSE	FALSE
CYP3A5	6.47868e-40	3.70614e-38	-47.5327	-146.28	13	7	43.2683	0	0	0	0	0.738793	1	0.419137	0.716367	FALSE	FALSE	FALSE
CSE1L	0.000541933	0.00212115	-51.9536	-63.91	13	7	29.8861	0	0	0	0	0.236129	1	0.304862	0.593496	FALSE	FALSE	FALSE
CSKMT	3.93984e-11	4.26689e-10	-26.9175	-57.0598	13	7	7.23478	0	0	0	0	1	1	0.904291	1	FALSE	FALSE	FALSE
CST3	2.70885e-22	6.64116e-21	-70.0996	-127.191	13	7	142.937	0	0	0	0	0.313707	1	0.0140579	0.0698221	FALSE	FALSE	FALSE
DACH2	7.82139e-90	2.05289e-87	-31.8414	-247.077	13	7	43.5312	0	0	0	0	1	1	1	1	FALSE	FALSE	FALSE
DAP	3.92143e-07	2.52124e-06	-38.2506	-58.4161	13	7	11.7413	0	0	0	0	0.961756	1	0.932152	1	FALSE	FALSE	FALSE
DCAF13	7.68996e-06	4.17428e-05	-34.2085	-51.0581	13	7	8.89822	0	0	0	0	0.435777	1	0.000382992	0.00350187	FALSE	FALSE	FALSE
DCAF6	0.00271065	0.00895259	-35.7487	-45.7748	13	7	7.79171	0	0	0	0	0.833008	1	0.97562	1	FALSE	FALSE	FALSE
DDIT4	0.000487885	0.00192992	-20.8436	-32.9239	13	7	3.82654	0	0	0	0	0.396065	1	0.759986	0.970085	FALSE	FALSE	FALSE
DDOST	7.96402e-06	4.30733e-05	-49.0198	-65.8299	13	7	21.734	0	0	0	0	0.0881704	1	0.462457	0.758353	FALSE	FALSE	FALSE
DDRGK1	0.000132993	0.000596398	-37.2724	-50.871	13	7	10.3957	0	0	0	0	0.458753	1	0.0643467	0.209267	FALSE	FALSE	FALSE
DDX1	1.07528e-17	1.93463e-16	-63.916	-109.999	13	7	72.314	0	0	0	0	0.565819	1	0.00176896	0.0131333	FALSE	FALSE	FALSE
DDX17	1.75331e-24	4.98296e-23	-26.5293	-88.8328	13	7	11.3899	0	0	0	0	1	1	1	1	FALSE	FALSE	FALSE
DDX39A	1.60561e-06	9.5907e-06	-50.4381	-69.0409	13	7	31.861	0	0	0	0	0.807599	1	2.29075e-05	0.000294563	FALSE	TRUE	FALSE
DDX3X	2.7727e-09	2.43539e-08	-74.0518	-99.6232	13	7	152.344	0	0	0	0	1	1	6.66746e-29	6.61115e-27	FALSE	TRUE	FALSE
DDX3Y	3.01966e-05	0.000149211	-53.4915	-68.7923	13	7	25.9523	0	0	0	0	0.848781	1	0.00534026	0.0328213	FALSE	FALSE	FALSE
DDX41	2.07956e-08	1.66307e-07	-39.5944	-62.9794	13	7	10.2489	0	0	0	0	0.998398	1	0.547905	0.830255	FALSE	FALSE	FALSE
DDX5	0.000623021	0.00239236	-59.8242	-71.6156	13	7	72.3332	0	0	0	0	0.00819392	1	0.0235675	0.101602	FALSE	FALSE	FALSE
DDX55	4.84073e-09	4.1378e-08	-66.4947	-91.463	13	7	68.4945	0	0	0	0	0.657348	1	0.310736	0.599261	FALSE	FALSE	FALSE
DDX58	3.05493e-118	1.70389e-115	-63.1759	-344.356	13	7	1033.34	0	0	0	0	0.867998	1	1.54621e-117	1.37984e-114	FALSE	TRUE	FALSE
DENR	1.48084e-07	1.01811e-06	-68.9998	-90.2378	13	7	72.8393	0	0	0	0	0.789964	1	0.634111	0.894531	FALSE	FALSE	FALSE
DHDH	0.000211543	0.00090499	-16.1274	-29.187	13	7	1.94631	0	0	0	0	1	1	1	1	FALSE	FALSE	FALSE
DHRSX	1.09267e-06	6.7063e-06	-26.8798	-45.9106	13	7	3.00639	0	0	0	0	0.0691195	1	0.0211238	0.0936923	FALSE	FALSE	FALSE
DHX58	2.04964e-12	2.47175e-11	-31.7668	-65.0576	13	7	16.4499	0	0	0	0	0.442399	1	8.39693e-14	3.09646e-12	FALSE	TRUE	FALSE
DIAPH1	3.58178e-41	2.13092e-39	-36.203	-137.904	13	7	16.1158	0	0	0	0	0.612438	1	6.59889e-09	1.50996e-07	FALSE	TRUE	FALSE
DISC1	3.39457e-11	3.70331e-10	-18.591	-48.8925	13	7	2.56842	0	0	0	0	0.98515	1	0.0810799	0.244445	FALSE	FALSE	FALSE
DKK3	2.98149e-10	2.91103e-09	-21.4166	-49.3908	13	7	3.77071	0	0	0	0	0.554061	1	0.0220868	0.0967139	FALSE	FALSE	FALSE
DNAJB1	4.05677e-08	3.07323e-07	-32.733	-55.3891	13	7	7.77896	0	0	0	0	0.93954	1	0.00793162	0.0447986	FALSE	FALSE	FALSE
DNAJB4	2.08348e-21	4.5571e-20	-50.8798	-105.857	13	7	34.8719	0	0	0	0	0.0406297	1	2.01293e-23	1.47241e-21	FALSE	TRUE	FALSE
DNAJB6	1.2629e-05	6.6766e-05	-33.7313	-50.0212	13	7	7.35496	0	0	0	0	0.847706	1	0.377611	0.676938	FALSE	FALSE	FALSE
DNAJC15	3.71025e-08	2.82994e-07	-19.6924	-42.4461	13	7	2.1828	0	0	0	0	0.94347	1	0.481378	0.776259	FALSE	FALSE	FALSE
DNAJC2	0.0013967	0.00496185	-36.8367	-47.6653	13	7	9.76505	0	0	0	0	0.137483	1	0.830349	1	FALSE	FALSE	FALSE
DNAJC3	0.000782348	0.00294834	-28.5263	-40.0476	13	7	4.33625	0	0	0	0	0.204567	1	0.67217	0.920356	FALSE	FALSE	FALSE
DNPH1	4.8457e-14	6.84225e-13	-18.0856	-55.3398	13	7	4.32573	0	0	0	0	0.970057	1	0.0107502	0.0562566	FALSE	FALSE	FALSE
DOCK4	1.62791e-15	2.5667e-14	-18.7224	-59.5483	13	7	3.28479	0	0	0	0	0.963594	1	0.912104	1	FALSE	FALSE	FALSE
DPM1	1.92656e-07	1.30445e-06	-53.1889	-74.1376	13	7	29.7096	0	0	0	0	0.964084	1	0.223255	0.482942	FALSE	FALSE	FALSE
DRG1	0.00018761	0.000813522	-36.2844	-49.4838	13	7	8.13603	0	0	0	0	0.0153388	1	0.315542	0.605048	FALSE	FALSE	FALSE
DST	8.45996e-25	2.46721e-23	-73.2217	-136.278	13	7	169.133	0	0	0	0	0.081608	1	0.253171	0.525173	FALSE	FALSE	FALSE
DSTN	1.44475e-10	1.4718e-09	-52.4549	-81.2066	13	7	35.5638	0	0	0	0	0.461948	1	6.04978e-11	1.70849e-09	FALSE	TRUE	FALSE
DUSP11	4.96252e-24	1.38392e-22	-42.4639	-103.693	13	7	12.9922	0	0	0	0	1	1	2.27945e-05	0.000293957	FALSE	TRUE	FALSE
DUSP4	8.47237e-11	8.87411e-10	-20.5276	-49.851	13	7	2.4446	0	0	0	0	0.0005714	0.318698	0.0993469	0.283431	FALSE	FALSE	FALSE
DYNC2LI1	0.00124274	0.00447548	-41.1157	-52.0845	13	7	9.26353	0	0	0	0	0.792563	1	0.992537	1	FALSE	FALSE	FALSE
DYNLRB1	2.3578e-08	1.86534e-07	-39.2275	-62.4757	13	7	14.4065	0	0	0	0	0.0727111	1	0.185301	0.427293	FALSE	FALSE	FALSE
DYNLT1	0.00146592	0.00518251	-30.5694	-41.3399	13	7	6.88115	0	0	0	0	0.185715	1	0.11104	0.307163	FALSE	FALSE	FALSE
EBF1	1.3823e-08	1.13588e-07	-29.0843	-52.9138	13	7	4.21457	0	0	0	0	0.870487	1	0.813209	0.994392	FALSE	FALSE	FALSE
EBPL	2.74736e-236	1.22587e-232	-48.2678	-602.613	13	7	272.137	0	0	0	0	0.568426	1	6.38278e-16	2.76505e-14	FALSE	TRUE	FALSE
ECE1	0.000907232	0.00336498	-18.2685	-29.6135	13	7	1.80301	0	0	0	0	0.944125	1	0.246856	0.516475	FALSE	FALSE	FALSE
ECH1	0.000115402	0.000524364	-45.1622	-58.9249	13	7	22.7274	0	0	0	0	1	1	4.58462e-06	6.81886e-05	FALSE	TRUE	FALSE
ECI1	5.27839e-06	2.94771e-05	-36.0875	-53.36	13	7	9.15864	0	0	0	0	0.952191	1	0.00494829	0.0307568	FALSE	FALSE	FALSE
ECPAS	0.00295185	0.00965278	-34.3234	-44.2455	13	7	8.74513	0	0	0	0	0.976648	1	0.00258587	0.0178058	FALSE	FALSE	FALSE
EDRF1	3.92174e-18	7.29116e-17	-31.0406	-78.1759	13	7	7.70843	0	0	0	0	0.626051	1	0.965491	1	FALSE	FALSE	FALSE
EEF1A1	2.8826e-82	5.59225e-80	-125.576	-323.219	13	7	6471.37	0	0	0	0	0.52848	1	1.09116e-19	6.24199e-18	FALSE	TRUE	FALSE
EEF1D	7.70663e-19	1.50162e-17	-54.0836	-102.915	13	7	68.9643	0	0	0	0	0.421177	1	1.92165e-05	0.000254367	FALSE	TRUE	FALSE
EEF1G	3.41763e-07	2.21972e-06	-75.5151	-95.8323	13	7	149.79	0	0	0	0	0.984632	1	0.000111037	0.00119098	FALSE	FALSE	FALSE
EGLN1	0.000452718	0.00180521	-21.4102	-33.5787	13	7	2.47145	0	0	0	0	0.999868	1	0.763741	0.97144	FALSE	FALSE	FALSE
EGR1	6.74119e-75	1.07426e-72	-58.4664	-238.961	13	7	444.546	0	0	0	0	1	1	8.38565e-95	4.6771e-92	FALSE	TRUE	FALSE
EHBP1	6.34916e-08	4.63665e-07	-39.2231	-61.3896	13	7	10.5052	0	0	0	0	0.912257	1	0.338133	0.631227	FALSE	FALSE	FALSE
EHD2	3.61952e-08	2.77974e-07	-20.5846	-43.3653	13	7	3.41959	0	0	0	0	0.389548	1	0.01883	0.0859975	FALSE	FALSE	FALSE
EHHADH	1.58812e-07	1.08851e-06	-35.8993	-57.0604	13	7	10.5578	0	0	0	0	1	1	0.525806	0.812395	FALSE	FALSE	FALSE
EI24	0.00168633	0.00586926	-31.6615	-42.2632	13	7	8.8403	0	0	0	0	0.54224	1	0.000266876	0.00257749	FALSE	FALSE	FALSE
EID1	8.61332e-09	7.26515e-08	-49.8144	-74.1578	13	7	35.0759	0	0	0	0	0.939658	1	3.00642e-08	6.38794e-07	FALSE	TRUE	FALSE
EIF1	3.95845e-08	3.01409e-07	-81.1296	-103.813	13	7	170.509	0	0	0	0	0.958609	1	0.000683229	0.00585138	FALSE	FALSE	FALSE
EIF1AY	0.00181122	0.00625514	-13.9329	-24.4484	13	7	1.59925	0	0	0	0	0.995448	1	0.0809225	0.2443	FALSE	FALSE	FALSE
EIF1B	0.000281336	0.0011732	-48.77	-61.4968	13	7	18.0444	0	0	0	0	0.771869	1	0.0339349	0.132358	FALSE	FALSE	FALSE
EIF2S1	0.000334043	0.00137247	-54.5647	-67.0905	13	7	23.2917	0	0	0	0	0.6599	1	0.832378	1	FALSE	FALSE	FALSE
EIF3A	5.24961e-23	1.37787e-21	-65.6556	-124.446	13	7	99.3329	0	0	0	0	0.167932	1	0.991421	1	FALSE	FALSE	FALSE
EIF3D	0.00267576	0.00886358	-63.1484	-73.1904	13	7	56.0108	0	0	0	0	0.747724	1	0.540648	0.825588	FALSE	FALSE	FALSE
EIF3F	0.000117346	0.000532651	-43.6146	-57.358	13	7	16.1088	0	0	0	0	0.194093	1	0.0413977	0.15255	FALSE	FALSE	FALSE
EIF3K	2.12636e-09	1.89378e-08	-50.8136	-76.6719	13	7	45.2892	0	0	0	0	0.0525939	1	2.50936e-10	6.74505e-09	FALSE	TRUE	FALSE
EIF3M	1.18563e-24	3.43525e-23	-63.3458	-126.053	13	7	104.101	0	0	0	0	0.258103	1	0.346489	0.641774	FALSE	FALSE	FALSE
EIF4A1	0.000170647	0.000747088	-50.1022	-63.4116	13	7	34.3561	0	0	0	0	0.202914	1	1.82063e-06	2.96484e-05	FALSE	TRUE	FALSE
EIF5B	0.000643224	0.00246781	-65.8582	-77.6118	13	7	68.8737	0	0	0	0	0.325374	1	0.00231361	0.0162317	FALSE	FALSE	FALSE
ELF1	2.04946e-12	2.47175e-11	-53.7165	-87.0074	13	7	30.774	0	0	0	0	0.941307	1	0.0500722	0.174276	FALSE	FALSE	FALSE
ELL2	2.33129e-06	1.37232e-05	-34.5837	-52.7709	13	7	8.21662	0	0	0	0	0.0338633	1	0.146419	0.366038	FALSE	FALSE	FALSE
ELP4	1.47076e-135	1.31251e-132	-41.2009	-362.522	13	7	57.2746	0	0	0	0	0.996927	1	0.166856	0.397496	FALSE	FALSE	FALSE
EMP2	0.000423967	0.00170735	-26.2588	-38.5045	13	7	5.16684	0	0	0	0	1	1	6.02991e-05	0.00070618	FALSE	TRUE	FALSE
ENAH	5.42812e-08	4.02999e-07	-36.6062	-58.9441	13	7	8.75437	0	0	0	0	0.99992	1	0.0225934	0.0986415	FALSE	FALSE	FALSE
ENO1	3.16383e-31	1.24929e-29	-81.1369	-159.418	13	7	283.594	0	0	0	0	0.364396	1	3.69175e-07	6.56278e-06	FALSE	TRUE	FALSE
ENO3	6.4558e-11	6.85852e-10	-29.2828	-58.8971	13	7	6.42342	0	0	0	0	0.492428	1	0.946482	1	FALSE	FALSE	FALSE
ENOSF1	0.00133351	0.00477155	-20.3359	-31.2202	13	7	1.88812	0	0	0	0	0.99996	1	0.670178	0.919664	FALSE	FALSE	FALSE
ENSA	6.09998e-06	3.36858e-05	-42.2288	-59.3389	13	7	9.66401	0	0	0	0	0.748084	1	0.966338	1	FALSE	FALSE	FALSE
EOGT	2.99264e-50	2.56792e-48	-33.8625	-156.843	13	7	19.0105	0	0	0	0	0.574328	1	0.154045	0.376432	FALSE	FALSE	FALSE
EPCAM	2.24522e-31	9.0254e-30	-62.3761	-141.009	13	7	108.423	0	0	0	0	0.0112932	1	0.477703	0.772566	FALSE	FALSE	FALSE
EPHA2	4.5704e-11	4.91401e-10	-31.3861	-61.3697	13	7	8.62795	0	0	0	0	0.999876	1	0.0216363	0.0953236	FALSE	FALSE	FALSE
EPHA4	1.11544e-16	1.92166e-15	-26.3305	-69.9671	13	7	11.5776	0	0	0	0	0.999989	1	1.82268e-14	7.39344e-13	FALSE	TRUE	FALSE
EPHX1	4.87071e-36	2.49806e-34	-43.6056	-133.236	13	7	35.1561	0	0	0	0	1	1	3.45755e-12	1.05669e-10	FALSE	TRUE	FALSE
EPRS1	0.00195113	0.0066661	-46.5437	-56.9693	13	7	16.4488	0	0	0	0	0.998832	1	0.862988	1	FALSE	FALSE	FALSE
EPS8	3.47393e-13	4.57247e-12	-37.3111	-72.4837	13	7	13.102	0	0	0	0	0.940462	1	0.999954	1	FALSE	FALSE	FALSE
ERCC2	0.000365242	0.00149104	-30.7987	-43.2197	13	7	5.97271	0	0	0	0	0.839422	1	0.381195	0.679813	FALSE	FALSE	FALSE
ERP29	3.26931e-12	3.89004e-11	-45.4487	-78.2435	13	7	23.5745	0	0	0	0	0.569798	1	0.00163035	0.0123508	FALSE	FALSE	FALSE
ETAA1	0.00198595	0.00675921	-38.9243	-49.3284	13	7	9.94934	0	0	0	0	0.985383	1	0.56045	0.840333	FALSE	FALSE	FALSE
ETFA	6.6156e-08	4.80763e-07	-57.2576	-79.3791	13	7	57.0113	0	0	0	0	0.960655	1	0.10683	0.298532	FALSE	FALSE	FALSE
EXOSC10	0.00138597	0.00493158	-37.551	-48.389	13	7	11.2062	0	0	0	0	0.896221	1	0.170765	0.404435	FALSE	FALSE	FALSE
EXOSC5	0.000521513	0.00205383	-34.5515	-46.5531	13	7	5.91565	0	0	0	0	0.92321	1	0.911368	1	FALSE	FALSE	FALSE
EXOSC9	2.63064e-05	0.000131887	-66.0551	-81.513	13	7	70.1509	0	0	0	0	0.999755	1	0.818489	0.996752	FALSE	FALSE	FALSE
EXT1	0.000109281	0.000499602	-38.5842	-52.4099	13	7	7.91004	0	0	0	0	1	1	2.08239e-06	3.34361e-05	FALSE	TRUE	FALSE
EXT2	6.37536e-05	0.000301025	-43.4433	-57.8896	13	7	15.1682	0	0	0	0	0.707049	1	0.335017	0.627822	FALSE	FALSE	FALSE
EXTL2	2.51399e-07	1.66184e-06	-72.2507	-92.9065	13	7	87.6671	0	0	0	0	0.135836	1	0.0668496	0.21413	FALSE	FALSE	FALSE
EZR	3.44844e-40	1.99831e-38	-40.595	-139.986	13	7	26.2986	0	0	0	0	0.776532	1	0.8201	0.99708	FALSE	FALSE	FALSE
F2R	0.0019315	0.00660409	-13.8655	-24.3032	13	7	1.8228	0	0	0	0	1	1	0.0414025	0.15255	FALSE	FALSE	FALSE
FADS2	5.86356e-08	4.31736e-07	-16.7511	-39.0046	13	7	2.73594	0	0	0	0	0.220301	1	0.357746	0.655011	FALSE	FALSE	FALSE
FADS3	9.91396e-05	0.000460792	-28.9919	-42.93	13	7	5.63908	0	0	0	0	0.414321	1	0.816517	0.995793	FALSE	FALSE	FALSE
FAF1	0.00188028	0.00644875	-17.8316	-28.3019	13	7	1.76724	0	0	0	0	1	1	1	1	FALSE	FALSE	FALSE
FAM162A	2.6688e-22	6.57911e-21	-54.2535	-111.36	13	7	57.572	0	0	0	0	0.614093	1	0.000141487	0.00147504	FALSE	FALSE	FALSE
FAM200A	1.03622e-09	9.65266e-09	-42.0369	-68.6708	13	7	15.0993	0	0	0	0	0.248174	1	5.43491e-19	2.92175e-17	FALSE	TRUE	FALSE
FAM200B	4.45104e-06	2.51399e-05	-39.0937	-56.5575	13	7	9.9672	0	0	0	0	0.882541	1	0.0538468	0.183548	FALSE	FALSE	FALSE
FAM204A	1.25884e-10	1.29423e-09	-43.519	-72.4183	13	7	19.2712	0	0	0	0	0.889365	1	0.903507	1	FALSE	FALSE	FALSE
FAM20C	2.34168e-10	2.33749e-09	-19.6524	-47.8861	13	7	2.97825	0	0	0	0	0.99987	1	0.988222	1	FALSE	FALSE	FALSE
FAM216A	0.000950989	0.00350108	-39.7524	-51.0412	13	7	10.6861	0	0	0	0	0.534474	1	0.69658	0.934498	FALSE	FALSE	FALSE
FAM78A	9.29683e-09	7.79746e-08	-16.6805	-40.941	13	7	1.78861	0	0	0	0	0.33794	1	0.162147	0.389818	FALSE	FALSE	FALSE
FAU	6.8335e-09	5.79679e-08	-61.9491	-86.5437	13	7	68.9424	0	0	0	0	0.898782	1	0.00752989	0.042746	FALSE	FALSE	FALSE
FBL	2.97853e-05	0.000147669	-52.614	-67.9305	13	7	37.4879	0	0	0	0	0.999997	1	2.03128e-05	0.000264244	FALSE	TRUE	FALSE
FBLIM1	8.29742e-21	1.75465e-19	-33.6403	-87.1838	13	7	11.5733	0	0	0	0	0.865195	1	0.652623	0.907666	FALSE	FALSE	FALSE
FBN3	1.69624e-09	1.53834e-08	-19.8477	-45.95	13	7	3.65759	0	0	0	0	1	1	1	1	FALSE	FALSE	FALSE
FBXW7	0.000193476	0.00083571	-29.2292	-42.3927	13	7	6.91916	0	0	0	0	0.994566	1	0.646914	0.904018	FALSE	FALSE	FALSE
FCGRT	8.06638e-05	0.000376545	-21.8533	-36.0291	13	7	2.53612	0	0	0	0	0.741353	1	0.632917	0.894122	FALSE	FALSE	FALSE
FCHO2	1.41559e-13	1.91986e-12	-30.7424	-66.8645	13	7	6.28791	0	0	0	0	0.852716	1	0.992463	1	FALSE	FALSE	FALSE
FDFT1	2.80408e-06	1.62702e-05	-36.3713	-54.3522	13	7	11.1751	0	0	0	0	0.987752	1	0.000322508	0.00300424	FALSE	FALSE	FALSE
FGGY	3.49924e-09	3.04359e-08	-27.722	-53.0417	13	7	5.42841	0	0	0	0	0.981264	1	0.630724	0.893425	FALSE	FALSE	FALSE
FHL1	0.00272908	0.00900011	-22.5332	-32.5511	13	7	2.95935	0	0	0	0	0.29391	1	0.0771213	0.236019	FALSE	FALSE	FALSE
FILIP1L	0.000235147	0.000996415	-25.0574	-37.9937	13	7	2.80286	0	0	0	0	0.816853	1	0.958782	1	FALSE	FALSE	FALSE
FKBP10	2.07718e-05	0.000105924	-31.9989	-47.7252	13	7	9.59004	0	0	0	0	0.999959	1	0.00471779	0.0296908	FALSE	FALSE	FALSE
FKBP8	0.000732329	0.00277625	-41.2088	-52.8085	13	7	13.6897	0	0	0	0	0.155442	1	0.761396	0.970117	FALSE	FALSE	FALSE
FLOT1	6.01144e-16	9.86142e-15	-46.8271	-88.6986	13	7	22.7951	0	0	0	0	0.992003	1	8.30718e-05	0.000933669	FALSE	TRUE	FALSE
FLRT3	5.9389e-08	4.36563e-07	-23.2522	-45.4918	13	7	4.19692	0	0	0	0	0.766328	1	0.779035	0.98001	FALSE	FALSE	FALSE
FMN2	1.71501e-08	1.38882e-07	-23.6979	-47.2928	13	7	4.40168	0	0	0	0	1	1	1	1	FALSE	FALSE	FALSE
FN1	9.62106e-46	6.81415e-44	-62.4952	-174.919	13	7	111.75	0	0	0	0	0.144966	1	0.870658	1	FALSE	FALSE	FALSE
FNBP4	1.90262e-11	2.10657e-10	-51.0839	-82.0033	13	7	32.5855	0	0	0	0	0.30855	1	0.0123262	0.0632472	FALSE	FALSE	FALSE
FNDC3A	6.1147e-20	1.24583e-18	-31.2091	-82.6778	13	7	16.4368	0	0	0	0	1	1	3.39439e-31	3.88353e-29	FALSE	TRUE	FALSE
FNIP2	0.00081122	0.00304685	-24.4103	-35.8884	13	7	3.57352	0	0	0	0	0.998427	1	0.528961	0.815277	FALSE	FALSE	FALSE
FOLR1	0.000249231	0.00105309	-22.3556	-35.224	13	7	2.67044	0	0	0	0	0.606248	1	0.577129	0.84912	FALSE	FALSE	FALSE
FRMD6	0.000670641	0.00256638	-30.8627	-42.5669	13	7	7.42722	0	0	0	0	0.990613	1	0.0491063	0.172123	FALSE	FALSE	FALSE
FSCN1	1.37873e-05	7.21208e-05	-16.8063	-32.997	13	7	2.25121	0	0	0	0	0.56283	1	0.411857	0.712289	FALSE	FALSE	FALSE
FSTL3	0.00269549	0.0089157	-19.4234	-29.4564	13	7	1.98188	0	0	0	0	0.464884	1	0.402622	0.702748	FALSE	FALSE	FALSE
FSTL5	9.0943e-36	4.55941e-34	-28.433	-117.425	13	7	14.4724	0	0	0	0	0.999957	1	0.646587	0.903844	FALSE	FALSE	FALSE
FTSJ3	3.0457e-07	1.99558e-06	-55.2747	-75.719	13	7	36.3416	0	0	0	0	0.158968	1	9.33668e-07	1.57804e-05	FALSE	TRUE	FALSE
FUOM	1.54541e-10	1.56718e-09	-24.8439	-53.5234	13	7	5.38419	0	0	0	0	1	1	1	1	FALSE	FALSE	FALSE
FYN	6.0358e-12	6.97713e-11	-13.8331	-45.9759	13	7	2.49514	0	0	0	0	0.528828	1	2.69613e-18	1.36706e-16	FALSE	TRUE	FALSE
G6PD	0.00144981	0.00513008	-50.122	-60.9058	13	7	39.5468	0	0	0	0	0.922428	1	1.49213e-09	3.69883e-08	FALSE	TRUE	FALSE
GABRA2	1.62289e-07	1.11064e-06	-28.6869	-49.8242	13	7	4.36041	0	0	0	0	0.900618	1	0.549844	0.830255	FALSE	FALSE	FALSE
GADD45B	2.35017e-10	2.34073e-09	-33.0713	-61.3011	13	7	14.4437	0	0	0	0	0.534029	1	0.933765	1	FALSE	FALSE	FALSE
GAPVD1	7.24817e-05	0.00033972	-32.3176	-46.6164	13	7	7.9255	0	0	0	0	0.7585	1	0.573405	0.846864	FALSE	FALSE	FALSE
GATD1	0.000444325	0.00177636	-18.1875	-30.378	13	7	2.13803	0	0	0	0	0.592507	1	0.186679	0.430027	FALSE	FALSE	FALSE
GBE1	0.000504683	0.00199186	-30.4338	-42.4742	13	7	6.11569	0	0	0	0	0.939649	1	0.0134645	0.0678855	FALSE	FALSE	FALSE
GBP1	3.84744e-37	2.01968e-35	-26.9182	-119.143	13	7	9.55833	0	0	0	0	0.755514	1	0.729714	0.953759	FALSE	FALSE	FALSE
GCA	1.5444e-09	1.41211e-08	-22.7767	-48.9802	13	7	2.93819	0	0	0	0	1	1	9.39581e-14	3.4364e-12	FALSE	TRUE	FALSE
GDE1	0.000429155	0.00172357	-41.0079	-53.2394	13	7	12.0315	0	0	0	0	0.572727	1	0.0266631	0.111303	FALSE	FALSE	FALSE
GDF15	0.0029053	0.00955302	-30.4172	-40.3587	13	7	4.25684	0	0	0	0	0.565604	1	0.64205	0.900606	FALSE	FALSE	FALSE
GGH	3.8404e-05	0.000187073	-32.0615	-47.088	13	7	6.08356	0	0	0	0	0.694218	1	0.0793529	0.24103	FALSE	FALSE	FALSE
GGNBP2	6.56078e-06	3.6052e-05	-66.7137	-83.7419	13	7	61.8919	0	0	0	0	0.38737	1	0.632705	0.894122	FALSE	FALSE	FALSE
GHITM	5.97216e-09	5.08545e-08	-64.61	-89.3507	13	7	77.9158	0	0	0	0	0.88137	1	0.19093	0.436884	FALSE	FALSE	FALSE
GID4	0.000585004	0.00226588	-28.0557	-39.9216	13	7	3.61642	0	0	0	0	0.512427	1	0.0182854	0.0841128	FALSE	FALSE	FALSE
GIGYF2	0.000367684	0.00149964	-42.3704	-54.7836	13	7	11.0592	0	0	0	0	1	1	5.33094e-08	1.06422e-06	FALSE	TRUE	FALSE
GINS2	0.00053748	0.00210741	-17.9545	-29.9206	13	7	2.29723	0	0	0	0	0.159297	1	0.132296	0.343609	FALSE	FALSE	FALSE
GLA	0.0024662	0.00822435	-39.7546	-49.8958	13	7	9.32015	0	0	0	0	0.0504557	1	0.0693447	0.220225	FALSE	FALSE	FALSE
GLB1L3	0.000571847	0.0022207	-23.5681	-35.4609	13	7	2.54559	0	0	0	0	0.25626	1	0.0643284	0.209267	FALSE	FALSE	FALSE
GLIPR1	6.41656e-10	6.04023e-09	-30.4672	-57.6174	13	7	6.56179	0	0	0	0	0.257274	1	0.0563468	0.189608	FALSE	FALSE	FALSE
GLRX	5.22299e-11	5.60216e-10	-23.0362	-52.8772	13	7	6.3726	0	0	0	0	0.999843	1	1.12745e-06	1.88415e-05	FALSE	TRUE	FALSE
GNG10	2.06144e-13	2.75393e-12	-45.1682	-80.8929	13	7	24.2644	0	0	0	0	0.97833	1	0.181875	0.422252	FALSE	FALSE	FALSE
GNG11	1.21022e-15	1.92171e-14	-38.6981	-79.8353	13	7	16.6486	0	0	0	0	0.948524	1	2.50091e-06	3.9712e-05	FALSE	TRUE	FALSE
GOLGA4	3.64342e-11	3.95546e-10	-84.8465	-115.072	13	7	255.95	0	0	0	0	0.477188	1	0.000154161	0.00158495	FALSE	FALSE	FALSE
GOLM1	2.48271e-19	4.96765e-18	-31.8866	-81.8976	13	7	10.8293	0	0	0	0	0.999962	1	0.51966	0.807635	FALSE	FALSE	FALSE
GORASP2	0.00198478	0.00675921	-28.1091	-38.5139	13	7	4.87732	0	0	0	0	1	1	0.0300363	0.120814	FALSE	FALSE	FALSE
GPAA1	0.000444687	0.00177636	-53.9499	-66.1394	13	7	37.7886	0	0	0	0	0.308752	1	0.00026791	0.00258189	FALSE	FALSE	FALSE
GPATCH1	0.000235526	0.000997076	-32.5999	-45.5343	13	7	6.10655	0	0	0	0	0.791886	1	0.0390122	0.146402	FALSE	FALSE	FALSE
GPATCH3	5.66263e-208	1.26333e-204	-47.0793	-535.978	13	7	200.416	0	0	0	0	0.999873	1	0.754148	0.967471	FALSE	FALSE	FALSE
GPBP1	7.10952e-05	0.000333572	-63.517	-77.8381	13	7	96.367	0	0	0	0	0.335873	1	4.42082e-29	4.48311e-27	FALSE	TRUE	FALSE
GPC4	9.89125e-13	1.23627e-11	-23.8272	-57.8912	13	7	5.57985	0	0	0	0	1	1	1	1	FALSE	FALSE	FALSE
GPNMB	1.61879e-21	3.61153e-20	-33.5473	-88.7863	13	7	12.7254	0	0	0	0	0.918037	1	0.705026	0.939615	FALSE	FALSE	FALSE
GPT2	4.52802e-08	3.40709e-07	-29.4369	-51.9731	13	7	6.44633	0	0	0	0	0.99992	1	0.455389	0.753689	FALSE	FALSE	FALSE
GPX1	4.58717e-06	2.5876e-05	-36.2933	-53.7233	13	7	12.0793	0	0	0	0	0.106894	1	0.0202657	0.0908877	FALSE	FALSE	FALSE
GRIK2	0.0001142	0.000519428	-21.5735	-35.3483	13	7	2.39637	0	0	0	0	0.238267	1	0.68287	0.926411	FALSE	FALSE	FALSE
GRINA	2.55292e-10	2.53137e-09	-29.0317	-57.1727	13	7	6.20229	0	0	0	0	0.940758	1	0.0140932	0.0698221	FALSE	FALSE	FALSE
GRN	4.76958e-24	1.34695e-22	-59.0111	-120.281	13	7	83.1521	0	0	0	0	0.943216	1	1.40386e-08	3.08573e-07	FALSE	TRUE	FALSE
GRSF1	0.00229625	0.0077269	-41.827	-52.0551	13	7	10.5894	0	0	0	0	0.577559	1	0.0654882	0.211592	FALSE	FALSE	FALSE
GSK3B	1.37429e-13	1.86953e-12	-47.7638	-83.9171	13	7	24.876	0	0	0	0	0.729405	1	8.86746e-22	5.99494e-20	FALSE	TRUE	FALSE
GSS	0.000288356	0.00119911	-37.6417	-50.3397	13	7	8.34087	0	0	0	0	0.0368546	1	0.326147	0.616027	FALSE	FALSE	FALSE
GSTP1	6.23266e-05	0.000295224	-70.4033	-84.8755	13	7	87.8822	0	0	0	0	0.986868	1	4.09306e-08	8.42066e-07	FALSE	TRUE	FALSE
GTF2A1	0.000143001	0.000636163	-39.9623	-53.4769	13	7	12.733	0	0	0	0	0.763085	1	0.000229452	0.00228021	FALSE	FALSE	FALSE
GTF2B	9.55738e-13	1.20127e-11	-71.3069	-105.407	13	7	112.165	0	0	0	0	0.0353189	1	0.628941	0.892997	FALSE	FALSE	FALSE
GTF2F2	1.32778e-05	6.97004e-05	-33.7989	-50.0323	13	7	6.77813	0	0	0	0	0.118792	1	0.0309114	0.123812	FALSE	FALSE	FALSE
GTF2H5	5.33523e-05	0.000255427	-36.0065	-50.657	13	7	9.01953	0	0	0	0	0.572159	1	0.267372	0.547255	FALSE	FALSE	FALSE
GTF3C6	1.3042e-13	1.77961e-12	-41.3686	-77.5773	13	7	20.2148	0	0	0	0	0.5685	1	0.010372	0.0548342	FALSE	FALSE	FALSE
GUF1	7.26997e-23	1.87506e-21	-70.0419	-128.495	13	7	119.35	0	0	0	0	0.999778	1	0.0522328	0.179479	FALSE	FALSE	FALSE
GUK1	9.91215e-07	6.10041e-06	-47.3381	-66.477	13	7	23.5834	0	0	0	0	0.0644419	1	0.0021916	0.0155964	FALSE	FALSE	FALSE
H2AJ	1.02565e-10	1.06429e-09	-24.1199	-53.2387	13	7	5.62387	0	0	0	0	0.999935	1	0.651322	0.906864	FALSE	FALSE	FALSE
H2AZ2	5.27849e-13	6.8467e-12	-52.0592	-86.7887	13	7	48.8951	0	0	0	0	0.999998	1	6.85929e-07	1.17265e-05	FALSE	TRUE	FALSE
HACD1	7.13494e-10	6.68826e-09	-46.8058	-73.8418	13	7	20.4228	0	0	0	0	0.735653	1	0.000996545	0.00807003	FALSE	FALSE	FALSE
HADHB	0.00163445	0.00570651	-37.6419	-48.2814	13	7	10.0477	0	0	0	0	0.759105	1	0.479761	0.774492	FALSE	FALSE	FALSE
HARS1	1.20517e-08	9.93988e-08	-37.1991	-61.1776	13	7	7.1274	0	0	0	0	0.998894	1	9.97764e-06	0.000138692	FALSE	TRUE	FALSE
HAVCR1	3.17062e-72	4.42103e-70	-58.142	-232.414	13	7	121.941	0	0	0	0	0.959086	1	0.0871469	0.257346	FALSE	FALSE	FALSE
HBEGF	0.00239119	0.00800413	-39.7164	-49.8952	13	7	10.0966	0	0	0	0	0.0593823	1	0.15204	0.373777	FALSE	FALSE	FALSE
HDAC5	1.23497e-05	6.54447e-05	-43.2801	-59.5953	13	7	15.5345	0	0	0	0	0.732172	1	0.924967	1	FALSE	FALSE	FALSE
HDGFL2	3.79605e-30	1.37707e-28	-40.0555	-115.787	13	7	16.1792	0	0	0	0	0.957385	1	0.208332	0.463167	FALSE	FALSE	FALSE
HDLBP	2.66523e-05	0.000133471	-50.2272	-65.6701	13	7	33.6007	0	0	0	0	1	1	5.22979e-06	7.65092e-05	FALSE	TRUE	FALSE
HEATR1	3.85565e-05	0.000187611	-33.8725	-48.8946	13	7	7.11478	0	0	0	0	0.572598	1	0.898769	1	FALSE	FALSE	FALSE
HEBP2	1.40493e-05	7.3319e-05	-33.7479	-49.9174	13	7	8.12181	0	0	0	0	0.682141	1	0.202168	0.454216	FALSE	FALSE	FALSE
HERC5	1.50026e-64	1.80923e-62	-28.6367	-185.021	13	7	37.262	0	0	0	0	1	1	3.23109e-101	2.05959e-98	FALSE	TRUE	FALSE
HERC6	2.57729e-12	3.08308e-11	-22.7185	-55.766	13	7	3.83224	0	0	0	0	1	1	4.04407e-18	2.02749e-16	FALSE	TRUE	FALSE
HEXB	0.000404872	0.00163636	-47.0198	-59.3197	13	7	24.03	0	0	0	0	0.790367	1	0.0167084	0.0789757	FALSE	FALSE	FALSE
HK1	4.79674e-05	0.000231886	-21.5326	-36.305	13	7	3.185	0	0	0	0	1	1	0.00324666	0.0216541	FALSE	FALSE	FALSE
HKDC1	1.94056e-12	2.35934e-11	-21.6427	-54.9915	13	7	4.76797	0	0	0	0	1	1	1	1	FALSE	FALSE	FALSE
HLA-F	8.85952e-15	1.32211e-13	-17.3641	-56.4088	13	7	2.78605	0	0	0	0	1	1	1.70612e-06	2.79879e-05	FALSE	TRUE	FALSE
HLTF	1.27716e-07	8.84888e-07	-33.4437	-54.8442	13	7	7.52118	0	0	0	0	0.411588	1	0.988939	1	FALSE	FALSE	FALSE
HM13	0.000201293	0.000864381	-44.3885	-57.5059	13	7	19.571	0	0	0	0	0.17395	1	0.0232543	0.100543	FALSE	FALSE	FALSE
HMGA1	4.0629e-09	3.493e-08	-47.4555	-72.6135	13	7	20.3415	0	0	0	0	0.977091	1	0.238142	0.504074	FALSE	FALSE	FALSE
HMGB2	4.02484e-09	3.46696e-08	-53.2476	-78.4158	13	7	34.7908	0	0	0	0	0.97999	1	0.0975685	0.279429	FALSE	FALSE	FALSE
HMGCS1	0.000201469	0.000864381	-24.1088	-37.2252	13	7	2.96542	0	0	0	0	0.576241	1	0.0703792	0.22208	FALSE	FALSE	FALSE
HMGN1	0.000681635	0.00260398	-48.24	-59.9249	13	7	19.2992	0	0	0	0	0.576359	1	0.104592	0.294441	FALSE	FALSE	FALSE
HMGN4	3.24857e-07	2.12227e-06	-42.9219	-63.2951	13	7	12.2044	0	0	0	0	0.842168	1	0.979119	1	FALSE	FALSE	FALSE
HMMR	2.92502e-08	2.28571e-07	-41.9702	-64.9834	13	7	13.0681	0	0	0	0	0.999322	1	0.241574	0.509166	FALSE	FALSE	FALSE
HMOX1	0.00202802	0.00689713	-27.5257	-37.9045	13	7	4.44415	0	0	0	0	0.999936	1	0.000193411	0.00193933	FALSE	FALSE	FALSE
HNF1B	8.96057e-08	6.34636e-07	-20.4293	-42.2185	13	7	3.43208	0	0	0	0	0.574779	1	0.269643	0.549132	FALSE	FALSE	FALSE
HNRNPA1	5.69769e-22	1.33806e-20	-67.5827	-123.904	13	7	99.2607	0	0	0	0	0.948596	1	0.221961	0.481404	FALSE	FALSE	FALSE
HNRNPDL	3.58319e-06	2.03931e-05	-46.5578	-64.2646	13	7	23.6747	0	0	0	0	0.837839	1	0.507797	0.796691	FALSE	FALSE	FALSE
HNRNPH3	0.00226511	0.00763364	-45.683	-55.9277	13	7	19.0889	0	0	0	0	0.827892	1	0.619213	0.884987	FALSE	FALSE	FALSE
HNRNPL	2.82427e-30	1.03294e-28	-38.2089	-114.244	13	7	25.1044	0	0	0	0	1	1	0.0194019	0.0878463	FALSE	FALSE	FALSE
HOOK1	0.000109605	0.000500573	-22.416	-36.2383	13	7	2.83853	0	0	0	0	1	1	1	1	FALSE	FALSE	FALSE
HPCAL1	6.23514e-06	3.43471e-05	-22.0045	-39.0899	13	7	3.20715	0	0	0	0	0.982023	1	0.0390995	0.146484	FALSE	FALSE	FALSE
HPGD	0.000259901	0.00109404	-17.753	-30.5725	13	7	2.05926	0	0	0	0	0.585333	1	0.100512	0.286022	FALSE	FALSE	FALSE
HSBP1L1	1.27797e-05	6.74827e-05	-32.4349	-48.7114	13	7	10.5502	0	0	0	0	0.99998	1	0.00153812	0.0117318	FALSE	FALSE	FALSE
HSCB	7.7584e-22	1.80302e-20	-48.6308	-104.632	13	7	32.9566	0	0	0	0	0.00349162	1	1.98462e-43	3.54214e-41	FALSE	TRUE	FALSE
HSD17B10	3.318e-06	1.90295e-05	-32.5746	-50.3673	13	7	9.89358	0	0	0	0	1	1	0.00860458	0.0478128	FALSE	FALSE	FALSE
HSDL2	4.50491e-22	1.07405e-20	-60.2284	-116.793	13	7	82.8833	0	0	0	0	0.993545	1	0.804474	0.989133	FALSE	FALSE	FALSE
HSP90AB1	1.99233e-18	3.78287e-17	-66.6079	-114.45	13	7	105.227	0	0	0	0	0.333881	1	9.26003e-11	2.58239e-09	FALSE	TRUE	FALSE
HSP90B1	1.28656e-22	3.28035e-21	-59.3411	-117.204	13	7	78.1699	0	0	0	0	1	1	3.97734e-09	9.38989e-08	FALSE	TRUE	FALSE
HSPA4	4.97072e-07	3.16848e-06	-58.4625	-78.366	13	7	57.4886	0	0	0	0	0.941976	1	0.944008	1	FALSE	FALSE	FALSE
HSPA5	1.40931e-42	8.73383e-41	-94.3989	-199.398	13	7	763.293	0	0	0	0	0.999958	1	9.68155e-17	4.36354e-15	FALSE	TRUE	FALSE
HSPA8	1.78965e-13	2.39802e-12	-79.8235	-115.698	13	7	295.674	0	0	0	0	6.52534e-07	0.0014558	1.69186e-16	7.47432e-15	FALSE	TRUE	FALSE
HSPA9	3.49395e-09	3.04359e-08	-61.5626	-86.8839	13	7	60.2833	0	0	0	0	0.599772	1	0.335976	0.628815	FALSE	FALSE	FALSE
HSPB1	1.47071e-05	7.6573e-05	-56.0316	-72.1492	13	7	38.0204	0	0	0	0	0.305851	1	1.76912e-05	0.000235637	FALSE	TRUE	FALSE
HSPB11	4.6057e-38	2.47598e-36	-41.1689	-135.563	13	7	20.459	0	0	0	0	0.56165	1	0.99532	1	FALSE	FALSE	FALSE
HSPD1	4.39604e-21	9.43034e-20	-63.5118	-117.715	13	7	89.5327	0	0	0	0	0.53589	1	3.21084e-15	1.36445e-13	FALSE	TRUE	FALSE
HSPH1	2.47229e-09	2.18011e-08	-40.2926	-65.9879	13	7	11.0963	0	0	0	0	0.978814	1	0.095988	0.27609	FALSE	FALSE	FALSE
HTATIP2	0.000846188	0.00316222	-18.6418	-30.0698	13	7	1.6554	0	0	0	0	0.986189	1	0.0541118	0.18431	FALSE	FALSE	FALSE
HTATSF1	2.85039e-05	0.000141947	-36.3718	-51.7383	13	7	11.8548	0	0	0	0	0.568281	1	0.0168004	0.0792423	FALSE	FALSE	FALSE
HYAL1	0.000108245	0.00049588	-24.0762	-37.9129	13	7	3.19912	0	0	0	0	0.46607	1	0.279985	0.562491	FALSE	FALSE	FALSE
IAH1	1.08762e-05	5.8259e-05	-45.9349	-62.3937	13	7	17.4364	0	0	0	0	0.100509	1	0.216715	0.474243	FALSE	FALSE	FALSE
ID3	1.10126e-33	4.81748e-32	-31.6901	-115.773	13	7	21.6664	0	0	0	0	0.32689	1	6.52645e-19	3.38617e-17	FALSE	TRUE	FALSE
IDNK	1.25512e-06	7.59884e-06	-27.1587	-46.0355	13	7	3.30073	0	0	0	0	0.985042	1	0.729872	0.953759	FALSE	FALSE	FALSE
IER2	6.76269e-13	8.62146e-12	-38.8569	-73.3239	13	7	16.3581	0	0	0	0	0.976081	1	2.54526e-31	2.98867e-29	FALSE	TRUE	FALSE
IER3	7.73503e-11	8.12087e-10	-34.0622	-63.4831	13	7	11.4549	0	0	0	0	0.999929	1	0.0593381	0.197587	FALSE	FALSE	FALSE
IFI27L2	2.69662e-08	2.1221e-07	-38.0169	-61.1187	13	7	14.2137	0	0	0	0	0.626805	1	0.0231052	0.10019	FALSE	FALSE	FALSE
IFI44	4.52616e-07	2.90586e-06	-40.2296	-60.2367	13	7	25.5559	0	0	0	0	0.695529	1	7.93577e-28	7.37696e-26	FALSE	TRUE	FALSE
IFI6	3.66464e-22	8.83872e-21	-28.4151	-85.1937	13	7	6.79698	0	0	0	0	0.133289	1	2.4057e-11	7.01584e-10	FALSE	TRUE	FALSE
IFIH1	2.83497e-54	2.63534e-52	-42.0205	-174.412	13	7	105.176	0	0	0	0	0.00296098	1	1.46939e-111	1.09273e-108	FALSE	TRUE	FALSE
IFIT1	1.99087e-43	1.28743e-41	-35.8694	-142.863	13	7	28.3006	0	0	0	0	0.0545926	1	1.09077e-45	2.02792e-43	FALSE	TRUE	FALSE
IFIT2	1.29482e-95	4.81459e-93	-70.2916	-298.959	13	7	3087.06	0	0	0	0	0.991484	1	1.62994e-128	2.42426e-125	FALSE	TRUE	FALSE
IFIT3	1.02084e-17	1.84413e-16	-60.3416	-106.478	13	7	193.846	0	0	0	0	0.952927	1	4.43032e-67	1.23551e-64	FALSE	TRUE	FALSE
IFIT5	2.13072e-16	3.60114e-15	-21.8488	-64.8075	13	7	5.96143	0	0	0	0	0.529692	1	1.73725e-22	1.21119e-20	FALSE	TRUE	FALSE
IFNB1	3.643e-64	4.27764e-62	-25.7194	-181.205	13	7	34.7484	0	0	0	0	0.972774	1	8.86612e-90	3.59642e-87	FALSE	TRUE	FALSE
IFRD1	1.85848e-05	9.56465e-05	-45.9122	-61.7647	13	7	23.3384	0	0	0	0	1	1	1.40124e-05	0.000189465	FALSE	TRUE	FALSE
IFRD2	0.000727638	0.00276082	-28.1761	-39.7835	13	7	4.13855	0	0	0	0	0.287833	1	0.624339	0.889463	FALSE	FALSE	FALSE
IFT74	4.87973e-58	5.06357e-56	-27.9182	-169.104	13	7	17.2504	0	0	0	0	0.483106	1	0.670791	0.919664	FALSE	FALSE	FALSE
IGBP1	0.00245358	0.0081884	-32.2921	-42.4396	13	7	5.5905	0	0	0	0	0.956306	1	0.98863	1	FALSE	FALSE	FALSE
IGFBP3	4.51514e-29	1.52625e-27	-54.9524	-128.14	13	7	55.9188	0	0	0	0	0.79476	1	0.835126	1	FALSE	FALSE	FALSE
IGFBP5	7.86466e-49	6.38038e-47	-51.1327	-170.79	13	7	77.5576	0	0	0	0	0.793639	1	4.54186e-09	1.06104e-07	FALSE	TRUE	FALSE
IGFBP7	0.000146454	0.000648293	-35.4428	-48.9297	13	7	6.66136	0	0	0	0	0.640555	1	0.937137	1	FALSE	FALSE	FALSE
IL1R1	1.31211e-15	2.07611e-14	-22.0959	-63.1483	13	7	5.55952	0	0	0	0	0.326718	1	6.45868e-19	3.38617e-17	FALSE	TRUE	FALSE
IL6	2.36233e-07	1.5709e-06	-37.5976	-58.3219	13	7	8.50144	0	0	0	0	0.999998	1	1.89748e-19	1.07172e-17	FALSE	TRUE	FALSE
ING3	8.52917e-08	6.06091e-07	-37.0555	-58.8988	13	7	7.94709	0	0	0	0	0.223405	1	0.694642	0.933644	FALSE	FALSE	FALSE
INHBA	7.39519e-16	1.19556e-14	-25.888	-67.5422	13	7	7.17559	0	0	0	0	0.44511	1	0.266791	0.546567	FALSE	FALSE	FALSE
INSIG1	1.42808e-12	1.7554e-11	-26.9642	-60.6385	13	7	5.85875	0	0	0	0	0.781044	1	0.003415	0.0225744	FALSE	FALSE	FALSE
INTS12	0.000329435	0.00135854	-32.7868	-45.3288	13	7	4.85428	0	0	0	0	0.786613	1	0.0329117	0.129044	FALSE	FALSE	FALSE
INTS2	1.35925e-10	1.39105e-09	-30.7751	-59.5922	13	7	12.0829	0	0	0	0	0.8767	1	0.0383853	0.144842	FALSE	FALSE	FALSE
IPO4	0.00235733	0.00790634	-30.2228	-40.4189	13	7	4.97042	0	0	0	0	0.123833	1	0.382334	0.680961	FALSE	FALSE	FALSE
IPO5	2.46251e-06	1.4412e-05	-47.8194	-65.9455	13	7	20.2618	0	0	0	0	0.329078	1	0.296195	0.583241	FALSE	FALSE	FALSE
IRF1	7.24126e-11	7.65652e-10	-39.2667	-68.7581	13	7	28.4184	0	0	0	0	0.17862	1	7.23659e-50	1.46771e-47	FALSE	TRUE	FALSE
IRF7	2.22271e-10	2.22371e-09	-20.5012	-48.7908	13	7	2.7997	0	0	0	0	0.780427	1	0.0151802	0.073704	FALSE	FALSE	FALSE
ISCA1	4.21749e-11	4.55652e-10	-40.2923	-70.3618	13	7	11.3955	0	0	0	0	0.971871	1	0.726384	0.952711	FALSE	FALSE	FALSE
ISCU	2.87187e-08	2.24812e-07	-41.2467	-64.2798	13	7	14.1426	0	0	0	0	0.893696	1	0.0294422	0.119104	FALSE	FALSE	FALSE
ISG15	1.38142e-07	9.52686e-07	-52.3301	-73.6444	13	7	41.5116	0	0	0	0	0.999988	1	2.04397e-08	4.38471e-07	FALSE	TRUE	FALSE
ISOC2	0.00208415	0.00707184	-26.8457	-37.1914	13	7	3.83656	0	0	0	0	0.344221	1	0.0870899	0.257346	FALSE	FALSE	FALSE
ITGA1	4.95959e-12	5.76294e-11	-43.645	-75.9966	13	7	17.8143	0	0	0	0	0.168765	1	7.75808e-15	3.23519e-13	FALSE	TRUE	FALSE
ITGA6	3.39678e-05	0.000166189	-30.1067	-45.2734	13	7	6.49035	0	0	0	0	1	1	3.75652e-05	0.000456719	FALSE	TRUE	FALSE
ITGB1	1.53675e-05	7.9825e-05	-44.2832	-60.3512	13	7	17.816	0	0	0	0	0.530592	1	0.0248507	0.105316	FALSE	FALSE	FALSE
ITGB2	1.13545e-08	9.38216e-08	-20.8025	-44.8458	13	7	3.77354	0	0	0	0	1	1	1	1	FALSE	FALSE	FALSE
ITGBL1	0.000696912	0.002651	-19.0656	-30.7242	13	7	1.52079	0	0	0	0	0.295311	1	0.700353	0.937363	FALSE	FALSE	FALSE
ITM2B	2.82194e-06	1.63526e-05	-50.3282	-68.302	13	7	25.9454	0	0	0	0	0.936496	1	0.22065	0.479796	FALSE	FALSE	FALSE
ITPRID2	0.00035131	0.00143812	-40.6622	-53.1288	13	7	10.988	0	0	0	0	0.684318	1	0.0356673	0.137433	FALSE	FALSE	FALSE
ITSN2	0.000165654	0.000729663	-30.0117	-43.3557	13	7	5.51919	0	0	0	0	0.762468	1	0.321503	0.611046	FALSE	FALSE	FALSE
IWS1	7.72054e-11	8.12087e-10	-94.6262	-124.049	13	7	472.246	0	0	0	0	0.435503	1	0.939133	1	FALSE	FALSE	FALSE
JAK1	5.54296e-06	3.08004e-05	-42.0664	-59.284	13	7	14.2934	0	0	0	0	1	1	0.162583	0.390655	FALSE	FALSE	FALSE
JAM3	2.46121e-08	1.9437e-07	-23.4535	-46.6549	13	7	4.01643	0	0	0	0	1	1	0.903077	1	FALSE	FALSE	FALSE
JAZF1	1.54659e-23	4.13227e-22	-25.8186	-85.8726	13	7	10.0363	0	0	0	0	0.892573	1	8.59455e-31	9.35338e-29	FALSE	TRUE	FALSE
JMJD1C	2.1186e-05	0.00010779	-40.1341	-55.838	13	7	13.8907	0	0	0	0	0.511199	1	0.096046	0.27609	FALSE	FALSE	FALSE
JUN	1.52913e-14	2.25181e-13	-51.451	-89.9211	13	7	64.0314	0	0	0	0	0.622457	1	2.36041e-74	8.77678e-72	FALSE	TRUE	FALSE
KATNBL1	2.28574e-05	0.000115504	-22.7707	-38.3883	13	7	2.58499	0	0	0	0	0.991357	1	0.941929	1	FALSE	FALSE	FALSE
KDELR1	0.00106771	0.00387959	-43.5845	-54.7351	13	7	17.1055	0	0	0	0	0.570741	1	1.9826e-05	0.000259424	FALSE	TRUE	FALSE
KDELR2	0.000346794	0.00142224	-42.252	-54.7338	13	7	19.7395	0	0	0	0	0.455294	1	3.26937e-08	6.9137e-07	FALSE	TRUE	FALSE
KDM5B	7.47614e-14	1.03598e-12	-48.1422	-84.9386	13	7	18.3888	0	0	0	0	0.701105	1	0.720066	0.947814	FALSE	FALSE	FALSE
KDM6A	0.000672175	0.00257005	-34.2938	-45.9952	13	7	11.2614	0	0	0	0	0.474369	1	6.95678e-14	2.6085e-12	FALSE	TRUE	FALSE
KIAA0586	1.18834e-05	6.33496e-05	-29.6998	-46.0585	13	7	4.99123	0	0	0	0	0.641143	1	0.967542	1	FALSE	FALSE	FALSE
KIAA1586	6.03553e-13	7.73866e-12	-50.8006	-85.3882	13	7	22.2981	0	0	0	0	1	1	2.32908e-05	0.000298631	FALSE	TRUE	FALSE
KIF20B	5.59375e-10	5.32181e-09	-65.8673	-93.1652	13	7	69.5535	0	0	0	0	0.856553	1	0.0163212	0.0777218	FALSE	FALSE	FALSE
KIF21A	2.46444e-06	1.4412e-05	-39.5783	-57.7034	13	7	16.2238	0	0	0	0	0.618553	1	0.987767	1	FALSE	FALSE	FALSE
KIF27	6.27467e-10	5.93169e-09	-44.0093	-71.1836	13	7	16.1552	0	0	0	0	0.646027	1	0.685444	0.928573	FALSE	FALSE	FALSE
KIF4B	2.59028e-06	1.50885e-05	-22.2603	-40.3298	13	7	3.02785	0	0	0	0	0.999677	1	0.90101	1	FALSE	FALSE	FALSE
KIF5B	7.53305e-08	5.41264e-07	-56.2443	-78.2236	13	7	43.7014	0	0	0	0	0.538309	1	0.974718	1	FALSE	FALSE	FALSE
KLC1	8.1575e-08	5.8145e-07	-27.3794	-49.2715	13	7	5.84195	0	0	0	0	0.999894	1	0.663675	0.915966	FALSE	FALSE	FALSE
KLF4	2.7111e-48	2.12227e-46	-26.8848	-145.283	13	7	24.4387	0	0	0	0	0.999992	1	2.47621e-72	8.49911e-70	FALSE	TRUE	FALSE
KMT2C	7.84077e-07	4.87264e-06	-35.2255	-54.6245	13	7	6.30183	0	0	0	0	0.980834	1	6.14688e-13	2.05381e-11	FALSE	TRUE	FALSE
KMT2E	0.000549513	0.00214705	-43.4287	-55.3686	13	7	17.7178	0	0	0	0	0.993527	1	3.47698e-21	2.18511e-19	FALSE	TRUE	FALSE
KRR1	3.19317e-10	3.10412e-09	-40.2568	-68.1574	13	7	12.4489	0	0	0	0	0.240795	1	0.0594207	0.197714	FALSE	FALSE	FALSE
KRT7	7.00001e-11	7.41902e-10	-45.2461	-74.7738	13	7	18.3798	0	0	0	0	0.971416	1	0.991959	1	FALSE	FALSE	FALSE
KRT80	0.00102108	0.00372838	-20.2156	-31.4196	13	7	1.96506	0	0	0	0	0.99991	1	0.657095	0.910373	FALSE	FALSE	FALSE
KYNU	3.33371e-22	8.12842e-21	-62.707	-119.584	13	7	82.8857	0	0	0	0	0.9566	1	3.15588e-05	0.000391153	FALSE	TRUE	FALSE
L3MBTL4	1.77847e-47	1.30091e-45	-37.5741	-154.059	13	7	20.2388	0	0	0	0	1	1	1.14614e-09	2.87308e-08	FALSE	TRUE	FALSE
LACTB2	2.4614e-09	2.17912e-08	-35.6896	-61.3897	13	7	10.7496	0	0	0	0	0.45438	1	0.414648	0.714363	FALSE	FALSE	FALSE
LAMB2	0.000966718	0.00354728	-23.0285	-34.2978	13	7	2.65152	0	0	0	0	0.999982	1	0.0129222	0.0655215	FALSE	FALSE	FALSE
LAMB4	2.14831e-74	3.30543e-72	-33.3899	-212.713	13	7	38.6743	0	0	0	0	0.606915	1	0.926996	1	FALSE	FALSE	FALSE
LAMP1	1.00708e-08	8.38359e-08	-33.4636	-57.6373	13	7	9.23519	0	0	0	0	0.506968	1	0.918436	1	FALSE	FALSE	FALSE
LAMTOR2	1.07016e-12	1.33382e-11	-46.3646	-80.3451	13	7	35.3176	0	0	0	0	0.752028	1	2.57291e-07	4.62916e-06	FALSE	TRUE	FALSE
LAPTM4A	1.22623e-06	7.43931e-06	-59.2361	-78.1388	13	7	41.4943	0	0	0	0	0.992206	1	0.00190402	0.0139047	FALSE	FALSE	FALSE
LAPTM4B	0.000271854	0.00113769	-30.3016	-43.0685	13	7	5.29049	0	0	0	0	0.99343	1	0.548959	0.830255	FALSE	FALSE	FALSE
LARP7	0.000123138	0.000556116	-72.8052	-86.4929	13	7	114.636	0	0	0	0	0.698287	1	0.0759508	0.23444	FALSE	FALSE	FALSE
LARS1	0.000979837	0.00359247	-44.4633	-55.7165	13	7	17.4383	0	0	0	0	0.563024	1	0.403252	0.703405	FALSE	FALSE	FALSE
LAT	3.66767e-07	2.36833e-06	-21.2075	-41.4468	13	7	3.1463	0	0	0	0	0.33823	1	0.0517153	0.178464	FALSE	FALSE	FALSE
LAYN	4.40011e-06	2.48838e-05	-44.0777	-61.5544	13	7	25.2847	0	0	0	0	0.720159	1	0.0408899	0.151411	FALSE	FALSE	FALSE
LDLRAD3	1.89657e-35	9.40279e-34	-27.842	-116.082	13	7	10.8188	0	0	0	0	0.903915	1	0.00024464	0.00238859	FALSE	FALSE	FALSE
LEPR	3.36615e-20	6.8898e-19	-33.7703	-85.8594	13	7	8.45399	0	0	0	0	0.533333	1	0.00889103	0.0488569	FALSE	FALSE	FALSE
LEPROTL1	1.3232e-18	2.53395e-17	-39.3171	-87.5854	13	7	12.4034	0	0	0	0	0.595612	1	0.422622	0.720066	FALSE	FALSE	FALSE
LGALS1	1.90941e-105	7.74525e-103	-67.3168	-318.811	13	7	249.928	0	0	0	0	0.817768	1	7.23848e-10	1.8778e-08	FALSE	TRUE	FALSE
LGALS3BP	5.70799e-13	7.33979e-12	-34.0483	-68.695	13	7	10.6819	0	0	0	0	0.766939	1	0.000149289	0.00154196	FALSE	FALSE	FALSE
LHX1	3.15254e-27	1.02676e-25	-30.8702	-99.6907	13	7	13.1025	0	0	0	0	0.999824	1	0.900805	1	FALSE	FALSE	FALSE
LIG4	0.00146695	0.00518251	-43.9075	-54.6772	13	7	15.1519	0	0	0	0	1	1	1.98928e-14	7.85501e-13	FALSE	TRUE	FALSE
LIMA1	9.04574e-15	1.3454e-13	-31.9677	-70.9905	13	7	10.9173	0	0	0	0	0.17027	1	1.80132e-05	0.000239212	FALSE	TRUE	FALSE
LIMD2	0.000142442	0.000634308	-27.2875	-40.8066	13	7	6.10528	0	0	0	0	1	1	0.144361	0.363098	FALSE	FALSE	FALSE
LIPT1	1.30663e-05	6.87523e-05	-19.0514	-35.3028	13	7	2.55654	0	0	0	0	0.212507	1	0.541626	0.825897	FALSE	FALSE	FALSE
LLPH	2.41561e-12	2.90524e-11	-67.3652	-100.482	13	7	97.4316	0	0	0	0	0.0354676	1	0.543938	0.827498	FALSE	FALSE	FALSE
LMAN2	6.5356e-05	0.000307699	-51.7833	-66.2011	13	7	33.3541	0	0	0	0	0.994367	1	0.00114387	0.0091142	FALSE	FALSE	FALSE
LONP1	7.97648e-18	1.45865e-16	-37.5708	-83.9652	13	7	16.2436	0	0	0	0	0.983341	1	0.1912	0.437056	FALSE	FALSE	FALSE
LOX	7.47703e-07	4.66609e-06	-37.723	-57.1747	13	7	8.77783	0	0	0	0	0.343294	1	0.97653	1	FALSE	FALSE	FALSE
LOXL1	5.43055e-07	3.44682e-06	-35.3748	-55.1804	13	7	8.73488	0	0	0	0	0.931741	1	0.316356	0.606348	FALSE	FALSE	FALSE
LOXL2	6.99441e-07	4.37102e-06	-28.2318	-47.7574	13	7	4.77956	0	0	0	0	0.559585	1	0.0232518	0.100543	FALSE	FALSE	FALSE
LPCAT3	0.000100263	0.000463599	-39.68	-53.6051	13	7	16.6746	0	0	0	0	0.797327	1	0.000645223	0.00556863	FALSE	FALSE	FALSE
LRRIQ1	0.000215409	0.000919765	-22.8666	-35.9051	13	7	3.04401	0	0	0	0	0.757263	1	0.777221	0.98001	FALSE	FALSE	FALSE
LRRK2	5.36871e-18	9.93991e-17	-24.6398	-71.4474	13	7	7.71839	0	0	0	0	1	1	1	1	FALSE	FALSE	FALSE
LRRN3	1.42944e-31	5.79834e-30	-30.4229	-109.519	13	7	8.67887	0	0	0	0	0.40987	1	2.85362e-39	4.10737e-37	FALSE	TRUE	FALSE
LSM12	1.27123e-33	5.507e-32	-43.2777	-127.214	13	7	21.1947	0	0	0	0	0.90203	1	0.635425	0.895818	FALSE	FALSE	FALSE
LSM7	1.13206e-06	6.91952e-06	-44.3917	-63.3831	13	7	17.4152	0	0	0	0	0.252865	1	0.000493433	0.00441222	FALSE	FALSE	FALSE
LSM8	0.00102589	0.00374288	-24.4665	-35.6649	13	7	3.7803	0	0	0	0	0.9993	1	0.00146975	0.0113069	FALSE	FALSE	FALSE
LTBR	2.15227e-07	1.4463e-06	-31.3443	-52.1711	13	7	6.75148	0	0	0	0	0.753714	1	0.168671	0.400538	FALSE	FALSE	FALSE
LTN1	6.18949e-12	7.1363e-11	-43.3214	-75.4373	13	7	16.6791	0	0	0	0	0.589654	1	0.0854815	0.254789	FALSE	FALSE	FALSE
LTO1	3.9063e-17	6.8893e-16	-27.0001	-71.7345	13	7	6.95806	0	0	0	0	0.411973	1	0.000260467	0.00252439	FALSE	FALSE	FALSE
LUC7L2	1.19452e-05	6.35274e-05	-34.8334	-51.1862	13	7	10.065	0	0	0	0	1.5352e-06	0.00228336	1.64357e-07	3.08135e-06	FALSE	TRUE	FALSE
LUC7L3	1.15476e-05	6.17069e-05	-43.0206	-59.4117	13	7	16.8992	0	0	0	0	0.0149127	1	0.0512171	0.177156	FALSE	FALSE	FALSE
LY6E	2.63023e-16	4.39554e-15	-47.6775	-90.4156	13	7	26.8053	0	0	0	0	0.22986	1	0.268938	0.548446	FALSE	FALSE	FALSE
M6PR	2.84501e-05	0.000141837	-37.8706	-53.2392	13	7	10.5137	0	0	0	0	0.331326	1	0.431756	0.730291	FALSE	FALSE	FALSE
MACF1	4.42371e-12	5.19437e-11	-39.4241	-71.8974	13	7	11.4159	0	0	0	0	0.0517714	1	0.06637	0.213359	FALSE	FALSE	FALSE
MAFF	4.3117e-09	3.69977e-08	-20.9281	-46.0217	13	7	2.30085	0	0	0	0	0.000470469	0.318698	0.0107496	0.0562566	FALSE	FALSE	FALSE
MAGED2	3.03576e-16	5.03553e-15	-51.2097	-93.7976	13	7	33.0866	0	0	0	0	0.596205	1	0.886133	1	FALSE	FALSE	FALSE
MALSU1	0.000802726	0.00302004	-42.4741	-53.9648	13	7	13.6071	0	0	0	0	0.995256	1	0.000727749	0.00618631	FALSE	FALSE	FALSE
MANF	1.20695e-12	1.4918e-11	-27.1931	-61.046	13	7	6.70803	0	0	0	0	0.999879	1	0.202619	0.454767	FALSE	FALSE	FALSE
MAP2K5	0.000107524	0.000493087	-25.2591	-39.1036	13	7	3.41217	0	0	0	0	0.999964	1	0.659991	0.912575	FALSE	FALSE	FALSE
MAP4K4	2.29458e-13	3.03811e-12	-72.074	-107.685	13	7	156.517	0	0	0	0	0.74357	1	9.4379e-17	4.29713e-15	FALSE	TRUE	FALSE
MAPRE3	2.35118e-14	3.41725e-13	-30.59	-68.6068	13	7	8.09303	0	0	0	0	0.998523	1	0.763123	0.971171	FALSE	FALSE	FALSE
MARCHF5	1.63761e-13	2.20756e-12	-48.4075	-84.3755	13	7	27.3262	0	0	0	0	0.995709	1	2.133e-31	2.57228e-29	FALSE	TRUE	FALSE
MAT2A	3.75328e-09	3.25187e-08	-38.4278	-63.6716	13	7	10.1079	0	0	0	0	0.985909	1	0.0651695	0.210741	FALSE	FALSE	FALSE
MAT2B	0.00085023	0.00317467	-24.0286	-35.4509	13	7	3.53594	0	0	0	0	0.995702	1	0.0051809	0.0319298	FALSE	FALSE	FALSE
MAZ	5.5168e-05	0.000263618	-24.842	-39.4542	13	7	3.65986	0	0	0	0	0.57411	1	0.023063	0.10019	FALSE	FALSE	FALSE
MBNL1	1.08768e-06	6.68489e-06	-34.1575	-53.1934	13	7	7.49821	0	0	0	0	0.374898	1	0.0959418	0.27609	FALSE	FALSE	FALSE
MCL1	9.78751e-17	1.69271e-15	-17.0414	-60.8148	13	7	2.9034	0	0	0	0	0.878179	1	6.39061e-12	1.91375e-10	FALSE	TRUE	FALSE
MCM7	0.000766478	0.00289098	-41.6338	-53.1795	13	7	16.2	0	0	0	0	0.534592	1	0.199444	0.449227	FALSE	FALSE	FALSE
MCUB	0.00299707	0.00978268	-32.2583	-42.1618	13	7	4.8472	0	0	0	0	0.574038	1	0.89856	1	FALSE	FALSE	FALSE
MCUR1	2.28681e-26	6.98886e-25	-81.392	-148.172	13	7	287.565	0	0	0	0	0.866334	1	0.94596	1	FALSE	FALSE	FALSE
MDGA1	1.21256e-10	1.24952e-09	-28.9813	-57.9207	13	7	6.28489	0	0	0	0	0.330775	1	0.686932	0.928972	FALSE	FALSE	FALSE
MDH1	2.07456e-08	1.66307e-07	-44.9634	-68.351	13	7	27.1039	0	0	0	0	0.702623	1	0.000232741	0.00230264	FALSE	FALSE	FALSE
MDM2	1.15819e-11	1.29196e-10	-29.4202	-60.8689	13	7	12.2576	0	0	0	0	0.444126	1	0.417541	0.716367	FALSE	FALSE	FALSE
MDM4	0.00177232	0.00613506	-37.3777	-47.9194	13	7	7.91193	0	0	0	0	0.999974	1	0.0505277	0.175451	FALSE	FALSE	FALSE
MED13L	0.000175754	0.00076582	-32.0028	-45.2781	13	7	5.28907	0	0	0	0	0.279939	1	2.50248e-13	8.72347e-12	FALSE	TRUE	FALSE
MED4	2.10355e-23	5.58694e-22	-33.5853	-93.3213	13	7	9.49783	0	0	0	0	0.454476	1	0.978612	1	FALSE	FALSE	FALSE
MEST	2.65123e-10	2.61143e-09	-16.9857	-45.0861	13	7	2.49547	0	0	0	0	0.737226	1	0.00356559	0.0232258	FALSE	FALSE	FALSE
METTL14	1.1632e-07	8.09705e-07	-25.251	-46.754	13	7	5.4261	0	0	0	0	0.582839	1	0.989902	1	FALSE	FALSE	FALSE
METTL23	1.63326e-06	9.72978e-06	-37.7426	-56.3264	13	7	10.4189	0	0	0	0	0.0622285	1	0.731975	0.955551	FALSE	FALSE	FALSE
METTL9	4.96189e-08	3.70853e-07	-38.6449	-61.081	13	7	11.1112	0	0	0	0	0.443087	1	0.544469	0.828024	FALSE	FALSE	FALSE
MFGE8	6.99049e-07	4.37102e-06	-21.998	-41.5241	13	7	2.6078	0	0	0	0	0.771656	1	0.928625	1	FALSE	FALSE	FALSE
MGAT1	2.09511e-06	1.23984e-05	-25.8673	-44.1736	13	7	4.2466	0	0	0	0	0.584303	1	0.00741434	0.0422688	FALSE	FALSE	FALSE
MGP	8.02757e-30	2.86552e-28	-39.0785	-114.041	13	7	20.4755	0	0	0	0	0.917995	1	0.000208349	0.00208442	FALSE	FALSE	FALSE
MGST1	1.45548e-21	3.26349e-20	-62.5426	-117.892	13	7	111.235	0	0	0	0	0.00715682	1	9.14128e-17	4.20499e-15	FALSE	TRUE	FALSE
MGST3	2.35068e-09	2.08524e-08	-35.4094	-61.1592	13	7	12.8549	0	0	0	0	0.9831	1	0.00847962	0.047262	FALSE	FALSE	FALSE
MIA3	0.00252448	0.0083906	-36.7979	-46.9108	13	7	6.85024	0	0	0	0	0.534147	1	0.97637	1	FALSE	FALSE	FALSE
MICU1	4.86246e-07	3.1039e-06	-40.4095	-60.3373	13	7	9.05255	0	0	0	0	0.391813	1	0.7419	0.960909	FALSE	FALSE	FALSE
MICU2	1.99494e-07	1.3487e-06	-52.4831	-73.3934	13	7	24.3472	0	0	0	0	0.742362	1	0.996802	1	FALSE	FALSE	FALSE
MIF	1.27393e-10	1.30673e-09	-60.5687	-89.4552	13	7	80.3083	0	0	0	0	0.0449394	1	3.42127e-11	9.84886e-10	FALSE	TRUE	FALSE
MIF4GD	0.00186296	0.00641398	-30.2978	-40.7792	13	7	6.87833	0	0	0	0	1	1	0.0180711	0.083299	FALSE	FALSE	FALSE
MINDY3	0.00260025	0.00862626	-29.5896	-39.6665	13	7	4.55038	0	0	0	0	0.983426	1	0.446844	0.744596	FALSE	FALSE	FALSE
MKI67	7.06061e-27	2.25032e-25	-34.8634	-102.854	13	7	15.2263	0	0	0	0	0.916295	1	0.696002	0.934358	FALSE	FALSE	FALSE
MLLT10	0.000504885	0.00199186	-27.1531	-39.193	13	7	4.06007	0	0	0	0	0.999996	1	0.0721864	0.225773	FALSE	FALSE	FALSE
MMD	0.00141049	0.00499888	-21.3071	-32.1239	13	7	2.61765	0	0	0	0	0.999841	1	0.153254	0.375311	FALSE	FALSE	FALSE
MMP1	1.12045e-06	6.8674e-06	-32.8358	-51.8387	13	7	7.03161	0	0	0	0	0.019365	1	0.0030934	0.020756	FALSE	FALSE	FALSE
MMP13	2.97971e-08	2.32086e-07	-20.9083	-43.9013	13	7	2.94298	0	0	0	0	0.481854	1	0.242379	0.509898	FALSE	FALSE	FALSE
MMP2	2.36416e-22	5.89323e-21	-20.9935	-78.226	13	7	6.6647	0	0	0	0	0.968593	1	0.00335086	0.0222163	FALSE	FALSE	FALSE
MOSPD1	1.72909e-12	2.10798e-11	-47.7136	-81.185	13	7	22.0582	0	0	0	0	0.198317	1	1.44948e-23	1.07793e-21	FALSE	TRUE	FALSE
MPHOSPH10	5.72097e-08	4.23333e-07	-79.4225	-101.703	13	7	143.554	0	0	0	0	0.13757	1	0.322334	0.611697	FALSE	FALSE	FALSE
MPP5	5.35368e-06	2.98601e-05	-33.2097	-50.4663	13	7	6.64429	0	0	0	0	0.242906	1	0.808847	0.991776	FALSE	FALSE	FALSE
MPP6	0.00180082	0.00622889	-33.5165	-44.039	13	7	4.5909	0	0	0	0	0.398753	1	0.733444	0.956372	FALSE	FALSE	FALSE
MRC2	0.000284456	0.00118399	-17.0537	-29.7676	13	7	1.92876	0	0	0	0	1	1	0.0351185	0.135905	FALSE	FALSE	FALSE
MRFAP1L1	0.00252545	0.0083906	-23.5532	-33.6655	13	7	2.09636	0	0	0	0	0.664846	1	0.493792	0.78605	FALSE	FALSE	FALSE
MRM2	5.07033e-05	0.000243791	-23.1596	-37.8685	13	7	2.71247	0	0	0	0	0.220167	1	0.313204	0.602119	FALSE	FALSE	FALSE
MRNIP	4.48178e-09	3.83833e-08	-33.0647	-58.1165	13	7	7.7879	0	0	0	0	0.205895	1	0.000526872	0.00469242	FALSE	FALSE	FALSE
MRPL10	5.67194e-06	3.14388e-05	-30.8942	-48.086	13	7	7.3768	0	0	0	0	1	1	0.0558201	0.188403	FALSE	FALSE	FALSE
MRPL15	4.42826e-10	4.25839e-09	-57.2214	-84.7706	13	7	62.6993	0	0	0	0	0.129565	1	1.03664e-08	2.33611e-07	FALSE	TRUE	FALSE
MRPL2	2.13873e-16	3.60114e-15	-64.6307	-107.586	13	7	75.4904	0	0	0	0	0.450839	1	0.0230942	0.10019	FALSE	FALSE	FALSE
MRPL21	2.58409e-07	1.70566e-06	-47.0454	-67.6709	13	7	19.5406	0	0	0	0	0.237767	1	0.523408	0.81091	FALSE	FALSE	FALSE
MRPL22	0.000734049	0.00278041	-45.4401	-57.0371	13	7	15.353	0	0	0	0	0.124982	1	0.146449	0.366038	FALSE	FALSE	FALSE
MRPL48	0.000222578	0.000947655	-30.793	-43.7934	13	7	6.52486	0	0	0	0	0.999949	1	0.0615419	0.20206	FALSE	FALSE	FALSE
MRPS15	1.69072e-09	1.53645e-08	-47.5819	-73.6877	13	7	21.2895	0	0	0	0	0.746842	1	0.369238	0.66729	FALSE	FALSE	FALSE
MRPS2	0.00232184	0.00780124	-36.4031	-46.6177	13	7	8.01591	0	0	0	0	0.719498	1	0.0384017	0.144842	FALSE	FALSE	FALSE
MRPS34	0.000200047	0.00086076	-38.8159	-51.9406	13	7	16.5359	0	0	0	0	0.568983	1	2.87304e-08	6.13374e-07	FALSE	TRUE	FALSE
MRPS6	1.80726e-21	3.97241e-20	-41.7861	-96.9109	13	7	23.3036	0	0	0	0	1	1	1.09406e-09	2.75802e-08	FALSE	TRUE	FALSE
MRPS9	0.00293461	0.00961396	-32.0069	-41.9362	13	7	5.22384	0	0	0	0	0.572875	1	0.837518	1	FALSE	FALSE	FALSE
MRRF	2.9074e-05	0.000144463	-31.5713	-46.9153	13	7	4.80111	0	0	0	0	0.771243	1	1.07132e-05	0.000147994	FALSE	TRUE	FALSE
MSC	8.66991e-09	7.29908e-08	-16.65	-40.9863	13	7	3.7731	0	0	0	0	0.999858	1	0.000118926	0.00126646	FALSE	FALSE	FALSE
MT-ND2	1.85913e-16	3.15415e-15	-98.7238	-141.825	13	7	803.075	0	0	0	0	0.0839588	1	0.161223	0.388433	FALSE	FALSE	FALSE
MT-ND4	5.76458e-29	1.93395e-27	-92.0284	-164.965	13	7	582.929	0	0	0	0	0.502247	1	3.85749e-08	8.00563e-07	FALSE	TRUE	FALSE
MTDH	2.2583e-07	1.50396e-06	-50.5483	-71.3221	13	7	30.6045	0	0	0	0	0.686703	1	0.00576085	0.0349727	FALSE	FALSE	FALSE
MTFP1	0.000191197	0.000827469	-19.4174	-32.5947	13	7	2.26256	0	0	0	0	0.999899	1	0.656642	0.910201	FALSE	FALSE	FALSE
MTPN	1.6654e-07	1.13798e-06	-38.2552	-59.3641	13	7	13.7036	0	0	0	0	0.325939	1	0.126889	0.334029	FALSE	FALSE	FALSE
MTRES1	3.44243e-07	2.23258e-06	-53.5051	-73.8143	13	7	28.9167	0	0	0	0	0.808692	1	0.000986283	0.00801602	FALSE	FALSE	FALSE
MUC12	7.54168e-05	0.000353106	-22.6009	-36.8541	13	7	2.9859	0	0	0	0	0.653267	1	0.418827	0.716367	FALSE	FALSE	FALSE
MX1	3.73057e-12	4.41533e-11	-20.0427	-52.6972	13	7	3.64436	0	0	0	0	0.751173	1	4.53315e-08	9.27841e-07	FALSE	TRUE	FALSE
MX2	2.22522e-07	1.48637e-06	-15.2606	-36.0507	13	7	1.9075	0	0	0	0	0.792594	1	0.0877586	0.258981	FALSE	FALSE	FALSE
MXD1	0.00225407	0.00760793	-22.9909	-33.2414	13	7	4.10702	0	0	0	0	0.507803	1	4.00363e-19	2.23302e-17	FALSE	TRUE	FALSE
MYB	3.63406e-143	5.40506e-140	-38.9325	-377.876	13	7	105.869	0	0	0	0	0.70885	1	0.457924	0.755512	FALSE	FALSE	FALSE
MYH3	2.98039e-08	2.32086e-07	-31.9331	-54.9258	13	7	12.0695	0	0	0	0	0.735361	1	2.64309e-13	9.14223e-12	FALSE	TRUE	FALSE
MYO1B	5.92691e-05	0.000281939	-18.4291	-32.9591	13	7	2.16584	0	0	0	0	1	1	1	1	FALSE	FALSE	FALSE
MYO6	0.00196896	0.00672187	-36.567	-46.9816	13	7	7.06674	0	0	0	0	0.999474	1	0.153565	0.375662	FALSE	FALSE	FALSE
N4BP2L2	4.94409e-08	3.70143e-07	-37.6865	-60.1265	13	7	7.04797	0	0	0	0	0.0186508	1	0.00166688	0.0125423	FALSE	FALSE	FALSE
NAA10	0.00011969	0.000541639	-44.3246	-58.0452	13	7	16.0412	0	0	0	0	0.269144	1	0.00382158	0.0247129	FALSE	FALSE	FALSE
NAA20	0.00125821	0.00452387	-36.5642	-47.5183	13	7	8.2853	0	0	0	0	1	1	0.00283914	0.0192819	FALSE	FALSE	FALSE
NAA25	5.9718e-05	0.000283168	-31.999	-46.5203	13	7	6.5512	0	0	0	0	0.763852	1	0.762006	0.97034	FALSE	FALSE	FALSE
NAA35	0.00185863	0.00640402	-37.533	-48.0173	13	7	7.14056	0	0	0	0	0.766331	1	0.960931	1	FALSE	FALSE	FALSE
NAA60	1.68064e-05	8.69954e-05	-32.9098	-48.8764	13	7	4.6835	0	0	0	0	0.0375756	1	5.34699e-08	1.06422e-06	FALSE	TRUE	FALSE
NABP1	9.05534e-22	2.07205e-20	-31.9739	-87.8151	13	7	9.68992	0	0	0	0	0.998803	1	0.463099	0.758353	FALSE	FALSE	FALSE
NAIP	4.52294e-33	1.88611e-31	-28.8499	-111.486	13	7	8.49692	0	0	0	0	0.902851	1	1.94787e-05	0.00025563	FALSE	TRUE	FALSE
NAMPT	3.73002e-18	6.993e-17	-40.5917	-87.7793	13	7	14.2476	0	0	0	0	0.995859	1	0.22803	0.491056	FALSE	FALSE	FALSE
NAP1L1	1.65803e-78	2.84543e-76	-63.8694	-252.765	13	7	160.946	0	0	0	0	1	1	1.33612e-06	2.22455e-05	FALSE	TRUE	FALSE
NAPRT	0.000305611	0.00126614	-17.5843	-30.2142	13	7	2.14049	0	0	0	0	1	1	1	1	FALSE	FALSE	FALSE
NAPSA	7.95642e-16	1.27703e-14	-24.0019	-65.5793	13	7	7.31097	0	0	0	0	1	1	1	1	FALSE	FALSE	FALSE
NARS1	2.04443e-34	9.21439e-33	-49.1236	-134.931	13	7	45.0046	0	0	0	0	0.63555	1	0.0278851	0.114782	FALSE	FALSE	FALSE
NASP	0.000440795	0.00176555	-46.0325	-58.2325	13	7	16.0601	0	0	0	0	0.281947	1	0.541775	0.825897	FALSE	FALSE	FALSE
NAV2	2.56492e-06	1.49603e-05	-26.8874	-44.9679	13	7	5.19777	0	0	0	0	0.997981	1	1.04675e-20	6.48695e-19	FALSE	TRUE	FALSE
NCKAP1	1.36413e-05	7.14408e-05	-30.8515	-47.0542	13	7	5.97205	0	0	0	0	0.959383	1	0.302825	0.591217	FALSE	FALSE	FALSE
NCL	2.49891e-07	1.65432e-06	-91.2178	-111.88	13	7	395.628	0	0	0	0	0.247764	1	4.85644e-06	7.15163e-05	FALSE	TRUE	FALSE
NCOA7	3.72693e-34	1.64649e-32	-32.5227	-117.715	13	7	11.1568	0	0	0	0	0.8669	1	9.34706e-42	1.48952e-39	FALSE	TRUE	FALSE
NDC80	2.73758e-07	1.79898e-06	-39.3829	-59.9448	13	7	8.09018	0	0	0	0	0.994357	1	0.999826	1	FALSE	FALSE	FALSE
NDFIP2	1.50324e-06	9.02751e-06	-35.9884	-54.6645	13	7	9.28936	0	0	0	0	0.069546	1	0.918348	1	FALSE	FALSE	FALSE
NDUFA10	0.00259686	0.00862143	-34.7862	-44.8646	13	7	10.9194	0	0	0	0	1	1	0.000292166	0.00276782	FALSE	FALSE	FALSE
NDUFA13	1.29073e-06	7.79328e-06	-58.5059	-77.3515	13	7	49.0119	0	0	0	0	1	1	0.00200784	0.0145184	FALSE	FALSE	FALSE
NDUFA8	6.12575e-10	5.80321e-09	-60.0699	-87.27	13	7	74.8772	0	0	0	0	0.977276	1	2.12064e-13	7.50975e-12	FALSE	TRUE	FALSE
NDUFA9	2.02337e-09	1.8129e-08	-37.1409	-63.0527	13	7	11.2776	0	0	0	0	0.331231	1	0.893479	1	FALSE	FALSE	FALSE
NDUFAF3	0.00053875	0.00211054	-40.0733	-52.0365	13	7	15.2399	0	0	0	0	0.979915	1	0.00401939	0.0258795	FALSE	FALSE	FALSE
NDUFB2	8.90323e-12	1.00573e-10	-49.0281	-80.757	13	7	34.7631	0	0	0	0	0.906103	1	4.76843e-06	7.04528e-05	FALSE	TRUE	FALSE
NDUFB5	1.47203e-10	1.49618e-09	-33.5106	-62.2422	13	7	10.3447	0	0	0	0	0.113651	1	8.42343e-05	0.000937202	FALSE	TRUE	FALSE
NDUFS1	3.18462e-20	6.54829e-19	-55.5963	-107.743	13	7	48.2568	0	0	0	0	0.706475	1	0.51441	0.802746	FALSE	FALSE	FALSE
NDUFS2	0.000605139	0.00233575	-44.9894	-56.8153	13	7	10.7412	0	0	0	0	0.974516	1	0.907643	1	FALSE	FALSE	FALSE
NDUFS4	2.16338e-05	0.000109943	-45.598	-61.2782	13	7	21.2365	0	0	0	0	1	1	4.48475e-05	0.000536487	FALSE	TRUE	FALSE
NDUFS8	0.000292915	0.00121693	-43.2835	-55.9631	13	7	22.5537	0	0	0	0	0.45956	1	6.27635e-07	1.07712e-05	FALSE	TRUE	FALSE
NDUFV2	0.00169242	0.00588588	-44.5977	-55.1951	13	7	21.0075	0	0	0	0	0.980276	1	0.0488464	0.171481	FALSE	FALSE	FALSE
NDUFV3	6.31897e-05	0.000298678	-33.3028	-47.7592	13	7	6.30812	0	0	0	0	0.55699	1	0.851793	1	FALSE	FALSE	FALSE
NEK4	3.89891e-06	2.20773e-05	-32.2598	-49.872	13	7	6.13696	0	0	0	0	0.97759	1	0.0850613	0.253875	FALSE	FALSE	FALSE
NEU1	0.00135852	0.00484548	-30.5391	-41.4011	13	7	7.01792	0	0	0	0	0.999915	1	0.00587936	0.0355952	FALSE	FALSE	FALSE
NEURL3	1.97517e-09	1.77686e-08	-22.5346	-48.4725	13	7	9.73118	0	0	0	0	1	1	1	1	FALSE	FALSE	FALSE
NEXN	9.89462e-11	1.03154e-09	-34.2542	-63.4115	13	7	6.14621	0	0	0	0	0.831724	1	0.869095	1	FALSE	FALSE	FALSE
NFE2L2	0.000131738	0.000591365	-46.2122	-59.8218	13	7	18.6156	0	0	0	0	0.99136	1	0.00652497	0.038363	FALSE	FALSE	FALSE
NFKBIA	4.96984e-17	8.73048e-16	-67.3201	-111.803	13	7	186.042	0	0	0	0	1	1	1.16391e-17	5.58428e-16	FALSE	TRUE	FALSE
NFKBIZ	4.21223e-14	6.00479e-13	-53.3521	-90.754	13	7	61.8048	0	0	0	0	0.701814	1	2.93951e-42	5.04465e-40	FALSE	TRUE	FALSE
NFS1	5.62522e-84	1.25499e-81	-41.2647	-242.884	13	7	35.0888	0	0	0	0	0.773958	1	8.9414e-10	2.2929e-08	FALSE	TRUE	FALSE
NMD3	0.000396571	0.00160572	-35.9351	-48.2594	13	7	8.96841	0	0	0	0	0.291086	1	0.265211	0.544079	FALSE	FALSE	FALSE
NME1	8.12325e-07	5.02718e-06	-62.3927	-81.7525	13	7	65.3895	0	0	0	0	0.23707	1	1.58023e-08	3.45637e-07	FALSE	TRUE	FALSE
NME2	0.000266402	0.00111929	-72.2268	-85.0174	13	7	91.5108	0	0	0	0	0.319418	1	7.57783e-05	0.000862558	FALSE	TRUE	FALSE
NME7	2.18926e-06	1.29213e-05	-45.7584	-64.0157	13	7	14.8922	0	0	0	0	0.576148	1	0.108003	0.301005	FALSE	FALSE	FALSE
NNMT	1.8538e-15	2.91255e-14	-24.9756	-65.6651	13	7	12.055	0	0	0	0	0.999958	1	1.82564e-09	4.37958e-08	FALSE	TRUE	FALSE
NOP53	2.62144e-16	4.39554e-15	-37.9039	-80.6455	13	7	17.5116	0	0	0	0	0.568061	1	0.131483	0.341885	FALSE	FALSE	FALSE
NOP56	8.8899e-36	4.50758e-34	-78.9782	-167.993	13	7	503.062	0	0	0	0	0.999996	1	1.78211e-64	4.67751e-62	FALSE	TRUE	FALSE
NOP58	1.63657e-12	2.00065e-11	-59.9147	-93.4445	13	7	62.1761	0	0	0	0	0.439346	1	0.476858	0.77164	FALSE	FALSE	FALSE
NPC2	3.43691e-13	4.53713e-12	-49.5213	-84.7052	13	7	24.6779	0	0	0	0	0.843298	1	0.506847	0.796001	FALSE	FALSE	FALSE
NPM1	0.000474674	0.00188434	-64.1551	-76.2677	13	7	72.9494	0	0	0	0	0.679018	1	4.37739e-07	7.72012e-06	FALSE	TRUE	FALSE
NPM3	0.00012247	0.000553659	-28.122	-41.816	13	7	4.36799	0	0	0	0	0.983539	1	0.485045	0.779356	FALSE	FALSE	FALSE
NPNT	2.5716e-12	3.08308e-11	-27.387	-60.4368	13	7	6.31065	0	0	0	0	0.444422	1	0.33138	0.623364	FALSE	FALSE	FALSE
NQO1	1.17946e-12	1.46188e-11	-62.8466	-96.7239	13	7	97.4426	0	0	0	0	1	1	6.24151e-24	4.97315e-22	FALSE	TRUE	FALSE
NQO2	0.00111029	0.00402446	-70.0612	-81.165	13	7	68.8303	0	0	0	0	1	1	3.28234e-05	0.000405701	FALSE	TRUE	FALSE
NR1D1	1.2271e-06	7.43931e-06	-46.6291	-65.531	13	7	71.8763	0	0	0	0	1	1	7.10371e-72	2.26406e-69	FALSE	TRUE	FALSE
NR2F1	1.53122e-12	1.87701e-11	-25.0129	-58.6132	13	7	3.45942	0	0	0	0	0.203573	1	0.000675615	0.00580847	FALSE	FALSE	FALSE
NR3C1	7.13913e-13	9.07544e-12	-44.1411	-78.5507	13	7	23.6256	0	0	0	0	0.378997	1	2.04226e-38	2.84767e-36	FALSE	TRUE	FALSE
NR5A2	5.70396e-66	7.06974e-64	-26.174	-185.869	13	7	15.7471	0	0	0	0	0.857262	1	0.0722318	0.225773	FALSE	FALSE	FALSE
NRBF2	3.34831e-08	2.59378e-07	-57.6164	-80.4821	13	7	34.9383	0	0	0	0	0.992045	1	0.999775	1	FALSE	FALSE	FALSE
NRCAM	1.10315e-31	4.51582e-30	-32.2616	-111.624	13	7	23.5929	0	0	0	0	0.331319	1	1.93968e-14	7.79718e-13	FALSE	TRUE	FALSE
NRDE2	7.56094e-07	4.70529e-06	-23.2116	-42.6509	13	7	3.96903	0	0	0	0	0.594476	1	0.550827	0.831177	FALSE	FALSE	FALSE
NRP1	5.59097e-14	7.79591e-13	-46.3786	-83.4818	13	7	24.1324	0	0	0	0	0.91379	1	0.000648061	0.00558234	FALSE	FALSE	FALSE
NSFL1C	3.22349e-07	2.10897e-06	-41.4012	-61.783	13	7	13.904	0	0	0	0	0.980865	1	0.00012573	0.00133431	FALSE	FALSE	FALSE
NTS	5.24855e-06	2.93472e-05	-23.9506	-41.2295	13	7	3.54372	0	0	0	0	1	1	1	1	FALSE	FALSE	FALSE
NUCKS1	0.00136833	0.00487659	-44.7671	-55.6204	13	7	15.475	0	0	0	0	0.415833	1	0.417915	0.716367	FALSE	FALSE	FALSE
NUDT14	0.000328406	0.00135623	-24.3698	-36.9155	13	7	2.94205	0	0	0	0	0.592412	1	0.57358	0.846864	FALSE	FALSE	FALSE
NUP107	1.1909e-05	6.34102e-05	-42.8215	-59.1778	13	7	12.9113	0	0	0	0	0.991037	1	0.0722555	0.225773	FALSE	FALSE	FALSE
NUP155	0.00161097	0.0056422	-24.0648	-34.7217	13	7	3.2526	0	0	0	0	0.145163	1	0.38518	0.683706	FALSE	FALSE	FALSE
NUP160	1.24955e-07	8.67105e-07	-27.2895	-48.714	13	7	3.66142	0	0	0	0	0.537902	1	0.912182	1	FALSE	FALSE	FALSE
NUP42	1.96583e-38	1.0697e-36	-37.233	-132.496	13	7	14.3569	0	0	0	0	0.958441	1	4.5785e-06	6.81886e-05	FALSE	TRUE	FALSE
NUP98	0.000109163	0.000499576	-33.1577	-46.9846	13	7	5.081	0	0	0	0	0.439157	1	4.76401e-06	7.04528e-05	FALSE	TRUE	FALSE
NUPR1	5.92713e-07	3.74359e-06	-18.2684	-37.9773	13	7	3.67247	0	0	0	0	0.999738	1	0.00166618	0.0125423	FALSE	FALSE	FALSE
NUTF2	0.00226348	0.00763364	-46.297	-56.5425	13	7	16.0084	0	0	0	0	0.971149	1	0.00841307	0.0469826	FALSE	FALSE	FALSE
NXT1	2.33132e-05	0.000117674	-17.3575	-32.9527	13	7	2.4184	0	0	0	0	1	1	0.0162998	0.0777028	FALSE	FALSE	FALSE
OASL	1.14103e-55	1.10679e-53	-38.6584	-174.31	13	7	211.157	0	0	0	0	0.0715296	1	8.5888e-71	2.55488e-68	FALSE	TRUE	FALSE
OAZ1	0.000137293	0.000612604	-64.7237	-78.2854	13	7	92.094	0	0	0	0	0.0254567	1	5.32045e-06	7.75812e-05	FALSE	TRUE	FALSE
OCEL1	1.19882e-05	6.36803e-05	-19.8382	-36.187	13	7	2.30641	0	0	0	0	0.554262	1	0.945445	1	FALSE	FALSE	FALSE
OGDHL	0.000200524	0.000861981	-24.3839	-37.5057	13	7	3.07508	0	0	0	0	0.775007	1	0.79673	0.984457	FALSE	FALSE	FALSE
OLA1	8.67738e-12	9.82702e-11	-52.6552	-84.4114	13	7	42.9887	0	0	0	0	0.404376	1	0.967373	1	FALSE	FALSE	FALSE
OLFM4	0.00230104	0.0077372	-15.4527	-25.6783	13	7	2.29561	0	0	0	0	1	1	1	1	FALSE	FALSE	FALSE
OPA1	0.00020804	0.000890859	-39.2975	-52.3765	13	7	9.78744	0	0	0	0	0.98934	1	0.144062	0.362757	FALSE	FALSE	FALSE
OSBPL1A	0.000134642	0.00060258	-36.6657	-50.25	13	7	9.0552	0	0	0	0	0.996462	1	0.019412	0.0878463	FALSE	FALSE	FALSE
OSER1	9.13345e-08	6.45855e-07	-40.0404	-61.8087	13	7	12.6308	0	0	0	0	0.0189439	1	6.35225e-09	1.46102e-07	FALSE	TRUE	FALSE
OVCA2	1.41214e-05	7.36093e-05	-34.1226	-50.2862	13	7	6.41872	0	0	0	0	0.964419	1	0.901368	1	FALSE	FALSE	FALSE
OXA1L	5.96055e-07	3.75649e-06	-32.3587	-52.0613	13	7	8.78031	0	0	0	0	0.999908	1	0.030202	0.121297	FALSE	FALSE	FALSE
P3H1	4.61053e-08	3.46333e-07	-26.4974	-49.0138	13	7	4.26264	0	0	0	0	0.962594	1	0.385712	0.684041	FALSE	FALSE	FALSE
P3H2	1.88491e-05	9.66721e-05	-29.3556	-45.1921	13	7	3.41833	0	0	0	0	0.772441	1	0.160167	0.386923	FALSE	FALSE	FALSE
P4HB	0.00294268	0.00963334	-75.9084	-85.8343	13	7	116.891	0	0	0	0	0.513608	1	2.12733e-05	0.000275135	FALSE	TRUE	FALSE
PA2G4	1.07146e-21	2.42682e-20	-58.2106	-113.877	13	7	68.9797	0	0	0	0	0.302241	1	0.00468793	0.0295863	FALSE	FALSE	FALSE
PAAF1	0.00264184	0.00875774	-22.1423	-32.1998	13	7	2.68047	0	0	0	0	1	1	0.0165995	0.0786276	FALSE	FALSE	FALSE
PABPC1	1.622e-34	7.38508e-33	-67.4705	-153.515	13	7	125.635	0	0	0	0	0.839356	1	0.00404693	0.0260193	FALSE	FALSE	FALSE
PABPN1	8.91894e-06	4.79474e-05	-35.5229	-52.2054	13	7	8.38775	0	0	0	0	0.57114	1	0.483117	0.777939	FALSE	FALSE	FALSE
PACSIN2	0.00128873	0.00462245	-24.7217	-35.6469	13	7	2.71385	0	0	0	0	0.954495	1	0.618488	0.884517	FALSE	FALSE	FALSE
PALLD	1.57971e-11	1.75778e-10	-31.0174	-62.1352	13	7	6.4395	0	0	0	0	0.704263	1	0.225253	0.486721	FALSE	FALSE	FALSE
PAPOLA	2.22134e-22	5.56833e-21	-68.7944	-126.091	13	7	132.81	0	0	0	0	0.738651	1	0.00885914	0.0488569	FALSE	FALSE	FALSE
PARD3	2.52716e-67	3.22176e-65	-40.0059	-202.857	13	7	40.6903	0	0	0	0	0.968178	1	0.00596587	0.0358756	FALSE	FALSE	FALSE
PARP14	2.01031e-18	3.80084e-17	-26.9588	-74.7911	13	7	5.73825	0	0	0	0	1	1	5.46895e-25	4.43681e-23	FALSE	TRUE	FALSE
PARVB	0.00273988	0.00902905	-29.3636	-39.3767	13	7	6.5012	0	0	0	0	0.698366	1	0.0275921	0.114102	FALSE	FALSE	FALSE
PCBD1	9.84288e-50	8.28659e-48	-46.8961	-168.666	13	7	41.988	0	0	0	0	0.88246	1	0.907321	1	FALSE	FALSE	FALSE
PCCA	7.23836e-61	8.28143e-59	-44.7812	-192.571	13	7	32.4387	0	0	0	0	0.939905	1	0.743243	0.961261	FALSE	FALSE	FALSE
PCED1A	6.42269e-05	0.000302939	-24.1872	-38.625	13	7	2.38644	0	0	0	0	0.785352	1	0.0137308	0.068762	FALSE	FALSE	FALSE
PCGF2	0.00095573	0.00351564	-24.4592	-35.7421	13	7	2.85884	0	0	0	0	0.419231	1	0.130912	0.340599	FALSE	FALSE	FALSE
PCM1	1.97923e-06	1.17282e-05	-63.6185	-81.9883	13	7	51.8354	0	0	0	0	0.991062	1	0.855011	1	FALSE	FALSE	FALSE
PCMT1	1.35683e-05	7.11421e-05	-49.1037	-65.3125	13	7	19.7217	0	0	0	0	0.428221	1	0.596354	0.865433	FALSE	FALSE	FALSE
PCNA	1.78208e-05	9.18205e-05	-40.1435	-56.0436	13	7	13.8019	0	0	0	0	0.243887	1	0.474246	0.769535	FALSE	FALSE	FALSE
PCOLCE	1.45744e-28	4.85304e-27	-29.0881	-101.071	13	7	11.0891	0	0	0	0	0.999997	1	0.00827676	0.0463374	FALSE	FALSE	FALSE
PDE4A	1.34905e-30	5.10126e-29	-31.2333	-108.027	13	7	16.4217	0	0	0	0	0.848842	1	0.834658	1	FALSE	FALSE	FALSE
PDE4DIP	0.000833271	0.00311685	-26.6897	-38.136	13	7	2.80215	0	0	0	0	0.861502	1	0.608286	0.875257	FALSE	FALSE	FALSE
PDE5A	4.09493e-10	3.94635e-09	-21.9955	-49.6288	13	7	2.76285	0	0	0	0	0.200825	1	0.63583	0.895824	FALSE	FALSE	FALSE
PDHA2	2.01917e-12	2.44825e-11	-20.9701	-54.2768	13	7	4.54743	0	0	0	0	1	1	1	1	FALSE	FALSE	FALSE
PDIA4	3.46497e-08	2.6795e-07	-49.1478	-71.9761	13	7	29.4477	0	0	0	0	0.552192	1	0.0219347	0.0962368	FALSE	FALSE	FALSE
PDIA6	0.000824325	0.00308828	-47.5955	-59.0547	13	7	20.5677	0	0	0	0	0.675883	1	0.633804	0.894531	FALSE	FALSE	FALSE
PDLIM2	1.85617e-10	1.87381e-09	-20.052	-48.5349	13	7	5.01368	0	0	0	0	1	1	3.74792e-05	0.000456719	FALSE	TRUE	FALSE
PDLIM4	0.00139239	0.00495047	-17.2262	-28.0586	13	7	1.98495	0	0	0	0	1	1	1	1	FALSE	FALSE	FALSE
PDLIM5	1.58019e-72	2.27446e-70	-40.1492	-215.125	13	7	29.2625	0	0	0	0	0.833141	1	0.209508	0.464855	FALSE	FALSE	FALSE
PELI1	4.39017e-13	5.71106e-12	-33.6585	-68.5832	13	7	12.441	0	0	0	0	0.259796	1	1.78792e-10	4.8943e-09	FALSE	TRUE	FALSE
PENK	3.62181e-33	1.5391e-31	-39.2569	-122.121	13	7	28.8028	0	0	0	0	0.592605	1	0.991809	1	FALSE	FALSE	FALSE
PER1	4.82532e-05	0.000232512	-22.3176	-37.0832	13	7	8.69431	0	0	0	0	0.999916	1	8.35181e-13	2.72013e-11	FALSE	TRUE	FALSE
PERP	6.90506e-07	4.3273e-06	-39.9897	-59.5295	13	7	14.2805	0	0	0	0	0.00703995	1	0.000363847	0.00336125	FALSE	FALSE	FALSE
PFDN5	0.000168777	0.000741222	-46.8425	-60.1648	13	7	23.3949	0	0	0	0	0.353708	1	5.95336e-05	0.000699049	FALSE	TRUE	FALSE
PFKL	0.00208066	0.00706539	-32.2489	-42.5966	13	7	6.91538	0	0	0	0	0.160638	1	0.00516684	0.0318872	FALSE	FALSE	FALSE
PFKM	1.93827e-06	1.15008e-05	-28.2376	-46.6307	13	7	3.52232	0	0	0	0	0.330038	1	0.747453	0.96413	FALSE	FALSE	FALSE
PGD	3.19257e-21	6.88176e-20	-33.6461	-88.1808	13	7	16.8362	0	0	0	0	0.941316	1	2.34412e-12	7.26351e-11	FALSE	TRUE	FALSE
PGLS	0.000270566	0.00113358	-42.8153	-55.5878	13	7	17.1018	0	0	0	0	0.439478	1	0.000112527	0.00120407	FALSE	FALSE	FALSE
PGM1	2.90086e-06	1.67663e-05	-37.8929	-55.8359	13	7	14.502	0	0	0	0	0.999999	1	1.9787e-07	3.67874e-06	FALSE	TRUE	FALSE
PGM2	1.45606e-08	1.18992e-07	-31.9696	-55.7426	13	7	8.35538	0	0	0	0	0.849035	1	0.155525	0.379019	FALSE	FALSE	FALSE
PHAX	0.000143441	0.000637483	-38.5604	-52.0714	13	7	10.0244	0	0	0	0	0.207905	1	0.931679	1	FALSE	FALSE	FALSE
PHB2	0.00219056	0.00741599	-45.1517	-55.437	13	7	17.2274	0	0	0	0	0.890374	1	0.148285	0.3684	FALSE	FALSE	FALSE
PHKG2	3.1539e-17	5.5844e-16	-38.5343	-83.4924	13	7	16.2599	0	0	0	0	0.569164	1	0.300327	0.589556	FALSE	FALSE	FALSE
PHLDB1	0.000141672	0.000631509	-25.4432	-38.9686	13	7	3.46161	0	0	0	0	0.999811	1	0.767276	0.975103	FALSE	FALSE	FALSE
PHLDB2	3.30119e-12	3.91752e-11	-38.4481	-71.2326	13	7	11.8182	0	0	0	0	0.172578	1	6.8048e-06	9.66976e-05	FALSE	TRUE	FALSE
PHOSPHO2	5.17516e-08	3.84859e-07	-31.0468	-53.4369	13	7	7.37457	0	0	0	0	0.999932	1	0.0909706	0.266604	FALSE	FALSE	FALSE
PHPT1	0.0019153	0.00656379	-44.0414	-54.4894	13	7	19.0486	0	0	0	0	0.826595	1	0.00686903	0.0399083	FALSE	FALSE	FALSE
PHYHIPL	0.00193147	0.00660409	-16.6441	-27.0819	13	7	1.74231	0	0	0	0	1	1	1	1	FALSE	FALSE	FALSE
PICALM	0.000522844	0.00205726	-29.9255	-41.9242	13	7	4.65978	0	0	0	0	0.56345	1	0.160438	0.386958	FALSE	FALSE	FALSE
PIGT	7.9486e-09	6.72992e-08	-33.2122	-57.6428	13	7	8.04435	0	0	0	0	0.999998	1	0.0010172	0.00820746	FALSE	FALSE	FALSE
PIK3C3	0.000925516	0.00342142	-62.8743	-74.1956	13	7	39.607	0	0	0	0	0.982356	1	0.000950346	0.00778093	FALSE	FALSE	FALSE
PIK3R1	2.59036e-05	0.000130013	-29.8995	-45.3749	13	7	3.82224	0	0	0	0	0.999999	1	2.68933e-13	9.2306e-12	FALSE	TRUE	FALSE
PIR	4.70276e-06	2.64848e-05	-34.1834	-51.5855	13	7	8.51311	0	0	0	0	1	1	0.000371897	0.00341441	FALSE	FALSE	FALSE
PITRM1	9.33818e-08	6.59287e-07	-30.1379	-51.8819	13	7	6.40615	0	0	0	0	0.859487	1	0.571384	0.846779	FALSE	FALSE	FALSE
PKN1	5.66706e-19	1.10905e-17	-40.0036	-89.1555	13	7	14.0308	0	0	0	0	0.543371	1	0.744031	0.961436	FALSE	FALSE	FALSE
PKP2	6.21124e-08	4.54337e-07	-24.4066	-46.5971	13	7	2.95347	0	0	0	0	0.679067	1	0.396062	0.695759	FALSE	FALSE	FALSE
PLA2R1	2.0683e-07	1.39407e-06	-18.0811	-38.9517	13	7	2.60903	0	0	0	0	1	1	1	1	FALSE	FALSE	FALSE
PLAAT3	9.12114e-18	1.65441e-16	-36.0542	-82.3085	13	7	15.8073	0	0	0	0	1	1	0.0456239	0.163776	FALSE	FALSE	FALSE
PLAU	2.40383e-07	1.59612e-06	-31.8636	-52.5687	13	7	6.48941	0	0	0	0	0.999978	1	0.0156989	0.0754833	FALSE	FALSE	FALSE
PLAUR	1.94659e-09	1.75468e-08	-38.9536	-64.9073	13	7	10.5315	0	0	0	0	0.198944	1	0.00216377	0.0154476	FALSE	FALSE	FALSE
PLCB4	8.73109e-40	4.86976e-38	-46.469	-144.912	13	7	31.0641	0	0	0	0	0.674915	1	1.2783e-41	1.96682e-39	FALSE	TRUE	FALSE
PLEKHA5	0.000255001	0.00107534	-36.2188	-49.0605	13	7	8.16859	0	0	0	0	0.122343	1	0.0608732	0.201048	FALSE	FALSE	FALSE
PLEKHH2	2.69971e-05	0.000135046	-24.4714	-39.8997	13	7	3.36337	0	0	0	0	0.698133	1	0.777818	0.98001	FALSE	FALSE	FALSE
PLOD2	6.5882e-08	4.79552e-07	-45.3711	-67.4972	13	7	17.3533	0	0	0	0	0.154442	1	0.114131	0.312232	FALSE	FALSE	FALSE
PLP2	2.27468e-05	0.000115075	-55.2219	-70.845	13	7	35.736	0	0	0	0	1	1	0.00109564	0.00879273	FALSE	FALSE	FALSE
PLPP1	6.82486e-09	5.79679e-08	-36.6983	-61.2942	13	7	15.8233	0	0	0	0	0.988469	1	5.69466e-08	1.11937e-06	FALSE	TRUE	FALSE
PLS1	8.25854e-06	4.45043e-05	-20.2991	-37.0683	13	7	2.62041	0	0	0	0	1	1	1	1	FALSE	FALSE	FALSE
PLS3	3.93219e-10	3.79771e-09	-46.118	-73.7949	13	7	16.7598	0	0	0	0	0.997693	1	0.0104366	0.0550449	FALSE	FALSE	FALSE
PLSCR1	3.57582e-08	2.75092e-07	-44.5057	-67.2997	13	7	15.7304	0	0	0	0	0.728356	1	7.36076e-05	0.000844111	FALSE	TRUE	FALSE
PM20D2	0.00240957	0.00805783	-19.9454	-30.115	13	7	1.91867	0	0	0	0	0.999896	1	0.668206	0.918847	FALSE	FALSE	FALSE
PMAIP1	0.000853816	0.00318539	-52.4609	-63.8781	13	7	46.932	0	0	0	0	0.0791537	1	1.62837e-25	1.42466e-23	FALSE	TRUE	FALSE
PMPCB	7.54551e-16	1.21545e-14	-57.4864	-99.1194	13	7	52.0757	0	0	0	0	0.553434	1	0.863818	1	FALSE	FALSE	FALSE
PMS2	8.79783e-16	1.402e-14	-37.6015	-79.0734	13	7	11.8342	0	0	0	0	0.46833	1	0.0328181	0.128856	FALSE	FALSE	FALSE
PNISR	0.0029343	0.00961396	-40.8689	-50.7983	13	7	11.6409	0	0	0	0	0.0264829	1	0.38537	0.683706	FALSE	FALSE	FALSE
POLDIP2	0.000106635	0.000490457	-44.5301	-58.3841	13	7	17.7335	0	0	0	0	0.890217	1	0.273644	0.55373	FALSE	FALSE	FALSE
POLE4	7.59376e-06	4.13212e-05	-29.6513	-46.515	13	7	5.79569	0	0	0	0	0.224119	1	0.392787	0.691639	FALSE	FALSE	FALSE
POLG	1.53245e-06	9.17827e-06	-36.8185	-55.4732	13	7	7.89733	0	0	0	0	0.296346	1	0.971092	1	FALSE	FALSE	FALSE
POLR2L	0.00140525	0.00498823	-61.8126	-72.634	13	7	55.5836	0	0	0	0	1	1	5.90214e-07	1.02075e-05	FALSE	TRUE	FALSE
POMGNT1	5.48912e-12	6.36168e-11	-22.7812	-55.025	13	7	4.68796	0	0	0	0	0.943557	1	0.0290661	0.118437	FALSE	FALSE	FALSE
POMP	1.16875e-05	6.23801e-05	-42.7484	-59.1259	13	7	17.5304	0	0	0	0	0.244805	1	0.000727882	0.00618631	FALSE	FALSE	FALSE
PON2	0.00291518	0.00957844	-41.0855	-51.0229	13	7	16.199	0	0	0	0	0.712922	1	0.0115793	0.0599382	FALSE	FALSE	FALSE
POPDC3	4.57022e-27	1.46707e-25	-30.0664	-98.5045	13	7	13.7452	0	0	0	0	0.612476	1	2.0859e-10	5.67519e-09	FALSE	TRUE	FALSE
PPARG	1.22049e-30	4.69469e-29	-33.4783	-110.374	13	7	18.4672	0	0	0	0	0.582285	1	0.533221	0.818427	FALSE	FALSE	FALSE
PPDPF	0.00147985	0.00522395	-45.0901	-55.8493	13	7	20.0665	0	0	0	0	0.926809	1	0.00318447	0.0212711	FALSE	FALSE	FALSE
PPM1G	3.01695e-06	1.73923e-05	-44.179	-62.0781	13	7	21.6159	0	0	0	0	0.109453	1	0.0047131	0.0296908	FALSE	FALSE	FALSE
PPM1K	5.6871e-23	1.48397e-21	-21.6584	-80.3657	13	7	7.55116	0	0	0	0	0.137557	1	3.33933e-33	4.13892e-31	FALSE	TRUE	FALSE
PPP1R12A	1.58741e-29	5.5336e-28	-64.9771	-139.239	13	7	127.043	0	0	0	0	0.644446	1	0.417175	0.716367	FALSE	FALSE	FALSE
PPP1R15A	8.61353e-40	4.86501e-38	-55.0529	-153.509	13	7	79.5435	0	0	0	0	0.000774601	0.38403	6.99703e-42	1.15632e-39	FALSE	TRUE	FALSE
PPP1R9A	0.000506592	0.00199683	-28.743	-40.779	13	7	3.70145	0	0	0	0	0.821224	1	0.796173	0.984457	FALSE	FALSE	FALSE
PPP2R1B	0.00274763	0.0090479	-23.8775	-33.8871	13	7	2.56932	0	0	0	0	0.682548	1	0.774898	0.980002	FALSE	FALSE	FALSE
PPP2R3C	1.62801e-09	1.48248e-08	-54.897	-81.0436	13	7	32.1363	0	0	0	0	0.508296	1	0.0155192	0.0748614	FALSE	FALSE	FALSE
PPP4R3A	5.12356e-05	0.000245821	-33.3196	-48.0165	13	7	6.60659	0	0	0	0	0.982874	1	0.844305	1	FALSE	FALSE	FALSE
PRDX1	0.000275214	0.00114874	-66.6778	-79.4303	13	7	118.57	0	0	0	0	0.362215	1	2.17527e-25	1.83133e-23	FALSE	TRUE	FALSE
PRDX2	3.76306e-13	4.93846e-12	-34.5316	-69.6195	13	7	10.5821	0	0	0	0	0.887669	1	0.00056841	0.00501234	FALSE	FALSE	FALSE
PRMT3	1.86844e-15	2.92525e-14	-32.3411	-73.0223	13	7	6.98649	0	0	0	0	0.958987	1	5.54958e-28	5.26856e-26	FALSE	TRUE	FALSE
PRNP	2.65414e-07	1.74672e-06	-25.517	-46.113	13	7	6.43686	0	0	0	0	0.641308	1	4.54561e-06	6.80621e-05	FALSE	TRUE	FALSE
PRPF31	5.93168e-07	3.74359e-06	-20.6062	-40.3142	13	7	3.35336	0	0	0	0	1	1	1	1	FALSE	FALSE	FALSE
PRPF4B	9.51782e-30	3.34398e-28	-48.5578	-123.345	13	7	55.0549	0	0	0	0	0.0369032	1	7.13035e-05	0.000822109	FALSE	TRUE	FALSE
PRPF6	6.32177e-20	1.28217e-18	-49.861	-101.295	13	7	34.5324	0	0	0	0	0.660376	1	0.123283	0.328608	FALSE	FALSE	FALSE
PRRC1	5.76355e-06	3.18674e-05	-34.1148	-51.2886	13	7	7.80402	0	0	0	0	0.0887269	1	0.00669972	0.0391285	FALSE	FALSE	FALSE
PRSS23	8.53428e-14	1.17531e-12	-41.1105	-77.7672	13	7	15.032	0	0	0	0	0.0968877	1	0.242071	0.509693	FALSE	FALSE	FALSE
PRXL2A	1.44959e-06	8.7171e-06	-20.3358	-39.0523	13	7	3.04239	0	0	0	0	1	1	1	1	FALSE	FALSE	FALSE
PSAP	0.00014478	0.000642157	-59.9863	-73.4865	13	7	41.8855	0	0	0	0	0.0823181	1	0.437563	0.736787	FALSE	FALSE	FALSE
PSENEN	3.34673e-05	0.0001641	-34.2545	-49.4381	13	7	8.303	0	0	0	0	0.99979	1	0.051191	0.177156	FALSE	FALSE	FALSE
PSIP1	5.02566e-08	3.74992e-07	-32.4552	-54.8773	13	7	9.31482	0	0	0	0	0.999844	1	0.045775	0.164187	FALSE	FALSE	FALSE
PSMA3	2.38327e-30	8.78854e-29	-66.4631	-142.672	13	7	101.606	0	0	0	0	0.59789	1	0.774164	0.979393	FALSE	FALSE	FALSE
PSMA7	3.81574e-05	0.000186075	-74.7093	-89.7432	13	7	156.527	0	0	0	0	0.327144	1	1.96971e-14	7.84718e-13	FALSE	TRUE	FALSE
PSMB4	6.56215e-08	4.78436e-07	-70.041	-92.1714	13	7	169.872	0	0	0	0	0.275058	1	1.4493e-13	5.17343e-12	FALSE	TRUE	FALSE
PSMB5	0.00288747	0.00950139	-50.9484	-60.8974	13	7	34.1929	0	0	0	0	1	1	3.87624e-06	5.903e-05	FALSE	TRUE	FALSE
PSMB8	2.21084e-05	0.000112178	-36.4917	-52.1471	13	7	7.10503	0	0	0	0	0.789049	1	0.99471	1	FALSE	FALSE	FALSE
PSMB9	0.00160241	0.00562103	-27.4525	-38.1158	13	7	3.40796	0	0	0	0	0.610601	1	0.987297	1	FALSE	FALSE	FALSE
PSMC2	0.00155105	0.00545372	-69.4419	-80.1445	13	7	77.0449	0	0	0	0	0.195992	1	0.90466	1	FALSE	FALSE	FALSE
PSMC3	2.01724e-09	1.81105e-08	-50.5722	-76.4873	13	7	35.0569	0	0	0	0	0.24331	1	0.00218372	0.0155651	FALSE	FALSE	FALSE
PSMC4	3.21751e-12	3.83864e-11	-48.3119	-81.1237	13	7	23.2455	0	0	0	0	0.990757	1	0.237841	0.503676	FALSE	FALSE	FALSE
PSMC5	0.000170782	0.000747088	-40.7249	-54.0334	13	7	15.1478	0	0	0	0	0.439205	1	3.42852e-05	0.000422599	FALSE	TRUE	FALSE
PSMD6	7.58814e-25	2.22752e-23	-58.2075	-121.376	13	7	54.4864	0	0	0	0	0.0456101	1	0.815824	0.995793	FALSE	FALSE	FALSE
PSMD7	8.63478e-08	6.12534e-07	-76.8058	-98.6355	13	7	130.507	0	0	0	0	0.080168	1	0.414952	0.714594	FALSE	FALSE	FALSE
PSME1	4.13196e-05	0.0002004	-54.6398	-69.5828	13	7	29.4938	0	0	0	0	0.820684	1	0.554662	0.834706	FALSE	FALSE	FALSE
PSMF1	1.29037e-08	1.06229e-07	-37.5205	-61.4248	13	7	10.0016	0	0	0	0	0.544654	1	0.911497	1	FALSE	FALSE	FALSE
PSMG3	4.14942e-08	3.13809e-07	-34.5648	-57.1963	13	7	9.19748	0	0	0	0	0.060684	1	0.19598	0.444762	FALSE	FALSE	FALSE
PTEN	2.96179e-06	1.70964e-05	-38.5161	-56.4359	13	7	7.82537	0	0	0	0	0.0135879	1	2.49972e-06	3.9712e-05	FALSE	TRUE	FALSE
PTGR1	2.09061e-05	0.000106488	-46.6377	-62.3567	13	7	33.3112	0	0	0	0	0.972386	1	1.60025e-08	3.48307e-07	FALSE	TRUE	FALSE
PTGS2	2.48802e-41	1.50021e-39	-24.0808	-126.153	13	7	16.7424	0	0	0	0	0.995562	1	8.75295e-61	2.05556e-58	FALSE	TRUE	FALSE
PTOV1	0.00130974	0.00469025	-27.2013	-38.1072	13	7	3.93672	0	0	0	0	0.368666	1	0.0709095	0.222973	FALSE	FALSE	FALSE
PTPMT1	0.000190453	0.000825051	-38.156	-51.3378	13	7	13.1974	0	0	0	0	0.19412	1	0.135459	0.348054	FALSE	FALSE	FALSE
PTPN13	0.00160506	0.0056259	-31.7929	-42.4542	13	7	4.83103	0	0	0	0	0.62185	1	0.949825	1	FALSE	FALSE	FALSE
PTPN4	1.55694e-09	1.42067e-08	-38.5399	-64.7347	13	7	16.0565	0	0	0	0	0.925877	1	0.69583	0.934358	FALSE	FALSE	FALSE
PTPRK	0.000126431	0.000569716	-49.0936	-62.7507	13	7	17.042	0	0	0	0	0.677687	1	0.295748	0.582874	FALSE	FALSE	FALSE
PTS	0.000797817	0.0030041	-26.2145	-37.7125	13	7	3.50073	0	0	0	0	0.947744	1	0.285323	0.57016	FALSE	FALSE	FALSE
PUF60	1.33372e-07	9.22644e-07	-41.7096	-63.0625	13	7	17.7999	0	0	0	0	0.429285	1	3.06211e-05	0.000382721	FALSE	TRUE	FALSE
PUM2	0.000333591	0.00137187	-37.7339	-50.2612	13	7	9.54623	0	0	0	0	0.98017	1	0.585909	0.857437	FALSE	FALSE	FALSE
PXK	0.000859089	0.00320058	-28.3115	-39.7215	13	7	3.18881	0	0	0	0	0.515699	1	0.913576	1	FALSE	FALSE	FALSE
PYCARD	5.15628e-15	7.79909e-14	-16.7409	-56.3551	13	7	4.70276	0	0	0	0	1	1	0.00630688	0.0372239	FALSE	FALSE	FALSE
PYCR1	9.2858e-11	9.70333e-10	-27.6032	-56.8284	13	7	7.12103	0	0	0	0	0.181979	1	0.000246035	0.00239696	FALSE	FALSE	FALSE
PYGL	5.54915e-14	7.76185e-13	-38.6948	-75.8059	13	7	13.3916	0	0	0	0	0.630468	1	0.471381	0.767071	FALSE	FALSE	FALSE
R3HDM1	9.0969e-09	7.64414e-08	-66.6485	-90.9326	13	7	68.5377	0	0	0	0	0.434887	1	0.00222106	0.0157308	FALSE	FALSE	FALSE
RAB27A	6.27125e-11	6.67835e-10	-18.687	-48.3324	13	7	2.84205	0	0	0	0	0.917565	1	0.673539	0.92075	FALSE	FALSE	FALSE
RAB31	2.27757e-20	4.70487e-19	-30.2643	-82.7593	13	7	11.638	0	0	0	0	0.57758	1	2.54232e-06	4.02263e-05	FALSE	TRUE	FALSE
RAB5IF	2.07848e-33	8.91749e-32	-42.6583	-126.091	13	7	32.0152	0	0	0	0	0.90124	1	1.15256e-14	4.76177e-13	FALSE	TRUE	FALSE
RACK1	7.06907e-58	7.16868e-56	-89.17	-229.98	13	7	635.922	0	0	0	0	0.380875	1	9.05238e-08	1.73355e-06	FALSE	TRUE	FALSE
RAD1	3.38629e-06	1.93465e-05	-19.5867	-37.3567	13	7	3.45427	0	0	0	0	0.575647	1	0.00546785	0.0333755	FALSE	FALSE	FALSE
RAD21	6.03796e-11	6.4453e-10	-50.2372	-79.9231	13	7	31.4344	0	0	0	0	0.796356	1	0.636414	0.895824	FALSE	FALSE	FALSE
RAD52	0.00268153	0.00887611	-26.4355	-36.4748	13	7	2.98957	0	0	0	0	0.985069	1	0.422896	0.720215	FALSE	FALSE	FALSE
RALBP1	0.000469647	0.0018677	-36.3068	-48.4321	13	7	8.87084	0	0	0	0	1	1	0.000738445	0.00625226	FALSE	FALSE	FALSE
RALGAPB	3.13784e-05	0.000154879	-48.9844	-64.2414	13	7	21.3873	0	0	0	0	0.468277	1	0.0425328	0.155558	FALSE	FALSE	FALSE
RALY	0.00038654	0.00156936	-34.6758	-47.0302	13	7	7.80962	0	0	0	0	1	1	0.0029872	0.0201953	FALSE	FALSE	FALSE
RANBP3	1.42926e-08	1.17016e-07	-29.1922	-52.9854	13	7	6.39687	0	0	0	0	0.770743	1	0.0256647	0.108136	FALSE	FALSE	FALSE
RARS1	0.0004908	0.00193972	-45.3375	-57.4108	13	7	18.9365	0	0	0	0	0.133866	1	0.00736726	0.0421523	FALSE	FALSE	FALSE
RB1CC1	0.00187164	0.006429	-44.1206	-54.5965	13	7	14.287	0	0	0	0	0.701152	1	0.83799	1	FALSE	FALSE	FALSE
RBBP6	6.09447e-07	3.83547e-06	-79.6592	-99.3373	13	7	173.025	0	0	0	0	0.309174	1	0.0402742	0.149753	FALSE	FALSE	FALSE
RBCK1	1.61989e-05	8.40459e-05	-32.1931	-48.2013	13	7	5.65808	0	0	0	0	0.895224	1	0.304159	0.592645	FALSE	FALSE	FALSE
RBFA	0.00101244	0.00369984	-32.5316	-43.7457	13	7	7.38811	0	0	0	0	1	1	0.0345048	0.134112	FALSE	FALSE	FALSE
RBFOX2	0.000233455	0.000990188	-38.2612	-51.2059	13	7	7.78373	0	0	0	0	0.999792	1	1.35675e-05	0.000184568	FALSE	TRUE	FALSE
RBKS	0.00149548	0.00527495	-17.5024	-28.2489	13	7	1.76799	0	0	0	0	0.771397	1	0.789414	0.982265	FALSE	FALSE	FALSE
RBM25	3.55905e-15	5.41996e-14	-48.9289	-88.933	13	7	28.4032	0	0	0	0	0.791248	1	0.27028	0.549645	FALSE	FALSE	FALSE
RBM3	0.000425586	0.00171087	-36.8456	-49.0868	13	7	9.44952	0	0	0	0	0.8687	1	0.447006	0.744596	FALSE	FALSE	FALSE
RBM39	5.70685e-08	4.2299e-07	-61.7711	-84.0543	13	7	84.5607	0	0	0	0	0.872883	1	4.23608e-20	2.48702e-18	FALSE	TRUE	FALSE
RBM45	0.000990347	0.00362802	-29.4492	-40.6896	13	7	4.62828	0	0	0	0	0.0985397	1	0.765253	0.972809	FALSE	FALSE	FALSE
RBM5	4.75762e-16	7.83339e-15	-53.3696	-95.4865	13	7	30.5906	0	0	0	0	0.778927	1	5.55568e-09	1.28443e-07	FALSE	TRUE	FALSE
RBMS3	4.24653e-14	6.0344e-13	-26.6274	-64.0208	13	7	4.69924	0	0	0	0	0.180322	1	0.0246491	0.104947	FALSE	FALSE	FALSE
RBP1	5.04885e-08	3.76093e-07	-20.2362	-42.6533	13	7	3.83705	0	0	0	0	1	1	1	1	FALSE	FALSE	FALSE
RBPJ	0.000574963	0.00223086	-22.3647	-34.2511	13	7	2.80428	0	0	0	0	0.902241	1	0.0440334	0.158962	FALSE	FALSE	FALSE
RBPMS	2.17551e-08	1.73341e-07	-42.72	-66.0558	13	7	15.234	0	0	0	0	0.735234	1	0.239607	0.505752	FALSE	FALSE	FALSE
RELA	0.000686799	0.00261476	-25.827	-37.503	13	7	3.43502	0	0	0	0	0.846568	1	0.977766	1	FALSE	FALSE	FALSE
REV3L	2.91306e-43	1.83072e-41	-43.6164	-150.222	13	7	22.5619	0	0	0	0	0.922858	1	0.000273257	0.00262072	FALSE	FALSE	FALSE
REXO2	0.000620375	0.0023863	-42.7888	-54.5853	13	7	18.9216	0	0	0	0	0.165201	1	7.80278e-05	0.000885903	FALSE	TRUE	FALSE
RFC1	2.57615e-05	0.000129446	-33.1929	-48.6745	13	7	7.20215	0	0	0	0	0.459675	1	0.0931133	0.271002	FALSE	FALSE	FALSE
RGS2	6.72039e-08	4.87583e-07	-29.6792	-51.7834	13	7	6.43532	0	0	0	0	0.658298	1	0.0013081	0.010276	FALSE	FALSE	FALSE
RGS20	0.00018682	0.000812466	-26.3892	-39.5935	13	7	2.77689	0	0	0	0	0.934033	1	0.548715	0.830255	FALSE	FALSE	FALSE
RHOBTB3	7.74017e-12	8.8329e-11	-29.3742	-61.2522	13	7	7.70749	0	0	0	0	0.335132	1	0.000138598	0.0014483	FALSE	FALSE	FALSE
RHOG	8.02091e-05	0.00037515	-26.6477	-40.83	13	7	3.56623	0	0	0	0	0.0357084	1	0.250124	0.520547	FALSE	FALSE	FALSE
RINT1	0.000269647	0.00113079	-35.5764	-48.3529	13	7	5.44438	0	0	0	0	0.7274	1	5.15616e-07	8.98702e-06	FALSE	TRUE	FALSE
RNF103	6.59188e-06	3.61783e-05	-55.244	-72.2669	13	7	37.0047	0	0	0	0	0.310221	1	0.410946	0.711264	FALSE	FALSE	FALSE
RNF128	2.67843e-06	1.55817e-05	-20.8994	-38.9315	13	7	3.13748	0	0	0	0	1	1	1	1	FALSE	FALSE	FALSE
RNF130	0.000126533	0.000569716	-39.0257	-52.6819	13	7	11.6991	0	0	0	0	0.944171	1	0.16025	0.386923	FALSE	FALSE	FALSE
RNF145	0.00102688	0.00374342	-34.7421	-45.9393	13	7	5.78718	0	0	0	0	0.973505	1	0.0478228	0.169132	FALSE	FALSE	FALSE
RNF20	2.77477e-05	0.00013849	-48.1047	-63.5018	13	7	19.8074	0	0	0	0	0.675491	1	0.913982	1	FALSE	FALSE	FALSE
RNF24	1.79321e-07	1.21971e-06	-22.6266	-43.6542	13	7	2.7148	0	0	0	0	0.804356	1	0.628024	0.892152	FALSE	FALSE	FALSE
RNFT1	7.27325e-06	3.97225e-05	-45.3125	-62.2247	13	7	13.4638	0	0	0	0	0.48042	1	0.990917	1	FALSE	FALSE	FALSE
RO60	1.24276e-25	3.67232e-24	-86.2648	-151.3	13	7	560.698	0	0	0	0	0.97627	1	0.662938	0.915515	FALSE	FALSE	FALSE
ROCK2	2.24059e-05	0.000113479	-51.0865	-66.7268	13	7	22.9858	0	0	0	0	1	1	0.00595261	0.0358442	FALSE	FALSE	FALSE
ROMO1	0.000401695	0.00162499	-58.8965	-71.2057	13	7	49.8991	0	0	0	0	1	1	5.68294e-06	8.23383e-05	FALSE	TRUE	FALSE
RP1	0.000714709	0.00271407	-23.867	-35.4957	13	7	2.76507	0	0	0	0	0.450051	1	0.687812	0.929327	FALSE	FALSE	FALSE
RPAP3	2.01633e-07	1.3611e-06	-39.9824	-60.881	13	7	17.3803	0	0	0	0	0.485073	1	0.00568741	0.0345739	FALSE	FALSE	FALSE
RPL15	3.50552e-08	2.70617e-07	-79.6418	-102.457	13	7	201.657	0	0	0	0	0.999996	1	0.140344	0.357633	FALSE	FALSE	FALSE
RPL19	4.8208e-05	0.000232512	-90.4123	-105.179	13	7	246.64	0	0	0	0	0.711516	1	0.256739	0.531095	FALSE	FALSE	FALSE
RPL22L1	3.19557e-06	1.83509e-05	-43.1895	-61.0244	13	7	11.3235	0	0	0	0	0.822079	1	0.553576	0.833608	FALSE	FALSE	FALSE
RPL27	2.75334e-113	1.22854e-110	-84.4824	-354.17	13	7	615.269	0	0	0	0	0.999999	1	1.11474e-08	2.48699e-07	FALSE	TRUE	FALSE
RPL27A	6.17791e-16	1.00974e-14	-78.1263	-119.969	13	7	186.923	0	0	0	0	1	1	1.08292e-07	2.04998e-06	FALSE	TRUE	FALSE
RPL30	0.000187187	0.000813146	-84.7101	-97.9121	13	7	222.562	0	0	0	0	0.998842	1	0.00138026	0.010767	FALSE	FALSE	FALSE
RPL32	2.24661e-08	1.7837e-07	-104.983	-128.284	13	7	1098.23	0	0	0	0	0.966122	1	0.931708	1	FALSE	FALSE	FALSE
RPL5	9.37131e-24	2.53423e-22	-78.9428	-139.515	13	7	218.516	0	0	0	0	0.535489	1	2.829e-05	0.000356582	FALSE	TRUE	FALSE
RPL8	3.95154e-33	1.66337e-31	-74.6063	-157.381	13	7	231.738	0	0	0	0	0.0332983	1	6.52173e-13	2.15555e-11	FALSE	TRUE	FALSE
RPL9	3.64541e-08	2.79002e-07	-70.8932	-93.6661	13	7	89.8308	0	0	0	0	0.80853	1	0.276186	0.55674	FALSE	FALSE	FALSE
RPLP0	3.14624e-91	8.77407e-89	-81.0474	-299.526	13	7	475.976	0	0	0	0	1	1	6.12607e-18	3.00379e-16	FALSE	TRUE	FALSE
RPLP1	1.87394e-05	9.62199e-05	-85.7628	-101.606	13	7	176	0	0	0	0	0.952023	1	0.0291276	0.11845	FALSE	FALSE	FALSE
RPLP2	1.06092e-10	1.09834e-09	-70.8312	-99.9138	13	7	129.895	0	0	0	0	0.932048	1	6.12962e-07	1.056e-05	FALSE	TRUE	FALSE
RPN1	4.73319e-05	0.000229062	-43.0896	-57.8773	13	7	19.2564	0	0	0	0	0.0451866	1	0.00200208	0.0145021	FALSE	FALSE	FALSE
RPN2	1.02599e-08	8.52509e-08	-60.4318	-84.5853	13	7	66.3323	0	0	0	0	0.266199	1	4.79433e-08	9.72378e-07	FALSE	TRUE	FALSE
RPS12	3.11278e-89	7.71625e-87	-83.9878	-297.829	13	7	572.798	0	0	0	0	0.721411	1	0.463361	0.758353	FALSE	FALSE	FALSE
RPS13	8.17022e-10	7.64266e-09	-84.1505	-111.041	13	7	287.514	0	0	0	0	1	1	1.12605e-05	0.000154598	FALSE	TRUE	FALSE
RPS14	3.92173e-09	3.38467e-08	-104.596	-129.792	13	7	765.949	0	0	0	0	1	1	1.93255e-05	0.000254367	FALSE	TRUE	FALSE
RPS15	1.13075e-16	1.94055e-15	-68.6002	-112.222	13	7	99.0425	0	0	0	0	1	1	1.93228e-05	0.000254367	FALSE	TRUE	FALSE
RPS16	1.80363e-14	2.63863e-13	-85.834	-124.13	13	7	235.476	0	0	0	0	1	1	0.0318261	0.126254	FALSE	FALSE	FALSE
RPS19	3.57635e-14	5.13108e-13	-86.1609	-123.735	13	7	283.807	0	0	0	0	0.99993	1	0.0188148	0.0859975	FALSE	FALSE	FALSE
RPS19BP1	7.45527e-08	5.36539e-07	-32.889	-54.8797	13	7	7.65602	0	0	0	0	0.76791	1	0.00484033	0.0303336	FALSE	FALSE	FALSE
RPS2	1.24779e-30	4.75867e-29	-79.6088	-156.482	13	7	272.72	0	0	0	0	0.691108	1	1.38105e-14	5.65344e-13	FALSE	TRUE	FALSE
RPS20	1.44113e-92	4.28687e-90	-73.5624	-295.152	13	7	308.559	0	0	0	0	0.226874	1	0.00166081	0.012539	FALSE	FALSE	FALSE
RPS21	1.68674e-18	3.21635e-17	-61.1156	-109.131	13	7	82.2522	0	0	0	0	0.999975	1	1.38335e-05	0.000187614	FALSE	TRUE	FALSE
RPS23	2.92164e-34	1.30363e-32	-86.9745	-172.416	13	7	527.137	0	0	0	0	1	1	1.81538e-25	1.55774e-23	FALSE	TRUE	FALSE
RPS3	6.62983e-18	1.22241e-16	-77.0191	-123.606	13	7	207.97	0	0	0	0	1	1	2.39093e-10	6.46564e-09	FALSE	TRUE	FALSE
RPS4X	1.1932e-20	2.49956e-19	-73.3779	-126.544	13	7	152.362	0	0	0	0	1	1	7.8322e-10	2.02007e-08	FALSE	TRUE	FALSE
RPS5	2.47597e-31	9.86409e-30	-65.9056	-144.439	13	7	126.902	0	0	0	0	0.999998	1	2.81936e-06	4.42957e-05	FALSE	TRUE	FALSE
RPS6	0.00198561	0.00675921	-91.3014	-101.706	13	7	276.622	0	0	0	0	0.952832	1	0.915605	1	FALSE	FALSE	FALSE
RPS7	1.07792e-52	9.6194e-51	-76.8449	-205.542	13	7	278.287	0	0	0	0	0.145116	1	6.48665e-05	0.000755703	FALSE	TRUE	FALSE
RPS8	0.000685648	0.00261476	-76.5866	-88.2645	13	7	115.597	0	0	0	0	0.7859	1	0.0428137	0.156202	FALSE	FALSE	FALSE
RRAGD	9.66987e-08	6.7948e-07	-22.051	-43.7567	13	7	4.05809	0	0	0	0	1	1	1	1	FALSE	FALSE	FALSE
RRAS	5.42298e-07	3.44682e-06	-34.8842	-54.6915	13	7	11.5351	0	0	0	0	0.971407	1	0.00355369	0.0232091	FALSE	FALSE	FALSE
RRBP1	1.23952e-24	3.56821e-23	-32.7133	-95.3749	13	7	11.4461	0	0	0	0	0.977195	1	0.911596	1	FALSE	FALSE	FALSE
RRP1	0.00056267	0.00218887	-24.6456	-36.5576	13	7	3.16457	0	0	0	0	0.944154	1	0.361969	0.658689	FALSE	FALSE	FALSE
RSAD2	2.6529e-83	5.63678e-81	-32.4914	-232.544	13	7	130.853	0	0	0	0	0.934142	1	2.26496e-119	2.52656e-116	FALSE	TRUE	FALSE
RSL24D1	4.01835e-08	3.05449e-07	-44.3497	-67.0163	13	7	19.3721	0	0	0	0	0.888769	1	0.272728	0.552388	FALSE	FALSE	FALSE
RSPO3	6.80272e-12	7.80302e-11	-24.5294	-56.5448	13	7	5.58899	0	0	0	0	1	1	1	1	FALSE	FALSE	FALSE
RSU1	1.17693e-06	7.17411e-06	-36.7187	-55.6669	13	7	10.852	0	0	0	0	0.983896	1	0.463169	0.758353	FALSE	FALSE	FALSE
RTCA	3.80525e-06	2.15744e-05	-38.2226	-55.862	13	7	11.4896	0	0	0	0	0.729366	1	6.94612e-13	2.27894e-11	FALSE	TRUE	FALSE
RTF1	0.000867064	0.00322135	-29.7172	-41.1161	13	7	3.89965	0	0	0	0	0.907804	1	0.8234	0.998101	FALSE	FALSE	FALSE
RTL9	5.81938e-11	6.22688e-10	-11.466	-41.1913	13	7	2.36999	0	0	0	0	0.999747	1	4.52764e-19	2.49412e-17	FALSE	TRUE	FALSE
RTRAF	0.000199373	0.000858687	-58.4698	-71.5984	13	7	28.8488	0	0	0	0	0.450078	1	0.0969042	0.278063	FALSE	FALSE	FALSE
RWDD1	1.46597e-08	1.19583e-07	-41.8155	-65.5811	13	7	20.4469	0	0	0	0	0.0278628	1	0.334653	0.627651	FALSE	FALSE	FALSE
RWDD2B	0.000819089	0.00307382	-30.3006	-41.7673	13	7	4.97767	0	0	0	0	0.268025	1	0.0938267	0.271854	FALSE	FALSE	FALSE
RYR3	5.30255e-13	6.85796e-12	-23.1621	-57.8868	13	7	6.3356	0	0	0	0	1	1	1	1	FALSE	FALSE	FALSE
S100A1	4.66607e-118	2.31334e-115	-60.1965	-340.95	13	7	187.803	0	0	0	0	0.936966	1	0.603768	0.871286	FALSE	FALSE	FALSE
S100A2	2.42904e-29	8.33721e-28	-40.8837	-114.708	13	7	25.029	0	0	0	0	0.999827	1	0.204006	0.455365	FALSE	FALSE	FALSE
S100A6	7.02803e-12	8.04078e-11	-127.681	-159.661	13	7	3253.15	0	0	0	0	1	1	5.15309e-05	0.000611519	FALSE	TRUE	FALSE
SAFB	0.000933428	0.00344781	-41.1924	-52.5034	13	7	14.2764	0	0	0	0	0.757254	1	0.794019	0.984254	FALSE	FALSE	FALSE
SAMD9	2.8759e-19	5.72869e-18	-19.1523	-69.0104	13	7	4.10683	0	0	0	0	0.971858	1	6.60363e-14	2.49707e-12	FALSE	TRUE	FALSE
SAMHD1	1.90621e-08	1.53877e-07	-24.1536	-47.6334	13	7	2.67141	0	0	0	0	0.833549	1	3.91153e-10	1.02666e-08	FALSE	TRUE	FALSE
SAMM50	0.000939319	0.0034667	-38.4718	-49.7753	13	7	13.2796	0	0	0	0	0.572328	1	0.00181352	0.0134195	FALSE	FALSE	FALSE
SAR1A	2.75256e-06	1.59921e-05	-45.3403	-63.342	13	7	14.8869	0	0	0	0	0.432493	1	1.21103e-13	4.35776e-12	FALSE	TRUE	FALSE
SAR1B	0.00114678	0.0041399	-31.0091	-42.0742	13	7	4.17286	0	0	0	0	0.818486	1	0.565748	0.844835	FALSE	FALSE	FALSE
SARAF	5.5055e-13	7.09986e-12	-36.2047	-70.8896	13	7	14.5044	0	0	0	0	0.17808	1	1.82374e-08	3.95026e-07	FALSE	TRUE	FALSE
SARDH	8.40697e-27	2.66042e-25	-21.719	-89.5296	13	7	4.96928	0	0	0	0	0.788474	1	2.40097e-07	4.37271e-06	FALSE	TRUE	FALSE
SATB1	1.66097e-06	9.88167e-06	-25.1478	-43.7129	13	7	4.04202	0	0	0	0	0.446969	1	0.689638	0.930219	FALSE	FALSE	FALSE
SBDS	1.00207e-08	8.37305e-08	-51.5434	-75.7225	13	7	27.6219	0	0	0	0	0.989034	1	0.0900286	0.264455	FALSE	FALSE	FALSE
SCAF11	0.000353765	0.00144551	-38.2349	-50.6934	13	7	11.6787	0	0	0	0	0.888323	1	0.00220271	0.0156505	FALSE	FALSE	FALSE
SCAND1	0.000806347	0.0030311	-33.3901	-44.8755	13	7	8.39467	0	0	0	0	0.468767	1	0.00931794	0.0508272	FALSE	FALSE	FALSE
SCD	0.00235844	0.00790634	-23.9433	-34.1389	13	7	3.14806	0	0	0	0	0.787386	1	0.0321922	0.127309	FALSE	FALSE	FALSE
SCML1	2.95309e-07	1.93775e-06	-23.3071	-43.7855	13	7	2.40912	0	0	0	0	0.145486	1	7.52377e-06	0.000106575	FALSE	TRUE	FALSE
SCN2A	8.14776e-06	4.3995e-05	-24.9794	-41.7638	13	7	3.5658	0	0	0	0	1	1	0.904818	1	FALSE	FALSE	FALSE
SDC2	1.13075e-20	2.37991e-19	-64.9584	-118.181	13	7	98.0706	0	0	0	0	0.940713	1	0.757677	0.968697	FALSE	FALSE	FALSE
SEC24D	4.70725e-08	3.53004e-07	-42.3493	-64.843	13	7	14.5102	0	0	0	0	0.569855	1	6.06407e-05	0.000708322	FALSE	TRUE	FALSE
SEC61B	1.0419e-09	9.68536e-09	-53.1102	-79.7382	13	7	33.207	0	0	0	0	0.999997	1	0.106009	0.297063	FALSE	FALSE	FALSE
SEC62	0.00143205	0.00507127	-44.2174	-55.016	13	7	16.8301	0	0	0	0	1	1	0.000109173	0.0011795	FALSE	FALSE	FALSE
SEC63	1.36533e-10	1.39407e-09	-102.433	-131.246	13	7	744.059	0	0	0	0	0.702059	1	0.631431	0.893761	FALSE	FALSE	FALSE
SEM1	1.77407e-17	3.16635e-16	-16.7973	-62.3568	13	7	6.67218	0	0	0	0	0.382001	1	5.95297e-05	0.000699049	FALSE	TRUE	FALSE
SEMA3A	1.25817e-12	1.55081e-11	-40.7029	-74.5117	13	7	16.4372	0	0	0	0	0.87923	1	1.22465e-20	7.48549e-19	FALSE	TRUE	FALSE
SEMA6A	3.3832e-09	2.95997e-08	-32.3722	-57.7283	13	7	6.62083	0	0	0	0	0.511953	1	0.0687278	0.219045	FALSE	FALSE	FALSE
SEPSECS	2.29954e-28	7.6004e-27	-36.7332	-108.248	13	7	13.6496	0	0	0	0	0.676628	1	0.0172368	0.0806012	FALSE	FALSE	FALSE
SEPTIN7	3.2448e-05	0.000159628	-53.89	-69.1089	13	7	29.8948	0	0	0	0	0.782594	1	0.00171919	0.0128493	FALSE	FALSE	FALSE
SERINC3	2.51193e-14	3.63904e-13	-41.6986	-79.6456	13	7	19.45	0	0	0	0	0.901116	1	4.29359e-06	6.4723e-05	FALSE	TRUE	FALSE
SERPINA1	1.54346e-16	2.6286e-15	-32.0862	-75.3827	13	7	10.5474	0	0	0	0	0.583855	1	0.990244	1	FALSE	FALSE	FALSE
SERPINB6	0.0025252	0.0083906	-30.6378	-40.7503	13	7	7.45199	0	0	0	0	0.636157	1	0.000771724	0.00649704	FALSE	FALSE	FALSE
SERPINE1	1.12909e-08	9.34695e-08	-27.0682	-51.1176	13	7	5.03619	0	0	0	0	0.984129	1	0.130217	0.339385	FALSE	FALSE	FALSE
SERPINI1	6.12858e-08	4.49026e-07	-20.3055	-42.5107	13	7	3.19972	0	0	0	0	1	1	1	1	FALSE	FALSE	FALSE
SF3B1	7.10977e-32	2.93739e-30	-60.0195	-139.832	13	7	84.4691	0	0	0	0	0.393085	1	5.35763e-08	1.06422e-06	FALSE	TRUE	FALSE
SGCB	7.81625e-24	2.13018e-22	-38.0062	-98.7657	13	7	13.6243	0	0	0	0	0.479005	1	0.203482	0.455106	FALSE	FALSE	FALSE
SGK1	0.00122235	0.00440558	-17.1349	-28.1236	13	7	2.0682	0	0	0	0	0.999949	1	0.00112726	0.00899788	FALSE	FALSE	FALSE
SH3BGRL	1.69448e-05	8.76101e-05	-52.7921	-68.7493	13	7	45.2348	0	0	0	0	1	1	0.000911548	0.00754606	FALSE	FALSE	FALSE
SH3BGRL3	4.57363e-14	6.47859e-13	-46.168	-83.4831	13	7	24.2374	0	0	0	0	0.0338565	1	0.0583363	0.194542	FALSE	FALSE	FALSE
SIPA1L3	7.81379e-22	1.80648e-20	-26.9255	-82.9196	13	7	7.0133	0	0	0	0	0.874412	1	0.999616	1	FALSE	FALSE	FALSE
SKP1	9.98608e-05	0.000462879	-67.0154	-80.9452	13	7	73.3427	0	0	0	0	0.766074	1	7.03161e-08	1.35823e-06	FALSE	TRUE	FALSE
SLC18A3	5.57676e-07	3.52957e-06	-17.1728	-36.9491	13	7	3.10783	0	0	0	0	1	1	1	1	FALSE	FALSE	FALSE
SLC18B1	2.15662e-06	1.27455e-05	-22.4826	-40.7566	13	7	3.14557	0	0	0	0	0.362912	1	0.144882	0.364001	FALSE	FALSE	FALSE
SLC22A18	2.68088e-10	2.63482e-09	-26.39	-54.4784	13	7	5.85324	0	0	0	0	0.687786	1	0.000922983	0.00762657	FALSE	FALSE	FALSE
SLC25A17	0.00102886	0.00374758	-44.8881	-56.083	13	7	14.699	0	0	0	0	0.106992	1	3.40025e-06	5.2317e-05	FALSE	TRUE	FALSE
SLC25A3	2.06183e-26	6.34476e-25	-69.773	-136.659	13	7	143.036	0	0	0	0	0.897731	1	2.7276e-05	0.000344774	FALSE	TRUE	FALSE
SLC25A30	0.00305657	0.00996233	-28.4772	-38.3567	13	7	4.04906	0	0	0	0	0.946974	1	0.471383	0.767071	FALSE	FALSE	FALSE
SLC25A39	3.41197e-06	1.94683e-05	-46.8163	-64.5778	13	7	20.2473	0	0	0	0	0.153351	1	0.323707	0.612804	FALSE	FALSE	FALSE
SLC25A4	1.94738e-05	9.97612e-05	-42.5988	-58.3983	13	7	13.5588	0	0	0	0	0.893854	1	0.300877	0.590037	FALSE	FALSE	FALSE
SLC25A5	0.00248848	0.00829247	-49.102	-59.2323	13	7	36.0843	0	0	0	0	0.540772	1	6.85695e-05	0.000792635	FALSE	TRUE	FALSE
SLC25A6	9.99826e-05	0.000462879	-74.2	-88.1284	13	7	91.2808	0	0	0	0	0.465873	1	0.0309891	0.124012	FALSE	FALSE	FALSE
SLC35B1	0.000551733	0.00215383	-46.1364	-58.0716	13	7	21.2403	0	0	0	0	0.67913	1	0.992347	1	FALSE	FALSE	FALSE
SLC38A2	1.52784e-08	1.24402e-07	-30.4514	-54.172	13	7	5.25272	0	0	0	0	0.0377497	1	0.245493	0.514508	FALSE	FALSE	FALSE
SLC3A2	1.92763e-08	1.55255e-07	-47.6483	-71.116	13	7	20.0586	0	0	0	0	0.167318	1	0.0529097	0.181184	FALSE	FALSE	FALSE
SLC4A2	3.5666e-05	0.000174306	-27.7831	-42.8941	13	7	5.2175	0	0	0	0	0.344261	1	0.270378	0.549645	FALSE	FALSE	FALSE
SLC4A4	0.000966592	0.00354728	-26.0477	-37.3171	13	7	3.54432	0	0	0	0	0.986796	1	0.0611786	0.201907	FALSE	FALSE	FALSE
SLC4A7	0.00029376	0.00121931	-28.2306	-40.9068	13	7	3.60006	0	0	0	0	0.85756	1	0.483453	0.778198	FALSE	FALSE	FALSE
SLC4A8	4.21044e-87	9.88789e-85	-31.0462	-239.934	13	7	30.9803	0	0	0	0	0.684316	1	0.000101969	0.00111516	FALSE	FALSE	FALSE
SLC6A8	9.33265e-06	5.0111e-05	-22.6551	-39.2865	13	7	3.32185	0	0	0	0	0.999985	1	0.371939	0.670271	FALSE	FALSE	FALSE
SLC7A11	0.000613088	0.00236235	-18.5075	-30.3179	13	7	1.5977	0	0	0	0	0.950339	1	0.956906	1	FALSE	FALSE	FALSE
SLIRP	1.64813e-08	1.33952e-07	-47.7196	-71.3577	13	7	20.5562	0	0	0	0	1	1	0.349265	0.645308	FALSE	FALSE	FALSE
SLPI	1.94659e-09	1.75468e-08	-23.7346	-49.6883	13	7	3.54875	0	0	0	0	0.657166	1	0.833069	1	FALSE	FALSE	FALSE
SMARCE1	3.29757e-05	0.000162046	-117.083	-132.284	13	7	1486.61	0	0	0	0	0.25319	1	0.388898	0.688051	FALSE	FALSE	FALSE
SMC3	4.65275e-30	1.67424e-28	-46.309	-121.831	13	7	33.5278	0	0	0	0	0.458112	1	0.871461	1	FALSE	FALSE	FALSE
SMC4	4.86239e-21	1.03808e-19	-52.6522	-106.75	13	7	47.0205	0	0	0	0	0.999998	1	0.0477744	0.169132	FALSE	FALSE	FALSE
SMC6	1.13975e-07	7.94616e-07	-89.1151	-110.64	13	7	254.916	0	0	0	0	0.967829	1	0.0102879	0.0546909	FALSE	FALSE	FALSE
SMDT1	7.11363e-06	3.88983e-05	-66.533	-83.4702	13	7	50.0998	0	0	0	0	0.9999	1	0.0487928	0.171428	FALSE	FALSE	FALSE
SMURF1	0.000753389	0.00284754	-16.7382	-28.3043	13	7	2.60703	0	0	0	0	0.503475	1	1.62839e-09	4.0143e-08	FALSE	TRUE	FALSE
SMURF2	0.00140952	0.00499888	-24.639	-35.4566	13	7	2.47768	0	0	0	0	0.999411	1	0.242608	0.510078	FALSE	FALSE	FALSE
SNF8	7.90517e-08	5.65271e-07	-38.2092	-60.1357	13	7	10.881	0	0	0	0	0.58446	1	0.711249	0.943848	FALSE	FALSE	FALSE
SNRNP200	1.22143e-05	6.4804e-05	-43.6399	-59.9676	13	7	16.8389	0	0	0	0	0.457878	1	0.122891	0.327759	FALSE	FALSE	FALSE
SNRPA1	5.09083e-10	4.87453e-09	-44.3783	-71.7775	13	7	22.9192	0	0	0	0	0.563575	1	0.429342	0.727723	FALSE	FALSE	FALSE
SNRPB2	0.00186913	0.006429	-56.6926	-67.1701	13	7	38.9038	0	0	0	0	0.68951	1	0.710716	0.943721	FALSE	FALSE	FALSE
SNRPD1	1.95561e-14	2.85161e-13	-45.8031	-84.014	13	7	32.4441	0	0	0	0	0.555525	1	0.00279476	0.0190385	FALSE	FALSE	FALSE
SNRPD3	8.04856e-07	4.98787e-06	-39.8817	-59.2517	13	7	11.3042	0	0	0	0	1	1	0.00490206	0.0306344	FALSE	FALSE	FALSE
SNX2	3.84676e-12	4.54081e-11	-51.6322	-84.2541	13	7	35.4994	0	0	0	0	0.178057	1	0.95361	1	FALSE	FALSE	FALSE
SNX8	8.2819e-09	6.99884e-08	-31.3095	-55.6955	13	7	7.79074	0	0	0	0	0.470354	1	0.232666	0.497201	FALSE	FALSE	FALSE
SP100	1.18266e-30	4.58873e-29	-38.8789	-115.807	13	7	14.5823	0	0	0	0	1	1	1.8925e-21	1.22382e-19	FALSE	TRUE	FALSE
SP140L	1.00493e-10	1.04522e-09	-24.9742	-54.1149	13	7	5.05136	0	0	0	0	0.940829	1	0.856419	1	FALSE	FALSE	FALSE
SPAG9	5.95471e-05	0.00028296	-28.7859	-43.3105	13	7	3.48935	0	0	0	0	0.00476063	1	1.05614e-06	1.77389e-05	FALSE	TRUE	FALSE
SPARC	3.22656e-15	4.93044e-14	-39.9683	-80.0755	13	7	19.5233	0	0	0	0	0.973328	1	1.88631e-08	4.06605e-07	FALSE	TRUE	FALSE
SPART	1.23317e-21	2.779e-20	-41.2059	-96.727	13	7	12.8704	0	0	0	0	0.33074	1	0.0361907	0.138798	FALSE	FALSE	FALSE
SPATC1L	2.8519e-14	4.11818e-13	-22.7754	-60.5886	13	7	5.22969	0	0	0	0	1	1	0.00345951	0.0228348	FALSE	FALSE	FALSE
SPATS2L	2.43432e-06	1.42732e-05	-41.2141	-59.3529	13	7	12.6851	0	0	0	0	0.981393	1	0.997896	1	FALSE	FALSE	FALSE
SPCS2	4.48701e-12	5.25486e-11	-41.6649	-74.1231	13	7	14.9709	0	0	0	0	0.479515	1	0.310778	0.599261	FALSE	FALSE	FALSE
SPINK5	6.51756e-17	1.13599e-15	-51.1476	-95.3465	13	7	48.0396	0	0	0	0	0.135278	1	0.246894	0.516475	FALSE	FALSE	FALSE
SPINT2	2.0541e-15	3.18243e-14	-28.0574	-68.6391	13	7	7.38635	0	0	0	0	0.44119	1	0.682218	0.925807	FALSE	FALSE	FALSE
SPNS1	5.51929e-07	3.49816e-06	-32.3059	-52.0936	13	7	7.30792	0	0	0	0	0.588552	1	0.206386	0.459757	FALSE	FALSE	FALSE
SPP1	2.18713e-07	1.46752e-06	-26.03	-46.8391	13	7	4.44744	0	0	0	0	0.444484	1	0.877672	1	FALSE	FALSE	FALSE
SPPL2A	8.20414e-12	9.33849e-11	-38.8269	-70.6429	13	7	16.3189	0	0	0	0	0.998506	1	0.79664	0.984457	FALSE	FALSE	FALSE
SPRY2	4.07948e-15	6.19138e-14	-21.9962	-61.8568	13	7	3.20814	0	0	0	0	0.620464	1	6.27626e-19	3.33389e-17	FALSE	TRUE	FALSE
SQSTM1	5.98329e-45	4.1073e-43	-79.9657	-190.529	13	7	381.198	0	0	0	0	0.156312	1	0.0149624	0.072805	FALSE	FALSE	FALSE
SRFBP1	0.00135669	0.00484283	-56.4503	-67.3139	13	7	28.1268	0	0	0	0	0.325584	1	0.000185864	0.0018763	FALSE	FALSE	FALSE
SRGN	4.28138e-08	3.23241e-07	-17.854	-40.4513	13	7	3.03297	0	0	0	0	0.767118	1	0.135398	0.348054	FALSE	FALSE	FALSE
SRI	1.39508e-05	7.28904e-05	-46.08	-62.2574	13	7	22.6813	0	0	0	0	0.921682	1	3.72274e-11	1.0648e-09	FALSE	TRUE	FALSE
SRP68	0.000479589	0.00190047	-37.3303	-49.4309	13	7	9.38988	0	0	0	0	0.650256	1	0.865563	1	FALSE	FALSE	FALSE
SRPK2	5.73768e-26	1.72983e-24	-41.8372	-107.669	13	7	20.893	0	0	0	0	0.0843463	1	3.11461e-21	1.98534e-19	FALSE	TRUE	FALSE
SRR	9.84395e-05	0.000458016	-36.0703	-50.0166	13	7	8.77395	0	0	0	0	0.336322	1	0.725956	0.952711	FALSE	FALSE	FALSE
SRRM1	9.97728e-05	0.000462879	-44.8356	-58.7664	13	7	15.5584	0	0	0	0	0.488791	1	0.00997253	0.0537409	FALSE	FALSE	FALSE
SRSF1	0.00111538	0.0040331	-50.4319	-61.5303	13	7	23.5925	0	0	0	0	0.282324	1	0.199648	0.449459	FALSE	FALSE	FALSE
SRSF12	1.43233e-07	9.86271e-07	-18.7984	-40.0729	13	7	3.36259	0	0	0	0	1	1	1	1	FALSE	FALSE	FALSE
SRSF2	0.00197125	0.00672457	-35.4395	-45.8526	13	7	6.32034	0	0	0	0	0.88012	1	0.249294	0.519606	FALSE	FALSE	FALSE
SRSF3	8.53703e-13	1.07605e-11	-108.238	-142.458	13	7	1692.61	0	0	0	0	0.000518267	0.318698	0.00741742	0.0422688	FALSE	FALSE	FALSE
SRSF4	0.000227623	0.000966369	-32.1023	-45.0765	13	7	5.29737	0	0	0	0	0.998062	1	0.108835	0.302756	FALSE	FALSE	FALSE
SRSF5	1.08279e-05	5.80697e-05	-44.2051	-60.6689	13	7	17.5722	0	0	0	0	0.197278	1	0.418402	0.716367	FALSE	FALSE	FALSE
SSB	0.00241085	0.00805783	-48.5957	-58.7646	13	7	25.6291	0	0	0	0	0.290496	1	0.0103932	0.0548813	FALSE	FALSE	FALSE
SSBP1	5.6733e-05	0.000270452	-48.4618	-63.0419	13	7	25.0477	0	0	0	0	0.95492	1	0.406207	0.707377	FALSE	FALSE	FALSE
SSR2	5.076e-07	3.23097e-06	-46.2377	-66.118	13	7	28.6457	0	0	0	0	0.999891	1	9.50103e-06	0.000132686	FALSE	TRUE	FALSE
SSR4	0.000865451	0.00322072	-49.1194	-60.5206	13	7	23.782	0	0	0	0	0.0863078	1	0.003089	0.020756	FALSE	FALSE	FALSE
ST3GAL1	0.000859322	0.00320058	-13.8875	-25.2971	13	7	1.69877	0	0	0	0	0.999921	1	0.0636586	0.207635	FALSE	FALSE	FALSE
STAG3	5.51813e-05	0.000263618	-18.5123	-33.1242	13	7	2.0867	0	0	0	0	0.660741	1	0.216454	0.4741	FALSE	FALSE	FALSE
STAP2	1.46996e-30	5.51174e-29	-26.9882	-103.693	13	7	8.45584	0	0	0	0	0.385133	1	0.503315	0.793566	FALSE	FALSE	FALSE
STARD13	8.06762e-05	0.000376545	-32.0835	-46.2591	13	7	5.83059	0	0	0	0	0.961756	1	0.00689906	0.0400307	FALSE	FALSE	FALSE
STARD3NL	0.00154115	0.00542748	-33.8585	-44.5688	13	7	8.1476	0	0	0	0	0.403999	1	0.010321	0.054694	FALSE	FALSE	FALSE
STAT1	0.000169519	0.000743019	-44.2892	-57.6064	13	7	14.7301	0	0	0	0	0.176306	1	1.69004e-05	0.000226455	FALSE	TRUE	FALSE
STAT4	0.000168037	0.000739429	-16.9043	-30.2316	13	7	1.98274	0	0	0	0	1	1	1	1	FALSE	FALSE	FALSE
STK17B	0.000113294	0.000515833	-28.6702	-42.4542	13	7	4.32862	0	0	0	0	0.150119	1	0.755123	0.967929	FALSE	FALSE	FALSE
STK38L	5.681e-06	3.14499e-05	-29.9555	-47.1455	13	7	5.73405	0	0	0	0	0.624205	1	0.975071	1	FALSE	FALSE	FALSE
STRAP	3.3845e-07	2.20462e-06	-35.0034	-55.3314	13	7	8.09538	0	0	0	0	0.568675	1	0.0120191	0.0619277	FALSE	FALSE	FALSE
STRBP	3.16176e-06	1.82036e-05	-57.2663	-75.113	13	7	32.2397	0	0	0	0	0.990402	1	0.747622	0.96413	FALSE	FALSE	FALSE
SUCLA2	0.00157434	0.00552692	-36.3734	-47.058	13	7	5.87108	0	0	0	0	0.740299	1	0.953173	1	FALSE	FALSE	FALSE
SULF2	0.000135757	0.000606353	-27.2552	-40.83	13	7	3.90173	0	0	0	0	0.928316	1	0.568274	0.846623	FALSE	FALSE	FALSE
SUMF2	1.86698e-05	9.59732e-05	-27.0138	-42.8611	13	7	4.01871	0	0	0	0	0.716195	1	0.138081	0.353684	FALSE	FALSE	FALSE
SUMO3	1.97764e-08	1.58995e-07	-41.0725	-64.5122	13	7	10.5065	0	0	0	0	1	1	1.89114e-07	3.53065e-06	FALSE	TRUE	FALSE
SUN1	2.11302e-09	1.88566e-08	-27.8965	-53.7615	13	7	3.38723	0	0	0	0	0.447641	1	0.000131381	0.00138587	FALSE	FALSE	FALSE
SUPT16H	1.28107e-05	6.74866e-05	-43.6871	-59.9609	13	7	13.4818	0	0	0	0	0.99914	1	0.933528	1	FALSE	FALSE	FALSE
SUPT6H	0.00176695	0.00612121	-33.8735	-44.4189	13	7	6.2208	0	0	0	0	0.0885525	1	0.684059	0.92746	FALSE	FALSE	FALSE
SUPV3L1	0.000135266	0.000604768	-36.8841	-50.4631	13	7	8.68407	0	0	0	0	0.99991	1	0.0523557	0.179701	FALSE	FALSE	FALSE
SURF1	1.53817e-13	2.07979e-12	-44.1538	-80.1881	13	7	20.492	0	0	0	0	0.381093	1	0.395884	0.69572	FALSE	FALSE	FALSE
SUSD4	0.000613085	0.00236235	-17.8804	-29.6909	13	7	1.68261	0	0	0	0	1	1	1	1	FALSE	FALSE	FALSE
SVIP	0.0010324	0.00375741	-28.9672	-40.158	13	7	3.92179	0	0	0	0	0.873106	1	0.539262	0.824601	FALSE	FALSE	FALSE
SYF2	3.59105e-09	3.11737e-08	-64.4086	-89.7002	13	7	89.5071	0	0	0	0	0.108519	1	0.0504987	0.175451	FALSE	FALSE	FALSE
SYNE2	1.56779e-26	4.85797e-25	-33.2262	-100.395	13	7	15.304	0	0	0	0	0.851593	1	0.832886	1	FALSE	FALSE	FALSE
SYNGR1	0.000589633	0.00227984	-31.4543	-43.3109	13	7	5.5295	0	0	0	0	0.942434	1	0.516468	0.804343	FALSE	FALSE	FALSE
TACO1	0.000206718	0.000886049	-23.5309	-36.6174	13	7	3.61921	0	0	0	0	0.91155	1	0.705274	0.939663	FALSE	FALSE	FALSE
TAF10	1.10579e-07	7.73358e-07	-54.5427	-76.1012	13	7	33.4144	0	0	0	0	0.999754	1	0.103604	0.292096	FALSE	FALSE	FALSE
TAF1D	3.06076e-09	2.68313e-08	-47.6151	-73.0796	13	7	21.4595	0	0	0	0	0.301155	1	0.0556584	0.188142	FALSE	FALSE	FALSE
TAF3	3.997e-05	0.000194066	-54.7854	-69.7663	13	7	33.5483	0	0	0	0	0.876516	1	0.116219	0.316009	FALSE	FALSE	FALSE
TAF7	3.79328e-09	3.28016e-08	-32.9114	-58.1437	13	7	10.6529	0	0	0	0	0.0238199	1	0.00152966	0.0116872	FALSE	FALSE	FALSE
TAFA4	8.14608e-05	0.000379414	-18.5085	-32.673	13	7	2.37846	0	0	0	0	1	1	1	1	FALSE	FALSE	FALSE
TALDO1	0.000252421	0.00106556	-60.3703	-73.2238	13	7	51.6272	0	0	0	0	0.995082	1	1.40009e-09	3.49007e-08	FALSE	TRUE	FALSE
TAP1	0.00221153	0.00747565	-30.1587	-40.4324	13	7	3.44111	0	0	0	0	0.731978	1	0.027336	0.113463	FALSE	FALSE	FALSE
TATDN1	0.000143854	0.000638682	-37.8315	-51.3391	13	7	9.10474	0	0	0	0	0.336253	1	0.748634	0.964194	FALSE	FALSE	FALSE
TAX1BP1	5.28755e-14	7.4426e-13	-52.8424	-90.0044	13	7	31.2219	0	0	0	0	0.924414	1	0.00228141	0.0160562	FALSE	FALSE	FALSE
TBC1D1	2.1987e-07	1.47307e-06	-26.6597	-47.463	13	7	4.72209	0	0	0	0	0.40864	1	0.496844	0.787817	FALSE	FALSE	FALSE
TBCD	0.00171583	0.00596265	-31.5172	-42.098	13	7	5.23636	0	0	0	0	0.920589	1	0.193889	0.441619	FALSE	FALSE	FALSE
TBXA2R	0.000307351	0.00127217	-17.707	-30.3303	13	7	1.87666	0	0	0	0	0.906761	1	0.878072	1	FALSE	FALSE	FALSE
TCEAL8	0.00192754	0.00660069	-28.9947	-39.4349	13	7	5.00123	0	0	0	0	0.999945	1	0.184072	0.425338	FALSE	FALSE	FALSE
TCEANC2	1.33767e-43	8.77748e-42	-25.6905	-133.089	13	7	10.773	0	0	0	0	0.968712	1	0.681776	0.925656	FALSE	FALSE	FALSE
TCN2	8.99795e-14	1.23535e-12	-36.3408	-72.9417	13	7	12.2879	0	0	0	0	0.199532	1	0.693749	0.933226	FALSE	FALSE	FALSE
TCP1	0.00124614	0.00448409	-47.9675	-58.9331	13	7	25.1457	0	0	0	0	0.0250205	1	0.227543	0.490246	FALSE	FALSE	FALSE
TENT5A	3.63651e-22	8.81855e-21	-21.296	-78.0825	13	7	6.03742	0	0	0	0	1	1	1.18353e-11	3.4973e-10	FALSE	TRUE	FALSE
TERF2IP	6.2523e-05	0.000295841	-27.6554	-42.1241	13	7	5.67559	0	0	0	0	0.198511	1	0.0334248	0.130711	FALSE	FALSE	FALSE
TEX10	1.3061e-09	1.20409e-08	-31.6152	-57.9995	13	7	9.45357	0	0	0	0	0.999902	1	1.60306e-05	0.000215448	FALSE	TRUE	FALSE
TEX9	3.20928e-15	4.9209e-14	-30.2806	-70.3935	13	7	10.6631	0	0	0	0	0.44303	1	0.358338	0.655402	FALSE	FALSE	FALSE
TFPI2	1.1651e-26	3.63545e-25	-32.2768	-99.7512	13	7	8.28257	0	0	0	0	0.992365	1	4.22194e-14	1.62399e-12	FALSE	TRUE	FALSE
TGFB2	2.79363e-10	2.7396e-09	-54.8982	-82.9424	13	7	41.4455	0	0	0	0	0.0473632	1	7.90764e-18	3.83521e-16	FALSE	TRUE	FALSE
TGFBI	7.06055e-71	9.54672e-69	-43.6939	-214.826	13	7	48.7132	0	0	0	0	0.00970966	1	5.89623e-15	2.48198e-13	FALSE	TRUE	FALSE
TGFBR1	4.98857e-05	0.000240119	-25.0013	-39.7288	13	7	3.4964	0	0	0	0	1	1	0.395288	0.694947	FALSE	FALSE	FALSE
THY1	3.54976e-10	3.4358e-09	-16.7789	-44.5658	13	7	3.91653	0	0	0	0	0.576051	1	0.00737734	0.0421523	FALSE	FALSE	FALSE
TIMM10	0.000435898	0.00174751	-27.9817	-40.1948	13	7	4.45717	0	0	0	0	0.652132	1	0.1274	0.334598	FALSE	FALSE	FALSE
TIMM8B	3.53193e-06	2.01271e-05	-32.8485	-50.5713	13	7	8.1942	0	0	0	0	0.608101	1	7.37793e-05	0.000844111	FALSE	TRUE	FALSE
TIMP1	2.75446e-05	0.000137631	-49.0351	-64.4406	13	7	30.3856	0	0	0	0	0.999997	1	0.000373497	0.00342206	FALSE	FALSE	FALSE
TIPARP	1.54155e-23	4.13227e-22	-47.8764	-107.934	13	7	39.2093	0	0	0	0	0.515541	1	2.71889e-35	3.4662e-33	FALSE	TRUE	FALSE
TIPIN	0.00111366	0.00403295	-25.7344	-36.8346	13	7	3.64595	0	0	0	0	1	1	0.549486	0.830255	FALSE	FALSE	FALSE
TLL1	0.00126716	0.00455237	-22.049	-32.9945	13	7	2.30167	0	0	0	0	1	1	1	1	FALSE	FALSE	FALSE
TLN1	1.40681e-09	1.2916e-08	-54.4567	-80.7609	13	7	36.5132	0	0	0	0	0.854133	1	0.001823	0.0134661	FALSE	FALSE	FALSE
TM2D3	0.000568284	0.00220878	-39.4315	-51.3317	13	7	9.05494	0	0	0	0	0.588453	1	0.817952	0.996642	FALSE	FALSE	FALSE
TM4SF1	2.1812e-15	3.35605e-14	-37.7412	-78.2598	13	7	20.9487	0	0	0	0	0.999963	1	4.3536e-05	0.000522198	FALSE	TRUE	FALSE
TM7SF3	0.000686663	0.00261476	-24.146	-35.8222	13	7	3.02882	0	0	0	0	0.99998	1	0.409141	0.710175	FALSE	FALSE	FALSE
TMED4	1.10968e-05	5.93695e-05	-35.8062	-52.2422	13	7	9.05573	0	0	0	0	0.337796	1	0.352558	0.648975	FALSE	FALSE	FALSE
TMED9	0.000944795	0.00348115	-45.7968	-57.0934	13	7	20.2312	0	0	0	0	0.755987	1	7.50058e-07	1.27739e-05	FALSE	TRUE	FALSE
TMEM104	7.96561e-07	4.94333e-06	-21.2753	-40.6568	13	7	2.72118	0	0	0	0	0.999918	1	0.622576	0.887558	FALSE	FALSE	FALSE
TMEM135	5.79463e-22	1.3537e-20	-34.9128	-91.2166	13	7	8.63849	0	0	0	0	0.999797	1	0.0015065	0.01153	FALSE	FALSE	FALSE
TMEM145	2.7778e-16	4.62482e-15	-31.0423	-73.7232	13	7	6.06704	0	0	0	0	0.848902	1	0.268013	0.547476	FALSE	FALSE	FALSE
TMEM165	6.35561e-48	4.72646e-46	-34.4197	-151.952	13	7	22.3278	0	0	0	0	0.505544	1	1.09894e-60	2.45174e-58	FALSE	TRUE	FALSE
TMEM189-UBE2V1	0.000441224	0.00176569	-36.1097	-48.3084	13	7	8.09367	0	0	0	0	0.707417	1	0.0300547	0.120814	FALSE	FALSE	FALSE
TMEM208	0.000534737	0.0020985	-34.6272	-46.5993	13	7	7.79197	0	0	0	0	0.745554	1	0.125241	0.331647	FALSE	FALSE	FALSE
TMEM230	9.8598e-10	9.20386e-09	-33.8339	-60.5214	13	7	8.64057	0	0	0	0	0.769134	1	0.00544801	0.0333457	FALSE	FALSE	FALSE
TMEM40	0.000580083	0.00224877	-16.9264	-28.8023	13	7	1.68899	0	0	0	0	1	1	1	1	FALSE	FALSE	FALSE
TMEM50A	0.000281892	0.00117442	-67.6383	-80.3628	13	7	67.3824	0	0	0	0	0.121975	1	0.25366	0.525856	FALSE	FALSE	FALSE
TMEM50B	0.000268404	0.00112664	-33.2095	-45.9913	13	7	8.39083	0	0	0	0	0.999975	1	0.0127491	0.0647909	FALSE	FALSE	FALSE
TMEM60	2.48503e-10	2.46953e-09	-24.791	-52.9608	13	7	4.74529	0	0	0	0	1	1	0.0861651	0.255971	FALSE	FALSE	FALSE
TMEM87A	1.33423e-06	8.04506e-06	-32.4062	-51.215	13	7	7.6391	0	0	0	0	0.438968	1	0.000872062	0.0072326	FALSE	FALSE	FALSE
TMEM98	6.07477e-24	1.68358e-22	-30.383	-91.403	13	7	12.3418	0	0	0	0	0.99999	1	0.353247	0.649618	FALSE	FALSE	FALSE
TMEM9B	0.0016817	0.00585773	-31.9029	-42.508	13	7	6.55433	0	0	0	0	0.569848	1	0.0081738	0.0459339	FALSE	FALSE	FALSE
TNFAIP3	1.13219e-19	2.2859e-18	-38.7416	-89.5697	13	7	36.8342	0	0	0	0	0.92327	1	2.55256e-10	6.82007e-09	FALSE	TRUE	FALSE
TNFAIP6	4.70479e-19	9.28883e-18	-32.2061	-81.5517	13	7	10.1116	0	0	0	0	0.490284	1	0.946306	1	FALSE	FALSE	FALSE
TNFRSF10B	1.82861e-07	1.24001e-06	-31.8684	-52.8745	13	7	15.6031	0	0	0	0	0.855118	1	5.36643e-08	1.06422e-06	FALSE	TRUE	FALSE
TNFRSF10D	0.000112298	0.000511821	-21.5878	-35.3821	13	7	7.55202	0	0	0	0	1	1	1	1	FALSE	FALSE	FALSE
TNFRSF11B	1.50026e-78	2.67767e-76	-37.8229	-226.82	13	7	38.5394	0	0	0	0	0.651066	1	4.82014e-10	1.25775e-08	FALSE	TRUE	FALSE
TNFRSF1A	0.000157647	0.000695768	-32.6166	-46.018	13	7	7.93582	0	0	0	0	0.627922	1	0.00428793	0.0272931	FALSE	FALSE	FALSE
TNIP1	3.37525e-05	0.000165317	-39.6438	-54.8177	13	7	12.2906	0	0	0	0	0.18014	1	0.00742938	0.042283	FALSE	FALSE	FALSE
TOB1	0.000472895	0.00187895	-42.2261	-54.3433	13	7	11.6418	0	0	0	0	0.918793	1	0.133428	0.345935	FALSE	FALSE	FALSE
TOGARAM1	3.45132e-07	2.23509e-06	-42.6858	-62.9922	13	7	14.2386	0	0	0	0	0.588749	1	0.0165513	0.0784825	FALSE	FALSE	FALSE
TOMM6	0.00183882	0.00634555	-34.1186	-44.6158	13	7	11.0251	0	0	0	0	0.999857	1	0.000321218	0.00300424	FALSE	FALSE	FALSE
TOP1	1.0305e-11	1.1553e-10	-42.9863	-74.5595	13	7	14.3474	0	0	0	0	0.666974	1	0.0203703	0.0911658	FALSE	FALSE	FALSE
TOP2A	0.000408705	0.00165036	-67.6703	-79.9592	13	7	109.688	0	0	0	0	0.954943	1	2.75995e-13	9.40068e-12	FALSE	TRUE	FALSE
TP53BP2	1.88134e-15	2.93515e-14	-34.1788	-74.8528	13	7	9.8216	0	0	0	0	0.982828	1	0.993252	1	FALSE	FALSE	FALSE
TP53I11	0.002719	0.00897352	-23.527	-33.5494	13	7	3.16525	0	0	0	0	0.577843	1	0.0484482	0.170486	FALSE	FALSE	FALSE
TPGS2	0.00138492	0.00493158	-20.9761	-31.815	13	7	3.13636	0	0	0	0	0.44553	1	0.0035381	0.0231821	FALSE	FALSE	FALSE
TPI1	1.61996e-06	9.66347e-06	-65.5567	-84.1495	13	7	91.5819	0	0	0	0	1	1	1.72037e-09	4.1947e-08	FALSE	TRUE	FALSE
TPM2	9.85165e-37	5.1114e-35	-34.7877	-126.052	13	7	16.3997	0	0	0	0	0.00903286	1	0.0215603	0.0951554	FALSE	FALSE	FALSE
TPM3	0.000191758	0.000829094	-51.5246	-64.6985	13	7	25.8517	0	0	0	0	0.833845	1	4.10222e-06	6.22588e-05	FALSE	TRUE	FALSE
TPM4	2.24642e-13	2.98325e-12	-54.2541	-89.8879	13	7	32.2142	0	0	0	0	0.407923	1	0.0175942	0.0818614	FALSE	FALSE	FALSE
TPST1	0.000921575	0.00341251	-22.5483	-33.8746	13	7	3.01604	0	0	0	0	0.296693	1	0.0670779	0.214707	FALSE	FALSE	FALSE
TPT1	4.18482e-13	5.45985e-12	-95.3059	-130.281	13	7	495.519	0	0	0	0	0.999992	1	7.59434e-06	0.000107234	FALSE	TRUE	FALSE
TRAM1	4.9918e-06	2.80169e-05	-40.8936	-58.2288	13	7	14.4626	0	0	0	0	0.00868405	1	0.0199843	0.0900064	FALSE	FALSE	FALSE
TRAPPC1	7.81603e-13	9.9077e-12	-47.0582	-81.3718	13	7	24.1905	0	0	0	0	0.323825	1	0.00495745	0.0307652	FALSE	FALSE	FALSE
TRAPPC5	0.000370593	0.00151013	-34.0175	-46.4214	13	7	10.0158	0	0	0	0	1	1	0.00171267	0.0128221	FALSE	FALSE	FALSE
TRARG1	4.84189e-24	1.35877e-22	-23.999	-85.2533	13	7	9.01559	0	0	0	0	1	1	1	1	FALSE	FALSE	FALSE
TRIB2	1.06869e-07	7.49765e-07	-16.5698	-38.1658	13	7	1.96247	0	0	0	0	0.238649	1	0.863424	1	FALSE	FALSE	FALSE
TRIP11	1.15767e-10	1.19573e-09	-44.3051	-73.2942	13	7	20.4352	0	0	0	0	0.129575	1	0.0035162	0.0231065	FALSE	FALSE	FALSE
TRIP4	3.18939e-06	1.8339e-05	-38.4947	-56.3317	13	7	9.17898	0	0	0	0	0.760584	1	0.0903752	0.265124	FALSE	FALSE	FALSE
TRPT1	0.00083335	0.00311685	-33.012	-44.4582	13	7	4.38718	0	0	0	0	0.366588	1	0.947754	1	FALSE	FALSE	FALSE
TSEN2	9.55268e-49	7.61144e-47	-37.2368	-156.696	13	7	20.7201	0	0	0	0	0.454141	1	0.749355	0.964692	FALSE	FALSE	FALSE
TSKU	0.000274856	0.00114832	-18.0082	-30.7622	13	7	2.89013	0	0	0	0	0.575843	1	0.0365833	0.139876	FALSE	FALSE	FALSE
TSPAN2	1.13267e-07	7.90921e-07	-28.3426	-49.8749	13	7	4.76664	0	0	0	0	0.984391	1	0.696043	0.934358	FALSE	FALSE	FALSE
TSPAN4	0.00293165	0.00961396	-35.4133	-45.3438	13	7	10.2723	0	0	0	0	0.889161	1	0.0144629	0.0709161	FALSE	FALSE	FALSE
TSPAN6	0.000469474	0.0018677	-28.549	-40.6747	13	7	4.57881	0	0	0	0	0.5846	1	0.336251	0.628815	FALSE	FALSE	FALSE
TSPO	0.00225216	0.00760721	-46.1368	-56.3884	13	7	15.0002	0	0	0	0	0.948818	1	0.0603649	0.20011	FALSE	FALSE	FALSE
TSSC4	0.000446948	0.00178379	-19.5258	-31.7094	13	7	1.9832	0	0	0	0	0.579355	1	0.22039	0.479796	FALSE	FALSE	FALSE
TSTD1	0.000104154	0.000479602	-20.5555	-34.4367	13	7	2.89788	0	0	0	0	0.575902	1	0.270612	0.54985	FALSE	FALSE	FALSE
TTC1	0.000223537	0.000950832	-30.3076	-43.3029	13	7	5.31316	0	0	0	0	0.999793	1	0.414657	0.714363	FALSE	FALSE	FALSE
TTC8	9.17612e-07	5.66305e-06	-33.1309	-52.3555	13	7	6.21869	0	0	0	0	0.799269	1	0.415239	0.714814	FALSE	FALSE	FALSE
TTF1	3.67903e-07	2.37223e-06	-41.2012	-61.4371	13	7	26.9256	0	0	0	0	0.254375	1	0.71421	0.944028	FALSE	FALSE	FALSE
TUBA1A	0.000385092	0.00156492	-58.0357	-70.3945	13	7	47.7895	0	0	0	0	0.857651	1	2.35065e-11	6.90039e-10	FALSE	TRUE	FALSE
TUBA1B	6.08659e-35	2.88919e-33	-72.2037	-159.251	13	7	247.383	0	0	0	0	0.602702	1	1.7067e-30	1.81317e-28	FALSE	TRUE	FALSE
TUBA1C	1.00492e-11	1.12946e-10	-67.7113	-99.3112	13	7	132.859	0	0	0	0	0.519031	1	1.70577e-21	1.11928e-19	FALSE	TRUE	FALSE
TUBA4A	5.79918e-08	4.2841e-07	-46.0123	-68.278	13	7	25.5389	0	0	0	0	0.327339	1	1.10785e-08	2.48403e-07	FALSE	TRUE	FALSE
TUBB4B	8.78865e-15	1.31594e-13	-48.2044	-87.2576	13	7	36.7921	0	0	0	0	0.757602	1	0.00298128	0.0201859	FALSE	FALSE	FALSE
TUBB6	2.91095e-19	5.77274e-18	-38.6318	-88.4773	13	7	17.5848	0	0	0	0	0.570215	1	0.718464	0.946218	FALSE	FALSE	FALSE
TUFM	2.63223e-10	2.60422e-09	-54.2424	-82.3505	13	7	52.1011	0	0	0	0	0.142592	1	0.000869656	0.00722608	FALSE	FALSE	FALSE
TXNIP	4.58613e-28	1.50465e-26	-40.0606	-110.865	13	7	34.0301	0	0	0	0	0.0830378	1	0.141819	0.359457	FALSE	FALSE	FALSE
TXNRD1	7.95788e-17	1.38164e-15	-35.6221	-79.6121	13	7	18.4945	0	0	0	0	0.974543	1	8.36186e-14	3.09646e-12	FALSE	TRUE	FALSE
UBA5	6.36015e-16	1.03573e-14	-83.529	-125.341	13	7	247.891	0	0	0	0	0.82406	1	0.276374	0.55674	FALSE	FALSE	FALSE
UBA52	7.82438e-35	3.67499e-33	-75.9685	-162.759	13	7	204.716	0	0	0	0	0.999966	1	2.59894e-05	0.000331328	FALSE	TRUE	FALSE
UBE2L6	0.00152877	0.00538813	-29.8699	-40.5899	13	7	4.49144	0	0	0	0	0.931015	1	0.962821	1	FALSE	FALSE	FALSE
UBE2S	0.00107029	0.00388264	-38.968	-50.1157	13	7	7.72673	0	0	0	0	0.578968	1	0.649493	0.905636	FALSE	FALSE	FALSE
UBE3A	1.23371e-07	8.57446e-07	-48.4452	-69.8837	13	7	17.5309	0	0	0	0	0.107717	1	0.755957	0.968209	FALSE	FALSE	FALSE
UBL3	0.00300905	0.0098146	-33.131	-43.0296	13	7	5.40683	0	0	0	0	0.506253	1	0.905956	1	FALSE	FALSE	FALSE
UBL5	5.34545e-35	2.56467e-33	-61.0554	-148.235	13	7	86.4287	0	0	0	0	1	1	0.000241594	0.00236402	FALSE	FALSE	FALSE
UBN2	1.57965e-06	9.44825e-06	-22.1072	-40.7282	13	7	2.81389	0	0	0	0	0.999815	1	2.63897e-15	1.13222e-13	FALSE	TRUE	FALSE
UBXN6	8.58293e-07	5.3043e-06	-38.0646	-57.3633	13	7	11.2696	0	0	0	0	0.815639	1	0.972762	1	FALSE	FALSE	FALSE
UCHL1	0.000110879	0.000505871	-63.2809	-77.0898	13	7	43.0197	0	0	0	0	0.823678	1	0.0163711	0.0777934	FALSE	FALSE	FALSE
UCHL5	0.000169496	0.000743019	-36.5507	-49.8681	13	7	10.7685	0	0	0	0	0.473181	1	0.0300354	0.120814	FALSE	FALSE	FALSE
UFL1	1.55734e-14	2.28581e-13	-53.8693	-92.3201	13	7	43.3504	0	0	0	0	0.294678	1	0.116666	0.316468	FALSE	FALSE	FALSE
UGCG	8.53037e-08	6.06091e-07	-34.6959	-56.539	13	7	7.46193	0	0	0	0	0.989982	1	0.520959	0.809373	FALSE	FALSE	FALSE
UGDH	0.000468228	0.00186539	-33.9813	-46.1101	13	7	7.73099	0	0	0	0	0.548566	1	0.284178	0.568867	FALSE	FALSE	FALSE
UGP2	2.56874e-05	0.000129219	-47.1959	-62.6808	13	7	25.0869	0	0	0	0	0.999508	1	0.00224981	0.0158839	FALSE	FALSE	FALSE
UPF3B	4.28135e-05	0.00020742	-40.2	-55.1024	13	7	11.9384	0	0	0	0	0.11776	1	0.913187	1	FALSE	FALSE	FALSE
UPP1	2.01534e-05	0.000102889	-38.4083	-54.1689	13	7	11.0847	0	0	0	0	0.155089	1	0.651731	0.907056	FALSE	FALSE	FALSE
UQCR10	1.20625e-06	7.34285e-06	-39.5274	-58.4483	13	7	21.7637	0	0	0	0	0.999931	1	1.81065e-09	4.36709e-08	FALSE	TRUE	FALSE
UQCRB	5.45161e-06	3.03305e-05	-60.5438	-77.7801	13	7	38.3608	0	0	0	0	0.990917	1	0.230982	0.495024	FALSE	FALSE	FALSE
UQCRC2	0.0010459	0.00380342	-52.9516	-64.1269	13	7	31.1978	0	0	0	0	0.249646	1	0.00199895	0.0145021	FALSE	FALSE	FALSE
UQCRFS1	3.67822e-42	2.24825e-40	-59.9695	-163.991	13	7	86.7449	0	0	0	0	0.93935	1	0.0759978	0.23444	FALSE	FALSE	FALSE
URI1	3.87977e-18	7.24333e-17	-84.6044	-131.751	13	7	266.546	0	0	0	0	0.736336	1	4.89273e-11	1.39053e-09	FALSE	TRUE	FALSE
UROS	1.41854e-06	8.54188e-06	-37.8691	-56.6097	13	7	8.99896	0	0	0	0	0.923521	1	0.727661	0.952986	FALSE	FALSE	FALSE
USO1	8.07653e-05	0.000376567	-34.1957	-48.37	13	7	9.05955	0	0	0	0	0.0316635	1	0.756473	0.968268	FALSE	FALSE	FALSE
USP10	0.000352442	0.00144143	-30.7606	-43.2234	13	7	4.44972	0	0	0	0	0.10446	1	0.0840286	0.251913	FALSE	FALSE	FALSE
USP40	0.00135045	0.00482442	-25.3087	-36.1779	13	7	3.23939	0	0	0	0	0.896309	1	0.700606	0.937363	FALSE	FALSE	FALSE
USP9X	3.33804e-10	3.23789e-09	-55.9247	-83.7777	13	7	57.4319	0	0	0	0	0.85385	1	1.02264e-19	5.92601e-18	FALSE	TRUE	FALSE
UTP3	6.69646e-06	3.67072e-05	-68.8147	-85.8199	13	7	67.7533	0	0	0	0	0.141444	1	0.708042	0.941803	FALSE	FALSE	FALSE
UTRN	0.00128828	0.00462245	-31.2498	-42.1755	13	7	4.05029	0	0	0	0	0.983616	1	0.444255	0.742878	FALSE	FALSE	FALSE
UTY	2.9611e-17	5.26392e-16	-19.9975	-65.0215	13	7	3.88811	0	0	0	0	0.933191	1	0.54107	0.825897	FALSE	FALSE	FALSE
VCAM1	2.16599e-22	5.46025e-21	-24.1366	-81.4597	13	7	6.6926	0	0	0	0	0.999199	1	2.36506e-26	2.11058e-24	FALSE	TRUE	FALSE
VDAC2	6.75262e-07	4.2433e-06	-45.9875	-65.552	13	7	24.9408	0	0	0	0	0.0836175	1	0.430776	0.729326	FALSE	FALSE	FALSE
VEGFA	0.000101642	0.000468521	-21.1334	-35.0428	13	7	3.67663	0	0	0	0	0.44652	1	0.268204	0.547476	FALSE	FALSE	FALSE
VEZF1	0.000554182	0.0021615	-34.0886	-46.0185	13	7	8.83602	0	0	0	0	0.942093	1	0.443313	0.742505	FALSE	FALSE	FALSE
VIM	0.000393326	0.00159402	-73.9296	-86.2636	13	7	111.532	0	0	0	0	0.270593	1	0.00227708	0.0160511	FALSE	FALSE	FALSE
VIT	1.15709e-06	7.06284e-06	-18.1425	-37.1096	13	7	2.74566	0	0	0	0	0.986908	1	0.232839	0.497334	FALSE	FALSE	FALSE
VMP1	3.70172e-08	2.82826e-07	-48.0845	-70.8407	13	7	25.5424	0	0	0	0	0.202291	1	9.87254e-05	0.00108234	FALSE	FALSE	FALSE
VPS35L	0.000586726	0.00227057	-30.8208	-42.6833	13	7	4.56873	0	0	0	0	0.660113	1	0.761154	0.970085	FALSE	FALSE	FALSE
VPS37B	0.000621643	0.00238912	-21.4882	-33.2822	13	7	2.06989	0	0	0	0	0.24218	1	0.212728	0.469433	FALSE	FALSE	FALSE
VPS50	6.37138e-53	5.80186e-51	-35.1173	-164.348	13	7	16.3583	0	0	0	0	0.991288	1	3.94233e-09	9.35675e-08	FALSE	TRUE	FALSE
VPS54	0.000118085	0.000534918	-34.0237	-47.7599	13	7	5.46643	0	0	0	0	0.449293	1	0.453762	0.752392	FALSE	FALSE	FALSE
WASHC1	3.47837e-07	2.24935e-06	-33.2939	-53.5917	13	7	5.86626	0	0	0	0	0.298131	1	0.300597	0.589826	FALSE	FALSE	FALSE
WASHC4	2.0949e-09	1.87323e-08	-62.8514	-88.7257	13	7	60.4237	0	0	0	0	0.352467	1	2.23461e-07	4.10322e-06	FALSE	TRUE	FALSE
WDR91	1.12788e-06	6.90342e-06	-19.9756	-38.9711	13	7	2.99713	0	0	0	0	0.999939	1	0.655553	0.909196	FALSE	FALSE	FALSE
WSB1	6.83176e-06	3.74028e-05	-33.7958	-50.7785	13	7	7.51002	0	0	0	0	0.139461	1	0.49638	0.787361	FALSE	FALSE	FALSE
XBP1	4.77665e-12	5.56486e-11	-32.0736	-64.4653	13	7	6.35963	0	0	0	0	0.813309	1	3.20284e-14	1.2536e-12	FALSE	TRUE	FALSE
XPO1	0.000195468	0.000842682	-40.0998	-53.2514	13	7	12.4402	0	0	0	0	1	1	9.21698e-24	7.09072e-22	FALSE	TRUE	FALSE
XPO4	0.0007354	0.00278317	-20.2389	-31.8337	13	7	2.55123	0	0	0	0	0.999883	1	0.125987	0.332635	FALSE	FALSE	FALSE
XPO6	0.000172252	0.000752042	-41.7701	-55.0687	13	7	12.6251	0	0	0	0	0.921232	1	0.00649439	0.03828	FALSE	FALSE	FALSE
XRCC4	3.68555e-06	2.09223e-05	-45.0189	-62.6941	13	7	14.6898	0	0	0	0	0.48565	1	0.548324	0.830255	FALSE	FALSE	FALSE
XRCC6	5.57194e-09	4.75373e-08	-88.3821	-113.198	13	7	329.996	0	0	0	0	0.855396	1	8.60831e-08	1.65562e-06	FALSE	TRUE	FALSE
XYLB	8.66463e-22	1.99286e-20	-28.0913	-83.9782	13	7	6.65691	0	0	0	0	0.789283	1	0.0711023	0.223422	FALSE	FALSE	FALSE
YTHDF2	9.4223e-07	5.80695e-06	-67.9982	-87.1934	13	7	88.5439	0	0	0	0	0.34848	1	0.000163684	0.00167899	FALSE	FALSE	FALSE
YWHAB	7.47871e-06	4.07448e-05	-53.6059	-70.4868	13	7	51.5326	0	0	0	0	0.938809	1	1.24926e-12	3.98157e-11	FALSE	TRUE	FALSE
ZAN	0.000195397	0.000842682	-19.6167	-32.7687	13	7	2.3273	0	0	0	0	1	1	1	1	FALSE	FALSE	FALSE
ZBED5	1.72004e-06	1.02195e-05	-62.1808	-80.7069	13	7	75.6279	0	0	0	0	0.971179	1	1.21718e-21	8.10603e-20	FALSE	TRUE	FALSE
ZC3H12A	0.00205093	0.00696972	-24.2628	-34.6279	13	7	4.52424	0	0	0	0	0.256437	1	0.670147	0.919664	FALSE	FALSE	FALSE
ZC3HAV1	1.83835e-20	3.81522e-19	-57.2126	-109.93	13	7	205.99	0	0	0	0	1	1	3.59369e-93	1.78167e-90	FALSE	TRUE	FALSE
ZEB2	5.54225e-14	7.76185e-13	-16.941	-54.0534	13	7	2.6744	0	0	0	0	1	1	7.63921e-19	3.91795e-17	FALSE	TRUE	FALSE
ZFAND2A	3.20115e-05	0.000157798	-29.9054	-45.1397	13	7	3.37426	0	0	0	0	0.333857	1	0.000740957	0.00626165	FALSE	FALSE	FALSE
ZFAND5	8.71148e-15	1.30878e-13	-42.1405	-81.203	13	7	23.5382	0	0	0	0	0.758749	1	0.115869	0.315442	FALSE	FALSE	FALSE
ZFP36	2.38346e-05	0.000120169	-24.7801	-40.3501	13	7	3.48184	0	0	0	0	0.972284	1	9.95805e-12	2.96219e-10	FALSE	TRUE	FALSE
ZFR	0.000753687	0.00284754	-44.9697	-56.5354	13	7	13.516	0	0	0	0	0.979736	1	0.371752	0.670206	FALSE	FALSE	FALSE
ZFY	0.00033069	0.00136245	-59.095	-71.6326	13	7	37.3262	0	0	0	0	0.0575454	1	0.498543	0.78884	FALSE	FALSE	FALSE
ZMYND11	1.51926e-06	9.1115e-06	-47.5524	-66.2167	13	7	20.5673	0	0	0	0	0.129857	1	0.704661	0.939615	FALSE	FALSE	FALSE
ZMYND8	2.6514e-07	1.74672e-06	-60.0456	-80.6428	13	7	65.5319	0	0	0	0	0.999991	1	1.69483e-06	2.79053e-05	FALSE	TRUE	FALSE
ZNF157	4.03883e-16	6.67454e-15	-23.9962	-66.2847	13	7	7.3078	0	0	0	0	1	1	1	1	FALSE	FALSE	FALSE
ZNF20	2.70616e-11	2.97411e-10	-24.6534	-55.1969	13	7	4.22991	0	0	0	0	0.87294	1	0.915056	1	FALSE	FALSE	FALSE
ZNF200	2.01814e-22	5.11645e-21	-23.613	-81.0093	13	7	7.20761	0	0	0	0	1	1	4.52527e-31	5.04794e-29	FALSE	TRUE	FALSE
ZNF207	0.000763387	0.00288175	-46.8345	-58.385	13	7	17.9149	0	0	0	0	0.574715	1	0.614246	0.880709	FALSE	FALSE	FALSE
ZNF25	2.33994e-06	1.3756e-05	-18.7645	-36.9475	13	7	2.55789	0	0	0	0	1	1	1	1	FALSE	FALSE	FALSE
ZNF283	6.28691e-48	4.72646e-46	-31.4922	-149.035	13	7	16.3345	0	0	0	0	0.847684	1	0.00889017	0.0488569	FALSE	FALSE	FALSE
ZNF385A	1.74096e-21	3.86476e-20	-30.4323	-85.5959	13	7	7.83927	0	0	0	0	0.89622	1	0.948968	1	FALSE	FALSE	FALSE
ZNF451	0.00292572	0.009606	-52.7324	-62.6653	13	7	39.5006	0	0	0	0	1	1	7.27821e-17	3.41846e-15	FALSE	TRUE	FALSE
ZNF462	0.00167922	0.00585367	-29.7887	-40.3956	13	7	4.98849	0	0	0	0	1	1	3.02414e-17	1.4355e-15	FALSE	TRUE	FALSE
ZNF546	2.04345e-15	3.17695e-14	-24.5156	-65.1027	13	7	6.51175	0	0	0	0	0.99982	1	0.96211	1	FALSE	FALSE	FALSE
ZNF574	0.0017324	0.00601555	-27.0274	-37.5966	13	7	2.94949	0	0	0	0	0.13629	1	0.195241	0.443567	FALSE	FALSE	FALSE
ZNF608	0.000127591	0.000573902	-20.7822	-34.4288	13	7	1.92086	0	0	0	0	0.752995	1	0.799004	0.98485	FALSE	FALSE	FALSE
ZNF639	0.000413646	0.00166879	-28.0559	-40.3307	13	7	3.61862	0	0	0	0	0.739404	1	0.461106	0.757531	FALSE	FALSE	FALSE
ZNF644	7.54911e-07	4.70449e-06	-55.4064	-74.8474	13	7	40.1205	0	0	0	0	0.00516263	1	0.305905	0.59423	FALSE	FALSE	FALSE
ZNF711	4.02814e-08	3.05673e-07	-31.8864	-54.5503	13	7	12.5673	0	0	0	0	0.464029	1	0.933629	1	FALSE	FALSE	FALSE
ZNF780B	0.000168592	0.000741139	-23.7947	-37.1183	13	7	3.02715	0	0	0	0	0.999878	1	0.570509	0.846779	FALSE	FALSE	FALSE
ZNF799	6.74092e-12	7.75205e-11	-19.4259	-51.451	13	7	3.0883	0	0	0	0	0.702219	1	0.966434	1	FALSE	FALSE	FALSE
ZNF821	0.000174194	0.00075978	-26.6119	-39.8974	13	7	4.99071	0	0	0	0	0.663869	1	0.769383	0.97639	FALSE	FALSE	FALSE
ZNF85	3.33787e-06	1.91188e-05	-14.3674	-32.1535	13	7	2.12033	0	0	0	0	0.972545	1	0.143881	0.362506	FALSE	FALSE	FALSE
ZNF875	5.91995e-138	6.6037e-135	-37.7335	-364.604	13	7	76.1675	0	0	0	0	0.518437	1	5.54173e-07	9.62148e-06	FALSE	TRUE	FALSE
ZRSR2	1.27765e-09	1.18031e-08	-37.2973	-63.7054	13	7	8.76525	0	0	0	0	0.961588	1	0.0119249	0.061582	FALSE	FALSE	FALSE
G	6.64631e-23	1.72418e-21	-139.708	-198.254	13	7	49681.8	0	0	0	0	0.958736	1	2.17618e-40	3.23671e-38	FALSE	TRUE	FALSE
L	8.71159e-46	6.26954e-44	-107.378	-219.903	13	7	3292.17	0	0	0	0	0.765724	1	3.19436e-91	1.42532e-88	FALSE	TRUE	FALSE
M	9.31634e-26	2.7899e-24	-92.7022	-158.034	13	7	2117.75	0	0	0	0	0.998316	1	1.81459e-55	3.85558e-53	FALSE	TRUE	FALSE
N	2.50885e-123	1.86575e-120	-130.424	-423.396	13	7	34220	0	0	0	0	0.319303	1	2.92842e-210	1.30666e-206	FALSE	TRUE	FALSE
NS	1.09396e-37	5.81102e-36	-126.769	-220.279	13	7	36438.8	0	0	0	0	0.640216	1	2.73547e-61	6.78093e-59	FALSE	TRUE	FALSE

## Sheet: DEGs_time_fibroblast
Gene	p	padj	loglik_full	loglik_red	df_full	df_red	mean	converge_impulse	converge_const	converge_sigmoid	impulseTOsigmoid_p	impulseTOsigmoid_padj	sigmoidTOconst_p	sigmoidTOconst_padj	isTransient	isMonotonous	allZero
AATF	3.40219e-08	2.73783e-06	-27.9592	-49.5477	7	2	43.2104	0	0	0	0.921267	1	2.44551e-09	2.20895e-07	FALSE	TRUE	FALSE
AKAP8L	0.000103717	0.00326262	-20.226	-33.0575	7	2	11.9872	0	0	0	0.999992	1	1.12196e-05	0.000407031	FALSE	TRUE	FALSE
AKIRIN2	1.16732e-11	1.98714e-09	-30.8733	-60.9158	7	2	75.2586	0	0	0	0.965341	1	5.83681e-13	1.12321e-10	FALSE	TRUE	FALSE
ANKRD12	3.03541e-05	0.00116824	-42.3137	-56.5153	7	2	170.255	0	0	0	0.156639	1	1.78773e-05	0.000618164	FALSE	TRUE	FALSE
ANKRD17	1.15652e-06	6.82501e-05	-38.7723	-56.5585	7	2	169.233	0	0	0	0.0511299	1	1.65447e-06	7.85011e-05	FALSE	TRUE	FALSE
ANKRD26	0.000132953	0.00403048	-39.8233	-52.376	7	2	143.267	0	0	0	0.0636514	1	0.000205742	0.00474279	FALSE	FALSE	FALSE
ARGLU1	6.97493e-05	0.00233871	-18.1426	-31.4181	7	2	9.33574	0	0	0	0.873687	1	8.32878e-06	0.000320148	FALSE	TRUE	FALSE
ARHGAP5	5.43215e-05	0.00192342	-26.4579	-40.0124	7	2	23.775	0	0	0	0.000738028	0.341531	0.00536748	0.0672987	FALSE	FALSE	FALSE
ARHGEF28	0.000179871	0.00516954	-30.865	-43.0774	7	2	52.6806	0	0	0	0.140266	1	0.000133924	0.00350738	FALSE	FALSE	FALSE
ARID4B	1.08904e-09	1.09547e-07	-60.7984	-86.0541	7	2	2348.24	0	0	0	0.00741993	0.86462	7.55566e-09	5.8669e-07	FALSE	TRUE	FALSE
ATG3	0.00036158	0.00930437	-25.1513	-36.5732	7	2	23.7087	0	0	0	0.891441	1	4.85996e-05	0.00148346	FALSE	FALSE	FALSE
ATP6V1H	4.72194e-09	4.17986e-07	-30.007	-53.704	7	2	57.2729	0	0	0	0.822207	1	3.47142e-10	3.49193e-08	FALSE	TRUE	FALSE
ATRX	1.10438e-07	8.14662e-06	-53.4201	-73.7449	7	2	908.381	0	0	0	0.000156341	0.225301	3.80761e-05	0.00122119	FALSE	FALSE	FALSE
BCLAF1	3.17246e-06	0.000165192	-32.0444	-48.7311	7	2	67.2509	0	0	0	0.999987	1	2.68639e-07	1.62876e-05	FALSE	TRUE	FALSE
BDP1	0.000260475	0.00719404	-28.4259	-40.2199	7	2	31.9933	0	0	0	0.0291244	1	0.000888775	0.0159907	FALSE	FALSE	FALSE
BEND5	0.000297358	0.0079764	-24.3328	-35.9767	7	2	16.6608	0	0	0	0.850013	1	4.11087e-05	0.00129041	FALSE	FALSE	FALSE
BRD2	3.59763e-06	0.000180945	-38.2415	-54.7908	7	2	159.095	0	0	0	0.99914	1	3.07274e-07	1.83783e-05	FALSE	TRUE	FALSE
BRD8	2.94695e-08	2.41541e-06	-44.5603	-66.3026	7	2	285.968	0	0	0	0.143212	1	1.29665e-08	9.8948e-07	FALSE	TRUE	FALSE
BRIX1	0.000349085	0.00903538	-29.0416	-40.5035	7	2	31.8453	0	0	0	1	1	4.1888e-05	0.00130561	FALSE	FALSE	FALSE
CALM2	5.96108e-05	0.00209395	-27.6906	-41.1415	7	2	41.3458	0	0	0	0.961641	1	6.41079e-06	0.000255468	FALSE	TRUE	FALSE
CARS1	0.000370254	0.00941806	-27.5513	-38.9463	7	2	29.062	0	0	0	0.572298	1	7.62649e-05	0.00216377	FALSE	FALSE	FALSE
CARS2	9.04809e-05	0.00294462	-22.4426	-35.4271	7	2	15.6736	0	0	0	0.711766	1	1.34348e-05	0.0004757	FALSE	TRUE	FALSE
CCDC173	0.000304721	0.00807601	-31.4789	-43.0951	7	2	38.7142	0	0	0	0.0172847	1	0.00171972	0.027678	FALSE	FALSE	FALSE
CCNL1	7.39602e-05	0.00244289	-27.9865	-41.1966	7	2	33.4139	0	0	0	0.568848	1	1.34165e-05	0.0004757	FALSE	TRUE	FALSE
CDH10	0.000181134	0.00517224	-12.5161	-24.7207	7	2	4.11999	0	0	0	0.746794	1	2.71703e-05	0.000890783	FALSE	TRUE	FALSE
CDKN1A	1.48302e-09	1.39656e-07	-25.6273	-50.5553	7	2	32.2701	0	0	0	0.651085	1	1.30583e-10	1.4449e-08	FALSE	TRUE	FALSE
CEBPZ	5.624e-06	0.00025929	-50.2463	-66.3065	7	2	465.588	0	0	0	0.823997	1	5.95688e-07	3.21526e-05	FALSE	TRUE	FALSE
CERT1	3.76324e-06	0.000187147	-33.5013	-50.0014	7	2	58.9143	0	0	0	0.516736	1	6.11352e-07	3.26005e-05	FALSE	TRUE	FALSE
CHD2	1.92062e-07	1.34931e-05	-29.3795	-49.1085	7	2	47.9181	0	0	0	0.1565	1	8.46387e-08	5.67592e-06	FALSE	TRUE	FALSE
CHD5	1.64305e-10	2.13886e-08	-26.816	-54.0731	7	2	34.8895	0	0	0	0.11666	1	7.18197e-11	8.59118e-09	FALSE	TRUE	FALSE
CIART	9.8323e-05	0.00315346	-14.5565	-27.4479	7	2	5.43314	0	0	0	0.995433	1	1.06372e-05	0.000389093	FALSE	TRUE	FALSE
CLK1	3.22058e-17	1.58381e-14	-33.6154	-76.9944	7	2	126.733	0	0	0	0.414888	1	2.59692e-18	1.27711e-15	FALSE	TRUE	FALSE
CLK4	2.82908e-08	2.36255e-06	-22.8246	-44.6105	7	2	20.5555	0	0	0	0.26379	1	6.84388e-09	5.40911e-07	FALSE	TRUE	FALSE
CNOT4	0.000177542	0.00516954	-18.4039	-30.631	7	2	8.41945	0	0	0	0.484548	1	4.02832e-05	0.00127352	FALSE	FALSE	FALSE
COPS5	9.6348e-07	5.84159e-05	-36.5976	-54.5821	7	2	94.2513	0	0	0	0.769044	1	9.81674e-08	6.29694e-06	FALSE	TRUE	FALSE
CPM	8.43188e-12	1.49278e-09	-24.5343	-54.9184	7	2	32.6832	0	0	0	0.610462	1	6.54615e-13	1.15893e-10	FALSE	TRUE	FALSE
CRNKL1	0.000136498	0.00408202	-27.036	-39.5591	7	2	26.8144	0	0	0	1	1	1.51005e-05	0.000526258	FALSE	TRUE	FALSE
CWC15	1.92602e-05	0.000782071	-38.8484	-53.5536	7	2	142.752	0	0	0	0.986556	1	1.86013e-06	8.57596e-05	FALSE	TRUE	FALSE
CXCL10	3.76963e-26	8.3422e-23	-26.7645	-91.2939	7	2	99.4888	0	0	0	0.0103536	0.86462	8.03735e-26	1.18578e-22	FALSE	TRUE	FALSE
CXCL11	9.96677e-10	1.05031e-07	-17.2922	-42.6418	7	2	12.1653	0	0	0	0.999321	1	5.67353e-11	7.17459e-09	FALSE	TRUE	FALSE
CXCL2	4.01352e-05	0.00149276	-16.7151	-30.6065	7	2	7.21164	0	0	0	0.406508	1	9.61818e-06	0.000357732	FALSE	TRUE	FALSE
CYLD	1.28418e-05	0.000541312	-17.9346	-33.0873	7	2	8.83649	0	0	0	0.513758	1	2.26853e-06	0.000102454	FALSE	TRUE	FALSE
DDIT3	0.000182871	0.00518839	-20.66	-32.8538	7	2	10.5359	0	0	0	0.959023	1	2.15845e-05	0.000740566	FALSE	TRUE	FALSE
DDX58	2.66966e-06	0.000142361	-23.4169	-40.292	7	2	20.3399	0	0	0	0.693968	1	3.19011e-07	1.88259e-05	FALSE	TRUE	FALSE
DHX58	7.67236e-17	3.39579e-14	-24.5011	-66.9814	7	2	39.9709	0	0	0	0.31474	1	8.29485e-18	3.6713e-15	FALSE	TRUE	FALSE
DNAJC2	2.68243e-05	0.00105066	-23.4912	-37.8298	7	2	19.6295	0	0	0	0.340845	1	7.4054e-06	0.000287511	FALSE	TRUE	FALSE
DST	7.05173e-05	0.00234669	-45.5435	-58.8069	7	2	389.463	0	0	0	6.94855e-05	0.164887	0.060782	0.397246	FALSE	FALSE	FALSE
EEA1	2.36606e-06	0.000130902	-31.5226	-48.5295	7	2	69.273	0	0	0	0.000848813	0.341531	0.000180571	0.00436724	FALSE	FALSE	FALSE
EIF4A2	2.78013e-05	0.00107937	-27.3853	-41.6843	7	2	28.1271	0	0	0	0.0127748	0.958327	0.000179965	0.00436724	FALSE	FALSE	FALSE
EIF5	3.27786e-05	0.00124271	-27.9148	-42.0311	7	2	35.5366	0	0	0	0.998537	1	3.25033e-06	0.00013967	FALSE	TRUE	FALSE
ELF3	3.76071e-10	4.49863e-08	-13.4521	-39.8339	7	2	9.11214	0	0	0	0.0727095	1	2.6925e-10	2.83738e-08	FALSE	TRUE	FALSE
EPC1	3.58562e-06	0.000180945	-21.7258	-38.2788	7	2	16.2199	0	0	0	0.174104	1	1.66722e-06	7.85011e-05	FALSE	TRUE	FALSE
ETAA1	6.1852e-05	0.00215557	-25.0669	-38.4766	7	2	22.255	0	0	0	0.99342	1	6.46463e-06	0.000255468	FALSE	TRUE	FALSE
EXOSC9	7.31687e-07	4.62635e-05	-40.2855	-58.5685	7	2	152.272	0	0	0	0.943049	1	6.01831e-08	4.36672e-06	FALSE	TRUE	FALSE
EXTL2	0.000249158	0.00693569	-37.7377	-49.5821	7	2	97.0424	0	0	0	7.45085e-05	0.164887	0.196834	0.797846	FALSE	FALSE	FALSE
FBXW7	1.37481e-07	9.81436e-06	-22.6139	-42.703	7	2	17.0108	0	0	0	0.115226	1	8.03056e-08	5.46819e-06	FALSE	TRUE	FALSE
FIS1	8.85251e-05	0.00290231	-24.5061	-37.5151	7	2	18.947	0	0	0	1	1	9.45541e-06	0.000354658	FALSE	TRUE	FALSE
FMR1	3.0554e-07	2.04897e-05	-36.8759	-56.1039	7	2	106.652	0	0	0	0.297905	1	7.36524e-08	5.17437e-06	FALSE	TRUE	FALSE
FNBP4	1.54601e-05	0.00064553	-32.6933	-47.6413	7	2	73.2664	0	0	0	0.999455	1	1.4521e-06	7.06261e-05	FALSE	TRUE	FALSE
FNIP2	0.000100182	0.00318996	-18.5119	-31.3823	7	2	8.13402	0	0	0	0.00169017	0.498714	0.00469118	0.0614295	FALSE	FALSE	FALSE
FRMD6	4.78531e-10	5.57362e-08	-20.3583	-46.4852	7	2	17.2126	0	0	0	0.00388388	0.73613	6.07141e-09	4.88583e-07	FALSE	TRUE	FALSE
GADD45B	1.3261e-11	2.09619e-09	-26.226	-56.1345	7	2	36.1107	0	0	0	0.028358	1	2.13345e-11	3.14755e-09	FALSE	TRUE	FALSE
GAPVD1	0.000368943	0.00941806	-23.2235	-34.6225	7	2	18.4393	0	0	0	0.963658	1	4.61028e-05	0.00142693	FALSE	FALSE	FALSE
GPBP1	6.13284e-13	1.47363e-10	-34.5364	-67.6673	7	2	117.599	0	0	0	1	1	2.69415e-14	7.01429e-12	FALSE	TRUE	FALSE
GTF2H1	0.000161381	0.00476181	-25.1276	-37.4623	7	2	21.9458	0	0	0	0.258709	1	6.63266e-05	0.0019187	FALSE	FALSE	FALSE
HNRNPH3	3.49484e-05	0.00131086	-29.5396	-43.5848	7	2	39.5255	0	0	0	0.999823	1	3.47748e-06	0.000147994	FALSE	TRUE	FALSE
HSP90B1	0.000262484	0.00719404	-38.1935	-49.9788	7	2	158.119	0	0	0	0.0212052	1	0.00120937	0.0203524	FALSE	FALSE	FALSE
IFI44	5.44799e-18	3.0141e-15	-18.9017	-64.1185	7	2	25.702	0	0	0	0.993373	1	1.77944e-19	9.84476e-17	FALSE	TRUE	FALSE
IFIH1	1.59371e-12	3.52687e-10	-19.2544	-51.3857	7	2	17.6023	0	0	0	0.482363	1	1.47863e-13	3.11638e-11	FALSE	TRUE	FALSE
IFIT2	9.85484e-25	1.45392e-21	-25.2766	-86.4639	7	2	75.6093	0	0	0	0.752299	1	3.15208e-26	6.97555e-23	FALSE	TRUE	FALSE
IFIT3	1.19279e-13	3.29955e-11	-30.5704	-65.412	7	2	64.5929	0	0	0	0.801924	1	6.20334e-15	1.96114e-12	FALSE	TRUE	FALSE
IFRD1	1.18212e-09	1.16268e-07	-24.6489	-49.8175	7	2	30.3525	0	0	0	0.428376	1	1.55482e-10	1.67844e-08	FALSE	TRUE	FALSE
INTS2	5.82963e-11	8.3232e-09	-24.8844	-53.2345	7	2	30.8683	0	0	0	0.0736618	1	3.85842e-11	5.17496e-09	FALSE	TRUE	FALSE
IRF1	6.01968e-10	6.66078e-08	-20.2801	-46.164	7	2	16.4871	0	0	0	0.934372	1	3.58763e-11	4.96214e-09	FALSE	TRUE	FALSE
ISG15	1.60104e-19	1.18103e-16	-26.3111	-75.1688	7	2	56.954	0	0	0	0.334091	1	1.42554e-20	1.05158e-17	FALSE	TRUE	FALSE
IWS1	7.55955e-06	0.000338856	-55.5802	-71.3159	7	2	1076.4	0	0	0	1	1	6.76379e-07	3.53524e-05	FALSE	TRUE	FALSE
JMJD1C	6.72717e-08	5.13353e-06	-25.2826	-46.14	7	2	29.3787	0	0	0	0.890689	1	5.16416e-09	4.31256e-07	FALSE	TRUE	FALSE
JUN	1.90505e-10	2.40907e-08	-29.1803	-56.2811	7	2	54.6739	0	0	0	0.413137	1	2.42086e-11	3.45636e-09	FALSE	TRUE	FALSE
KDM5B	2.31887e-05	0.000933029	-22.0803	-36.5802	7	2	12.7569	0	0	0	0.797123	1	2.78887e-06	0.000122601	FALSE	TRUE	FALSE
KDM6A	8.63719e-09	7.49572e-07	-23.7925	-46.846	7	2	22.4242	0	0	0	0.955571	1	5.62655e-10	5.29853e-08	FALSE	TRUE	FALSE
KIF21A	2.56259e-06	0.000138318	-30.8564	-47.7763	7	2	41.7819	0	0	0	0.0124854	0.952764	1.49055e-05	0.000523586	FALSE	TRUE	FALSE
KIN	0.000391842	0.00990955	-22.4529	-33.7834	7	2	14.0757	0	0	0	1	1	4.75165e-05	0.00146047	FALSE	FALSE	FALSE
KMT2E	1.88393e-06	0.000108289	-23.3288	-40.584	7	2	21.371	0	0	0	0.846964	1	1.81669e-07	1.1367e-05	FALSE	TRUE	FALSE
KPNA5	6.33604e-05	0.00219089	-16.5696	-29.9524	7	2	5.76867	0	0	0	0.00948629	0.86462	0.000571073	0.0112838	FALSE	FALSE	FALSE
LAYN	7.57947e-06	0.000338856	-27.2349	-42.9677	7	2	40.767	0	0	0	0.999007	1	6.78932e-07	3.53524e-05	FALSE	TRUE	FALSE
LIG4	0.000115583	0.00360262	-25.7053	-38.4152	7	2	26.7634	0	0	0	0.237097	1	5.03218e-05	0.00152551	FALSE	FALSE	FALSE
MDM2	1.97708e-09	1.82304e-07	-25.9465	-50.5693	7	2	31.3645	0	0	0	0.989407	1	1.16869e-10	1.32632e-08	FALSE	TRUE	FALSE
METTL22	0.000332173	0.00869938	-24.335	-35.8533	7	2	20.7293	0	0	0	0.999998	1	3.96801e-05	0.00126348	FALSE	FALSE	FALSE
MIER1	6.62676e-05	0.00223894	-33.6107	-46.9434	7	2	85.0832	0	0	0	0.035915	1	0.000168752	0.00413781	FALSE	FALSE	FALSE
MMD	0.000119279	0.00369182	-12.6596	-25.3342	7	2	4.2771	0	0	0	0.0377249	1	0.000301508	0.00654154	FALSE	FALSE	FALSE
MRPL15	4.41653e-06	0.000214808	-34.1679	-50.4928	7	2	107.014	0	0	0	0.942862	1	4.04211e-07	2.32343e-05	FALSE	TRUE	FALSE
MT-ND4	0.000394054	0.00990955	-56.3708	-67.6949	7	2	1347.91	0	0	0	0.00406893	0.73613	0.00872621	0.101105	FALSE	FALSE	FALSE
MXD1	0.000300782	0.00801964	-13.0196	-24.6506	7	2	4.08477	0	0	0	0.0186389	1	0.00157972	0.0257052	FALSE	FALSE	FALSE
MYH3	1.88022e-06	0.000108289	-11.0745	-28.3319	7	2	4.69649	0	0	0	0.344199	1	4.34836e-07	2.46741e-05	FALSE	TRUE	FALSE
NEURL3	6.32604e-13	1.47363e-10	-22.2267	-55.3251	7	2	24.8845	0	0	0	0.632854	1	4.36582e-14	1.07351e-11	FALSE	TRUE	FALSE
NFKBIA	7.86125e-22	8.69847e-19	-43.0598	-97.3901	7	2	446.62	0	0	0	0.0355981	1	5.80254e-22	5.13641e-19	FALSE	TRUE	FALSE
NFKBIZ	1.27537e-09	1.22713e-07	-34.0271	-59.1152	7	2	88.7746	0	0	0	0.0427542	1	1.60697e-09	1.48176e-07	FALSE	TRUE	FALSE
NOP58	0.000131937	0.00402725	-37.7161	-50.2774	7	2	130.049	0	0	0	0.651793	1	2.19745e-05	0.000748149	FALSE	TRUE	FALSE
NR1D1	1.56016e-36	6.90528e-33	-29.0054	-117.917	7	2	135.976	0	0	0	0.91812	1	2.83342e-38	1.25407e-34	FALSE	TRUE	FALSE
NR3C1	7.69788e-08	5.77471e-06	-23.8562	-44.5689	7	2	20.7284	0	0	0	0.961977	1	5.51753e-09	4.52233e-07	FALSE	TRUE	FALSE
NSRP1	3.07189e-09	2.77473e-07	-38.5989	-62.7533	7	2	142.414	0	0	0	0.0506717	1	3.39119e-09	3.00188e-07	FALSE	TRUE	FALSE
OGA	0.000210443	0.00593261	-24.1194	-36.1547	7	2	18.7175	0	0	0	0.995693	1	2.42478e-05	0.000815744	FALSE	TRUE	FALSE
OLFM4	0.000218625	0.00612426	-15.4703	-27.4625	7	2	5.85909	0	0	0	0.856669	1	2.92042e-05	0.000950425	FALSE	TRUE	FALSE
OSER1	5.74255e-06	0.000262026	-20.9037	-36.941	7	2	13.7189	0	0	0	0.0993225	1	4.72424e-06	0.000194117	FALSE	TRUE	FALSE
PCF11	6.92532e-11	9.28833e-09	-25.6091	-53.7777	7	2	34.1491	0	0	0	0.0632122	1	5.35741e-11	6.97408e-09	FALSE	TRUE	FALSE
PELI1	0.000127957	0.00393291	-26.3718	-38.9675	7	2	28.7535	0	0	0	0.451767	1	3.02406e-05	0.000976969	FALSE	TRUE	FALSE
PER1	8.90135e-15	3.03057e-12	-19.2124	-56.7584	7	2	20.2369	0	0	0	0.811138	1	4.25742e-16	1.44949e-13	FALSE	TRUE	FALSE
PMAIP1	1.99636e-14	5.8906e-12	-28.4949	-65.2001	7	2	54.141	0	0	0	0.0786839	1	9.74382e-15	2.69538e-12	FALSE	TRUE	FALSE
PNISR	9.3647e-06	0.000414481	-24.8508	-40.3511	7	2	23.8003	0	0	0	0.950428	1	8.92743e-07	4.5417e-05	FALSE	TRUE	FALSE
PPP1R12A	3.22267e-07	2.12888e-05	-43.8593	-63.0298	7	2	309.47	0	0	0	0.12402	1	1.82737e-07	1.1367e-05	FALSE	TRUE	FALSE
PPP1R15A	9.2288e-05	0.00298151	-26.1849	-39.1472	7	2	26.5906	0	0	0	0.997131	1	9.91751e-06	0.000365791	FALSE	TRUE	FALSE
PPP4R2	7.91031e-07	4.86264e-05	-18.5558	-36.7543	7	2	11.2854	0	0	0	0.999982	1	6.17234e-08	4.40626e-06	FALSE	TRUE	FALSE
PPP4R3B	3.28508e-05	0.00124271	-26.0296	-40.1434	7	2	28.9686	0	0	0	0.0577233	1	5.07532e-05	0.00152706	FALSE	FALSE	FALSE
PRDX1	1.7758e-05	0.000727749	-38.1677	-52.9627	7	2	146.08	0	0	0	0.355728	1	4.5738e-06	0.000190978	FALSE	TRUE	FALSE
PRPF4B	5.75514e-10	6.53135e-08	-34.81	-60.7416	7	2	125.333	0	0	0	0.0758743	1	4.01445e-10	3.94843e-08	FALSE	TRUE	FALSE
PTPN4	0.000268406	0.00724369	-32.2445	-44.0046	7	2	41.887	0	0	0	0.184992	1	0.000158376	0.00399194	FALSE	FALSE	FALSE
RAD21	0.000263315	0.00719404	-33.9069	-45.6886	7	2	72.0445	0	0	0	0.590785	1	5.10631e-05	0.00152706	FALSE	FALSE	FALSE
RBBP6	1.07341e-05	0.000470389	-49.1554	-64.5055	7	2	401.466	0	0	0	0.827006	1	1.18167e-06	5.8112e-05	FALSE	TRUE	FALSE
RBM39	1.21488e-11	1.99151e-09	-32.1297	-62.1301	7	2	90.3325	0	0	0	0.813947	1	7.19434e-13	1.2247e-10	FALSE	TRUE	FALSE
RGS2	6.61031e-05	0.00223894	-18.1575	-31.493	7	2	8.87392	0	0	0	0.999376	1	6.90459e-06	0.00027044	FALSE	TRUE	FALSE
RNF103	2.93477e-06	0.000154634	-33.4137	-50.1854	7	2	73.7448	0	0	0	0.743314	1	3.29938e-07	1.92145e-05	FALSE	TRUE	FALSE
RO60	4.53682e-07	2.91014e-05	-58.6892	-77.4899	7	2	1491.96	0	0	0	0.00229011	0.633501	1.24735e-05	0.000448843	FALSE	TRUE	FALSE
RSL24D1	2.00153e-06	0.000113574	-27.5918	-44.7811	7	2	41.4637	0	0	0	0.888406	1	1.84913e-07	1.1367e-05	FALSE	TRUE	FALSE
RSRC2	2.06424e-12	4.35062e-10	-32.3246	-64.1849	7	2	92.7326	0	0	0	0.982354	1	9.58506e-14	2.23281e-11	FALSE	TRUE	FALSE
SAFB	1.65114e-05	0.000682987	-25.6957	-40.5711	7	2	29.5818	0	0	0	0.841859	1	1.83951e-06	8.57019e-05	FALSE	TRUE	FALSE
SCAF4	0.000340918	0.0088759	-10.8712	-22.36	7	2	3.37203	0	0	0	0.679984	1	5.90944e-05	0.00174368	FALSE	FALSE	FALSE
SEC63	0.000175115	0.00513284	-60.976	-73.2186	7	2	1743.85	0	0	0	0.0075665	0.86462	0.00207496	0.0321111	FALSE	FALSE	FALSE
SESN1	1.18196e-08	1.00603e-06	-13.8351	-36.554	7	2	7.98201	0	0	0	0.00763457	0.86462	8.71805e-08	5.75912e-06	FALSE	TRUE	FALSE
SLC12A2	6.5876e-05	0.00223894	-24.6074	-37.9468	7	2	19.9475	0	0	0	0.0666761	1	9.28374e-05	0.00256811	FALSE	FALSE	FALSE
SLC1A3	0.000103938	0.00326262	-10.3022	-23.1313	7	2	3.46558	0	0	0	0.187649	1	5.61754e-05	0.00166867	FALSE	FALSE	FALSE
SMARCA5	0.000314882	0.00829563	-63.2698	-74.8488	7	2	1958.88	0	0	0	0.599046	1	6.11999e-05	0.0017842	FALSE	FALSE	FALSE
SMARCE1	0.000265458	0.00720808	-66.6843	-78.4569	7	2	3327.89	0	0	0	0.157143	1	0.000182865	0.00437492	FALSE	FALSE	FALSE
SNRPA1	5.23224e-05	0.00186757	-29.8996	-43.4959	7	2	50.2926	0	0	0	0.983137	1	5.45357e-06	0.000221445	FALSE	TRUE	FALSE
SPPL2A	3.55566e-06	0.000180945	-28.1022	-44.6643	7	2	39.5689	0	0	0	0.304951	1	9.60042e-07	4.82858e-05	FALSE	TRUE	FALSE
SQSTM1	1.07524e-09	1.09547e-07	-52.4082	-77.6774	7	2	958.302	0	0	0	0.999967	1	6.13556e-11	7.54333e-09	FALSE	TRUE	FALSE
SRSF1	1.93888e-11	2.86049e-09	-26.6371	-56.1461	7	2	42.1694	0	0	0	0.892723	1	1.06526e-12	1.74624e-10	FALSE	TRUE	FALSE
SRSF11	1.26204e-07	9.15704e-06	-53.3287	-73.5099	7	2	782.38	0	0	0	0.0895885	1	9.37992e-08	6.10523e-06	FALSE	TRUE	FALSE
SRSF3	6.71823e-11	9.28833e-09	-61.9326	-90.1333	7	2	3471.28	0	0	0	0.953043	1	3.61603e-12	5.51881e-10	FALSE	TRUE	FALSE
SRSF5	4.90799e-06	0.000233578	-28.0956	-44.305	7	2	36.74	0	0	0	0.00583381	0.831168	6.12739e-05	0.0017842	FALSE	FALSE	FALSE
SYF2	3.53275e-07	2.2994e-05	-40.0147	-59.0859	7	2	189.567	0	0	0	0.956607	1	2.75353e-08	2.03119e-06	FALSE	TRUE	FALSE
TAF3	4.11987e-05	0.00151955	-29.7478	-43.6101	7	2	54.9156	0	0	0	0.44139	1	9.1368e-06	0.000345637	FALSE	TRUE	FALSE
THRA	6.90062e-12	1.27259e-09	-22.2325	-52.8271	7	2	22.7804	0	0	0	0.521223	1	6.2173e-13	1.14657e-10	FALSE	TRUE	FALSE
THUMPD2	0.000135413	0.00407713	-20.2815	-32.8136	7	2	12.1416	0	0	0	0.603739	1	2.43286e-05	0.000815744	FALSE	TRUE	FALSE
TKT	4.60233e-05	0.00168346	-30.9281	-44.6672	7	2	59.5013	0	0	0	0.986158	1	4.7367e-06	0.000194117	FALSE	TRUE	FALSE
TM4SF1	4.8316e-05	0.00175284	-28.1895	-41.8745	7	2	42.455	0	0	0	0.575696	1	8.39068e-06	0.000320148	FALSE	TRUE	FALSE
TNFAIP3	1.09935e-16	4.42337e-14	-31.802	-73.9097	7	2	91.6426	0	0	0	0.102425	1	3.63375e-17	1.46209e-14	FALSE	TRUE	FALSE
TNFRSF10B	2.70757e-15	9.98642e-13	-24.6248	-63.4083	7	2	36.9346	0	0	0	0.264315	1	3.79597e-16	1.40008e-13	FALSE	TRUE	FALSE
TNFRSF10D	1.90238e-11	2.86049e-09	-21.0718	-50.6008	7	2	19.7024	0	0	0	0.523356	1	1.766e-12	2.79154e-10	FALSE	TRUE	FALSE
TOP2A	4.95768e-05	0.00178396	-40.3782	-54.0345	7	2	175.545	0	0	0	0.0507292	1	8.90412e-05	0.00249428	FALSE	FALSE	FALSE
TPI1	4.4891e-06	0.000215965	-34.0739	-50.381	7	2	79.3238	0	0	0	0.17251	1	2.13411e-06	9.73771e-05	FALSE	TRUE	FALSE
TTF1	1.23718e-05	0.000526514	-35.4785	-50.6722	7	2	71.8866	0	0	0	0.186917	1	5.79341e-06	0.000233106	FALSE	TRUE	FALSE
TUBB4B	1.02879e-06	6.15329e-05	-32.273	-50.1863	7	2	74.037	0	0	0	0.140092	1	5.50537e-07	3.00824e-05	FALSE	TRUE	FALSE
TXNIP	3.07111e-18	1.94182e-15	-30.0234	-75.8325	7	2	85.7147	0	0	0	0.990346	1	9.93405e-20	6.28116e-17	FALSE	TRUE	FALSE
UFL1	5.31006e-06	0.000247393	-35.1417	-51.2648	7	2	99.1191	0	0	0	0.140524	1	3.10927e-06	0.000134918	FALSE	TRUE	FALSE
USP47	7.52507e-07	4.69098e-05	-30.9484	-49.201	7	2	61.7484	0	0	0	0.744716	1	7.8018e-08	5.39543e-06	FALSE	TRUE	FALSE
USP9X	4.34982e-06	0.000213914	-35.1627	-51.5043	7	2	112.753	0	0	0	0.837468	1	4.46238e-07	2.50006e-05	FALSE	TRUE	FALSE
VEZF1	2.47309e-07	1.68398e-05	-23.2025	-42.6588	7	2	20.3695	0	0	0	0.871716	1	2.0709e-08	1.55352e-06	FALSE	TRUE	FALSE
XPO6	2.64386e-05	0.0010448	-25.5765	-39.9312	7	2	24.9292	0	0	0	0.0909936	1	2.60161e-05	0.000859308	FALSE	TRUE	FALSE
ZBED5	2.31923e-07	1.60389e-05	-33.0777	-52.6033	7	2	62.7971	0	0	0	0.00915724	0.86462	1.62336e-06	7.80978e-05	FALSE	TRUE	FALSE
ZBTB10	5.19972e-06	0.000244829	-15.633	-31.7791	7	2	6.65709	0	0	0	0.520878	1	8.55096e-07	4.40076e-05	FALSE	TRUE	FALSE
ZC3H12A	2.5476e-05	0.00101583	-19.8674	-34.2632	7	2	10.9709	0	0	0	0.999972	1	2.4771e-06	0.000110744	FALSE	TRUE	FALSE
ZC3HAV1	3.50042e-21	3.09857e-18	-30.652	-83.4466	7	2	97.5227	0	0	0	0.742644	1	1.31043e-22	1.44999e-19	FALSE	TRUE	FALSE
ZFAND5	2.05279e-13	5.3445e-11	-28.5619	-62.8367	7	2	53.6682	0	0	0	0.98517	1	8.85516e-15	2.61286e-12	FALSE	TRUE	FALSE
ZFP36L1	4.11237e-08	3.25024e-06	-21.9056	-43.2909	7	2	19.1495	0	0	0	0.741736	1	3.6866e-09	3.19939e-07	FALSE	TRUE	FALSE
ZFY	2.34115e-06	0.000130902	-33.3036	-50.322	7	2	71.039	0	0	0	0.0640247	1	2.79771e-06	0.000122601	FALSE	TRUE	FALSE
ZMYND11	0.000155069	0.00460628	-32.3169	-44.6965	7	2	47.6012	0	0	0	0.141626	1	0.000113099	0.00303381	FALSE	FALSE	FALSE
ZNF451	9.25824e-10	9.99439e-08	-32.633	-58.0608	7	2	72.8126	0	0	0	0.604533	1	8.6031e-11	1.00203e-08	FALSE	TRUE	FALSE
ZNF644	2.49586e-12	5.02122e-10	-29.866	-61.5274	7	2	67.9955	0	0	0	0.000203616	0.225301	4.83922e-10	4.65617e-08	FALSE	TRUE	FALSE
ZNF711	5.82241e-08	4.52105e-06	-27.4242	-48.4366	7	2	32.4651	0	0	0	0.993364	1	3.98945e-09	3.39563e-07	FALSE	TRUE	FALSE
ZNF821	0.000178802	0.00516954	-21.9826	-34.2018	7	2	12.4545	0	0	0	0.781107	1	2.5659e-05	0.000853886	FALSE	TRUE	FALSE
ZNF827	1.12753e-05	0.00048926	-19.2959	-34.5918	7	2	11.1016	0	0	0	0.999944	1	1.03602e-06	5.15215e-05	FALSE	TRUE	FALSE
G	1.20074e-05	0.000515968	-70.6067	-85.8334	7	2	5087.46	0	0	0	0.255536	1	4.14904e-06	0.000174892	FALSE	TRUE	FALSE
L	1.52762e-14	4.82946e-12	-64.0573	-101.041	7	2	5070.3	0	0	0	0.00114305	0.389166	4.78213e-13	9.62078e-11	FALSE	TRUE	FALSE
M	2.4499e-10	3.01201e-08	-50.3271	-77.1622	7	2	686.885	0	0	0	0.0386685	1	3.20635e-10	3.3003e-08	FALSE	TRUE	FALSE
N	2.63017e-12	5.06136e-10	-70.7866	-102.393	7	2	11955.2	0	0	0	0.869275	1	1.38828e-13	3.07227e-11	FALSE	TRUE	FALSE
NS	2.42719e-06	0.000132626	-67.9069	-84.8859	7	2	3742.61	0	0	0	0.431151	1	4.57848e-07	2.53305e-05	FALSE	TRUE	FALSE

## Sheet: DEGs_time_glia
Gene	p	padj	loglik_full	loglik_red	df_full	df_red	mean	converge_impulse	converge_const	converge_sigmoid	impulseTOsigmoid_p	impulseTOsigmoid_padj	sigmoidTOconst_p	sigmoidTOconst_padj	isTransient	isMonotonous	allZero
ACAT1	1.49162e-05	0.000210564	-27.6072	-42.5948	7	2	45.5752	0	0	0	0.467943	1	2.91314e-06	4.12771e-05	FALSE	TRUE	FALSE
ACO1	6.03929e-07	1.04954e-05	-16.1343	-34.6253	7	2	4.84836	0	0	0	0.0196058	1	2.11494e-06	3.08541e-05	FALSE	TRUE	FALSE
ACSL3	6.18549e-47	7.49475e-45	-26.8254	-140.047	7	2	56.5426	0	0	0	0.442282	1	1.82997e-48	2.21731e-46	FALSE	TRUE	FALSE
ADRM1	0.000314108	0.00348636	-20.1704	-31.7522	7	2	17.9602	0	0	0	0.454743	1	7.94786e-05	0.00087107	FALSE	TRUE	FALSE
AFAP1	5.98342e-36	5.32647e-34	-12.6157	-100.16	7	2	11.0797	0	0	0	0.0355039	1	2.80046e-36	2.54492e-34	FALSE	TRUE	FALSE
AFG3L2	0.000212432	0.0024579	-21.8294	-33.854	7	2	19.7108	0	0	0	0.577982	1	4.13077e-05	0.000485672	FALSE	TRUE	FALSE
AGK	8.81005e-16	3.31288e-14	-30.7622	-70.7117	7	2	69.1087	0	0	0	1	1	3.22621e-17	1.26781e-15	FALSE	TRUE	FALSE
AGL	3.78377e-48	4.85435e-46	-21.5985	-137.651	7	2	25.9663	0	0	0	1	1	4.84862e-50	6.2205e-48	FALSE	TRUE	FALSE
AIMP2	6.60114e-08	1.25739e-06	-26.2043	-47.082	7	2	35.1136	0	0	0	0.152207	1	2.83968e-08	5.22644e-07	FALSE	TRUE	FALSE
AKIRIN2	1.28603e-05	0.000182725	-24.9115	-40.0625	7	2	22.9396	0	0	0	0.0809944	1	1.35229e-05	0.000172476	FALSE	TRUE	FALSE
AKR1C3	1.32546e-09	2.98024e-08	-19.734	-44.7812	7	2	21.995	0	0	0	0.936721	1	8.13255e-11	1.93848e-09	FALSE	TRUE	FALSE
ALDH3A1	5.34107e-12	1.58522e-10	-25.745	-56.6085	7	2	48.6518	0	0	0	0.789236	1	3.17241e-13	9.67695e-12	FALSE	TRUE	FALSE
ALDH3A2	5.79024e-06	8.80035e-05	-22.6156	-38.6438	7	2	21.2195	0	0	0	0.999999	1	5.09201e-07	8.10741e-06	FALSE	TRUE	FALSE
ALDH7A1	0.000451297	0.00470947	-23.3426	-34.5122	7	2	18.9627	0	0	0	0.988467	1	5.60654e-05	0.000636868	FALSE	TRUE	FALSE
ALG3	5.56032e-07	9.77988e-06	-17.967	-36.5475	7	2	16.5698	0	0	0	0.761125	1	5.55015e-08	1.0004e-06	FALSE	TRUE	FALSE
ALKBH7	2.28524e-06	3.66479e-05	-14.9457	-31.9904	7	2	11.0222	0	0	0	0.999974	1	1.89685e-07	3.23205e-06	FALSE	TRUE	FALSE
ANKRD17	0.000535924	0.00547471	-32.3973	-43.3708	7	2	52.1973	0	0	0	0.865315	1	7.6859e-05	0.000844481	FALSE	TRUE	FALSE
ANKRD28	0.000934275	0.00895672	-23.1162	-33.452	7	2	11.6637	0	0	0	0.223269	1	0.00051372	0.00468796	FALSE	FALSE	FALSE
AP2M1	4.98823e-06	7.63461e-05	-21.6987	-37.8903	7	2	19.448	0	0	0	0.893114	1	4.84913e-07	7.80512e-06	FALSE	TRUE	FALSE
ARID4B	5.53046e-13	1.77382e-11	-39.0552	-72.2942	7	2	180.195	0	0	0	0.234097	1	1.01237e-13	3.29549e-12	FALSE	TRUE	FALSE
ARNTL2	0.000228679	0.00261125	-18.9463	-30.8877	7	2	8.46665	0	0	0	0.496366	1	5.17804e-05	0.000594384	FALSE	TRUE	FALSE
ARRDC3	5.6438e-05	0.000717734	-13.8763	-27.3881	7	2	2.92255	0	0	0	0.758933	1	7.59557e-06	0.000100096	FALSE	TRUE	FALSE
ASAP1	0.000919035	0.00883002	-20.4636	-30.8184	7	2	8.59155	0	0	0	0.933152	1	0.000129223	0.00135173	FALSE	FALSE	FALSE
ASH1L	2.49266e-05	0.000339781	-15.0286	-29.4485	7	2	3.53208	0	0	0	0.309381	1	7.51749e-06	9.93675e-05	FALSE	TRUE	FALSE
ASMTL	5.44244e-13	1.75851e-11	-20.3402	-53.596	7	2	15.0552	0	0	0	0.478334	1	4.92618e-14	1.65292e-12	FALSE	TRUE	FALSE
ASPH	4.73706e-09	1.0129e-07	-22.4606	-46.1542	7	2	28.9795	0	0	0	0.527176	1	5.38272e-10	1.17397e-08	FALSE	TRUE	FALSE
ATF3	3.83315e-39	3.981e-37	-21.5944	-116.614	7	2	30.3046	0	0	0	0.450477	1	1.32368e-40	1.44347e-38	FALSE	TRUE	FALSE
ATP1B3	0.000414604	0.00438957	-20.2009	-31.4671	7	2	15.7877	0	0	0	0.693524	1	7.17732e-05	0.000794606	FALSE	TRUE	FALSE
ATP5F1A	2.43861e-17	9.84926e-16	-30.6703	-74.3371	7	2	115.831	0	0	0	0.86124	1	9.49048e-19	3.90542e-17	FALSE	TRUE	FALSE
ATP5F1C	1.12067e-09	2.58643e-08	-25.7249	-50.9502	7	2	41.601	0	0	0	0.185778	1	3.33526e-10	7.34768e-09	FALSE	TRUE	FALSE
ATP5F1E	2.26634e-09	4.99282e-08	-27.2057	-51.6834	7	2	66.0436	0	0	0	0.861521	1	1.54308e-10	3.54258e-09	FALSE	TRUE	FALSE
ATP5MC2	1.49485e-09	3.34386e-08	-21.3814	-46.301	7	2	28.0255	0	0	0	0.878586	1	9.81455e-11	2.31411e-09	FALSE	TRUE	FALSE
ATP6V0B	0.000442701	0.00464198	-24.2468	-35.4383	7	2	34.5881	0	0	0	1	1	5.4292e-05	0.000619952	FALSE	TRUE	FALSE
ATP6V0C	0.000122462	0.0014963	-21.6278	-34.2729	7	2	18.4391	0	0	0	1	1	1.34273e-05	0.000171759	FALSE	TRUE	FALSE
ATP6V1C1	5.76296e-05	0.000728639	-14.5729	-28.0615	7	2	4.06466	0	0	0	0.0017736	0.516044	0.00251491	0.0186248	FALSE	FALSE	FALSE
AVL9	5.15874e-07	9.11029e-06	-20.9888	-39.6504	7	2	10.8716	0	0	0	0.137055	1	2.71895e-07	4.49245e-06	FALSE	TRUE	FALSE
B2M	1.52282e-05	0.000213586	-40.9738	-55.9385	7	2	217.69	0	0	0	0.568006	1	2.46917e-06	3.57824e-05	FALSE	TRUE	FALSE
BAMBI	9.36953e-19	4.12827e-17	-31.1682	-78.2032	7	2	71.7606	0	0	0	0.566837	1	5.13e-20	2.33094e-18	FALSE	TRUE	FALSE
BCL10	0.000548326	0.00554942	-12.3749	-23.3222	7	2	2.10317	0	0	0	0.330961	1	0.00019745	0.00198909	FALSE	FALSE	FALSE
BEX3	2.79304e-05	0.000373719	-19.2421	-33.536	7	2	15.9269	0	0	0	0.935906	1	2.91457e-06	4.12771e-05	FALSE	TRUE	FALSE
BIRC3	5.76524e-29	4.19133e-27	-19.9348	-91.0915	7	2	15.8893	0	0	0	0.991748	1	1.20827e-30	8.78411e-29	FALSE	TRUE	FALSE
BNIP3	3.36455e-37	3.19047e-35	-28.2598	-118.732	7	2	64.2957	0	0	0	4.20034e-05	0.0261741	1.239e-34	1.0809e-32	FALSE	TRUE	FALSE
BRD4	0.000870788	0.00839448	-16.2414	-26.6583	7	2	4.01513	0	0	0	0.305981	1	0.000352605	0.0033326	FALSE	FALSE	FALSE
BSG	0.00017674	0.00208927	-21.671	-33.9032	7	2	20.4254	0	0	0	0.910314	1	2.18701e-05	0.00026797	FALSE	TRUE	FALSE
C19orf53	0.000135501	0.00162825	-15.6893	-28.2206	7	2	10.2678	0	0	0	0.443479	1	3.27475e-05	0.000391355	FALSE	TRUE	FALSE
C1S	1.26015e-05	0.000180222	-27.2198	-42.3933	7	2	44.5793	0	0	0	1	1	1.16655e-06	1.74862e-05	FALSE	TRUE	FALSE
C3	0.000213391	0.00246246	-9.56483	-21.5844	7	2	1.78606	0	0	0	0.549153	1	4.35991e-05	0.000511235	FALSE	TRUE	FALSE
C5orf15	2.15092e-18	9.19834e-17	-21.873	-68.05	7	2	19.5793	0	0	0	1	1	6.83736e-20	3.0747e-18	FALSE	TRUE	FALSE
CACYBP	1.14147e-08	2.35976e-07	-25.6344	-48.3905	7	2	47.662	0	0	0	0.911996	1	7.88072e-10	1.69338e-08	FALSE	TRUE	FALSE
CALD1	3.53107e-16	1.37523e-14	-28.8308	-69.7289	7	2	78.5059	0	0	0	2.91208e-08	0.000127025	3.32137e-10	7.34768e-09	TRUE	FALSE	FALSE
CALU	0.000174356	0.00206669	-17.8113	-30.0588	7	2	13.6545	0	0	0	0.935325	1	2.09959e-05	0.000257983	FALSE	TRUE	FALSE
CAP1	4.22604e-05	0.000547003	-17.4958	-31.3299	7	2	11.9077	0	0	0	0.968494	1	4.39787e-06	6.01364e-05	FALSE	TRUE	FALSE
CAV1	2.66211e-05	0.000358399	-22.456	-36.803	7	2	17.9705	0	0	0	0.0229289	1	9.82969e-05	0.00105609	FALSE	FALSE	FALSE
CBX3	9.30618e-07	1.59817e-05	-16.3521	-34.3743	7	2	14.0369	0	0	0	0.565119	1	1.27718e-07	2.21955e-06	FALSE	TRUE	FALSE
CCAR2	9.16099e-06	0.000135458	-17.6516	-33.1761	7	2	5.80874	0	0	0	0.130281	1	5.96503e-06	8.0307e-05	FALSE	TRUE	FALSE
CCDC174	8.53474e-12	2.4819e-10	-18.9354	-49.3069	7	2	8.77696	0	0	0	0.666219	1	6.0825e-13	1.79269e-11	FALSE	TRUE	FALSE
CCL5	5.88952e-236	6.42252e-233	-20.2532	-571.075	7	2	159.516	0	0	0	0.10644	1	1.50101e-237	1.63686e-234	FALSE	TRUE	FALSE
CCN1	2.80008e-08	5.60272e-07	-25.6511	-47.4481	7	2	21.4434	0	0	0	5.05735e-07	0.000735338	0.00219295	0.0165495	TRUE	FALSE	FALSE
CCN2	2.64216e-21	1.44064e-19	-19.4382	-72.5221	7	2	23.7677	0	0	0	0.971861	1	7.53685e-23	4.10947e-21	FALSE	TRUE	FALSE
CCND1	0.000108334	0.00133114	-14.8565	-27.6391	7	2	3.9619	0	0	0	0.0664318	1	0.000158609	0.00162407	FALSE	FALSE	FALSE
CCNL1	5.2769e-29	3.90132e-27	-19.7313	-90.9785	7	2	14.7352	0	0	0	1	1	1.09549e-30	8.09918e-29	FALSE	TRUE	FALSE
CCPG1	1.90531e-23	1.09355e-21	-28.201	-86.3514	7	2	47.983	0	0	0	0.471644	1	1.01776e-24	5.9193e-23	FALSE	TRUE	FALSE
CCT5	1.70599e-06	2.79757e-05	-24.8089	-42.1723	7	2	38.6185	0	0	0	0.263103	1	5.09269e-07	8.10741e-06	FALSE	TRUE	FALSE
CD2BP2	3.37442e-05	0.000440695	-12.8273	-26.9114	7	2	7.57959	0	0	0	0.0755851	1	4.03211e-05	0.000475353	FALSE	TRUE	FALSE
CD63	1.27061e-07	2.35846e-06	-26.1735	-46.3473	7	2	35.7053	0	0	0	1	1	8.99142e-09	1.74314e-07	FALSE	TRUE	FALSE
CDC14A	9.50152e-56	1.42916e-53	-11.5426	-145.307	7	2	16.1359	0	0	0	0.00489774	1	2.11621e-55	3.18307e-53	FALSE	TRUE	FALSE
CERT1	2.86271e-29	2.15295e-27	-22.7732	-94.6448	7	2	27.8388	0	0	0	0.586787	1	1.00045e-30	7.52404e-29	FALSE	TRUE	FALSE
CHD2	1.57039e-08	3.18607e-07	-20.8427	-43.2581	7	2	10.632	0	0	0	0.715351	1	1.39495e-09	2.8975e-08	FALSE	TRUE	FALSE
CHEK2	4.0513e-18	1.66715e-16	-12.3628	-57.8857	7	2	5.30304	0	0	0	0.392052	1	3.2973e-19	1.38297e-17	FALSE	TRUE	FALSE
CHID1	0.000445648	0.00466167	-17.5656	-28.7496	7	2	10.7564	0	0	0	0.178442	1	0.000283892	0.00275798	FALSE	FALSE	FALSE
CIART	0.000411485	0.00436715	-6.15107	-17.4259	7	2	1.32398	0	0	0	1	1	5.01232e-05	0.000578406	FALSE	TRUE	FALSE
CITED2	0.000386119	0.00414841	-15.8946	-27.2418	7	2	4.49844	0	0	0	0.00706805	1	0.00511321	0.0337936	FALSE	FALSE	FALSE
CLASP1	2.06785e-15	7.64402e-14	-21.3608	-60.4243	7	2	15.931	0	0	0	1	1	7.73974e-17	3.01435e-15	FALSE	TRUE	FALSE
CLK1	9.30921e-05	0.00116686	-23.0451	-35.9977	7	2	11.8942	0	0	0	0.56427	1	1.73247e-05	0.000216534	FALSE	TRUE	FALSE
CLK4	1.8313e-05	0.000255212	-17.5613	-32.3223	7	2	5.42614	0	0	0	0.982718	1	1.76908e-06	2.59822e-05	FALSE	TRUE	FALSE
COL1A2	2.76768e-10	6.78238e-09	-31.9905	-58.6966	7	2	96.2805	0	0	0	0.703417	1	2.11526e-11	5.3334e-10	FALSE	TRUE	FALSE
COL8A1	1.96583e-07	3.58784e-06	-20.1268	-39.8306	7	2	10.7814	0	0	0	0.702138	1	2.00874e-08	3.77677e-07	FALSE	TRUE	FALSE
COPS2	1.41387e-30	1.12133e-28	-26.1935	-101.135	7	2	46.0652	0	0	0	0.952959	1	2.92936e-32	2.36627e-30	FALSE	TRUE	FALSE
COPS5	1.36742e-06	2.30297e-05	-26.6549	-44.2589	7	2	22.4387	0	0	0	1	1	1.10097e-07	1.93646e-06	FALSE	TRUE	FALSE
COX19	3.12635e-13	1.03312e-11	-14.2825	-48.1178	7	2	4.76772	0	0	0	0.0368815	1	3.47139e-13	1.05154e-11	FALSE	TRUE	FALSE
CPEB2	5.28306e-27	3.49162e-25	-15.8591	-82.3988	7	2	8.87983	0	0	0	1	1	1.17319e-28	7.75375e-27	FALSE	TRUE	FALSE
CRBN	1.52373e-23	8.86202e-22	-23.0759	-81.4556	7	2	21.8447	0	0	0	0.12699	1	2.97747e-24	1.70891e-22	FALSE	TRUE	FALSE
CREB5	1.60789e-22	9.10858e-21	-12.838	-68.7989	7	2	7.44137	0	0	0	0.704874	1	5.98762e-24	3.39195e-22	FALSE	TRUE	FALSE
CTSA	0.000595709	0.00597352	-19.2266	-30.0791	7	2	12.6273	0	0	0	0.623462	1	0.000118074	0.00124106	FALSE	FALSE	FALSE
CUTA	2.60335e-11	7.00976e-10	-22.6341	-51.8332	7	2	29.8422	0	0	0	1	1	1.2924e-12	3.6846e-11	FALSE	TRUE	FALSE
CWC22	5.43461e-09	1.15077e-07	-27.5383	-51.0856	7	2	31.5417	0	0	0	0.931357	1	3.55759e-10	7.79809e-09	FALSE	TRUE	FALSE
CWC25	1.8898e-05	0.000261692	-21.4543	-36.1805	7	2	11.1455	0	0	0	0.884733	1	2.02542e-06	2.96473e-05	FALSE	TRUE	FALSE
CXCL10	2.26833e-63	4.12269e-61	-20.7807	-172.281	7	2	48.3929	0	0	0	0.997803	1	2.23599e-65	4.24061e-63	FALSE	TRUE	FALSE
CXCL11	5.31892e-10	1.25412e-08	-8.33417	-34.3492	7	2	2.71283	0	0	0	0.821669	1	3.57878e-11	8.86969e-10	FALSE	TRUE	FALSE
CXCL12	3.12297e-11	8.20627e-10	-26.3884	-55.3959	7	2	51.5057	0	0	0	0.978118	1	1.59456e-12	4.45862e-11	FALSE	TRUE	FALSE
CYLD	1.40998e-06	2.36551e-05	-16.7072	-34.2779	7	2	5.40592	0	0	0	0.993348	1	1.14467e-07	2.00525e-06	FALSE	TRUE	FALSE
DCUN1D1	1.67259e-06	2.75314e-05	-10.0662	-27.451	7	2	2.31873	0	0	0	0.169747	1	7.63011e-07	1.18866e-05	FALSE	TRUE	FALSE
DDX39A	0.000100089	0.00125097	-20.1342	-33.0057	7	2	11.9031	0	0	0	0.836967	1	1.28158e-05	0.000164419	FALSE	TRUE	FALSE
DDX39B	4.00311e-09	8.60176e-08	-23.2273	-47.1001	7	2	24.0627	0	0	0	1	1	2.41224e-10	5.42381e-09	FALSE	TRUE	FALSE
DDX3X	2.11846e-19	9.93627e-18	-34.2269	-82.7958	7	2	109.181	0	0	0	0.999985	1	6.40946e-21	3.07231e-19	FALSE	TRUE	FALSE
DDX58	1.1998e-147	5.23352e-145	-41.1935	-387.984	7	2	1540.97	0	0	0	1	1	5.17464e-150	2.25718e-147	FALSE	TRUE	FALSE
DHX36	0.000367329	0.00396606	-18.0422	-29.4461	7	2	6.69875	0	0	0	0.983609	1	4.49895e-05	0.000521926	FALSE	TRUE	FALSE
DHX58	4.79724e-10	1.14347e-08	-9.98112	-36.1054	7	2	2.88217	0	0	0	0.462334	1	5.6521e-11	1.39291e-09	FALSE	TRUE	FALSE
DIAPH1	4.75658e-11	1.22048e-09	-26.0698	-54.6343	7	2	28.232	0	0	0	0.56776	1	4.20732e-12	1.11905e-10	FALSE	TRUE	FALSE
DICER1	0.000979093	0.00936579	-8.39067	-18.6725	7	2	1.18555	0	0	0	0.958698	1	0.000135019	0.00140898	FALSE	FALSE	FALSE
DNAJB4	4.56087e-40	5.10116e-38	-25.7964	-122.978	7	2	42.0664	0	0	0	0.00865508	1	7.85323e-40	7.7854e-38	FALSE	TRUE	FALSE
DSTN	7.91286e-15	2.80617e-13	-23.0718	-60.7402	7	2	44.8817	0	0	0	0.00194945	0.531469	1.44139e-13	4.55604e-12	FALSE	TRUE	FALSE
DUSP11	5.73917e-07	1.00539e-05	-23.3452	-41.8914	7	2	19.2218	0	0	0	1	1	4.39868e-08	7.99459e-07	FALSE	TRUE	FALSE
DUSP4	0.000352787	0.00385678	-15.1032	-26.5531	7	2	4.20495	0	0	0	0.000413601	0.180413	0.0624084	0.232329	FALSE	FALSE	FALSE
EBPL	1.35974e-26	8.72232e-25	-41.9652	-107.538	7	2	417.213	0	0	0	0.794496	1	3.84909e-28	2.46908e-26	FALSE	TRUE	FALSE
ECH1	0.000474816	0.0049313	-19.2853	-30.3969	7	2	13.8824	0	0	0	1	1	5.8612e-05	0.000664066	FALSE	TRUE	FALSE
EEF1A1	3.65113e-18	1.53137e-16	-52.2316	-97.862	7	2	1417.36	0	0	0	0.557402	1	2.09335e-19	8.86525e-18	FALSE	TRUE	FALSE
EEF1G	0.000315748	0.00349566	-32.4666	-44.0424	7	2	76.7642	0	0	0	0.9717	1	3.85957e-05	0.000456245	FALSE	TRUE	FALSE
EGR1	1.55492e-104	3.98975e-102	-36.6015	-283.614	7	2	671.999	0	0	0	1	1	9.40422e-107	2.41301e-104	FALSE	TRUE	FALSE
EID1	3.52002e-06	5.46417e-05	-19.3059	-35.879	7	2	17.036	0	0	0	0.935666	1	3.20005e-07	5.20844e-06	FALSE	TRUE	FALSE
EIF1	0.000290891	0.00326187	-41.553	-53.2218	7	2	192.303	0	0	0	0.923659	1	3.70592e-05	0.000439273	FALSE	TRUE	FALSE
EIF3K	2.51537e-09	5.5136e-08	-23.4222	-47.7891	7	2	38.5606	0	0	0	0.0572877	1	2.44365e-09	4.95777e-08	FALSE	TRUE	FALSE
EIF4A1	6.06253e-06	9.1822e-05	-21.4117	-37.3895	7	2	26.528	0	0	0	0.162385	1	3.11135e-06	4.36389e-05	FALSE	TRUE	FALSE
EIF4G2	0.000207119	0.0024028	-28.868	-40.9212	7	2	24.0103	0	0	0	0.0368409	1	0.000556537	0.00502605	FALSE	FALSE	FALSE
EIF5B	0.000403975	0.0042979	-24.4068	-35.7025	7	2	42.1479	0	0	0	0.229457	1	0.000200826	0.0020138	FALSE	FALSE	FALSE
ENO1	1.41321e-05	0.000200143	-29.5627	-44.6098	7	2	48.4003	0	0	0	0.364584	1	3.5007e-06	4.86307e-05	FALSE	TRUE	FALSE
EPHA4	5.87644e-16	2.26841e-14	-21.8028	-62.1725	7	2	21.7329	0	0	0	0.26674	1	7.85702e-17	3.03295e-15	FALSE	TRUE	FALSE
EPHX1	1.8452e-09	4.10651e-08	-27.5432	-52.2393	7	2	47.5794	0	0	0	1	1	1.07633e-10	2.52416e-09	FALSE	TRUE	FALSE
EXT1	8.71983e-06	0.000129374	-19.9514	-35.5302	7	2	8.60733	0	0	0	1	1	7.87551e-07	1.22253e-05	FALSE	TRUE	FALSE
EXTL2	0.000561677	0.00565828	-33.1984	-44.1182	7	2	76.567	0	0	0	0.0151776	1	0.00373402	0.0259774	FALSE	FALSE	FALSE
FAM200A	5.53633e-26	3.44993e-24	-21.6849	-85.8209	7	2	18.7387	0	0	0	0.908502	1	1.40215e-27	8.73742e-26	FALSE	TRUE	FALSE
FASTK	3.36036e-05	0.000440177	-17.2864	-31.3751	7	2	12.8462	0	0	0	1	1	3.33349e-06	4.64559e-05	FALSE	TRUE	FALSE
FBL	0.000542581	0.00552349	-21.7023	-32.6616	7	2	19.0283	0	0	0	0.944386	1	7.1646e-05	0.000794606	FALSE	TRUE	FALSE
FIS1	0.000544498	0.00552349	-16.5682	-27.5235	7	2	9.52954	0	0	0	0.3872	1	0.000168698	0.00172333	FALSE	FALSE	FALSE
FLOT1	1.51998e-05	0.000213586	-24.3563	-39.323	7	2	31.7523	0	0	0	0.987827	1	1.44224e-06	2.14712e-05	FALSE	TRUE	FALSE
FMR1	3.99646e-06	6.15992e-05	-21.9335	-38.3678	7	2	15.3559	0	0	0	0.39432	1	8.47007e-07	1.31016e-05	FALSE	TRUE	FALSE
FNDC3A	2.2945e-36	2.12949e-34	-18.9485	-107.468	7	2	30.2698	0	0	0	0.906533	1	4.2385e-38	4.0192e-36	FALSE	TRUE	FALSE
FTSJ3	2.3609e-06	3.74481e-05	-20.813	-37.8222	7	2	19.2234	0	0	0	0.153076	1	1.21388e-06	1.81334e-05	FALSE	TRUE	FALSE
FYN	1.57573e-19	7.47103e-18	-11.3652	-60.2393	7	2	5.06668	0	0	0	0.540161	1	8.71746e-21	4.13321e-19	FALSE	TRUE	FALSE
G6PD	7.47946e-08	1.41236e-06	-21.9969	-42.7405	7	2	30.2932	0	0	0	0.930669	1	5.52924e-09	1.09134e-07	FALSE	TRUE	FALSE
GABARAP	1.03821e-09	2.40887e-08	-24.1799	-49.4863	7	2	43.7484	0	0	0	0.977813	1	6.04737e-11	1.48195e-09	FALSE	TRUE	FALSE
GABARAPL2	3.04177e-05	0.000402067	-29.4144	-43.6136	7	2	60.3346	0	0	0	0.704366	1	4.20348e-06	5.78409e-05	FALSE	TRUE	FALSE
GCA	2.81017e-12	8.57926e-11	-15.6532	-47.1903	7	2	6.36976	0	0	0	0.999999	1	1.29492e-13	4.12656e-12	FALSE	TRUE	FALSE
GET4	2.57517e-05	0.000348848	-17.376	-31.7599	7	2	5.20845	0	0	0	0.265433	1	9.0233e-06	0.000117491	FALSE	TRUE	FALSE
GIGYF2	9.22263e-08	1.72657e-06	-20.8666	-41.3851	7	2	11.3871	0	0	0	1	1	6.42207e-09	1.25619e-07	FALSE	TRUE	FALSE
GLRX	1.60532e-05	0.000224436	-13.3271	-28.2336	7	2	9.1567	0	0	0	1	1	1.51088e-06	2.23406e-05	FALSE	TRUE	FALSE
GMFB	1.04709e-05	0.000152757	-18.4529	-33.8303	7	2	7.14816	0	0	0	1	1	9.57289e-07	1.46516e-05	FALSE	TRUE	FALSE
GNG11	1.12196e-05	0.00016259	-21.1258	-36.4272	7	2	23.0848	0	0	0	0.940211	1	1.09395e-06	1.64545e-05	FALSE	TRUE	FALSE
GOLGA4	5.17211e-09	1.10052e-07	-33.2917	-56.8917	7	2	127.409	0	0	0	0.220225	1	1.38614e-09	2.89299e-08	FALSE	TRUE	FALSE
GPAA1	0.000195067	0.00227508	-23.6911	-35.812	7	2	31.2631	0	0	0	0.259367	1	8.11969e-05	0.000885452	FALSE	TRUE	FALSE
GPBP1	1.80696e-35	1.57639e-33	-30.4973	-116.918	7	2	80.717	0	0	0	0.294553	1	1.04515e-36	9.69989e-35	FALSE	TRUE	FALSE
GRN	2.95766e-07	5.28743e-06	-22.3326	-41.5957	7	2	31.8644	0	0	0	0.933195	1	2.33938e-08	4.34229e-07	FALSE	TRUE	FALSE
GSK3B	1.56339e-39	1.6633e-37	-22.295	-118.225	7	2	26.9031	0	0	0	0.656556	1	3.67672e-41	4.11227e-39	FALSE	TRUE	FALSE
GSTP1	1.71665e-11	4.86234e-10	-26.9897	-56.6268	7	2	50.9289	0	0	0	0.0533123	1	1.49836e-11	3.82213e-10	FALSE	TRUE	FALSE
H2AZ2	4.87038e-05	0.000626684	-20.4151	-34.0912	7	2	19.0165	0	0	0	0.999998	1	4.96668e-06	6.74911e-05	FALSE	TRUE	FALSE
HARS1	0.000126709	0.00153957	-23.3925	-35.9992	7	2	10.6722	0	0	0	0.999757	1	1.39352e-05	0.000176701	FALSE	TRUE	FALSE
HDAC2	0.000478922	0.00496213	-23.6503	-34.7521	7	2	28.2065	0	0	0	0.585955	1	9.87123e-05	0.00105794	FALSE	FALSE	FALSE
HDLBP	0.000285501	0.00320968	-21.5162	-33.2063	7	2	18.4477	0	0	0	1	1	3.36459e-05	0.000400993	FALSE	TRUE	FALSE
HERC5	2.05801e-145	6.41217e-143	-18.2597	-359.883	7	2	65.332	0	0	0	0.584947	1	1.53909e-147	5.16423e-145	FALSE	TRUE	FALSE
HERC6	4.82854e-18	1.96842e-16	-15.5414	-60.8829	7	2	8.06606	0	0	0	0.999999	1	1.56256e-19	6.68224e-18	FALSE	TRUE	FALSE
HINT1	0.00083314	0.00812896	-25.9497	-36.4174	7	2	47.1552	0	0	0	0.999998	1	0.000108579	0.00114956	FALSE	FALSE	FALSE
HLA-F	1.51947e-06	2.52013e-05	-17.0856	-34.575	7	2	5.5043	0	0	0	0.520455	1	2.32295e-07	3.91224e-06	FALSE	TRUE	FALSE
HSCB	1.72515e-55	2.50836e-53	-24.2105	-157.371	7	2	46.3177	0	0	0	0.00104872	0.38121	1.79152e-54	2.60487e-52	FALSE	TRUE	FALSE
HSP90AB1	3.94332e-10	9.45097e-09	-26.1931	-52.5248	7	2	41.227	0	0	0	0.264064	1	7.98803e-11	1.91449e-09	FALSE	TRUE	FALSE
HSP90B1	1.07571e-06	1.82577e-05	-23.8155	-41.6804	7	2	28.5583	0	0	0	1	1	8.54157e-08	1.51457e-06	FALSE	TRUE	FALSE
HSPA5	1.30128e-28	9.30519e-27	-35.7494	-106.075	7	2	198.554	0	0	0	0.999996	1	2.73638e-30	1.95673e-28	FALSE	TRUE	FALSE
HSPA8	1.68645e-20	8.65444e-19	-41.0052	-92.1817	7	2	286.717	0	0	0	2.48013e-07	0.000540915	1.64507e-15	5.88181e-14	TRUE	FALSE	FALSE
HSPB1	3.63313e-05	0.000471658	-26.9136	-40.9157	7	2	38.9986	0	0	0	0.228001	1	1.50928e-05	0.000190825	FALSE	TRUE	FALSE
HSPD1	2.40297e-14	8.31885e-13	-24.2094	-60.7214	7	2	41.2338	0	0	0	0.445196	1	2.13416e-15	7.56846e-14	FALSE	TRUE	FALSE
IARS2	0.000220979	0.0025366	-23.8726	-35.8527	7	2	20.1691	0	0	0	0.839576	1	3.01236e-05	0.000361981	FALSE	TRUE	FALSE
ID1	0.000713062	0.00708514	-14.7806	-25.4271	7	2	6.50441	0	0	0	0.999748	1	9.15352e-05	0.00099076	FALSE	TRUE	FALSE
ID3	4.6402e-21	2.46836e-19	-19.0627	-71.5674	7	2	32.4108	0	0	0	0.319989	1	4.02117e-22	2.08813e-20	FALSE	TRUE	FALSE
IER2	1.0788e-32	9.04947e-31	-20.9274	-100.84	7	2	26.6263	0	0	0	0.979364	1	2.04167e-34	1.74622e-32	FALSE	TRUE	FALSE
IFI44	1.8818e-29	1.46579e-27	-22.4762	-94.7762	7	2	27.043	0	0	0	0.646917	1	5.93443e-31	4.5414e-29	FALSE	TRUE	FALSE
IFI6	6.46986e-13	2.05997e-11	-19.7113	-52.7863	7	2	11.9445	0	0	0	0.113199	1	2.43315e-13	7.47423e-12	FALSE	TRUE	FALSE
IFIH1	7.50497e-146	2.51821e-143	-24.0075	-366.644	7	2	168.459	0	0	0	0.061989	1	5.26332e-147	1.6399e-144	FALSE	TRUE	FALSE
IFIT1	1.86804e-62	3.25935e-60	-22.7064	-172.077	7	2	48.9266	0	0	0	0.0160613	1	1.14413e-62	2.07945e-60	FALSE	TRUE	FALSE
IFIT2	5.15275e-146	1.87302e-143	-46.076	-389.09	7	2	4539.79	0	0	0	0.978128	1	2.2969e-148	8.34924e-146	FALSE	TRUE	FALSE
IFIT3	3.13787e-155	1.52082e-152	-28.3954	-392.719	7	2	247.67	0	0	0	0.0628867	1	2.04097e-156	9.8919e-154	FALSE	TRUE	FALSE
IFIT5	1.3711e-30	1.10754e-28	-14.2345	-89.2074	7	2	9.79432	0	0	0	0.371843	1	7.232e-32	5.73563e-30	FALSE	TRUE	FALSE
IFNB1	1.89946e-138	5.52363e-136	-16.3071	-341.82	7	2	57.9007	0	0	0	0.514994	1	1.69268e-140	4.92231e-138	FALSE	TRUE	FALSE
IFNL1	2.08756e-29	1.59754e-27	-10.9566	-83.1506	7	2	8.92645	0	0	0	0.999916	1	4.27811e-31	3.33234e-29	FALSE	TRUE	FALSE
IFRD1	5.7228e-06	8.72827e-05	-22.5759	-38.617	7	2	18.4084	0	0	0	1	1	5.02892e-07	8.06476e-06	FALSE	TRUE	FALSE
IGFBP5	7.20781e-08	1.36698e-06	-36.6387	-57.422	7	2	108.74	0	0	0	0.773824	1	6.36951e-09	1.25152e-07	FALSE	TRUE	FALSE
IL1R1	7.63109e-19	3.39661e-17	-14.7624	-62.0092	7	2	11.747	0	0	0	0.336777	1	6.96336e-20	3.09941e-18	FALSE	TRUE	FALSE
IL6	9.6479e-19	4.20842e-17	-15.8924	-62.8972	7	2	6.98162	0	0	0	0.999999	1	3.01402e-20	1.38391e-18	FALSE	TRUE	FALSE
IRF1	3.95847e-52	5.56995e-50	-20.1289	-145.461	7	2	41.8104	0	0	0	0.149484	1	3.12036e-53	4.25344e-51	FALSE	TRUE	FALSE
ISG15	1.55494e-11	4.43311e-10	-25.5674	-55.3085	7	2	28.9709	0	0	0	0.999997	1	7.58335e-13	2.22004e-11	FALSE	TRUE	FALSE
ITGA1	2.30837e-11	6.29319e-10	-18.3929	-47.7185	7	2	7.96436	0	0	0	0.279453	1	3.99682e-12	1.06958e-10	FALSE	TRUE	FALSE
ITGA6	0.00065927	0.00658063	-14.6679	-25.4043	7	2	7.49347	0	0	0	1	1	8.39632e-05	0.000913336	FALSE	TRUE	FALSE
JAZF1	5.20388e-36	4.72903e-34	-19.4655	-107.152	7	2	19.4958	0	0	0	0.0209874	1	4.1011e-36	3.65082e-34	FALSE	TRUE	FALSE
JUN	2.46216e-104	5.96663e-102	-23.5422	-270.093	7	2	67.7211	0	0	0	0.600448	1	2.48208e-106	6.01492e-104	FALSE	TRUE	FALSE
KDELR1	0.000222791	0.00255069	-15.9065	-27.8773	7	2	9.98101	0	0	0	0.567044	1	4.43015e-05	0.000516692	FALSE	TRUE	FALSE
KDELR2	3.45266e-06	5.37875e-05	-20.9028	-37.497	7	2	19.6303	0	0	0	0.984785	1	2.98305e-07	4.89176e-06	FALSE	TRUE	FALSE
KDM6A	4.97266e-10	1.17884e-08	-11.4122	-37.4985	7	2	4.31751	0	0	0	1	1	2.75173e-11	6.85889e-10	FALSE	TRUE	FALSE
KIAA1586	1.75439e-07	3.22896e-06	-26.7363	-46.5628	7	2	27.9218	0	0	0	1	1	1.26215e-08	2.41877e-07	FALSE	TRUE	FALSE
KLF4	1.02207e-107	2.78641e-105	-16.8967	-271.281	7	2	41.4191	0	0	0	1	1	6.00307e-110	1.63659e-107	FALSE	TRUE	FALSE
KLF6	3.87375e-10	9.33551e-09	-18.8861	-45.2366	7	2	8.51188	0	0	0	0.0705615	1	2.85922e-10	6.39585e-09	FALSE	TRUE	FALSE
KMT2C	1.13513e-12	3.58799e-11	-17.761	-50.2476	7	2	7.87391	0	0	0	0.804493	1	6.29702e-14	2.08088e-12	FALSE	TRUE	FALSE
KMT2E	3.25268e-20	1.64979e-18	-21.9825	-72.4825	7	2	17.0327	0	0	0	0.996621	1	9.50386e-22	4.87716e-20	FALSE	TRUE	FALSE
KTN1	0.000527225	0.00541119	-28.8846	-39.8767	7	2	40.872	0	0	0	0.0683258	1	0.000847078	0.00717467	FALSE	FALSE	FALSE
KYNU	0.000295035	0.00329985	-33.1837	-44.8366	7	2	95.7732	0	0	0	0.97696	1	3.56606e-05	0.000423846	FALSE	TRUE	FALSE
L3MBTL4	5.24631e-13	1.70779e-11	-27.2081	-60.5023	7	2	34.7577	0	0	0	1	1	2.29373e-14	7.75602e-13	FALSE	TRUE	FALSE
LAMB1	2.89611e-05	0.000386325	-41.8396	-56.0933	7	2	183.261	0	0	0	1	1	2.84201e-06	4.07791e-05	FALSE	TRUE	FALSE
LAMTOR2	3.44173e-05	0.000448144	-16.8427	-30.9049	7	2	13.3283	0	0	0	0.776284	1	4.3686e-06	5.9924e-05	FALSE	TRUE	FALSE
LDLRAD3	0.000101212	0.0012572	-25.6668	-38.5257	7	2	19.4463	0	0	0	0.884427	1	1.22998e-05	0.000158733	FALSE	TRUE	FALSE
LGALS1	6.61908e-07	1.14573e-05	-24.7192	-43.111	7	2	45.7884	0	0	0	0.843223	1	6.03735e-08	1.0793e-06	FALSE	TRUE	FALSE
LGALS3BP	0.000862527	0.00836077	-20.1808	-30.6086	7	2	15.1817	0	0	0	0.766084	1	0.000145507	0.0015076	FALSE	FALSE	FALSE
LIG4	1.12201e-08	2.34174e-07	-19.4441	-42.2185	7	2	9.20662	0	0	0	1	1	7.07299e-10	1.52734e-08	FALSE	TRUE	FALSE
LIMA1	0.000129514	0.00156493	-21.2276	-33.8097	7	2	15.2508	0	0	0	0.180294	1	7.39538e-05	0.000816674	FALSE	TRUE	FALSE
LIPA	0.000871779	0.00839448	-16.4504	-26.866	7	2	4.25711	0	0	0	0.447148	1	0.000246042	0.0024172	FALSE	FALSE	FALSE
LRRN3	4.03996e-39	4.09821e-37	-15.3539	-110.32	7	2	13.6407	0	0	0	0.434113	1	1.4482e-40	1.54075e-38	FALSE	TRUE	FALSE
LTO1	0.000364501	0.0039453	-18.5635	-29.9763	7	2	10.7058	0	0	0	0.426362	1	9.9377e-05	0.00106246	FALSE	FALSE	FALSE
LUC7L2	1.29602e-09	2.92915e-08	-13.9783	-39.0493	7	2	5.56632	0	0	0	1.34723e-05	0.0117532	4.17358e-06	5.76112e-05	FALSE	TRUE	FALSE
MAFF	4.96455e-05	0.000636922	-14.0085	-27.6633	7	2	3.7606	0	0	0	0.000508449	0.201623	0.00691458	0.0433353	FALSE	FALSE	FALSE
MAP4K4	1.13216e-47	1.411e-45	-35.1691	-150.111	7	2	199.1	0	0	0	0.516949	1	2.82523e-49	3.52105e-47	FALSE	TRUE	FALSE
MARCHF5	5.0438e-42	5.78975e-40	-22.9484	-124.703	7	2	29.9846	0	0	0	0.99778	1	7.37886e-44	8.47015e-42	FALSE	TRUE	FALSE
MCL1	3.63767e-13	1.19305e-11	-16.5963	-50.2733	7	2	5.83382	0	0	0	0.869761	1	1.80476e-14	6.15027e-13	FALSE	TRUE	FALSE
MED13L	7.89153e-15	2.80617e-13	-13.0971	-50.7683	7	2	4.60316	0	0	0	0.232651	1	1.29023e-15	4.68999e-14	FALSE	TRUE	FALSE
MFF	0.000198201	0.00230547	-14.2452	-26.3481	7	2	8.15662	0	0	0	1	1	2.26241e-05	0.000276432	FALSE	TRUE	FALSE
MFSD14A	1.87846e-05	0.00026095	-9.86716	-24.6001	7	2	2.75327	0	0	0	0.148117	1	1.131e-05	0.000146829	FALSE	TRUE	FALSE
MGP	0.000332552	0.00365388	-27.6665	-39.1835	7	2	30.3705	0	0	0	0.878689	1	4.49796e-05	0.000521926	FALSE	TRUE	FALSE
MGST1	1.36097e-16	5.34826e-15	-31.8649	-73.7514	7	2	126.557	0	0	0	0.00748965	1	5.98028e-16	2.21068e-14	FALSE	TRUE	FALSE
MIER1	1.2715e-05	0.000181252	-30.6338	-45.7974	7	2	38.0867	0	0	0	0.344523	1	3.30375e-06	4.6189e-05	FALSE	TRUE	FALSE
MIF	1.74197e-10	4.29291e-09	-29.9165	-57.1118	7	2	80.5482	0	0	0	0.0484826	1	1.80478e-10	4.10024e-09	FALSE	TRUE	FALSE
MLF2	0.000457408	0.00476185	-21.0872	-32.2415	7	2	19.8341	0	0	0	0.438885	1	0.00012377	0.0012978	FALSE	FALSE	FALSE
MOSPD1	5.54332e-28	3.9e-26	-24.598	-93.4426	7	2	29.8976	0	0	0	0.16991	1	6.91646e-29	4.64148e-27	FALSE	TRUE	FALSE
MRNIP	0.000861698	0.00836077	-16.4407	-26.8697	7	2	9.8804	0	0	0	0.206171	1	0.000507222	0.00463837	FALSE	FALSE	FALSE
MRPL15	7.10592e-05	0.000893257	-27.1717	-40.4264	7	2	27.1802	0	0	0	0.39251	1	1.83694e-05	0.000228283	FALSE	TRUE	FALSE
MRPS34	6.98138e-07	1.20367e-05	-16.6442	-34.9781	7	2	14.6384	0	0	0	0.565327	1	9.42615e-08	1.66465e-06	FALSE	TRUE	FALSE
MRPS6	1.02696e-08	2.15365e-07	-23.5003	-46.3692	7	2	31.6582	0	0	0	1	1	6.44819e-10	1.39935e-08	FALSE	TRUE	FALSE
MRRF	0.000643107	0.00643402	-13.6895	-24.4544	7	2	2.63325	0	0	0	0.796874	1	0.000101541	0.0010803	FALSE	FALSE	FALSE
MSC	0.000780844	0.00765403	-12.6708	-23.213	7	2	5.63763	0	0	0	0.999973	1	0.000101113	0.00107838	FALSE	FALSE	FALSE
MT-ND2	2.59601e-09	5.6619e-08	-36.3198	-60.6531	7	2	309.225	0	0	0	2.06477e-05	0.0150108	5.63455e-06	7.60926e-05	FALSE	TRUE	FALSE
MT-ND4	1.18182e-12	3.7087e-11	-36.0292	-68.4736	7	2	125.853	0	0	0	0.350065	1	1.48954e-13	4.67436e-12	FALSE	TRUE	FALSE
MX1	3.82653e-08	7.55263e-07	-15.8735	-37.3361	7	2	6.32899	0	0	0	0.715088	1	3.54313e-09	7.0895e-08	FALSE	TRUE	FALSE
MXD1	1.75161e-18	7.56487e-17	-10.8523	-57.2413	7	2	5.04834	0	0	0	0.511315	1	1.07639e-19	4.69521e-18	FALSE	TRUE	FALSE
MYH3	3.3444e-19	1.55195e-17	-20.5682	-68.6662	7	2	16.5725	0	0	0	0.607817	1	1.67213e-20	7.75939e-19	FALSE	TRUE	FALSE
N4BP2L2	0.00012728	0.00154221	-21.9798	-34.5815	7	2	9.9895	0	0	0	0.0166447	1	0.000702706	0.00609384	FALSE	FALSE	FALSE
NAA60	1.21982e-07	2.27387e-06	-18.2733	-38.4911	7	2	6.36164	0	0	0	0.0490112	1	1.62776e-07	2.80643e-06	FALSE	TRUE	FALSE
NAIP	6.12111e-06	9.23886e-05	-23.1144	-39.0817	7	2	15.1686	0	0	0	0.8905	1	6.04573e-07	9.5204e-06	FALSE	TRUE	FALSE
NAP1L1	0.000364378	0.0039453	-22.1017	-33.5148	7	2	22.5084	0	0	0	1	1	4.38937e-05	0.000513309	FALSE	TRUE	FALSE
NAV2	5.96184e-25	3.61188e-23	-11.6767	-73.3789	7	2	6.85102	0	0	0	0.998799	1	1.42775e-26	8.77159e-25	FALSE	TRUE	FALSE
NAXE	6.17005e-06	9.28061e-05	-17.589	-33.5476	7	2	14.1823	0	0	0	0.998305	1	5.45721e-07	8.65613e-06	FALSE	TRUE	FALSE
NCL	1.3749e-15	5.12592e-14	-34.5656	-74.0531	7	2	207.941	0	0	0	0.0373694	1	1.30619e-15	4.70874e-14	FALSE	TRUE	FALSE
NCOA7	4.92247e-51	6.5066e-49	-19.4488	-142.23	7	2	19.6715	0	0	0	0.86628	1	6.88169e-53	9.09634e-51	FALSE	TRUE	FALSE
NDUFA8	2.99347e-11	7.9619e-10	-23.917	-52.9691	7	2	39.8037	0	0	0	0.972023	1	1.53558e-12	4.32142e-11	FALSE	TRUE	FALSE
NDUFB2	0.000105443	0.00129928	-16.7929	-29.6058	7	2	13.0979	0	0	0	0.894192	1	1.2721e-05	0.000163684	FALSE	TRUE	FALSE
NDUFB5	0.000305028	0.00340289	-18.7008	-30.3158	7	2	13.0027	0	0	0	0.111732	1	0.00029408	0.00284429	FALSE	FALSE	FALSE
NDUFB9	2.06342e-08	4.16696e-07	-23.6712	-45.7948	7	2	35.3119	0	0	0	0.781925	1	1.70112e-09	3.50013e-08	FALSE	TRUE	FALSE
NDUFS4	0.000430498	0.00452489	-22.4458	-33.6691	7	2	23.3335	0	0	0	0.999999	1	5.26587e-05	0.00060288	FALSE	TRUE	FALSE
NDUFS8	5.05381e-05	0.000646472	-17.7849	-31.4198	7	2	13.0469	0	0	0	0.579137	1	8.75541e-06	0.000114345	FALSE	TRUE	FALSE
NECAP2	0.000985967	0.00941091	-15.6118	-25.8856	7	2	4.18763	0	0	0	0.145995	1	0.000814877	0.00695596	FALSE	FALSE	FALSE
NFKBIA	2.69859e-27	1.81096e-25	-23.4963	-90.723	7	2	25.587	0	0	0	1	1	5.93236e-29	4.04327e-27	FALSE	TRUE	FALSE
NFKBIZ	4.62968e-82	1.00973e-79	-18.204	-213.115	7	2	30.7256	0	0	0	0.92089	1	3.84838e-84	8.39333e-82	FALSE	TRUE	FALSE
NFS1	4.70954e-14	1.61756e-12	-29.3035	-65.1144	7	2	58.3145	0	0	0	0.690781	1	2.76313e-15	9.71996e-14	FALSE	TRUE	FALSE
NHP2	1.05357e-05	0.00015319	-15.6494	-31.02	7	2	12.0582	0	0	0	0.919017	1	1.04581e-06	1.58949e-05	FALSE	TRUE	FALSE
NME1	2.18603e-11	5.99715e-10	-29.5706	-58.9535	7	2	73.6214	0	0	0	0.136624	1	7.63198e-12	1.96986e-10	FALSE	TRUE	FALSE
NME2	7.7042e-08	1.44852e-06	-26.7579	-47.4697	7	2	51.6083	0	0	0	0.209513	1	2.44467e-08	4.51849e-07	FALSE	TRUE	FALSE
NNMT	3.92042e-08	7.70309e-07	-18.0693	-39.5059	7	2	16.9835	0	0	0	0.999826	1	2.6189e-09	5.28872e-08	FALSE	TRUE	FALSE
NOP56	1.77773e-184	1.10778e-181	-37.8686	-469.79	7	2	667.169	0	0	0	1	1	6.15952e-187	3.83826e-184	FALSE	TRUE	FALSE
NPM1	2.29945e-08	4.62221e-07	-24.3694	-46.3772	7	2	39.5159	0	0	0	0.625312	1	2.37061e-09	4.83207e-08	FALSE	TRUE	FALSE
NQO1	4.48163e-33	3.83311e-31	-29.6035	-110.411	7	2	114.315	0	0	0	0.168045	1	4.83603e-34	4.05669e-32	FALSE	TRUE	FALSE
NQO2	4.31562e-11	1.12052e-09	-25.6446	-54.3116	7	2	45.2682	0	0	0	1	1	2.18081e-12	6.05905e-11	FALSE	TRUE	FALSE
NR1D1	2.45012e-56	3.81694e-54	-20.3122	-155.447	7	2	33.1763	0	0	0	1	1	2.6996e-58	4.20559e-56	FALSE	TRUE	FALSE
NR2F1	0.000310247	0.00345229	-17.578	-29.1738	7	2	5.93612	0	0	0	0.181787	1	0.000188366	0.00190639	FALSE	FALSE	FALSE
NR3C1	1.43606e-51	1.95753e-49	-21.0019	-145.03	7	2	24.8916	0	0	0	0.591235	1	2.90782e-53	4.09158e-51	FALSE	TRUE	FALSE
NRCAM	2.50394e-15	9.17831e-14	-21.9116	-60.7763	7	2	34.4781	0	0	0	0.32347	1	2.87025e-16	1.07931e-14	FALSE	TRUE	FALSE
NSFL1C	0.000521339	0.0053634	-21.9075	-32.9124	7	2	15.825	0	0	0	0.997724	1	6.5065e-05	0.000727727	FALSE	TRUE	FALSE
NSRP1	2.57242e-06	4.05087e-05	-36.3	-53.2157	7	2	86.5645	0	0	0	0.664472	1	3.19923e-07	5.20844e-06	FALSE	TRUE	FALSE
NUP42	1.74036e-06	2.84324e-05	-25.7084	-43.05	7	2	24.7686	0	0	0	0.99227	1	1.43199e-07	2.47871e-06	FALSE	TRUE	FALSE
NUP98	8.29817e-06	0.000123538	-17.7024	-33.3356	7	2	6.18916	0	0	0	0.418843	1	1.73617e-06	2.5585e-05	FALSE	TRUE	FALSE
OAS1	0.000361365	0.00393086	-12.3521	-23.7747	7	2	3.13119	0	0	0	0.859114	1	5.03197e-05	0.000579141	FALSE	TRUE	FALSE
OASL	5.21202e-147	2.0668e-144	-26.0351	-371.35	7	2	314.579	0	0	0	0.303328	1	7.42953e-149	2.94615e-146	FALSE	TRUE	FALSE
OAZ1	1.48814e-08	3.0333e-07	-27.0139	-49.4868	7	2	65.8971	0	0	0	0.902232	1	1.05077e-09	2.21424e-08	FALSE	TRUE	FALSE
OFD1	1.36741e-08	2.81351e-07	-13.0988	-35.6621	7	2	3.32343	0	0	0	0.097105	1	8.50116e-09	1.65545e-07	FALSE	TRUE	FALSE
OSER1	4.35519e-11	1.1241e-09	-20.4012	-49.0585	7	2	12.2638	0	0	0	0.0137529	1	1.4805e-10	3.43382e-09	FALSE	TRUE	FALSE
P4HA2	3.03201e-05	0.000401995	-22.6034	-36.8063	7	2	21.378	0	0	0	0.998131	1	2.99069e-06	4.22181e-05	FALSE	TRUE	FALSE
P4HB	7.70479e-10	1.79723e-08	-30.0821	-55.7046	7	2	78.4112	0	0	0	0.347208	1	1.22434e-10	2.85592e-09	FALSE	TRUE	FALSE
PARP14	1.02851e-26	6.69607e-25	-16.876	-82.7343	7	2	11.1366	0	0	0	1	1	2.30726e-28	1.50213e-26	FALSE	TRUE	FALSE
PBDC1	2.00072e-06	3.24429e-05	-30.6901	-47.8798	7	2	56.3144	0	0	0	0.883495	1	1.85833e-07	3.17883e-06	FALSE	TRUE	FALSE
PDLIM2	0.000389488	0.00417432	-13.6046	-24.9419	7	2	7.39172	0	0	0	0.999784	1	4.72148e-05	0.000546289	FALSE	TRUE	FALSE
PELI1	4.07277e-08	7.96656e-07	-9.68794	-31.0837	7	2	2.298	0	0	0	0.130274	1	1.99431e-08	3.76588e-07	FALSE	TRUE	FALSE
PER1	1.78491e-07	3.27133e-06	-5.16156	-24.9695	7	2	2.2812	0	0	0	0.999909	1	1.28536e-08	2.44837e-07	FALSE	TRUE	FALSE
PERP	3.31527e-05	0.000435579	-18.6917	-32.7955	7	2	15.7314	0	0	0	0.615844	1	5.24847e-06	7.10989e-05	FALSE	TRUE	FALSE
PFN1	2.92394e-11	7.82468e-10	-24.6395	-53.7163	7	2	43.5319	0	0	0	0.0138098	1	9.77303e-11	2.31411e-09	FALSE	TRUE	FALSE
PGD	3.58655e-10	8.69141e-09	-17.9486	-44.3807	7	2	21.8725	0	0	0	0.94274	1	2.07667e-11	5.26653e-10	FALSE	TRUE	FALSE
PGM1	2.03994e-06	3.29563e-05	-18.6476	-35.8162	7	2	17.0959	0	0	0	0.999993	1	1.6817e-07	2.88802e-06	FALSE	TRUE	FALSE
PHLDB2	5.47713e-05	0.000698574	-12.4769	-26.0222	7	2	2.3905	0	0	0	0.20913	1	2.54527e-05	0.000310125	FALSE	TRUE	FALSE
PIK3R1	2.05663e-12	6.36242e-11	-13.6796	-45.5437	7	2	4.04579	0	0	0	0.999995	1	9.3827e-14	3.07724e-12	FALSE	TRUE	FALSE
PLCB4	3.87047e-57	6.25295e-55	-25.1735	-162.174	7	2	47.2742	0	0	0	0.625105	1	6.71846e-59	1.0854e-56	FALSE	TRUE	FALSE
PLPP1	2.32993e-06	3.71335e-05	-19.3549	-36.3785	7	2	18.9166	0	0	0	0.985784	1	1.96329e-07	3.31934e-06	FALSE	TRUE	FALSE
PLSCR1	0.00010467	0.00129341	-23.4712	-36.2924	7	2	19.3169	0	0	0	0.809979	1	1.38819e-05	0.000176539	FALSE	TRUE	FALSE
PMAIP1	1.8526e-58	3.10809e-56	-22.2008	-162.273	7	2	30.6407	0	0	0	0.145025	1	1.34891e-59	2.26306e-57	FALSE	TRUE	FALSE
POLR2L	3.86106e-06	5.97233e-05	-26.6219	-43.0939	7	2	32.8922	0	0	0	1	1	3.3095e-07	5.36657e-06	FALSE	TRUE	FALSE
POPDC3	3.70936e-11	9.68875e-10	-17.5422	-46.3686	7	2	21.1137	0	0	0	0.593875	1	3.11189e-12	8.53716e-11	FALSE	TRUE	FALSE
PPIL4	9.60683e-07	1.64333e-05	-19.7227	-37.7103	7	2	8.26912	0	0	0	0.264558	1	2.76251e-07	4.5472e-06	FALSE	TRUE	FALSE
PPM1K	2.87146e-38	2.7834e-36	-14.2462	-107.219	7	2	15.5095	0	0	0	0.0565073	1	7.98576e-39	7.74087e-37	FALSE	TRUE	FALSE
PPP1R15A	3.43756e-64	6.51942e-62	-29.9287	-183.334	7	2	114.044	0	0	0	0.000120351	0.0656213	2.69242e-62	4.69773e-60	FALSE	TRUE	FALSE
PPP2R2A	6.37075e-05	0.000803157	-20.6651	-34.0419	7	2	9.94963	0	0	0	0.999992	1	6.63144e-06	8.84597e-05	FALSE	TRUE	FALSE
PPP6R3	7.92792e-06	0.00011843	-19.7264	-35.4098	7	2	7.40169	0	0	0	0.14656	1	4.56654e-06	6.22476e-05	FALSE	TRUE	FALSE
PRAF2	0.000764789	0.00751353	-14.9231	-25.4891	7	2	8.81651	0	0	0	0.566123	1	0.000170208	0.00173469	FALSE	FALSE	FALSE
PRDX1	5.31419e-21	2.79283e-19	-30.3543	-82.7194	7	2	91.5904	0	0	0	0.385888	1	3.83551e-22	2.01572e-20	FALSE	TRUE	FALSE
PRMT3	1.83577e-27	1.25119e-25	-16.2217	-83.8424	7	2	10.5671	0	0	0	0.959312	1	4.18137e-29	2.9418e-27	FALSE	TRUE	FALSE
PRNP	4.35545e-05	0.000562085	-13.6376	-27.4381	7	2	8.78811	0	0	0	0.613704	1	7.05713e-06	9.38512e-05	FALSE	TRUE	FALSE
PRPF4B	0.000393699	0.00420911	-17.076	-28.4011	7	2	12.1372	0	0	0	0.0390426	1	0.00104948	0.00875303	FALSE	FALSE	FALSE
PSMA7	6.66363e-11	1.68016e-09	-35.4542	-63.6635	7	2	129.117	0	0	0	0.382855	1	8.78486e-12	2.25409e-10	FALSE	TRUE	FALSE
PSMB4	1.8108e-11	5.06329e-10	-30.099	-59.68	7	2	98.1178	0	0	0	0.255137	1	3.4008e-12	9.27144e-11	FALSE	TRUE	FALSE
PSMB5	0.000136951	0.00164115	-21.0326	-33.552	7	2	18.0573	0	0	0	1	1	1.51548e-05	0.000191055	FALSE	TRUE	FALSE
PSMC5	0.000735758	0.00729404	-16.1168	-26.7273	7	2	9.14413	0	0	0	0.445603	1	0.000204998	0.00204623	FALSE	FALSE	FALSE
PTEN	1.81056e-11	5.06329e-10	-19.2469	-48.828	7	2	9.12191	0	0	0	0.00248665	0.638046	3.20023e-10	7.12213e-09	FALSE	TRUE	FALSE
PTGR1	2.88037e-06	4.51949e-05	-23.2756	-40.0678	7	2	33.2655	0	0	0	1	1	2.42461e-07	4.06774e-06	FALSE	TRUE	FALSE
PTGS2	9.22257e-80	1.91566e-77	-17.5472	-207.123	7	2	31.1787	0	0	0	0.98482	1	7.37048e-82	1.53095e-79	FALSE	TRUE	FALSE
PUF60	0.000239382	0.00271923	-22.6765	-34.5661	7	2	20.7184	0	0	0	0.398461	1	6.71682e-05	0.000749329	FALSE	TRUE	FALSE
PYCR1	0.000748383	0.00740237	-15.8029	-26.3939	7	2	9.66477	0	0	0	0.183486	1	0.000485801	0.00445181	FALSE	FALSE	FALSE
RAB31	2.2869e-05	0.000313694	-21.3641	-35.8794	7	2	16.7298	0	0	0	0.566554	1	3.82246e-06	5.29319e-05	FALSE	TRUE	FALSE
RAB5IF	3.13171e-12	9.48648e-11	-23.4909	-54.9144	7	2	41.0609	0	0	0	0.891213	1	1.62202e-13	5.05375e-12	FALSE	TRUE	FALSE
RACK1	2.81255e-12	8.57926e-11	-31.7272	-63.2633	7	2	121.137	0	0	0	1	1	1.29606e-13	4.12656e-12	FALSE	TRUE	FALSE
RAN	0.000252166	0.00284224	-22.593	-34.4237	7	2	22.5179	0	0	0	0.0137595	1	0.00174182	0.0135434	FALSE	FALSE	FALSE
RBBP6	4.93674e-07	8.75368e-06	-27.3676	-46.0769	7	2	32.9924	0	0	0	0.0153446	1	2.17051e-06	3.15592e-05	FALSE	TRUE	FALSE
RBFOX2	2.4724e-05	0.000338076	-18.2831	-32.7121	7	2	7.87635	0	0	0	0.311766	1	7.39719e-06	9.80746e-05	FALSE	TRUE	FALSE
RBM39	5.04841e-20	2.5024e-18	-31.5642	-81.6114	7	2	82.0104	0	0	0	0.889297	1	1.66588e-21	8.3524e-20	FALSE	TRUE	FALSE
RBM5	1.26144e-11	3.61999e-10	-29.1116	-59.0726	7	2	41.43	0	0	0	0.732738	1	8.29425e-13	2.41197e-11	FALSE	TRUE	FALSE
RDX	3.19151e-05	0.000420586	-28.7758	-42.9217	7	2	41.4256	0	0	0	0.355692	1	8.55885e-06	0.000112113	FALSE	TRUE	FALSE
REV3L	5.74391e-05	0.000728341	-27.5963	-41.0886	7	2	35.5072	0	0	0	0.927962	1	6.37535e-06	8.53046e-05	FALSE	TRUE	FALSE
RHOA	3.47896e-08	6.89783e-07	-23.7884	-45.353	7	2	40.9043	0	0	0	0.0758597	1	2.86618e-08	5.23596e-07	FALSE	TRUE	FALSE
RHOBTB3	0.000551103	0.00556461	-15.9483	-26.8898	7	2	10.3707	0	0	0	0.328526	1	0.000199943	0.00200957	FALSE	FALSE	FALSE
RHOC	0.00102714	0.00978253	-23.5793	-33.8059	7	2	25.5332	0	0	0	0.921828	1	0.000147768	0.0015274	FALSE	FALSE	FALSE
RINT1	3.01805e-08	6.01129e-07	-18.545	-40.2617	7	2	7.02704	0	0	0	1	1	1.99094e-09	4.07723e-08	FALSE	TRUE	FALSE
RIOK3	0.000401727	0.00428443	-9.79676	-21.0989	7	2	1.63312	0	0	0	0.296838	1	0.000156132	0.00160246	FALSE	FALSE	FALSE
RIPK2	0.000326238	0.00360266	-18.3438	-29.8825	7	2	6.03794	0	0	0	0.445056	1	8.45447e-05	0.000917373	FALSE	TRUE	FALSE
RLF	2.54998e-11	6.90869e-10	-12.2833	-41.5042	7	2	3.75881	0	0	0	0.279111	1	4.43543e-12	1.17257e-10	FALSE	TRUE	FALSE
RNMT	1.13842e-08	2.35976e-07	-19.1623	-41.9213	7	2	8.60096	0	0	0	0.867798	1	8.25028e-10	1.7641e-08	FALSE	TRUE	FALSE
ROMO1	0.000138263	0.00165233	-24.2842	-36.7929	7	2	29.3085	0	0	0	1	1	1.5312e-05	0.000192481	FALSE	TRUE	FALSE
RPL27	5.90127e-07	1.02965e-05	-32.1421	-50.6581	7	2	133.602	0	0	0	0.999994	1	4.52992e-08	8.19896e-07	FALSE	TRUE	FALSE
RPL27A	1.17978e-05	0.000169842	-32.2741	-47.5202	7	2	70.4037	0	0	0	1	1	1.08729e-06	1.64109e-05	FALSE	TRUE	FALSE
RPL30	2.61702e-05	0.000353419	-34.8458	-49.2118	7	2	130.892	0	0	0	0.999885	1	2.54972e-06	3.68274e-05	FALSE	TRUE	FALSE
RPL5	1.59199e-06	2.63041e-05	-28.0141	-45.4527	7	2	66.6594	0	0	0	0.468975	1	2.70031e-07	4.47861e-06	FALSE	TRUE	FALSE
RPL8	6.93542e-16	2.63064e-14	-28.2992	-68.497	7	2	93.2451	0	0	0	0.977289	1	2.58237e-17	1.02403e-15	FALSE	TRUE	FALSE
RPLP0	2.0469e-14	7.14287e-13	-32.5713	-69.2504	7	2	129.191	0	0	0	1	1	8.14586e-16	2.9859e-14	FALSE	TRUE	FALSE
RPLP1	0.000191699	0.0022418	-29.8122	-41.9528	7	2	65.1235	0	0	0	0.832671	1	2.60228e-05	0.000316188	FALSE	TRUE	FALSE
RPLP2	4.58042e-06	7.03514e-05	-29.0383	-45.3233	7	2	65.2512	0	0	0	0.92353	1	4.28711e-07	6.92606e-06	FALSE	TRUE	FALSE
RPN2	5.02548e-08	9.6569e-07	-23.6481	-44.8185	7	2	38.1227	0	0	0	0.260381	1	1.26428e-08	2.41877e-07	FALSE	TRUE	FALSE
RPS13	2.33255e-06	3.71335e-05	-35.1726	-52.195	7	2	150.193	0	0	0	1	1	1.93846e-07	3.2901e-06	FALSE	TRUE	FALSE
RPS14	3.75458e-18	1.55976e-16	-38.3362	-83.9377	7	2	317.952	0	0	0	1	1	1.20824e-19	5.21817e-18	FALSE	TRUE	FALSE
RPS15	2.15356e-05	0.000296336	-23.7904	-38.3722	7	2	30.2754	0	0	0	0.656109	1	3.11044e-06	4.36389e-05	FALSE	TRUE	FALSE
RPS16	0.000751685	0.00741822	-28.175	-38.7609	7	2	47.9989	0	0	0	1	1	9.69705e-05	0.00104699	FALSE	FALSE	FALSE
RPS19	0.000182994	0.00215154	-29.1568	-41.3498	7	2	91.9595	0	0	0	0.999851	1	2.07511e-05	0.000255695	FALSE	TRUE	FALSE
RPS2	2.02007e-11	5.61244e-10	-33.1779	-62.6438	7	2	99.2393	0	0	0	0.722114	1	1.36922e-12	3.87826e-11	FALSE	TRUE	FALSE
RPS21	0.000234785	0.00267397	-23.4022	-35.3138	7	2	30.7892	0	0	0	0.999889	1	2.72001e-05	0.000329575	FALSE	TRUE	FALSE
RPS23	2.49963e-21	1.38017e-19	-38.8347	-91.9756	7	2	288.302	0	0	0	1	1	6.92416e-23	3.82319e-21	FALSE	TRUE	FALSE
RPS3	1.24922e-09	2.85292e-08	-30.8128	-55.9229	7	2	87.5813	0	0	0	1	1	7.17147e-11	1.73789e-09	FALSE	TRUE	FALSE
RPS4X	3.0179e-09	6.51687e-08	-27.4148	-51.5881	7	2	49.562	0	0	0	0.999999	1	1.79688e-10	4.10024e-09	FALSE	TRUE	FALSE
RPS5	0.000756576	0.00744963	-26.3024	-36.8809	7	2	36.9217	0	0	0	1	1	9.76637e-05	0.00105187	FALSE	FALSE	FALSE
RPS6KC1	7.83807e-12	2.31011e-10	-13.8369	-44.2978	7	2	4.62524	0	0	0	0.999999	1	3.7352e-13	1.12365e-11	FALSE	TRUE	FALSE
RPS7	0.000699532	0.00696657	-28.8433	-39.5117	7	2	59.1396	0	0	0	0.146827	1	0.000557682	0.00502605	FALSE	FALSE	FALSE
RSAD2	5.13702e-165	2.80096e-162	-21.314	-408.261	7	2	212.627	0	0	0	0.00023506	0.113926	8.35839e-164	4.55741e-161	FALSE	TRUE	FALSE
RSF1	0.000329453	0.00362898	-17.4411	-28.9687	7	2	6.76697	0	0	0	0.0389007	1	0.00086962	0.00735132	FALSE	FALSE	FALSE
RSRC2	5.12533e-25	3.14883e-23	-24.0883	-85.9455	7	2	26.6071	0	0	0	0.0178234	1	6.63794e-25	3.91279e-23	FALSE	TRUE	FALSE
RTCA	6.24371e-10	1.46425e-08	-16.6313	-42.4766	7	2	6.10456	0	0	0	0.0201045	1	1.60287e-09	3.31361e-08	FALSE	TRUE	FALSE
RTL9	6.93575e-21	3.60163e-19	-8.96145	-61.0525	7	2	4.75802	0	0	0	1	1	1.95923e-22	1.04221e-20	FALSE	TRUE	FALSE
RUVBL1	0.000586445	0.00589418	-21.6248	-32.4953	7	2	20.2918	0	0	0	0.363848	1	0.000194111	0.00195998	FALSE	FALSE	FALSE
S100A6	2.30765e-07	4.19415e-06	-53.3051	-72.8361	7	2	890.538	0	0	0	0.999985	1	1.68405e-08	3.19383e-07	FALSE	TRUE	FALSE
SAMD9	5.75152e-15	2.0734e-13	-17.4151	-55.4153	7	2	8.19098	0	0	0	0.975761	1	2.26561e-16	8.59356e-15	FALSE	TRUE	FALSE
SAMHD1	2.12932e-09	4.71477e-08	-14.2368	-38.7808	7	2	4.2981	0	0	0	0.836842	1	1.48783e-10	3.43382e-09	FALSE	TRUE	FALSE
SAR1A	8.46502e-14	2.88472e-12	-22.1662	-57.3656	7	2	16.5936	0	0	0	0.0299923	1	1.11099e-13	3.58973e-12	FALSE	TRUE	FALSE
SARAF	2.69992e-07	4.86655e-06	-17.5246	-36.8861	7	2	16.7624	0	0	0	0.903066	1	2.19436e-08	4.09052e-07	FALSE	TRUE	FALSE
SARDH	5.52061e-08	1.05618e-06	-19.5098	-40.5793	7	2	9.29963	0	0	0	0.741929	1	5.01794e-09	9.94921e-08	FALSE	TRUE	FALSE
SCAF8	0.000499129	0.00514705	-15.9081	-26.9627	7	2	3.83542	0	0	0	0.388758	1	0.000152843	0.00157241	FALSE	FALSE	FALSE
SCML1	1.35135e-06	2.28472e-05	-15.3502	-32.9671	7	2	4.18589	0	0	0	0.114879	1	8.89667e-07	1.37128e-05	FALSE	TRUE	FALSE
SDF2L1	0.000249419	0.00281856	-13.0306	-24.8737	7	2	7.51073	0	0	0	1	1	2.90443e-05	0.000350945	FALSE	TRUE	FALSE
SEC24D	0.000354146	0.00386196	-19.8943	-31.3398	7	2	15.4833	0	0	0	0.555802	1	7.47236e-05	0.000823092	FALSE	TRUE	FALSE
SEC62	0.00054395	0.00552349	-19.7652	-30.7216	7	2	16.4604	0	0	0	1	1	6.80119e-05	0.000756806	FALSE	TRUE	FALSE
SEM1	0.000109526	0.001342	-16.2955	-29.0659	7	2	10.4493	0	0	0	0.356	1	3.21462e-05	0.000385225	FALSE	TRUE	FALSE
SEMA3A	7.33473e-25	4.38275e-23	-22.7801	-84.27	7	2	25.9814	0	0	0	0.870919	1	2.01907e-26	1.22322e-24	FALSE	TRUE	FALSE
SERINC3	0.000101452	0.0012572	-22.028	-34.8843	7	2	24.2392	0	0	0	0.890606	1	1.22489e-05	0.000158545	FALSE	TRUE	FALSE
SF3B1	4.74674e-07	8.45113e-06	-23.1806	-41.9323	7	2	19.4203	0	0	0	0.0603698	1	5.52309e-07	8.72889e-06	FALSE	TRUE	FALSE
SKP1	1.2512e-13	4.23079e-12	-29.1256	-63.9172	7	2	77.114	0	0	0	0.641632	1	8.11841e-15	2.81052e-13	FALSE	TRUE	FALSE
SLC25A17	0.000123769	0.00150804	-20.3909	-33.024	7	2	8.46561	0	0	0	0.198746	1	6.41517e-05	0.000719356	FALSE	TRUE	FALSE
SLC25A6	0.000834887	0.00812896	-26.3079	-36.7732	7	2	40.4997	0	0	0	0.291197	1	0.000352972	0.0033326	FALSE	FALSE	FALSE
SLC4A8	2.07253e-06	3.33594e-05	-30.2196	-47.3709	7	2	51.8763	0	0	0	0.632293	1	2.67031e-07	4.44576e-06	FALSE	TRUE	FALSE
SLU7	4.60903e-08	8.89584e-07	-22.2702	-43.5333	7	2	14.6467	0	0	0	0.102449	1	2.86885e-08	5.23596e-07	FALSE	TRUE	FALSE
SMARCA5	1.24034e-09	2.84756e-08	-48.5264	-73.644	7	2	480.548	0	0	0	1	1	7.11843e-11	1.73467e-09	FALSE	TRUE	FALSE
SMARCB1	0.000149496	0.0017817	-15.1842	-27.605	7	2	8.83164	0	0	0	0.0666303	1	0.000223357	0.00221933	FALSE	FALSE	FALSE
SMC6	6.77592e-06	0.000101569	-31.305	-47.1608	7	2	73.8283	0	0	0	0.910087	1	6.59576e-07	1.03492e-05	FALSE	TRUE	FALSE
SMURF1	7.22203e-09	1.52186e-07	-11.7823	-35.0267	7	2	5.43383	0	0	0	0.492956	1	8.92347e-10	1.89874e-08	FALSE	TRUE	FALSE
SP100	2.98981e-24	1.76237e-22	-22.7011	-82.7509	7	2	23.6023	0	0	0	1	1	7.34503e-26	4.38891e-24	FALSE	TRUE	FALSE
SPAG9	2.41465e-06	3.8162e-05	-13.7438	-30.7285	7	2	4.38706	0	0	0	0.00946568	1	1.82804e-05	0.000227825	FALSE	TRUE	FALSE
SPARC	1.42537e-06	2.38217e-05	-25.3057	-42.8646	7	2	26.0703	0	0	0	0.977228	1	1.17648e-07	2.05273e-06	FALSE	TRUE	FALSE
SPRY2	8.35603e-20	4.00539e-18	-15.0846	-64.6126	7	2	6.32353	0	0	0	0.632664	1	3.90234e-21	1.91259e-19	FALSE	TRUE	FALSE
SRFBP1	0.000188788	0.00221369	-29.7204	-41.8782	7	2	31.5073	0	0	0	0.321181	1	6.38644e-05	0.000717981	FALSE	TRUE	FALSE
SRI	1.21309e-10	3.00654e-09	-16.9268	-44.5041	7	2	20.0599	0	0	0	0.877895	1	7.23213e-12	1.87777e-10	FALSE	TRUE	FALSE
SRPK2	2.0766e-26	1.31278e-24	-25.2186	-90.3581	7	2	35.7459	0	0	0	0.889172	1	5.29131e-28	3.34503e-26	FALSE	TRUE	FALSE
SRSF11	8.22084e-12	2.40666e-10	-36.867	-67.2778	7	2	123.447	0	0	0	1	1	3.92385e-13	1.17232e-11	FALSE	TRUE	FALSE
SRSF3	7.92189e-20	3.88262e-18	-43.9983	-93.5813	7	2	629.472	0	0	0	0.433162	1	5.37724e-21	2.60617e-19	FALSE	TRUE	FALSE
SSR2	0.000487504	0.00503909	-18.1067	-29.1882	7	2	12.8007	0	0	0	0.740141	1	8.0483e-05	0.000879867	FALSE	TRUE	FALSE
STAT1	1.98306e-05	0.000273738	-19.6743	-34.3474	7	2	11.1465	0	0	0	0.222435	1	8.09607e-06	0.000106371	FALSE	TRUE	FALSE
SUMO3	1.63018e-07	3.01306e-06	-19.9123	-39.8179	7	2	10.773	0	0	0	0.999999	1	1.16836e-08	2.25504e-07	FALSE	TRUE	FALSE
SUN1	0.000424927	0.00447713	-18.5149	-29.7531	7	2	5.84146	0	0	0	0.460438	1	0.000109108	0.00115237	FALSE	FALSE	FALSE
TALDO1	4.22626e-12	1.27137e-10	-23.0637	-54.1728	7	2	38.0495	0	0	0	0.0771769	1	2.45279e-12	6.77158e-11	FALSE	TRUE	FALSE
TCEA1	0.000101179	0.0012572	-15.5912	-28.4505	7	2	10.5228	0	0	0	0.570162	1	1.87646e-05	0.000232532	FALSE	TRUE	FALSE
TENT2	0.000163014	0.00193751	-14.7615	-27.0848	7	2	3.24877	0	0	0	0.612514	1	2.93254e-05	0.000353363	FALSE	TRUE	FALSE
TENT5A	1.376e-13	4.61699e-12	-20.912	-55.6045	7	2	12.0409	0	0	0	1	1	5.78048e-15	2.01716e-13	FALSE	TRUE	FALSE
TFPI2	8.14509e-15	2.86523e-13	-20.5278	-58.1661	7	2	14.0254	0	0	0	0.996663	1	3.17146e-16	1.18238e-14	FALSE	TRUE	FALSE
TGFB2	4.72739e-19	2.14801e-17	-23.1201	-70.8611	7	2	22.7685	0	0	0	0.0408641	1	3.44071e-19	1.42937e-17	FALSE	TRUE	FALSE
TGFBI	5.06091e-19	2.27585e-17	-27.6843	-75.3549	7	2	73.6241	0	0	0	0.00506205	1	2.90847e-18	1.1747e-16	FALSE	TRUE	FALSE
THRA	2.86631e-07	5.1452e-06	-16.9147	-36.2117	7	2	5.32769	0	0	0	1	1	2.11576e-08	3.96093e-07	FALSE	TRUE	FALSE
TIMM13	0.000132079	0.00159151	-13.5851	-26.1452	7	2	8.31173	0	0	0	0.904925	1	1.60434e-05	0.000201095	FALSE	TRUE	FALSE
TIMM8B	0.000535823	0.00547471	-15.7766	-26.7502	7	2	9.39295	0	0	0	0.598208	1	0.0001094	0.00115267	FALSE	FALSE	FALSE
TIPARP	6.06247e-39	6.01011e-37	-26.5956	-121.149	7	2	63.0926	0	0	0	0.508252	1	1.86573e-40	1.93769e-38	FALSE	TRUE	FALSE
TKT	1.26805e-09	2.88086e-08	-25.7365	-50.8307	7	2	37.3469	0	0	0	1	1	7.28402e-11	1.75541e-09	FALSE	TRUE	FALSE
TMED9	1.19412e-05	0.000171341	-19.7536	-34.9864	7	2	17.2381	0	0	0	0.746437	1	1.46217e-06	2.16939e-05	FALSE	TRUE	FALSE
TMEM165	1.51067e-88	3.46818e-86	-20.774	-230.732	7	2	38.1715	0	0	0	0.760935	1	1.41069e-90	3.23865e-88	FALSE	TRUE	FALSE
TMEM258	0.00104914	0.00997023	-19.401	-29.6032	7	2	13.7768	0	0	0	0.97139	1	0.000143879	0.00149429	FALSE	FALSE	FALSE
TNFAIP3	4.41142e-08	8.55227e-07	-7.63498	-28.9451	7	2	1.9529	0	0	0	0.948359	1	3.12069e-09	6.27302e-08	FALSE	TRUE	FALSE
TNFRSF10B	2.52644e-05	0.000343312	-8.5317	-22.9367	7	2	1.70853	0	0	0	0.392624	1	6.05967e-06	8.13301e-05	FALSE	TRUE	FALSE
TNFRSF11B	2.97657e-10	7.25351e-09	-26.8629	-53.4921	7	2	58.7762	0	0	0	0.647643	1	2.47389e-11	6.20178e-10	FALSE	TRUE	FALSE
TOP2A	4.42701e-19	2.0327e-17	-26.597	-74.4058	7	2	69.2129	0	0	0	0.935219	1	1.45346e-20	6.81718e-19	FALSE	TRUE	FALSE
TPI1	3.07384e-11	8.12611e-10	-31.3293	-60.3536	7	2	93.2569	0	0	0	0.00150771	0.505896	9.01066e-10	1.90798e-08	FALSE	TRUE	FALSE
TPM1	6.11588e-17	2.42523e-15	-31.5764	-74.2915	7	2	112.44	0	0	0	8.80569e-06	0.00960261	2.04074e-13	6.31326e-12	FALSE	TRUE	FALSE
TPM3	4.38021e-08	8.52967e-07	-22.1754	-43.4931	7	2	30.4137	0	0	0	0.598126	1	4.86018e-09	9.68042e-08	FALSE	TRUE	FALSE
TPT1	1.4752e-06	2.45604e-05	-39.9178	-57.4393	7	2	198.359	0	0	0	0.00177457	0.516044	5.45107e-05	0.000620824	FALSE	TRUE	FALSE
TRA2B	0.000248198	0.00281206	-18.458	-30.3067	7	2	6.80681	0	0	0	0.474103	1	5.91366e-05	0.000668274	FALSE	TRUE	FALSE
TRIP10	0.000218884	0.00251919	-15.77	-27.7608	7	2	4.1042	0	0	0	0.0346843	1	0.000625225	0.00553191	FALSE	FALSE	FALSE
TRMT13	8.99489e-11	2.24204e-09	-24.3266	-52.2195	7	2	21.9672	0	0	0	1	1	4.66702e-12	1.22636e-10	FALSE	TRUE	FALSE
TUBA1A	5.5214e-11	1.40025e-09	-24.54	-52.9474	7	2	35.7371	0	0	0	0.790579	1	3.54608e-12	9.60745e-11	FALSE	TRUE	FALSE
TUBA1B	1.25766e-27	8.70778e-26	-28.9767	-96.984	7	2	103.437	0	0	0	0.611218	1	4.45618e-29	3.08537e-27	FALSE	TRUE	FALSE
TUBA1C	3.07793e-21	1.65752e-19	-33.7846	-86.7115	7	2	137.932	0	0	0	0.481368	1	1.76616e-22	9.51109e-21	FALSE	TRUE	FALSE
TUBA4A	2.6567e-07	4.80852e-06	-17.4635	-36.8425	7	2	15.1977	0	0	0	0.323725	1	5.86389e-08	1.05261e-06	FALSE	TRUE	FALSE
TXNRD1	1.31234e-12	4.08888e-11	-18.7232	-51.058	7	2	24.4926	0	0	0	0.973698	1	6.05968e-14	2.01774e-12	FALSE	TRUE	FALSE
UBA52	2.67517e-05	0.000359049	-26.9047	-41.2464	7	2	46.2791	0	0	0	0.995065	1	2.62273e-06	3.77569e-05	FALSE	TRUE	FALSE
UBN2	2.69273e-15	9.78806e-14	-10.2389	-49.0281	7	2	3.73016	0	0	0	0.969173	1	1.04667e-16	4.0049e-15	FALSE	TRUE	FALSE
UQCR10	2.89775e-06	4.53046e-05	-15.2877	-32.0734	7	2	11.805	0	0	0	1	1	2.43956e-07	4.07715e-06	FALSE	TRUE	FALSE
UQCRQ	1.14179e-05	0.000164916	-22.6992	-37.9813	7	2	21.9966	0	0	0	1	1	1.04995e-06	1.59024e-05	FALSE	TRUE	FALSE
URI1	2.66997e-09	5.79424e-08	-35.1029	-59.4064	7	2	102.057	0	0	0	0.711356	1	2.20827e-10	4.99092e-09	FALSE	TRUE	FALSE
USP15	9.82012e-06	0.000143743	-18.1932	-33.6413	7	2	6.44605	0	0	0	0.982291	1	9.09569e-07	1.39702e-05	FALSE	TRUE	FALSE
USP47	9.90662e-07	1.688e-05	-20.9735	-38.9278	7	2	14.1822	0	0	0	0.999999	1	7.82925e-08	1.39393e-06	FALSE	TRUE	FALSE
USP9X	2.18503e-18	9.25351e-17	-22.9336	-69.0943	7	2	20.2637	0	0	0	0.858265	1	8.0825e-20	3.5612e-18	FALSE	TRUE	FALSE
VCAM1	7.28088e-32	5.9923e-30	-18.0052	-95.9716	7	2	12.3469	0	0	0	0.999995	1	1.38293e-33	1.13818e-31	FALSE	TRUE	FALSE
VMP1	0.000372664	0.00401373	-24.6552	-36.0428	7	2	26.9542	0	0	0	0.14341	1	0.000287952	0.00279122	FALSE	FALSE	FALSE
VPS50	7.05367e-11	1.76828e-09	-25.2153	-53.3646	7	2	28.1269	0	0	0	0.995083	1	3.64528e-12	9.81527e-11	FALSE	TRUE	FALSE
WASHC4	5.3422e-12	1.58522e-10	-22.0306	-52.8938	7	2	16.7929	0	0	0	0.206115	1	1.18893e-12	3.41192e-11	FALSE	TRUE	FALSE
WDR36	0.000797583	0.00780057	-18.0604	-28.5782	7	2	4.98861	0	0	0	0.987504	1	0.000104748	0.0011117	FALSE	FALSE	FALSE
WDR54	2.93582e-05	0.000390428	-13.5399	-27.7785	7	2	7.87114	0	0	0	1	1	2.88327e-06	4.12355e-05	FALSE	TRUE	FALSE
WDR61	0.00086724	0.00838781	-28.9046	-39.3261	7	2	50.9814	0	0	0	0.328388	1	0.000328213	0.00312591	FALSE	FALSE	FALSE
XBP1	5.61899e-17	2.24863e-15	-19.5871	-62.3899	7	2	10.5239	0	0	0	0.817325	1	2.34821e-18	9.57282e-17	FALSE	TRUE	FALSE
XPO1	3.5601e-20	1.78496e-18	-18.9791	-69.3862	7	2	11.1602	0	0	0	1	1	1.0386e-21	5.26788e-20	FALSE	TRUE	FALSE
XRCC6	1.45931e-08	2.98851e-07	-38.253	-60.7468	7	2	166.724	0	0	0	0.833866	1	1.11203e-09	2.33206e-08	FALSE	TRUE	FALSE
YTHDC1	9.65751e-06	0.000141839	-16.0369	-31.5034	7	2	4.64299	0	0	0	0.291413	1	2.89826e-06	4.12771e-05	FALSE	TRUE	FALSE
YTHDF2	1.85385e-06	3.01735e-05	-30.9917	-48.2645	7	2	92.5296	0	0	0	0.196447	1	7.38236e-07	1.15419e-05	FALSE	TRUE	FALSE
YWHAB	2.16307e-11	5.97171e-10	-25.4523	-54.8463	7	2	50.1724	0	0	0	0.931842	1	1.14365e-12	3.30372e-11	FALSE	TRUE	FALSE
YWHAQ	0.000424742	0.00447713	-24.6684	-35.9071	7	2	24.7171	0	0	0	0.854691	1	6.03201e-05	0.000679887	FALSE	TRUE	FALSE
YWHAZ	0.00105288	0.00998405	-19.2344	-29.4325	7	2	11.7073	0	0	0	0.24841	1	0.000529099	0.00479819	FALSE	FALSE	FALSE
YY1AP1	9.46047e-06	0.000139414	-16.0887	-31.5778	7	2	5.30779	0	0	0	0.844623	1	1.01188e-06	1.54329e-05	FALSE	TRUE	FALSE
ZBED5	1.11614e-42	1.31583e-40	-28.1169	-131.402	7	2	74.7608	0	0	0	0.945285	1	1.69781e-44	2.00158e-42	FALSE	TRUE	FALSE
ZBTB10	2.17785e-13	7.25175e-12	-11.8525	-46.0655	7	2	3.71534	0	0	0	0.859793	1	1.07626e-14	3.69656e-13	FALSE	TRUE	FALSE
ZC3HAV1	1.34943e-263	1.96207e-260	-24.941	-639.571	7	2	229.495	0	0	0	0.0239352	1	1.3695e-264	1.99125e-261	FALSE	TRUE	FALSE
ZEB2	8.06219e-20	3.90747e-18	-13.1252	-62.6901	7	2	5.32635	0	0	0	1	1	2.39117e-21	1.18526e-19	FALSE	TRUE	FALSE
ZFAND2A	0.000340157	0.00372805	-16.5368	-28.0281	7	2	4.78211	0	0	0	0.282608	1	0.000136584	0.00142191	FALSE	FALSE	FALSE
ZFP36	1.19163e-11	3.44231e-10	-15.2289	-45.2497	7	2	4.87755	0	0	0	0.977407	1	5.89009e-13	1.74779e-11	FALSE	TRUE	FALSE
ZMYND8	0.000179852	0.00212031	-27.678	-39.8905	7	2	43.9159	0	0	0	0.999999	1	2.03619e-05	0.000251611	FALSE	TRUE	FALSE
ZNF200	1.05451e-39	1.14994e-37	-15.8307	-112.161	7	2	13.5102	0	0	0	0.0220647	1	7.21926e-40	7.32335e-38	FALSE	TRUE	FALSE
ZNF451	8.12799e-22	4.54542e-20	-19.8082	-74.1043	7	2	15.0475	0	0	0	1	1	2.2045e-23	1.23282e-21	FALSE	TRUE	FALSE
ZNF462	6.90473e-16	2.63064e-14	-13.5379	-53.7404	7	2	5.08682	0	0	0	1	1	2.51298e-17	1.00565e-15	FALSE	TRUE	FALSE
ZNF875	4.97982e-11	1.27029e-09	-34.3409	-62.8571	7	2	122.062	0	0	0	0.490798	1	5.09088e-12	1.32973e-10	FALSE	TRUE	FALSE
G	0	0	-60.7987	-1563.79	7	2	70492.5	0	0	0	0.562453	1	0	0	FALSE	TRUE	FALSE
L	2.29585e-190	1.66908e-187	-42.7135	-488.241	7	2	2126.55	0	0	0	0.601213	1	1.28206e-192	9.3206e-190	FALSE	TRUE	FALSE
M	9.01163e-75	1.78676e-72	-41.6428	-219.635	7	2	2764.21	0	0	0	0.995321	1	7.58727e-77	1.50435e-74	FALSE	TRUE	FALSE
N	1.17983e-191	1.02929e-188	-61.4007	-509.907	7	2	44181.8	0	0	0	0.389936	1	1.00862e-193	8.7992e-191	FALSE	TRUE	FALSE
NS	0	0	-52.0906	-1296.73	7	2	51682.5	0	0	0	0.0160067	1	0	0	FALSE	TRUE	FALSE

## Sheet: Gene_counts_salmon
	Glia_1h_V1	Glia_1h_V2	Glia_6h_V1	Glia_6h_V2	Glia_15h_V1	Glia_15h_V2	Glia_24h_V1	Glia_24h_V2	Fibroblast_1h_V1	Fibroblast_1h_V2	Fibroblast_6h_V1	Fibroblast_6h_V2	Fibroblast_15h_V1	Fibroblast_15h_V2	Fibroblast_24h_V1	Fibroblast_24h_V2
A1BG	19	24	17	9	1	0	0	0	0	0	0	0	0	0	0	0
A4GALT	2	2	1	1	0	0	0	0	18	17	3	5	0	0	1	3
AAMDC	57	48	40	48	16	17	18	20	9	13	3	4	0	3	0	0
AAR2	12	9	11	7	0	1	2	1	2	1	0	1	0	2	0	1
AARS1	6	19	14	6	0	0	0	0	20	23	6	6	0	15	13	7
AASDHPPT	6	9	21	10	1	1	5	1	3	3	2	3	0	3	3	2
AATF	7	10	15	9	2	0	1	3	36	28	5	11	31	36	85	86
ABCB1	0	0	1	1	0	0	0	0	83	90	26	65	17	44	42	36
ABCB10	1	1	0	1	0	0	1	0	22	11	1	10	5	11	3	9
ABCB6	8	13	12	7	0	0	0	0	4	2	0	2	0	3	1	2
ABCC3	26	18	19	21	0	4	3	1	40	42	11	16	10	22	13	11
ABCC4	10	10	8	9	0	0	1	2	58	35	13	24	36	23	7	9
ABCD3	6	12	13	4	2	0	0	0	3	4	0	3	2	0	3	3
ABCD4	3	1	1	1	0	0	1	0	8	11	0	6	0	1	2	2
ABCE1	25	27	32	37	4	3	6	3	52	39	7	21	14	48	51	36
ABCF1	16	21	14	11	1	1	2	8	19	18	0	3	1	5	6	12
ABHD11	3	1	6	2	0	1	0	0	23	20	0	6	0	2	2	6
ABHD14A	1	0	3	2	0	0	0	0	8	15	1	6	2	0	5	1
ABHD14B	4	12	6	7	0	0	0	0	0	10	1	1	0	3	1	0
ABHD16A	3	9	5	1	2	0	0	0	11	10	0	6	0	1	2	4
ABHD2	1	1	0	0	0	0	1	0	5	12	1	1	0	1	0	1
ABI2	7	9	3	7	0	0	1	1	24	22	3	8	0	1	3	5
ABL1	1	0	2	3	0	0	0	0	4	12	1	0	0	1	1	1
ABLIM3	0	1	1	2	0	1	0	0	14	16	4	9	1	4	2	7
ABRAXAS1	121	168	109	109	40	23	32	30	5	2	0	0	0	0	0	0
ABT1	4	13	2	5	0	0	0	0	3	2	1	1	0	0	2	3
ACAA1	6	7	12	9	0	0	1	0	4	10	0	1	0	0	0	3
ACAA2	19	23	25	9	3	0	0	0	70	50	11	24	3	10	17	18
ACAD9	0	1	4	2	0	0	0	1	10	11	4	4	0	0	1	1
ACADM	60	40	75	39	6	1	6	6	526	396	175	255	238	324	255	140
ACADS	3	2	1	1	0	0	0	0	4	10	2	3	2	4	4	3
ACADVL	73	95	87	50	4	5	6	2	30	48	5	22	4	35	25	28
ACAT1	139	146	223	121	12	3	7	6	914	677	264	309	998	636	589	329
ACBD3	8	12	7	5	0	2	0	1	14	11	0	5	2	6	2	5
ACBD6	6	10	17	4	0	0	0	1	22	22	0	6	0	3	2	2
ACD	3	6	11	9	1	2	0	0	4	4	0	3	2	2	1	2
ACE	1	1	0	0	0	0	0	0	22	26	3	11	6	12	10	16
ACIN1	10	8	8	4	1	0	2	0	21	21	3	11	3	15	17	35
ACLY	3	0	7	7	0	0	0	1	28	31	6	20	2	6	7	6
ACO1	4	4	9	6	10	8	4	1	14	17	3	11	3	13	1	7
ACO2	15	20	18	14	4	2	3	2	52	74	31	37	15	46	31	39
ACOT13	18	17	31	8	0	2	0	2	22	17	3	9	1	8	6	3
ACOT7	13	18	18	8	2	2	2	1	23	14	2	8	0	3	3	9
ACOT8	19	24	23	7	0	0	0	1	4	6	0	2	0	1	0	0
ACOT9	5	7	12	6	1	0	0	1	12	16	0	8	0	2	4	2
ACP6	1	1	2	0	0	0	0	0	14	12	0	1	1	2	2	1
ACTA1	0	0	1	1	0	0	0	0	34	25	9	19	6	10	4	8
ACTG2	0	2	1	2	0	0	0	0	22	26	11	19	6	15	6	4
ACTL6A	33	25	80	18	1	2	5	2	50	18	15	9	9	4	18	11
ACTN1	42	61	83	57	2	4	2	3	162	132	35	94	55	88	52	36
ACTN4	18	24	41	24	1	2	0	0	47	57	23	24	17	33	16	26
ACTR10	11	20	27	14	0	0	0	2	32	35	4	13	0	2	4	12
ACTR1A	5	16	19	7	1	1	2	2	9	24	3	10	0	2	1	4
ACTR1B	8	2	8	5	0	0	0	0	17	15	2	13	0	4	9	6
ACTR2	6	15	10	8	3	0	4	1	43	31	10	17	17	18	35	18
ACTR3	32	31	57	26	2	2	8	2	43	36	5	16	4	6	5	10
ACTR6	12	4	17	3	1	0	1	3	27	8	6	4	2	4	11	9
ACVR2A	11	13	12	13	0	2	1	1	4	2	2	0	0	1	3	5
ACSL3	23	27	19	14	71	32	56	68	20	15	8	10	3	21	19	22
ACSL5	1	2	3	1	1	0	0	0	122	109	30	45	18	16	22	32
ADAM15	13	17	14	10	0	0	0	1	7	3	1	5	0	0	0	0
ADAM9	11	10	22	7	5	1	2	1	21	8	4	14	2	9	6	16
ADAMTS1	3	1	5	1	0	1	0	0	68	53	8	38	3	9	20	39
ADAP2	0	0	0	0	0	0	0	0	15	13	0	5	0	3	2	4
ADCK1	7	3	11	9	1	0	1	4	1	0	0	1	0	0	0	0
ADCK2	0	5	4	0	0	0	0	0	8	12	0	6	3	4	1	4
ADD1	8	8	8	10	0	2	0	1	5	5	0	4	0	0	0	1
ADGRE5	4	4	9	4	0	0	0	0	8	12	0	6	1	1	2	3
ADGRG1	0	0	0	0	0	0	0	0	20	19	3	9	2	0	1	5
ADGRG6	0	0	0	0	0	0	0	0	12	15	5	16	0	5	10	9
ADGRL2	1	2	0	1	0	0	0	0	24	19	11	21	17	14	6	10
ADH5	69	87	87	30	17	4	23	39	86	69	13	25	7	13	13	16
ADI1	21	25	40	9	0	1	0	1	2	2	1	1	0	1	2	0
ADIPOR1	7	11	17	13	1	0	0	1	21	23	6	15	1	8	6	17
ADIPOR2	8	9	8	5	0	2	3	6	33	50	10	14	4	19	19	11
ADK	6	17	17	11	0	2	2	4	10	12	2	12	2	0	5	6
ADM	18	18	17	14	0	1	0	0	0	0	0	0	0	0	0	2
ADORA2B	8	16	10	3	0	0	0	0	1	0	0	0	0	0	0	1
ADPRS	4	6	10	3	0	0	0	0	18	11	2	3	0	3	5	2
ADRA1A	7	23	19	12	1	0	2	2	0	0	0	0	0	0	0	0
ADRM1	46	57	98	47	2	1	2	2	44	80	10	22	3	6	24	27
ADSL	15	13	28	16	1	0	0	0	15	11	2	4	2	4	3	9
AEN	1	1	0	1	3	0	1	0	4	2	3	0	1	2	10	11
AFAP1	0	0	1	0	11	4	29	23	0	0	1	0	0	0	1	0
AFDN	1	2	1	0	0	0	0	0	15	9	1	7	3	7	2	5
AFF1	1	0	0	0	1	0	4	2	0	2	1	2	0	12	4	10
AFF4	2	3	4	3	4	0	3	5	6	4	1	5	0	5	7	10
AFG1L	1	0	1	1	0	0	1	0	7	11	1	3	0	2	1	2
AFG3L2	64	78	66	57	0	2	4	2	215	221	31	61	12	32	19	12
AGA	10	10	11	8	0	0	0	0	15	23	2	11	2	5	1	4
AGAP2	3	10	1	2	0	0	0	0	0	0	0	0	0	0	0	0
AGBL2	0	0	0	0	0	0	1	0	22	24	1	5	2	4	4	4
AGGF1	5	5	4	6	0	0	0	0	17	16	0	7	2	7	5	10
AGK	64	86	75	73	38	45	61	69	7	6	3	7	0	0	0	1
AGL	3	11	12	8	21	19	51	45	5	9	1	2	4	3	3	5
AGPAT1	5	5	6	3	0	0	0	0	17	12	5	8	3	7	1	3
AGPAT2	5	4	3	3	0	0	0	0	17	12	2	5	1	3	1	5
AGPAT5	7	22	14	16	1	1	4	0	27	16	0	8	10	10	11	7
AGPS	5	12	11	9	1	0	1	0	25	21	8	8	9	14	6	4
AGTRAP	20	24	15	10	2	2	0	2	30	35	2	9	0	1	1	3
AHCTF1	13	12	17	6	4	2	2	1	46	36	22	22	81	56	71	35
AHCY	13	16	16	7	0	1	1	0	100	110	8	51	1	16	22	26
AHCYL1	10	12	10	7	2	0	0	1	0	2	0	1	0	2	3	0
AHI1	5	10	11	5	1	1	0	1	3	2	1	1	1	0	1	3
AHNAK	17	10	15	7	2	1	0	0	9	13	1	6	2	1	4	0
AHSA1	4	5	9	1	0	0	0	0	10	9	1	3	0	1	3	1
AIDA	1	1	2	3	0	2	1	0	11	10	2	6	0	1	2	6
AIFM1	8	20	18	7	0	0	1	0	75	56	15	27	4	12	8	8
AIFM2	1	1	3	1	0	0	0	1	13	12	1	6	0	1	0	2
AIG1	13	12	6	13	0	0	0	1	17	16	2	8	1	6	2	3
AIMP1	16	8	13	9	2	2	2	1	54	41	5	21	7	22	17	16
AIMP2	72	142	148	177	4	2	2	2	9	20	1	3	3	1	1	4
AIP	12	13	20	7	0	0	1	0	41	41	4	14	0	7	2	5
AK1	16	19	12	13	1	0	1	0	13	23	2	8	1	5	7	6
AK3	4	10	11	6	0	2	0	2	31	34	12	13	6	12	12	3
AKAP12	1	0	0	1	0	0	0	0	37	28	7	15	10	5	13	15
AKAP13	3	2	7	6	0	0	2	0	16	25	11	25	8	24	21	8
AKAP8L	0	2	0	0	0	1	2	2	4	8	2	6	7	16	23	23
AKAP9	175	263	177	186	24	14	20	27	127	119	41	73	83	146	70	61
AKIP1	7	13	17	8	0	0	0	0	33	64	8	7	4	2	8	6
AKIRIN1	4	10	5	3	0	0	0	0	6	2	0	0	3	4	2	5
AKIRIN2	35	67	25	24	13	10	28	17	23	31	20	33	44	100	143	121
AKR1A1	19	23	26	12	0	0	0	2	16	26	3	9	0	3	2	4
AKR1B1	79	121	165	101	11	4	8	11	1467	1754	255	843	86	366	265	380
AKR1C3	87	129	76	36	0	1	1	1	79	125	15	53	5	18	10	18
AKR7L	1	0	0	0	0	0	0	0	23	25	4	11	3	2	7	6
AKT1S1	2	9	2	2	0	0	0	0	8	9	1	10	2	4	4	6
AKT2	2	7	6	4	0	0	0	0	11	7	1	3	1	1	0	2
ALAS1	5	5	18	2	0	0	2	1	6	10	1	8	1	4	16	20
ALCAM	2	8	5	9	0	0	1	0	10	11	2	10	2	12	23	8
ALDH1A1	3	5	1	0	0	0	0	0	54	71	18	36	9	33	24	35
ALDH3A1	153	256	209	116	4	4	2	5	1	7	0	1	1	0	1	1
ALDH3A2	69	91	75	60	3	0	0	3	7	22	4	8	0	5	3	7
ALDH4A1	0	2	0	1	1	0	0	0	13	10	1	4	1	9	3	3
ALDH7A1	71	109	41	48	1	4	2	1	135	108	27	68	36	47	31	23
ALG1	16	12	28	9	1	0	0	0	4	2	1	0	0	2	1	1
ALG12	12	13	6	2	0	0	0	0	6	5	1	3	0	2	0	1
ALG3	46	61	76	49	0	1	1	0	57	44	7	12	1	10	1	5
ALG5	20	25	30	12	7	1	2	2	13	12	1	2	1	4	7	3
ALG6	4	6	10	2	0	0	0	1	3	5	0	2	0	1	0	0
ALG8	4	11	10	9	0	0	1	0	8	9	1	2	2	0	0	2
ALKBH3	4	3	3	1	0	0	0	0	10	17	3	7	1	3	2	4
ALKBH7	57	50	41	19	0	0	0	0	229	281	21	77	16	51	80	34
ALKBH8	7	14	7	7	0	2	0	0	13	11	2	7	4	1	7	2
ALPK2	6	3	4	2	1	0	0	4	19	16	2	9	3	1	0	1
ALYREF	3	3	5	0	0	0	0	0	12	5	2	4	0	1	2	5
AMACR	0	1	1	2	0	0	0	0	22	15	1	5	0	2	6	1
AMD1	3	11	3	8	1	0	0	0	5	6	0	9	0	0	4	5
AMZ2	30	30	29	14	0	0	0	1	17	29	3	8	3	10	12	11
ANAPC1	0	3	1	3	1	0	1	2	13	13	5	7	0	3	6	6
ANAPC13	10	25	37	12	1	0	1	1	20	21	0	15	2	9	6	8
ANAPC15	8	10	11	3	0	0	0	0	6	6	0	5	1	1	1	2
ANAPC16	13	31	11	8	2	0	1	1	24	32	3	12	3	12	8	11
ANAPC4	4	0	0	0	0	0	1	0	14	11	1	1	2	3	3	11
ANAPC5	28	40	28	18	2	0	1	1	23	30	9	12	4	11	10	13
ANAPC7	5	12	18	10	1	1	0	0	8	8	0	5	2	4	1	0
ANGEL2	2	1	2	3	1	1	0	0	4	2	2	6	8	11	8	4
ANGPT1	4	12	8	4	0	1	0	0	0	0	0	0	0	0	0	0
ANKH	2	2	3	2	0	0	0	0	42	27	2	11	4	3	4	5
ANKIB1	10	6	7	12	0	0	0	0	8	11	0	3	0	3	1	3
ANKLE2	5	9	5	4	1	0	0	5	17	15	2	9	1	5	3	3
ANKRA2	9	3	2	3	1	5	4	0	13	8	3	6	1	6	11	16
ANKRD10	18	29	8	20	2	2	1	0	20	18	8	21	3	9	2	7
ANKRD11	79	70	66	32	7	5	10	4	41	15	3	21	19	33	21	18
ANKRD12	73	92	46	32	22	6	13	10	120	54	55	52	243	208	199	83
ANKRD17	83	89	52	78	29	12	49	45	136	135	57	97	177	274	169	113
ANKRD18B	0	0	2	1	0	0	1	1	91	81	26	37	34	37	16	14
ANKRD26	10	14	18	23	4	1	1	2	147	107	42	84	191	170	142	75
ANKRD28	13	33	7	12	10	11	8	8	28	23	10	41	10	17	18	36
ANKRD30B	0	0	0	1	0	0	0	0	19	8	14	26	7	11	9	17
ANKRD39	3	1	5	2	0	0	0	0	21	32	2	13	3	8	5	5
ANKRD42	1	4	2	1	0	0	1	0	13	2	2	2	2	4	2	1
ANKZF1	1	2	3	1	0	0	0	0	12	6	1	9	3	6	6	8
ANLN	9	4	7	5	2	0	0	1	12	11	5	7	0	1	1	4
ANO10	9	5	9	5	3	0	0	0	54	55	2	17	1	6	6	6
ANP32A	5	15	7	4	1	0	0	0	15	13	0	3	0	0	1	3
ANP32B	9	16	25	18	1	1	2	1	37	52	2	18	14	20	14	19
ANP32E	3	4	6	3	0	0	1	0	40	34	4	21	7	8	15	26
ANXA1	119	155	250	144	22	23	45	41	432	460	108	238	134	210	197	209
ANXA11	22	44	37	15	0	0	2	2	66	53	13	22	2	10	9	12
ANXA4	34	56	54	40	6	1	1	2	162	184	49	97	5	57	45	55
ANXA5	32	47	73	40	3	2	3	4	139	118	50	95	8	28	65	68
ANXA6	21	40	37	23	2	1	0	0	28	25	4	10	2	11	3	4
ANXA7	10	9	30	14	1	2	1	1	70	57	14	33	6	23	9	22
AOPEP	13	8	8	9	0	0	1	1	0	0	0	1	1	0	0	4
AOX1	0	0	0	0	0	0	0	0	14	10	2	4	1	4	1	2
AP1B1	6	9	10	4	3	1	4	1	9	11	3	4	0	2	2	6
AP1M1	3	1	15	1	0	0	0	0	20	21	2	4	0	0	4	4
AP1M2	1	1	2	0	0	0	0	0	4	13	2	4	1	1	3	5
AP1S1	5	21	19	11	1	0	0	0	131	178	27	74	7	18	22	34
AP2A1	10	11	17	5	0	0	0	0	6	5	1	3	2	3	1	4
AP2A2	5	9	12	2	2	0	0	1	5	14	1	4	0	2	3	2
AP2B1	1	7	1	6	0	0	0	0	28	38	5	24	1	13	9	10
AP2M1	45	95	91	61	2	0	2	0	57	103	18	45	10	20	10	15
AP3B1	9	5	15	7	0	1	3	2	6	7	0	5	0	3	0	1
AP3D1	4	6	10	6	0	3	4	0	37	41	7	15	4	12	14	30
AP3M1	0	1	3	1	0	0	1	0	4	10	1	1	0	1	2	0
AP3S1	10	13	18	9	0	1	0	0	17	27	4	11	3	2	6	11
APBA3	1	1	1	1	0	0	0	1	11	8	2	1	2	2	2	2
APBB1	3	2	2	1	0	0	0	0	19	18	1	14	4	7	5	8
APBB2	1	1	0	1	0	0	1	0	3	3	5	6	0	3	11	3
APC	4	8	7	4	0	0	0	1	16	9	5	3	7	3	17	8
APEH	17	30	23	12	0	0	2	1	8	13	0	4	0	2	0	4
APEX2	1	4	3	6	0	0	0	0	10	4	0	1	0	0	0	1
APH1A	17	19	17	11	1	2	1	0	19	16	3	4	5	5	2	5
APH1B	3	5	0	3	0	0	0	0	25	15	1	3	0	2	1	1
APIP	12	7	7	9	0	1	0	0	10	11	2	5	2	0	2	5
APLP2	12	34	33	22	0	1	2	1	105	86	19	53	11	48	55	46
APOBEC3C	15	7	12	10	1	0	0	0	17	25	2	9	1	4	5	5
APOBEC3G	19	9	24	22	2	3	4	1	20	23	6	8	0	2	6	5
APOBEC3H	0	0	0	0	0	0	0	0	9	12	0	5	1	4	6	3
APOE	0	2	0	1	0	0	2	1	128	174	42	97	38	135	113	93
APOO	2	7	10	4	1	0	1	0	10	15	3	3	0	2	2	0
APP	7	23	22	9	5	1	9	8	16	10	7	11	1	4	9	15
APPBP2	2	1	6	2	0	0	0	3	9	12	3	8	1	7	11	4
APPL1	8	8	5	4	0	0	2	0	11	16	4	3	1	5	2	2
APRT	43	49	78	42	3	2	4	1	44	43	14	13	1	4	14	21
ARCN1	5	13	8	1	1	0	1	4	13	7	1	3	3	4	6	12
AREG	0	0	0	0	0	0	0	0	45	27	9	1	8	5	2	7
ARF1	70	104	155	42	4	2	2	5	107	100	16	40	1	20	45	51
ARF4	37	49	71	37	3	2	13	9	58	61	6	24	12	23	14	27
ARF5	42	62	64	36	5	2	1	3	36	46	3	13	2	14	19	14
ARFGAP3	8	11	12	9	0	0	1	0	13	10	3	7	0	2	1	1
ARFIP2	13	6	14	14	2	0	1	5	10	15	1	3	0	1	5	5
ARFRP1	3	5	10	4	1	0	0	0	2	4	0	0	0	0	0	0
ARG2	2	6	3	1	0	0	0	0	18	22	1	9	6	4	4	8
ARGLU1	22	32	19	7	0	0	2	1	6	9	1	2	3	5	24	24
ARHGAP10	1	1	0	1	0	0	0	0	6	12	1	1	0	0	1	0
ARHGAP11A	10	12	10	15	0	0	2	0	0	0	0	1	0	0	1	1
ARHGAP18	15	24	18	15	5	0	2	3	65	30	5	16	5	34	33	27
ARHGAP21	10	29	15	12	1	1	1	0	32	23	5	9	3	16	8	9
ARHGAP29	6	12	5	3	0	0	0	1	63	74	19	47	5	16	11	12
ARHGAP5	13	33	8	9	2	1	1	0	20	24	10	10	46	30	8	8
ARHGDIA	18	16	26	8	0	0	0	0	39	42	4	8	0	3	7	10
ARHGEF11	1	2	1	0	0	0	3	0	10	8	1	7	0	4	2	7
ARHGEF28	6	6	4	3	5	4	3	4	49	45	21	33	47	94	58	34
ARID4A	3	8	8	6	0	0	0	0	16	8	5	1	13	5	12	6
ARID4B	207	188	204	109	128	51	197	130	694	398	340	359	5077	2192	1728	566
ARID5B	12	19	6	3	5	2	4	3	19	16	8	23	3	13	7	11
ARIH2	8	7	5	3	0	0	1	0	17	20	3	11	1	15	16	31
ARL1	10	12	22	5	0	0	1	1	19	28	3	9	2	5	7	8
ARL13B	5	5	6	5	0	1	2	0	13	12	7	10	3	5	5	8
ARL14EP	2	6	7	6	1	3	3	3	12	5	5	8	3	11	5	12
ARL16	13	16	8	5	1	0	2	0	5	6	1	1	0	0	1	2
ARL2	11	21	11	10	0	0	0	1	63	51	16	31	8	27	22	31
ARL2BP	5	13	9	4	1	0	0	0	20	23	3	8	0	2	3	8
ARL3	5	13	11	6	0	0	0	0	25	24	4	8	1	6	2	8
ARL6IP4	24	44	36	24	6	0	1	0	34	33	1	16	2	6	9	9
ARL6IP5	16	27	32	12	2	2	0	0	51	52	15	41	3	18	16	34
ARL6IP6	3	3	5	3	0	0	0	0	19	14	1	5	0	1	1	0
ARL8B	22	28	21	12	6	1	6	2	65	43	15	26	32	31	35	24
ARMC2	2	0	0	2	1	0	0	0	16	8	2	6	5	5	7	0
ARMC9	11	8	22	13	2	1	3	4	6	8	1	3	1	2	2	0
ARMCX3	8	7	16	6	1	1	3	2	20	12	5	1	3	6	10	6
ARMT1	5	9	2	3	0	0	0	0	24	23	8	15	5	11	17	9
ARNT	8	11	10	7	0	1	2	3	31	18	3	11	0	2	3	6
ARNTL2	9	7	24	19	9	7	6	6	291	253	100	157	305	266	163	79
ARPC1B	12	21	29	17	3	3	0	3	96	123	10	44	9	19	42	38
ARPC2	38	89	108	48	7	2	1	4	143	191	16	64	8	52	25	37
ARPC4	12	11	12	12	1	0	1	1	19	42	3	17	2	2	3	8
ARPC5	17	29	54	11	0	3	0	1	32	54	1	8	1	1	6	2
ARPC5L	37	34	47	26	0	0	2	2	18	13	2	4	4	3	3	6
ARPP19	3	5	5	0	0	0	1	0	19	17	7	6	8	12	20	18
ARRDC3	0	2	4	1	2	3	8	3	0	0	2	11	0	3	8	15
ARSA	8	11	18	7	0	0	0	1	4	3	0	2	0	3	0	0
ARSJ	6	5	12	4	1	2	1	0	38	31	6	10	5	8	3	14
ASAH1	12	13	20	2	0	0	1	1	27	25	14	26	12	19	11	23
ASAP1	8	16	12	15	1	4	12	12	20	10	1	8	13	10	8	3
ASB3	10	11	7	6	2	3	1	4	18	13	1	5	3	6	2	1
ASB8	4	2	2	2	1	0	0	0	12	11	2	4	4	3	3	1
ASCC1	3	1	4	4	1	0	2	0	6	11	0	2	0	0	3	0
ASCC2	6	11	26	8	2	0	2	2	15	25	4	10	7	13	11	24
ASCC3	4	5	11	4	1	2	2	2	24	16	12	23	16	21	26	19
ASH1L	3	5	0	2	2	2	10	4	3	4	3	3	2	3	3	3
ASH2L	10	3	9	4	0	0	0	0	5	6	0	4	0	5	0	0
ASL	3	11	11	4	1	0	0	0	6	10	3	6	1	0	2	1
ASMTL	15	24	34	19	2	1	25	28	15	7	4	8	1	2	1	2
ASNS	14	26	17	13	0	1	1	2	65	73	17	39	41	64	20	8
ASPH	69	118	137	94	1	3	2	1	14	12	5	14	4	4	2	7
ASPM	13	19	16	6	2	0	1	1	11	15	2	6	2	2	2	2
ASRGL1	0	0	1	0	0	0	0	0	25	19	2	9	0	2	1	3
ASXL1	17	14	17	8	0	3	2	1	8	5	2	6	0	5	2	5
ATAD2	2	3	7	4	0	1	1	1	6	10	1	4	0	1	1	4
ATF3	6	3	3	1	29	39	28	32	1	3	0	1	0	14	9	22
ATF4	19	17	15	9	0	2	1	3	39	63	9	12	25	40	45	57
ATF5	6	11	11	4	0	0	0	0	6	12	0	1	0	1	2	0
ATF6	4	11	5	6	0	1	0	3	19	26	5	9	1	18	14	12
ATF7IP	6	4	5	4	1	3	4	1	13	6	7	9	23	16	22	10
ATF7IP2	0	0	0	0	0	1	0	0	7	9	2	12	2	6	1	2
ATG101	11	9	8	7	0	0	0	0	11	14	1	2	0	0	5	3
ATG12	7	12	7	5	0	0	0	2	22	16	1	8	2	5	4	4
ATG13	4	4	13	2	0	1	2	2	0	2	0	0	0	0	2	0
ATG14	0	1	1	0	1	0	1	0	2	2	0	2	2	7	4	10
ATG3	11	27	22	8	0	2	0	3	31	20	4	8	17	22	42	42
ATG4B	11	8	15	3	0	1	2	0	17	8	1	4	0	5	3	8
ATG4C	6	6	5	1	0	0	1	1	28	16	5	1	0	3	6	3
ATG5	4	5	3	2	0	0	0	0	38	23	4	7	2	3	4	7
ATG9A	5	11	12	5	0	0	0	0	3	3	3	0	0	0	0	3
ATL2	16	19	8	7	0	0	2	0	2	3	0	1	0	1	1	0
ATL3	7	2	13	2	0	0	0	0	20	21	6	8	0	0	2	2
ATN1	8	13	14	8	0	0	0	0	25	21	2	7	6	3	3	4
ATP11C	15	12	14	16	1	0	0	0	7	11	2	2	3	4	2	1
ATP13A1	5	1	5	3	1	0	0	0	13	8	6	10	5	6	2	5
ATP13A3	13	17	11	8	5	1	2	2	5	3	3	11	2	7	4	2
ATP1A1	26	51	44	29	3	3	0	1	25	39	12	21	2	24	8	13
ATP1B1	5	7	3	3	0	0	0	0	23	31	0	5	0	3	5	4
ATP1B3	42	56	89	39	2	0	2	1	5	16	3	4	2	1	6	1
ATP23	2	3	4	0	0	0	0	0	7	10	0	5	1	4	6	7
ATP2A2	8	13	4	6	0	0	1	0	19	10	2	6	5	9	2	1
ATP2B1	144	155	119	79	14	6	14	11	1324	928	174	375	843	610	346	221
ATP5F1A	389	484	587	296	15	11	13	15	1544	1330	336	681	459	682	450	324
ATP5F1B	91	114	139	74	4	7	6	4	620	657	202	289	101	238	232	198
ATP5F1C	160	171	249	93	1	1	6	4	376	334	54	116	36	48	54	42
ATP5F1D	38	62	67	23	4	1	1	2	75	106	13	34	13	24	8	3
ATP5F1E	202	303	215	154	17	13	6	8	225	321	41	104	15	85	109	91
ATP5MC1	28	43	40	18	1	1	1	0	58	97	10	36	1	9	6	2
ATP5MC2	84	116	115	77	0	2	2	2	247	250	55	129	36	63	27	18
ATP5MD	75	126	113	53	4	2	7	4	192	257	31	69	23	51	25	17
ATP5ME	38	51	48	20	5	1	0	0	54	56	1	27	2	7	5	5
ATP5MPL	10	24	24	9	1	0	1	2	140	147	26	65	6	35	31	39
ATP5PB	89	99	157	59	10	5	15	9	160	170	35	73	22	60	51	60
ATP5PF	39	54	36	24	1	1	3	1	51	53	7	19	1	7	9	8
ATP6AP1	8	10	6	10	1	0	0	0	7	24	7	14	3	9	21	17
ATP6AP2	23	22	35	22	3	0	0	1	39	45	10	29	1	12	13	19
ATP6V0B	98	138	144	76	9	4	5	5	114	136	17	56	30	61	42	62
ATP6V0C	54	90	83	40	1	3	2	0	188	224	28	110	22	65	59	49
ATP6V0D1	11	19	30	21	3	0	2	3	23	25	6	13	1	13	16	19
ATP6V0E1	34	51	59	22	4	3	5	3	68	71	10	20	2	9	9	8
ATP6V1B2	5	9	10	8	2	0	1	4	112	128	18	32	52	64	106	97
ATP6V1C1	7	10	3	2	1	0	11	5	7	6	2	4	2	3	12	22
ATP6V1E1	3	13	14	4	1	0	0	1	16	8	2	3	0	1	3	4
ATP6V1F	16	40	29	15	1	3	0	0	78	100	6	34	5	23	26	34
ATP6V1G1	23	23	45	19	3	0	2	1	66	76	16	38	31	36	76	65
ATP6V1H	32	42	36	38	3	7	11	16	28	45	12	26	13	51	135	123
ATR	4	8	14	8	1	2	3	0	12	8	2	7	4	8	3	3
ATRAID	13	18	11	14	0	0	0	0	21	30	4	5	1	8	5	11
ATRX	2011	2168	1209	1213	268	99	336	277	747	643	271	471	1492	1170	474	253
ATXN10	19	24	34	21	4	0	0	1	26	43	3	14	0	3	4	2
AUP1	24	42	45	35	1	2	2	2	21	36	7	14	4	7	27	23
AURKA	6	7	6	6	0	1	0	1	12	7	2	7	1	1	2	6
AURKAIP1	21	37	43	18	0	1	1	0	7	17	1	3	1	3	4	3
AURKB	1	1	4	3	0	0	0	1	13	11	0	2	1	0	0	0
AVL9	15	15	14	4	8	4	21	10	2	3	0	0	0	0	0	0
AZI2	7	17	15	7	2	1	1	3	10	15	7	6	0	7	20	12
AZIN1	7	17	10	11	2	2	5	3	8	5	4	7	6	10	8	10
B2M	292	374	471	180	132	66	202	127	247	159	104	88	210	111	445	210
B3GAT3	6	19	17	4	1	0	0	0	12	14	4	1	1	9	3	3
B3GNTL1	10	12	9	5	0	0	0	1	13	10	2	6	3	2	0	5
B4GALT3	3	4	11	4	0	0	0	1	9	15	1	3	1	6	9	18
B4GALT7	8	15	12	11	0	0	0	0	12	20	2	4	0	2	1	2
B9D1	5	16	12	8	0	1	1	0	12	20	7	5	6	4	3	1
BABAM1	21	10	23	18	0	0	1	0	20	28	6	7	1	5	6	9
BABAM2	17	22	16	15	0	0	1	1	27	24	8	13	3	7	4	5
BACE2	8	3	4	4	0	0	0	0	17	6	0	3	3	1	0	0
BAD	14	14	24	4	0	0	1	0	13	14	3	6	0	2	6	4
BAG1	0	1	1	4	0	1	0	1	4	10	3	3	6	7	6	10
BAG2	4	6	14	3	0	0	1	0	10	3	2	2	3	3	3	10
BAMBI	37	23	31	11	78	26	73	61	0	1	0	0	0	0	0	2
BANF1	28	33	37	24	0	0	2	0	76	78	14	33	2	16	15	10
BAP1	10	6	16	8	0	0	0	3	7	3	3	3	3	5	4	2
BARD1	1	3	10	5	0	0	0	0	3	4	0	2	0	2	1	1
BASP1	3	8	5	1	1	0	0	0	21	13	0	3	0	0	2	4
BAX	5	6	7	3	0	0	1	0	6	12	5	8	1	6	3	7
BAZ1A	2	2	6	7	1	1	1	0	14	13	2	7	16	17	24	26
BAZ1B	11	16	11	7	0	0	1	2	33	28	12	12	28	32	38	25
BAZ2B	6	3	7	5	1	2	3	3	13	9	7	7	9	12	12	11
BBS2	32	24	28	32	1	2	0	0	37	34	11	19	5	21	3	2
BBX	5	11	5	6	0	0	1	0	12	12	1	4	3	9	2	8
BCAM	1	3	10	2	0	0	0	1	4	6	2	3	1	1	5	3
BCAN	0	0	0	0	1	0	0	0	9	11	1	1	1	2	3	0
BCAP29	1	7	12	7	0	0	0	0	8	8	4	5	1	3	0	5
BCAP31	62	76	95	60	4	3	2	4	146	222	27	91	28	66	51	58
BCAR1	5	8	4	1	0	0	0	1	17	9	0	3	0	0	3	2
BCAS2	5	8	7	1	0	0	2	0	14	15	1	6	0	2	6	4
BCAT2	6	9	9	6	1	0	0	1	14	15	5	12	0	4	4	8
BCCIP	3	11	8	5	0	1	1	2	16	18	1	6	1	9	5	11
BCKDHB	4	4	6	2	0	0	0	0	14	7	4	2	2	2	0	2
BCKDK	11	14	27	9	3	0	1	0	52	52	5	31	0	11	13	23
BCL10	2	3	1	0	5	1	4	2	3	5	3	1	4	15	8	23
BCL2L1	9	12	12	7	0	0	0	0	17	24	2	1	0	2	0	5
BCL2L13	10	14	4	6	0	0	2	3	1	3	0	4	0	1	0	1
BCL7B	13	18	16	7	4	9	8	1	1	12	1	0	0	2	0	4
BCLAF1	23	18	15	29	5	3	2	10	46	35	22	40	49	76	122	81
BDH2	1	2	4	1	0	0	0	0	21	36	3	11	7	9	13	12
BDP1	16	26	19	15	2	1	8	6	32	31	5	23	50	42	25	18
BECN1	8	17	15	11	2	0	0	0	18	30	3	8	2	5	10	8
BEND5	1	0	1	1	0	0	0	1	6	12	4	4	23	16	29	17
BET1	11	8	11	5	7	0	1	1	5	11	1	4	0	1	5	5
BET1L	4	7	26	10	2	0	0	2	10	18	1	6	0	0	1	2
BEX1	0	0	0	0	0	0	0	0	49	32	5	17	4	7	8	10
BEX2	0	0	0	0	0	0	0	0	26	35	2	11	0	1	11	12
BEX3	51	69	83	34	1	0	1	1	134	155	17	60	14	23	26	18
BEX4	0	1	0	0	0	0	0	0	16	23	0	3	0	0	3	5
BFAR	11	4	6	6	0	0	0	1	24	15	4	6	3	2	6	15
BHLHE40	1	3	2	1	0	0	0	0	5	2	2	7	4	3	11	26
BICD1	12	12	6	2	0	0	0	0	2	3	0	2	0	0	0	1
BID	11	15	18	11	1	0	1	0	27	25	0	6	1	5	6	4
BIN1	7	13	3	4	0	0	1	0	8	10	1	4	2	0	1	5
BIRC3	3	0	5	4	22	14	29	15	12	8	1	4	5	16	14	37
BLCAP	7	4	12	4	0	0	0	0	4	3	0	0	0	2	0	0
BLMH	8	14	7	6	0	0	1	0	11	10	0	4	2	5	4	7
BLOC1S1	7	10	13	7	0	0	0	0	44	68	11	19	8	26	12	24
BLOC1S2	4	7	14	2	1	0	0	1	26	33	9	11	7	9	28	32
BLVRA	24	19	31	13	3	0	2	1	55	54	5	21	4	4	3	4
BLVRB	48	51	66	16	1	2	0	0	35	32	6	15	1	2	1	4
BMERB1	5	3	11	5	1	0	0	0	0	0	0	0	0	0	0	0
BMP1	2	6	7	4	0	0	1	0	15	18	3	13	3	5	7	8
BMP2K	3	4	1	1	0	1	0	0	13	5	3	5	2	4	4	3
BMPR2	4	8	4	0	0	0	0	0	39	32	6	22	12	15	6	4
BMS1	7	13	17	20	1	1	2	3	42	28	20	19	25	27	60	32
BNIP1	2	7	8	4	0	0	0	0	5	12	0	4	0	2	1	3
BNIP2	7	12	6	2	0	1	1	2	2	6	0	0	3	2	7	2
BNIP3	91	125	53	37	40	19	89	85	53	60	11	21	3	14	11	11
BNIP3L	12	33	17	8	1	1	0	1	33	47	9	13	1	6	2	6
BOD1L1	35	36	35	24	6	2	1	3	1	3	1	1	1	4	2	1
BOLA3	9	9	14	6	1	1	0	2	24	37	4	13	0	14	15	7
BPGM	8	14	12	3	1	0	0	0	20	28	2	8	2	3	4	6
BPHL	2	9	9	5	0	0	0	0	13	10	2	4	0	2	1	14
BPTF	8	22	3	13	0	5	2	0	56	27	10	23	8	25	11	11
BRAP	2	6	2	3	0	0	0	1	10	10	0	11	1	5	8	10
BRAT1	6	14	10	8	1	0	0	3	1	5	1	3	0	1	0	1
BRD2	71	54	71	43	3	3	8	7	157	121	41	91	82	145	205	366
BRD3	5	4	1	2	0	0	1	0	11	10	1	5	2	8	5	8
BRD4	5	5	7	1	1	3	7	7	19	18	3	12	7	23	16	20
BRD7	5	6	8	2	0	1	0	0	10	13	4	4	3	4	3	4
BRD8	29	19	43	28	9	12	12	19	123	47	88	101	151	189	790	396
BRD9	2	3	4	1	0	0	1	0	21	18	5	4	7	3	3	2
BRI3	4	7	6	1	1	0	0	0	27	31	3	12	9	10	4	3
BRIX1	37	20	31	15	2	1	6	4	25	21	6	11	34	19	67	39
BRMS1	4	4	12	5	0	0	0	0	4	8	0	3	0	0	2	3
BRWD1	3	6	2	2	0	0	0	3	6	13	2	9	0	4	7	9
BSCL2	12	23	30	14	2	0	1	1	16	20	3	10	0	1	4	7
BSG	62	63	96	46	9	4	1	0	96	92	7	58	4	16	13	35
BST2	13	20	30	13	7	0	6	3	2	1	0	1	2	2	0	4
BTBD1	2	5	1	2	0	0	1	1	15	16	6	9	4	7	16	7
BTF3	118	151	178	115	17	10	18	16	136	215	34	100	54	92	107	89
BTF3L4	13	27	28	22	2	1	2	1	38	31	11	14	6	11	11	4
BTG3	40	40	47	26	3	6	2	6	125	123	23	55	4	28	28	49
BUB1	1	5	3	1	1	0	2	3	21	22	6	19	5	14	7	7
BUB3	5	8	12	6	0	0	0	1	12	27	1	8	0	1	1	3
BUD23	19	19	27	9	1	0	1	1	46	58	10	22	3	5	4	3
BUD31	16	18	22	17	3	1	4	4	23	42	5	11	0	11	14	26
BYSL	12	11	12	7	1	0	1	1	17	7	0	3	0	5	8	3
BZW1	18	31	21	13	3	0	3	2	28	44	10	22	19	33	42	50
BZW2	13	22	27	10	0	1	0	0	17	31	3	14	1	3	3	7
C11orf49	8	9	2	5	0	0	1	1	11	14	0	4	0	0	6	8
C11orf58	65	61	77	46	11	7	18	11	119	85	14	33	9	18	45	48
C11orf71	3	3	5	2	0	0	0	0	5	13	1	2	0	0	0	0
C12orf10	12	20	15	7	1	0	1	0	23	9	1	9	3	7	2	3
C12orf29	5	7	8	5	0	0	1	0	11	7	1	2	7	14	6	3
C12orf45	5	10	8	5	1	0	0	2	28	22	1	0	1	5	1	1
C12orf57	20	26	25	15	1	0	2	2	79	81	13	42	21	58	39	26
C12orf75	7	5	19	11	6	3	4	2	292	373	54	164	22	80	106	149
C15orf61	4	5	0	1	0	0	0	0	9	13	0	1	0	0	1	1
C17orf64	0	0	0	1	0	0	0	0	24	15	3	12	6	8	10	12
C17orf98	0	0	0	0	0	0	0	0	5	13	1	10	2	3	15	7
C19orf48	5	12	15	10	0	0	0	0	8	11	3	0	0	0	2	1
C19orf53	33	41	50	24	0	1	0	0	46	50	6	20	3	13	12	17
C1D	13	7	14	2	1	1	2	0	81	66	19	35	2	23	60	54
C1GALT1	6	4	15	2	3	1	0	1	163	66	35	20	53	39	38	10
C1GALT1C1	4	21	10	4	0	0	0	0	14	13	7	5	2	2	3	5
C1orf112	3	1	1	0	0	0	0	0	2	10	1	2	0	0	0	1
C1orf131	6	6	13	3	2	0	0	3	5	4	0	3	1	1	5	4
C1orf53	2	1	7	0	0	0	0	0	17	10	5	5	1	0	1	2
C1QBP	57	68	112	46	7	1	3	0	183	192	32	92	23	52	49	71
C1R	28	45	55	29	7	6	1	4	5	3	1	3	2	4	0	6
C1S	141	183	143	141	7	8	5	6	19	18	6	16	0	7	15	13
C20orf27	9	11	33	15	3	1	0	2	17	24	1	12	0	4	3	5
C22orf39	7	12	8	5	0	0	0	0	4	5	0	1	0	0	1	1
C2orf49	1	0	1	3	0	1	1	1	1	8	0	2	0	10	6	5
C3	2	2	1	1	0	0	5	5	84	85	32	74	40	73	52	66
C3orf14	0	0	0	0	0	0	0	0	5	14	1	2	0	0	0	2
C3orf38	0	0	2	1	1	2	1	1	4	2	1	2	0	1	11	6
C3orf49	76	90	74	87	8	7	18	16	0	0	0	0	0	0	0	0
C4orf3	14	30	20	8	1	0	0	2	31	38	5	19	0	3	3	6
C4orf48	25	26	33	11	1	1	1	0	24	32	5	9	0	10	9	8
C5orf15	15	21	31	20	17	16	25	29	15	24	2	10	1	11	5	9
C5orf51	1	2	2	1	0	0	0	1	17	19	3	2	2	10	28	19
C6orf136	2	2	2	0	1	1	0	0	14	9	1	3	2	3	1	4
C6orf62	446	594	539	876	42	59	70	55	90	59	17	38	16	27	39	32
C6orf89	2	5	11	2	0	0	0	0	17	32	2	4	1	1	2	3
C7orf50	18	30	50	16	1	1	0	0	36	48	0	12	0	1	5	3
C8orf33	11	9	11	5	0	0	0	2	6	11	1	4	1	3	1	4
C8orf76	4	11	10	1	1	1	2	3	12	14	0	4	0	6	2	2
C9orf78	3	4	2	3	1	0	0	0	12	15	0	4	0	1	4	1
C9orf85	18	16	15	10	3	5	3	3	2	2	0	0	0	2	0	1
CA12	12	17	9	4	0	0	0	0	5	4	0	1	0	1	0	3
CACYBP	144	191	241	115	6	4	5	6	437	381	73	156	83	59	59	55
CADM1	15	11	22	10	3	1	4	3	10	7	2	3	15	4	7	1
CADM3	0	0	0	0	1	0	0	0	29	42	4	22	6	9	5	7
CALCOCO2	22	43	27	31	4	6	8	14	23	17	5	14	3	5	1	6
CALD1	124	169	417	347	14	9	13	13	34	28	8	21	2	14	12	20
CALM1	68	125	96	59	4	3	10	9	230	220	57	102	200	133	119	77
CALM2	77	120	118	62	7	6	6	11	202	241	16	48	6	14	14	17
CALM3	16	28	28	10	1	0	3	1	36	53	7	32	4	12	16	24
CALR	48	104	62	54	2	1	2	4	155	244	31	84	8	82	44	118
CALU	38	53	64	35	1	0	1	1	25	22	9	10	4	16	8	7
CAMK2G	3	4	4	3	0	0	0	0	12	8	1	7	3	1	4	1
CAMLG	27	31	21	16	0	0	1	0	213	150	16	47	2	21	39	42
CAMSAP2	2	11	1	2	0	0	0	2	0	0	1	3	2	1	1	2
CAMTA1	41	32	56	26	1	0	1	1	2	0	1	0	0	1	2	0
CAND1	16	15	14	9	0	0	0	1	54	38	7	21	9	8	26	16
CANT1	6	7	10	5	2	0	5	5	6	5	0	1	0	3	4	8
CANX	52	109	60	75	4	1	5	8	117	182	24	73	38	93	47	74
CAP1	55	45	58	24	0	1	0	0	190	150	50	77	22	58	42	38
CAP2	13	27	16	9	0	0	1	0	2	1	0	1	0	0	1	0
CAPG	0	1	0	1	0	0	0	0	50	61	9	35	1	14	12	15
CAPN1	19	15	21	17	0	1	1	1	8	19	8	6	3	3	3	5
CAPN2	16	21	67	37	1	2	5	2	25	41	9	17	0	8	13	12
CAPNS1	9	14	11	7	1	0	1	0	42	47	7	22	2	22	25	15
CAPRIN1	13	28	29	17	1	0	4	2	19	26	4	12	7	12	15	18
CAPZA1	6	8	13	15	0	1	0	0	19	32	0	13	0	10	2	10
CAPZA2	23	31	46	22	1	1	2	4	57	78	13	30	3	10	24	54
CAPZB	51	59	60	27	2	1	2	4	70	87	16	47	5	28	14	30
CARD19	10	7	9	0	0	1	0	0	0	2	0	1	0	0	0	0
CARS1	13	16	18	14	3	0	5	2	23	25	10	8	14	35	64	39
CARS2	6	7	14	4	0	0	0	0	5	11	4	8	16	26	15	26
CASP4	36	40	31	33	0	2	1	4	3	3	0	1	1	0	1	1
CASP6	5	2	7	3	0	0	0	0	4	10	1	5	2	2	1	1
CASP8AP2	6	4	5	6	0	0	0	0	4	6	2	9	1	2	5	11
CASP9	2	0	0	1	0	0	0	0	6	12	0	4	0	1	0	0
CAST	12	32	22	12	2	0	3	3	375	270	58	118	24	97	98	70
CAT	9	15	14	6	0	0	0	0	22	15	5	17	0	2	6	8
CATSPERZ	0	0	0	0	0	0	0	0	8	12	0	2	0	2	2	7
CAV1	34	46	110	60	4	0	0	3	8	4	1	2	2	1	1	0
CAV2	5	4	4	5	1	0	0	0	16	14	4	5	0	5	2	6
CAVIN1	7	11	7	9	0	0	0	0	15	23	4	6	0	0	3	5
CBR1	8	20	15	8	0	0	0	0	113	116	9	29	0	12	5	9
CBR3	4	11	7	2	0	0	1	0	2	2	0	0	2	1	0	0
CBR4	5	2	1	2	0	0	0	0	8	10	2	1	1	1	1	0
CBX1	6	5	10	4	0	1	0	0	12	10	3	6	0	7	1	2
CBX3	37	51	65	45	0	0	1	0	48	40	7	28	2	10	4	9
CBX5	14	7	11	1	1	0	2	0	52	48	2	21	3	6	6	3
CBY3	0	0	0	0	0	0	0	0	3	14	1	2	0	0	0	0
CCAR1	27	24	22	5	4	1	3	3	49	40	7	25	20	50	54	45
CCAR2	4	7	9	4	1	4	8	13	1	6	1	5	2	4	0	3
CCDC103	0	0	1	0	0	0	0	0	10	11	1	1	1	0	0	1
CCDC107	5	10	7	4	0	1	0	0	19	22	4	8	0	1	2	3
CCDC115	7	2	5	4	0	0	0	0	23	29	5	7	2	7	5	5
CCDC12	8	12	10	6	0	0	0	0	14	22	0	4	1	1	4	0
CCDC124	20	34	28	12	0	2	1	0	88	74	6	39	2	22	17	18
CCDC167	5	15	10	6	0	0	0	0	9	1	1	3	0	0	0	1
CCDC171	0	1	1	1	0	0	2	0	13	5	0	1	1	4	0	3
CCDC173	4	1	0	2	0	0	0	2	53	19	12	9	58	66	30	11
CCDC174	9	8	7	4	10	3	14	17	35	23	6	19	8	16	26	18
CCDC198	61	101	57	73	30	17	31	20	1	0	0	1	0	1	0	0
CCDC22	1	0	0	2	0	0	0	0	5	11	1	1	0	0	0	2
CCDC25	3	9	10	7	1	0	0	0	13	18	0	2	0	1	4	4
CCDC28B	6	13	7	6	0	0	0	1	1	2	0	0	0	0	0	0
CCDC34	5	9	9	6	0	0	1	0	22	12	2	10	1	4	7	9
CCDC47	7	13	13	8	1	0	2	0	9	17	1	3	0	6	2	3
CCDC50	55	51	68	32	13	6	30	11	664	527	80	165	89	101	143	99
CCDC59	1	8	9	2	0	0	0	0	38	24	4	12	15	7	10	3
CCDC66	3	3	4	1	2	0	2	0	21	8	0	3	7	6	11	8
CCDC80	11	17	15	12	1	0	3	1	3	4	0	4	1	4	0	2
CCDC82	2	6	4	1	1	0	0	0	56	42	13	14	9	16	37	24
CCDC85B	8	19	8	3	1	0	0	0	4	4	0	1	0	1	0	0
CCDC88A	9	10	4	9	1	2	1	1	11	11	6	3	2	7	9	7
CCDC90B	8	16	37	9	3	0	2	0	133	78	20	22	25	18	22	13
CCL2	11	13	35	23	4	1	1	4	0	0	3	4	0	24	47	70
CCL5	0	0	2	3	144	99	229	202	0	0	0	3	3	9	5	7
CCN1	86	100	13	7	20	5	8	7	20	30	5	7	0	1	9	16
CCN2	148	181	19	7	1	1	0	2	2	2	0	0	1	1	2	1
CCNA2	0	3	8	1	1	0	0	0	14	15	0	3	0	1	5	7
CCNB1	20	28	23	21	2	2	6	6	38	71	4	27	2	10	14	21
CCNB2	4	2	5	3	0	0	0	0	13	26	3	8	2	3	6	0
CCNC	9	14	14	8	1	1	3	2	20	27	7	18	1	4	10	6
CCND1	6	12	4	0	1	0	8	7	31	33	4	17	3	8	1	14
CCND3	18	21	35	11	0	0	0	1	13	14	3	4	0	1	2	2
CCNDBP1	2	5	11	6	0	0	1	0	11	4	0	5	3	1	4	5
CCNG1	9	6	12	9	4	0	4	3	48	42	11	26	22	31	47	108
CCNH	8	12	14	11	0	0	0	2	78	90	8	19	23	17	16	8
CCNL1	4	7	8	8	19	12	23	28	21	15	18	17	16	35	47	69
CCNL2	6	5	8	13	0	0	1	0	12	11	2	8	2	4	5	6
CCNQ	1	7	7	1	0	0	0	1	16	17	4	5	2	4	6	4
CCPG1	49	60	36	40	33	18	66	57	16	22	1	6	3	3	2	5
CCT2	188	44	432	30	17	9	39	26	1349	329	205	104	31	77	241	105
CCT3	18	15	46	20	0	1	2	4	56	60	10	30	9	13	17	14
CCT4	87	91	118	92	15	11	15	25	346	307	62	95	46	120	236	160
CCT5	108	122	173	110	9	3	4	5	190	149	36	59	17	44	35	38
CCT6A	55	93	141	105	7	8	5	11	164	111	27	69	7	13	24	34
CCT7	72	86	145	78	5	1	9	1	237	261	46	133	48	90	75	76
CCT8	418	492	657	516	61	16	32	35	3945	2959	926	1306	1299	1088	1279	677
CD109	2	3	5	2	1	0	0	0	25	18	9	13	4	3	2	2
CD151	113	149	237	104	21	12	10	12	97	119	24	46	5	21	21	34
CD164	13	8	12	4	0	0	0	0	9	5	3	7	0	3	2	1
CD2AP	1	2	4	1	1	0	1	1	9	27	1	9	3	5	3	6
CD2BP2	13	19	50	28	0	0	0	0	21	17	4	8	1	1	1	3
CD320	13	18	11	3	2	0	0	0	9	23	1	7	0	1	2	2
CD3EAP	1	5	1	3	0	0	0	0	15	5	0	0	1	1	2	2
CD40	0	0	0	0	0	0	0	0	15	16	5	5	0	4	1	3
CD44	52	79	162	79	9	13	16	15	25	21	4	14	1	4	9	10
CD46	13	5	13	6	0	0	0	0	20	10	2	6	1	6	2	5
CD47	13	24	27	21	1	0	3	4	35	41	4	17	3	2	2	2
CD55	11	12	6	5	1	0	3	1	23	23	3	12	2	6	11	5
CD63	115	165	152	82	4	4	6	0	243	261	63	113	60	65	41	34
CD68	4	1	2	0	1	0	0	0	4	17	1	6	2	2	2	1
CD81	6	14	6	8	1	0	1	1	11	25	1	6	12	17	3	4
CD9	14	16	15	6	1	0	1	0	190	225	27	96	9	44	56	87
CD99L2	4	3	8	4	0	0	0	0	10	9	1	3	0	4	1	1
CDC123	11	10	12	4	1	1	2	2	20	14	4	8	0	4	6	12
CDC14A	0	0	0	0	14	7	41	36	1	2	0	4	1	4	6	4
CDC16	21	27	32	36	0	2	0	3	12	6	3	5	0	4	4	4
CDC20	11	7	17	1	0	0	1	0	13	23	1	13	1	3	10	7
CDC25B	7	7	16	4	0	0	0	1	10	11	1	2	0	2	0	2
CDC25C	4	3	4	1	1	0	0	1	14	12	2	8	1	1	0	0
CDC26	1	4	10	6	0	0	0	2	5	9	0	2	0	1	1	3
CDC27	16	15	19	14	4	3	11	4	38	33	13	15	44	48	29	11
CDC37	17	18	31	14	2	2	1	2	82	77	10	24	2	20	26	47
CDC42	89	82	108	56	8	9	21	30	364	382	101	111	166	86	98	63
CDC42BPA	5	15	2	5	1	0	3	2	7	7	2	5	0	4	1	2
CDC42EP1	28	34	16	12	0	0	0	1	28	37	0	3	0	1	2	2
CDC42EP3	21	13	19	8	1	2	0	6	12	8	2	3	0	1	0	0
CDC42SE1	2	4	4	1	1	1	1	0	5	11	1	1	0	1	0	5
CDC5L	7	15	8	9	1	0	4	5	36	39	8	18	1	23	24	24
CDC6	5	10	11	4	0	1	0	1	6	6	0	3	0	2	1	1
CDCA7	6	6	18	5	0	0	0	0	2	5	0	3	1	1	3	3
CDH10	0	0	0	0	0	0	0	0	0	0	1	1	4	3	10	9
CDH11	11	15	17	5	4	0	4	4	0	0	0	0	0	0	0	0
CDH2	0	4	6	7	0	0	0	0	39	32	9	18	3	10	15	6
CDHR2	0	0	0	0	0	0	0	0	8	11	2	2	2	4	1	2
CDIP1	3	3	3	2	0	0	0	0	23	18	0	3	2	1	3	8
CDK13	3	6	2	2	0	2	2	1	15	15	0	10	2	10	3	2
CDK16	4	3	4	2	0	0	0	1	6	10	4	3	1	4	3	2
CDK2	1	1	5	0	0	0	0	0	13	15	2	4	1	3	4	6
CDK2AP1	7	3	9	1	0	0	1	0	11	7	2	2	0	6	1	1
CDK2AP2	10	8	12	3	2	0	0	0	18	30	1	8	1	6	3	4
CDK4	32	35	28	20	1	1	1	2	79	97	7	40	3	22	8	20
CDK5RAP1	3	2	4	5	0	2	1	0	18	8	6	4	3	11	33	20
CDK5RAP2	7	9	20	7	0	0	0	1	4	11	1	3	0	5	6	5
CDK5RAP3	5	10	10	3	0	0	1	0	35	46	6	25	2	10	7	8
CDK6	2	1	0	1	2	0	1	3	14	11	3	11	2	5	7	12
CDK7	15	9	14	3	1	1	10	2	24	22	9	3	9	11	46	19
CDKL2	0	0	0	0	0	0	0	0	12	14	8	8	13	17	12	11
CDKN1A	8	18	9	3	1	0	0	0	24	34	1	11	7	13	73	97
CDKN3	7	5	2	6	0	0	0	0	14	13	3	3	0	2	1	3
CDV3	0	3	3	4	1	0	0	0	21	15	1	4	1	2	3	11
CEBPZ	17	15	17	23	2	0	9	6	303	144	76	58	612	409	894	321
CEBPZOS	4	6	3	1	0	0	0	0	8	7	1	2	7	3	9	17
CENPF	10	19	22	4	1	1	1	3	40	43	3	16	0	6	6	6
CENPH	2	0	3	0	0	0	0	0	5	17	3	4	1	2	1	1
CENPJ	9	14	4	12	0	1	0	0	7	9	1	3	2	4	5	3
CENPK	4	7	6	5	0	0	0	0	24	20	3	7	0	2	3	3
CENPM	5	9	6	5	0	0	0	0	28	34	2	10	1	2	4	0
CENPN	8	10	5	1	1	0	1	2	12	13	4	2	1	1	4	3
CENPS	12	8	0	0	0	0	0	0	24	5	2	5	4	6	5	1
CENPU	2	6	6	3	0	0	0	2	10	13	0	7	1	3	10	7
CENPW	13	9	10	3	0	0	0	0	21	28	1	4	0	0	1	1
CEP170	0	4	1	2	0	0	0	0	10	14	5	15	4	4	7	6
CEP290	43	57	56	48	3	3	2	5	122	75	25	24	68	54	35	23
CEP44	1	3	1	1	0	0	0	0	10	6	4	4	7	4	3	5
CEP55	12	15	10	6	1	0	1	0	102	61	12	29	19	25	14	18
CEP63	62	68	71	48	5	5	4	5	18	21	9	9	10	15	4	4
CEP95	2	2	2	0	2	0	0	0	3	4	0	2	1	4	2	11
CERCAM	13	25	25	19	1	3	2	2	13	10	0	7	0	2	0	3
CERS2	21	20	38	34	1	3	0	1	8	6	0	2	0	3	2	1
CERS5	5	9	10	7	0	0	1	0	12	15	2	3	0	0	1	9
CERT1	6	10	4	5	24	8	55	32	33	22	8	9	99	42	93	42
CETN2	8	9	3	2	1	0	1	0	32	29	10	15	2	12	15	21
CETN3	4	11	17	4	2	0	0	0	25	19	4	11	2	7	9	6
CFAP20	8	6	5	5	0	1	2	2	12	14	3	6	0	4	11	12
CFAP298	20	6	20	7	0	0	0	1	27	8	0	5	5	7	15	5
CFAP36	13	10	12	8	2	1	0	3	27	26	4	20	10	13	13	22
CFAP97	3	5	2	4	0	0	0	0	11	13	6	4	0	8	1	2
CFDP1	10	16	15	4	0	1	0	2	54	49	10	24	6	9	2	12
CFHR2	467	533	552	315	35	24	30	62	0	0	0	0	0	0	0	0
CFL2	2	1	7	4	2	0	0	2	21	26	8	10	1	2	3	4
CFLAR	7	9	5	7	2	1	4	1	18	20	0	5	1	0	2	5
CGGBP1	3	5	6	4	0	0	1	0	7	12	1	8	1	6	8	12
CGNL1	0	0	0	0	1	0	0	1	32	15	1	8	6	14	13	6
CHAF1A	1	5	4	2	0	0	0	0	13	9	0	3	0	3	2	1
CHCHD1	25	26	21	14	0	0	0	0	24	33	2	9	1	4	4	2
CHCHD10	2	5	5	2	1	0	0	0	46	97	5	28	3	18	8	8
CHCHD5	17	19	22	15	1	0	1	1	18	26	4	9	1	9	7	7
CHCHD6	8	2	4	3	1	0	0	0	18	15	2	6	0	2	0	3
CHCHD7	5	10	20	7	0	0	0	0	28	41	10	17	0	5	8	8
CHD1	9	21	7	4	2	2	4	6	6	6	0	9	3	8	4	11
CHD1L	4	3	11	6	0	0	1	1	8	7	0	4	0	2	2	0
CHD2	5	11	9	14	9	7	13	16	27	14	14	48	16	48	84	98
CHD3	2	4	6	5	0	0	0	0	11	12	1	5	2	11	7	2
CHD4	74	89	96	63	2	3	4	8	317	240	69	92	203	160	236	188
CHD5	0	0	0	0	0	0	0	1	5	1	5	7	66	44	44	16
CHD7	10	7	8	1	2	2	0	4	53	41	9	35	43	51	43	31
CHD8	1	1	1	4	0	0	0	1	13	11	0	10	4	8	9	8
CHD9	4	6	10	5	1	2	5	3	16	8	7	12	17	19	15	18
CHEK2	0	2	0	0	8	4	14	9	2	1	1	3	2	2	2	2
CHERP	2	4	7	2	0	1	2	1	5	10	0	1	0	2	6	8
CHID1	25	48	59	28	0	2	0	0	11	23	5	5	0	2	3	1
CHMP1A	14	12	22	15	0	1	1	4	14	13	1	11	0	0	2	3
CHMP2A	30	45	56	24	2	3	6	4	62	103	14	39	20	63	50	53
CHMP2B	5	8	5	2	0	0	1	0	15	12	2	5	0	5	4	7
CHMP4A	2	9	2	3	0	1	1	0	7	17	0	9	1	4	5	9
CHMP4B	5	10	14	6	0	0	0	1	32	14	7	7	4	16	13	9
CHMP5	11	12	22	17	3	4	3	7	37	27	6	20	4	24	42	56
CHMP6	4	9	27	9	0	0	0	0	13	19	2	4	0	1	0	4
CHORDC1	6	9	14	8	0	0	1	1	8	2	2	3	0	2	2	1
CHPF	10	11	18	10	1	1	1	1	4	3	0	3	0	1	2	0
CHPF2	7	10	13	5	0	0	0	1	4	1	0	0	0	0	0	0
CHPT1	6	5	11	7	1	1	1	0	8	9	0	3	5	2	3	3
CHRAC1	3	3	3	0	0	0	0	0	5	11	1	4	0	2	0	0
CHRDL1	0	0	0	0	0	0	0	0	6	10	1	5	0	5	1	7
CHST12	7	7	13	5	0	0	0	1	4	4	1	3	0	2	1	0
CHTOP	7	16	14	10	1	1	7	9	15	29	2	9	5	6	5	11
CHURC1	4	8	4	2	0	1	0	0	15	21	2	7	1	5	1	2
CIAO1	8	17	20	6	1	0	0	1	31	34	1	6	0	0	3	4
CIAO2B	21	36	31	14	2	0	4	2	26	38	8	12	6	11	16	15
CIAPIN1	7	7	18	9	1	0	3	1	6	9	1	2	0	0	1	2
CIART	0	0	0	0	1	0	3	4	1	1	0	2	2	6	12	16
CIB1	12	14	27	11	0	0	0	0	45	75	5	26	7	15	19	14
CINP	5	4	8	4	0	0	1	2	18	24	1	10	3	9	7	5
CIR1	11	14	22	10	6	0	4	8	16	22	1	7	5	10	15	19
CIRBP	14	25	19	9	0	0	0	2	44	60	6	16	5	11	19	13
CISD2	10	19	26	9	0	1	0	1	38	43	4	11	0	11	5	4
CISD3	5	9	15	10	0	0	0	1	28	47	2	14	2	8	3	4
CITED2	3	17	1	0	2	3	5	7	1	0	0	0	0	0	0	1
CIZ1	3	3	11	1	0	0	0	0	7	12	3	7	1	8	6	2
CKAP2L	14	12	18	6	1	0	0	1	144	113	25	38	37	38	28	24
CKAP4	9	12	19	7	0	0	0	0	1	1	0	0	0	1	0	0
CKAP5	11	20	8	11	0	0	0	1	34	37	5	18	1	15	12	10
CKLF	17	12	10	7	0	0	0	0	50	66	2	15	0	3	4	7
CLASP1	13	18	20	18	15	12	21	24	26	18	3	20	9	10	12	12
CLCC1	6	0	2	5	0	0	0	2	12	13	2	3	1	8	5	4
CLCN3	2	1	2	3	1	0	1	1	11	15	2	9	1	12	13	13
CLDN1	0	0	0	0	0	0	0	0	9	10	0	6	0	1	3	5
CLDN10	0	0	2	0	0	0	0	0	32	21	3	12	0	2	4	4
CLDN2	0	0	0	0	0	0	0	0	45	50	5	13	3	2	1	3
CLDN4	0	1	0	1	0	0	0	0	29	13	1	3	0	0	0	2
CLDND1	8	10	7	7	1	0	2	1	10	9	2	8	1	4	3	2
CLEC2B	8	11	6	5	1	0	2	4	0	1	0	2	0	2	1	1
CLEC4A	0	0	0	0	0	0	1	0	0	0	0	2	1	3	12	6
CLEC4D	0	0	0	0	0	0	0	0	200	158	56	183	130	201	147	152
CLIC1	54	75	77	31	3	2	4	1	123	143	19	57	3	26	26	33
CLIC4	6	10	10	2	3	1	3	1	119	151	10	48	8	21	14	19
CLINT1	22	22	34	19	3	1	8	4	31	33	7	12	2	5	12	19
CLIP1	13	23	17	18	6	5	5	1	101	92	22	48	80	95	49	31
CLIP4	21	41	15	19	0	1	0	0	24	18	5	10	1	7	3	3
CLK1	8	9	3	11	3	9	17	13	27	37	26	46	44	134	239	327
CLK4	2	1	3	7	6	1	11	6	12	5	5	9	5	8	42	66
CLNS1A	3	8	14	5	0	0	0	0	80	94	19	28	2	20	15	17
CLPB	3	1	2	1	0	0	3	0	12	11	2	7	2	3	5	3
CLPP	6	10	13	6	0	0	0	1	12	23	0	3	0	1	3	2
CLPTM1	6	8	18	7	1	1	0	1	16	9	4	8	3	7	10	12
CLPTM1L	10	10	9	17	0	0	3	0	9	8	5	6	1	3	2	1
CLPX	4	3	10	3	0	0	3	1	106	81	19	34	71	79	113	77
CLTA	192	255	256	214	40	31	42	48	95	106	12	29	0	4	12	10
CLTB	8	6	6	1	0	1	2	1	8	15	3	5	0	1	1	2
CLTC	13	9	17	15	1	1	4	1	65	43	12	19	2	10	11	18
CLTCL1	1	1	0	1	0	0	0	0	12	28	3	2	0	3	3	3
CLU	24	43	34	25	6	2	6	3	17	26	3	12	3	16	7	9
CLYBL	3	0	0	1	0	0	0	0	26	26	2	10	1	7	6	5
CMAS	6	6	9	6	0	0	0	0	17	21	5	6	0	1	2	3
CMBL	21	23	15	9	0	0	0	0	0	0	0	0	0	0	0	0
CMC2	10	9	8	5	0	0	1	1	15	10	1	0	1	1	1	2
CMC4	1	9	5	4	0	0	0	0	10	12	0	1	1	3	3	2
CMPK1	9	18	18	11	2	0	1	0	25	23	7	12	1	8	4	10
CMSS1	2	8	11	9	1	1	3	2	3	5	0	2	0	2	1	0
CMTM3	20	26	18	22	0	1	0	0	41	54	7	17	0	9	12	9
CMTM6	47	44	60	30	1	2	0	2	129	151	28	60	46	66	37	37
CMTM7	0	0	0	0	0	0	0	0	8	11	2	1	0	2	1	1
CMTM8	13	10	6	6	0	0	0	0	0	0	0	0	0	0	0	0
CNBD2	0	0	0	0	1	0	0	0	15	9	5	8	7	9	2	3
CNBP	27	36	41	27	0	0	2	4	53	58	7	22	0	5	14	20
CNDP2	7	6	25	7	0	0	0	0	15	12	1	2	0	0	1	2
CNGA1	11	12	12	8	0	2	1	1	0	0	0	0	0	1	0	0
CNIH1	19	19	17	12	0	1	1	0	34	32	8	22	2	17	10	13
CNIH4	11	24	19	5	1	1	0	1	27	38	3	5	1	3	1	3
CNKSR2	0	0	1	0	0	0	0	1	11	15	9	17	22	25	8	9
CNN3	37	45	60	28	3	0	2	3	73	95	15	24	4	11	17	13
CNOT1	10	12	11	7	2	0	1	1	20	21	10	16	5	21	27	15
CNOT10	6	17	7	7	1	0	0	0	43	45	7	16	5	14	12	13
CNOT11	4	0	0	2	2	0	2	0	13	8	3	4	6	10	12	6
CNOT2	19	19	23	5	2	2	7	6	5	9	3	2	0	5	4	5
CNOT3	7	7	6	4	1	1	0	0	13	6	2	2	0	1	4	12
CNOT4	1	2	3	2	2	0	2	2	1	2	3	12	10	13	6	11
CNOT7	16	39	34	28	3	0	0	1	17	11	5	9	1	4	8	2
CNOT9	2	9	11	3	1	1	1	1	7	9	0	3	0	0	3	1
CNP	10	11	17	11	0	0	0	0	12	21	2	6	1	2	5	6
CNPPD1	7	12	11	6	0	0	0	0	5	9	1	1	0	0	0	0
CNPY2	10	13	22	10	0	0	0	0	12	26	1	14	1	2	8	7
CNPY3	6	9	7	8	1	0	0	0	26	22	2	11	1	2	3	3
CNRIP1	7	7	6	10	1	0	0	0	4	6	1	1	0	1	1	3
CNTLN	6	6	1	7	1	0	1	3	37	25	4	18	13	30	13	11
COA1	20	23	16	18	1	1	0	0	46	34	9	12	2	7	6	3
COA4	5	12	8	4	0	0	0	1	9	14	1	2	0	0	2	0
COA5	9	15	14	5	0	0	0	0	18	31	2	11	0	4	8	7
COA6	7	15	9	8	0	0	1	1	11	15	1	2	0	0	0	2
COA8	4	7	10	2	1	2	0	1	10	7	1	4	1	3	3	2
COG1	5	5	13	4	1	0	0	0	12	15	1	3	2	8	11	13
COG3	6	11	3	2	1	1	1	0	0	2	3	4	1	2	3	8
COG4	2	11	11	4	1	1	0	0	8	13	2	6	0	2	1	1
COG5	27	24	15	15	2	0	4	7	50	40	11	10	10	7	4	5
COG7	9	0	4	3	0	0	4	1	24	18	11	10	2	5	12	9
COL11A1	0	0	0	0	0	0	0	0	15	11	2	8	2	6	5	5
COL12A1	17	12	21	22	2	1	0	1	1	0	1	0	0	1	0	1
COL1A2	281	468	348	327	15	12	13	13	10	4	1	6	3	1	3	1
COL3A1	10	8	6	5	0	1	0	1	0	0	0	2	1	0	0	0
COL4A1	1	5	6	8	2	0	0	0	5	18	5	15	1	3	1	10
COL4A2	5	8	35	9	3	0	1	0	22	20	10	16	8	11	7	7
COL6A2	9	9	10	8	1	0	0	1	14	16	4	4	2	1	3	2
COL6A3	44	61	66	59	0	4	2	6	3	1	0	1	1	0	1	0
COL7A1	0	1	3	1	0	0	0	0	9	13	6	7	1	5	2	7
COL8A1	5	8	35	13	12	9	12	7	15	10	1	5	4	8	0	3
COLEC12	8	2	10	0	0	0	0	1	5	3	1	0	0	3	1	2
COMMD1	4	3	7	2	0	1	0	0	11	9	0	2	0	3	2	1
COMMD10	6	5	7	1	3	0	0	1	7	15	3	4	0	0	1	3
COMMD4	4	8	23	3	1	0	0	0	13	16	2	10	0	4	2	5
COMMD5	12	14	11	3	0	0	0	0	4	5	0	0	0	0	0	0
COMMD6	10	19	24	9	0	0	0	0	26	37	6	11	1	8	9	8
COMMD7	1	0	3	2	1	0	0	0	28	26	3	5	0	2	0	1
COMMD8	15	15	21	9	0	0	0	0	47	31	8	23	5	14	13	6
COMMD9	10	2	11	7	0	0	0	0	12	21	3	7	1	4	14	10
COMT	32	58	59	24	1	4	2	1	12	13	3	11	2	8	4	12
COMTD1	2	6	4	2	0	0	0	0	29	21	2	9	1	3	4	0
COPA	10	11	16	9	4	3	4	3	44	29	4	17	10	27	6	11
COPB1	32	70	80	45	5	2	6	7	68	62	11	27	13	27	14	12
COPB2	45	98	43	80	6	1	2	5	20	18	4	8	3	4	1	7
COPE	33	29	44	29	7	0	1	3	94	110	21	49	25	42	31	34
COPG1	4	10	4	5	0	0	0	1	8	6	0	6	1	2	1	1
COPRS	3	8	2	1	0	0	0	0	5	12	2	4	1	3	8	4
COPS2	45	59	63	33	30	16	65	69	48	50	21	33	38	51	42	37
COPS3	11	24	37	13	1	0	0	0	31	16	1	7	1	5	16	21
COPS4	18	20	25	8	0	1	4	4	20	29	4	14	9	18	40	27
COPS5	13	15	23	13	27	4	31	14	35	32	18	29	128	80	179	63
COPS6	39	47	62	32	3	1	1	1	67	92	12	35	0	16	16	23
COPS7A	11	17	23	5	0	0	1	0	42	40	9	16	2	6	3	6
COPS7B	5	10	10	6	0	0	0	0	6	9	0	2	0	1	1	4
COPZ1	39	33	33	18	2	3	3	8	33	31	3	10	2	3	3	0
COQ5	4	4	7	2	0	0	0	0	47	37	4	11	0	8	9	13
COQ6	3	2	4	2	1	0	0	1	15	25	3	9	1	12	18	15
COQ9	19	20	23	11	0	0	1	3	24	27	1	5	1	0	1	9
CORO1B	25	31	28	34	2	1	2	1	59	50	21	45	20	23	12	11
CORO1C	8	6	9	4	0	0	1	0	6	16	2	5	1	0	0	0
COTL1	4	6	12	4	2	0	1	0	9	20	3	4	3	1	6	7
COX11	10	8	14	4	0	0	0	0	38	15	5	7	9	5	17	8
COX14	12	12	13	8	0	0	0	0	30	33	1	6	1	6	1	2
COX16	4	9	4	5	1	0	2	0	52	71	14	25	4	21	12	16
COX17	5	18	14	1	3	0	1	1	16	15	1	11	0	1	4	8
COX19	4	2	0	1	4	3	11	12	5	7	2	5	0	5	0	3
COX20	15	22	23	14	4	0	0	1	52	53	6	18	8	14	9	24
COX4I1	155	156	187	79	11	9	18	13	245	290	40	122	11	55	87	68
COX5A	68	99	96	45	2	6	3	1	87	102	11	48	12	25	27	30
COX5B	37	65	60	26	2	1	0	2	99	138	11	51	5	24	26	27
COX7A1	0	0	0	0	0	0	0	0	8	17	2	5	0	2	1	1
COX7A2	49	68	74	33	3	0	4	5	163	253	19	60	5	49	39	37
COX8A	84	94	85	38	1	6	4	0	279	277	76	127	165	111	143	111
CPE	3	1	2	0	0	1	0	0	73	36	35	21	52	78	65	36
CPEB2	2	1	3	1	11	5	22	19	1	2	1	1	1	9	6	2
CPLANE1	15	24	22	20	3	1	0	2	261	81	51	74	98	122	75	34
CPM	0	0	0	0	0	0	0	0	8	5	8	16	18	41	61	67
CPNE1	179	192	180	135	19	15	27	21	83	123	25	66	24	57	22	26
CPNE2	3	6	5	1	0	0	1	0	10	3	3	2	8	14	7	6
CPNE3	6	3	2	3	1	0	0	0	10	13	2	8	4	9	5	3
CPNE8	0	0	0	0	0	0	0	0	6	4	2	4	3	5	11	9
CPPED1	1	3	4	0	0	0	0	0	6	10	2	2	0	1	0	0
CPQ	4	1	5	7	1	0	0	0	23	22	4	19	2	8	3	7
CPSF1	5	2	7	3	0	0	0	0	9	12	5	9	3	6	3	6
CPSF3	9	3	11	7	0	1	2	2	25	25	5	12	6	13	24	25
CPSF6	5	9	9	2	4	2	1	3	11	12	3	8	1	2	13	15
CRB3	0	0	0	0	0	0	0	0	14	13	0	2	1	3	0	1
CRBN	19	18	18	11	22	9	39	30	4	3	2	4	1	4	3	11
CRCP	3	3	4	1	0	0	1	1	6	7	0	1	1	4	7	10
CREB3	5	7	18	6	2	0	2	0	18	22	1	2	0	4	4	6
CREB5	0	0	1	2	6	4	14	21	0	0	1	1	0	2	3	2
CREBBP	8	9	3	4	3	4	5	6	12	6	0	3	0	7	4	4
CREBRF	0	0	1	0	0	2	0	1	2	2	0	6	3	6	15	16
CREG1	5	20	14	4	0	0	0	0	38	32	9	11	5	4	13	18
CRELD2	21	24	19	6	0	0	0	3	29	44	3	14	7	38	5	7
CREM	1	1	7	3	0	0	1	1	11	10	3	4	3	4	3	0
CRIP2	1	4	3	2	1	0	0	0	21	32	6	12	5	9	10	10
CRK	18	23	12	19	0	0	1	1	2	2	1	0	0	0	0	0
CRLF2	83	69	66	61	6	7	8	14	0	0	0	0	0	0	0	0
CRLF3	1	0	1	1	0	0	0	0	4	15	0	4	1	1	4	2
CRNKL1	3	8	16	6	2	1	8	6	21	18	4	10	28	17	49	44
CROT	7	10	6	8	0	0	0	1	2	5	0	4	1	2	1	2
CRTAP	10	14	20	9	0	1	2	1	14	22	2	12	1	6	7	5
CRYAB	0	0	3	0	0	0	0	0	5	14	2	4	0	3	1	3
CRYL1	3	10	5	6	0	0	0	0	19	32	0	7	0	4	3	0
CRYZ	6	5	4	1	0	0	0	0	25	24	6	15	0	10	1	2
CRYZL1	32	21	27	13	2	4	6	3	82	51	9	22	9	9	19	14
CTBS	5	11	14	9	2	0	2	0	0	2	0	0	0	1	0	1
CTH	3	3	3	0	0	0	0	0	27	44	7	12	4	13	11	27
CTNNA1	29	39	28	36	4	6	6	1	15	32	12	17	3	14	5	8
CTNNAL1	19	23	27	25	3	2	3	3	23	19	11	10	10	6	24	7
CTNNB1	5	14	6	2	0	2	1	2	97	78	17	37	8	17	16	22
CTNNBL1	9	20	23	17	2	0	1	0	25	20	3	18	1	9	10	15
CTR9	6	16	10	6	1	0	2	1	12	16	4	7	4	5	14	13
CTSA	42	38	59	37	0	2	1	0	27	39	3	23	1	10	11	34
CTSB	85	118	129	58	12	7	4	2	28	35	10	30	3	22	11	20
CTSD	159	152	294	136	22	2	7	10	215	285	40	171	34	104	64	103
CTSF	6	11	6	2	0	0	0	0	6	17	2	1	3	12	1	6
CTSH	6	6	5	1	2	0	0	0	6	11	1	4	0	2	3	2
CTSL	18	14	30	16	1	1	3	2	497	552	147	321	80	269	223	294
CTSS	10	23	21	20	2	4	7	11	0	0	0	0	2	0	1	0
CTTN	73	119	56	160	3	7	1	2	25	29	2	6	0	3	3	9
CTU2	5	1	10	7	0	0	0	0	3	3	0	1	0	0	0	1
CUEDC2	14	22	22	10	0	0	4	0	67	66	12	17	12	20	20	4
CUL1	6	7	10	9	0	0	0	0	43	38	6	18	3	13	26	51
CUL2	1	3	2	3	0	0	0	0	5	3	0	2	1	3	7	11
CUL3	27	25	36	12	3	0	13	9	122	72	16	31	62	77	85	61
CUL4A	4	0	8	12	1	0	0	1	4	6	2	7	0	2	1	3
CUL4B	11	16	18	18	4	1	5	4	54	24	17	23	59	41	44	25
CUL5	5	9	5	4	1	0	4	1	15	17	1	15	1	3	4	6
CUTA	109	146	97	78	0	3	1	1	124	123	12	50	23	36	13	15
CUTC	11	12	5	5	1	0	0	0	2	3	0	1	1	0	0	1
CWC15	13	19	11	10	2	1	6	7	141	136	27	48	135	130	254	160
CWC22	29	27	45	10	27	16	37	24	108	43	35	24	259	75	195	60
CWC25	15	19	11	15	3	6	15	16	47	40	14	28	11	60	61	90
CWC27	8	10	12	6	0	1	0	1	11	13	3	7	6	4	14	12
CWF19L2	18	23	5	18	4	3	2	2	15	13	0	8	3	6	6	2
CXADR	0	0	0	1	0	0	0	0	25	27	3	12	1	4	1	6
CXCL1	0	0	0	0	0	0	0	0	2	0	0	1	1	3	5	12
CXCL10	0	0	4	10	51	37	53	61	0	0	4	23	14	105	237	303
CXCL11	0	0	0	0	2	4	7	5	0	0	2	0	13	17	31	13
CXCL12	203	246	165	99	8	2	9	5	0	5	1	3	0	2	2	3
CXCL14	1	0	0	0	0	0	0	1	229	308	29	132	3	56	45	46
CXCL2	0	0	0	0	0	0	0	1	0	1	2	6	1	10	14	18
CXXC1	3	7	10	5	0	0	2	1	17	5	1	2	4	0	2	4
CXXC5	5	13	11	8	0	0	0	0	11	10	1	2	0	1	0	0
CYB561	5	11	3	0	0	0	0	0	3	13	1	4	1	3	2	1
CYB561A3	8	13	17	9	0	1	0	0	1	6	0	2	0	0	1	1
CYB561D2	4	4	6	5	0	0	0	0	11	10	0	2	0	3	0	1
CYB5A	11	24	28	10	0	1	2	0	35	43	6	16	2	7	9	13
CYB5B	10	9	6	6	0	0	0	0	2	5	0	0	0	3	1	1
CYB5D2	6	6	13	6	0	0	0	1	8	14	2	1	0	0	1	1
CYB5R1	6	10	6	2	1	0	1	0	3	4	0	2	0	3	1	2
CYB5R3	18	21	30	17	1	0	1	2	86	102	16	44	5	19	27	54
CYBA	0	0	1	0	0	0	0	0	34	37	7	16	2	11	6	5
CYBC1	11	15	24	13	0	0	1	0	14	20	1	1	0	0	0	0
CYBRD1	11	24	14	5	0	0	0	0	57	49	11	30	2	16	8	8
CYC1	103	111	155	55	4	4	5	6	223	280	35	92	11	39	48	73
CYFIP1	11	13	14	9	1	0	1	0	12	7	2	8	0	2	2	2
CYFIP2	0	0	1	0	0	0	0	0	20	15	5	9	4	10	2	4
CYHR1	6	18	18	6	0	0	1	1	3	1	0	1	1	0	2	0
CYLD	3	3	5	3	3	0	6	16	2	2	0	5	5	10	18	22
CYP3A5	1	1	1	2	1	1	1	0	345	398	47	146	11	72	81	137
CYRIB	15	21	17	8	0	1	1	0	13	9	4	16	1	6	5	7
CYSTM1	3	6	5	4	0	2	0	0	15	27	3	7	0	5	9	13
CYTH2	4	16	5	6	0	1	1	0	16	18	0	1	0	2	2	5
CS	7	8	13	10	0	0	0	1	31	44	8	18	2	12	8	16
CSDE1	44	90	64	62	14	15	18	25	85	107	57	105	24	132	112	76
CSE1L	25	37	45	50	4	1	4	5	90	78	23	66	28	35	67	77
CSKMT	0	1	1	0	0	0	0	0	73	112	5	29	4	3	2	4
CSNK1A1	26	24	42	16	4	3	10	9	40	32	10	12	2	11	12	9
CSNK1D	11	17	10	6	0	2	4	5	29	26	8	13	1	12	16	14
CSNK1G3	1	7	0	1	0	0	1	1	11	4	5	3	2	2	4	5
CSNK2B	30	23	38	19	0	0	0	1	28	38	2	12	2	4	6	4
CSPP1	6	10	16	5	3	0	6	2	10	9	9	10	7	16	29	26
CSRP1	32	29	52	25	5	1	0	0	32	40	6	35	1	6	5	12
CSRP2	3	6	1	4	0	0	1	2	12	4	0	3	0	1	1	0
CST3	116	159	209	102	18	8	10	10	548	748	125	355	86	292	330	334
DAB1	0	0	0	0	0	0	0	0	2	3	0	3	0	1	4	10
DAB2	8	9	4	2	1	1	2	1	11	8	1	3	1	1	0	0
DACH2	0	0	0	0	0	0	0	0	137	129	47	102	86	169	104	99
DAD1	8	17	29	21	0	1	1	0	47	49	1	18	2	12	5	7
DAGLB	2	10	7	3	0	0	4	0	4	2	0	2	1	1	2	0
DALRD3	17	22	19	12	0	0	1	1	30	22	2	10	0	4	2	5
DAP	38	38	52	26	5	3	7	5	22	32	6	12	1	3	5	3
DAP3	10	17	12	10	2	1	1	0	22	18	1	8	1	3	6	10
DAPK3	7	13	10	4	0	0	0	1	14	16	2	4	0	2	5	6
DARS1	48	35	72	25	5	3	4	2	93	32	26	28	58	20	57	47
DAXX	5	8	10	3	2	0	1	1	14	12	4	3	0	5	2	11
DAZAP1	3	3	7	0	0	0	0	0	29	32	6	11	0	5	7	4
DAZAP2	19	27	20	22	0	0	0	0	19	29	3	8	0	2	6	8
DBF4	8	13	21	10	1	0	6	1	19	10	7	4	17	14	20	9
DBN1	19	18	32	13	0	0	0	0	46	65	7	14	5	8	5	7
DBNDD2	3	0	5	2	0	0	0	0	24	26	4	1	0	2	6	3
DBNL	15	13	36	15	1	2	1	2	40	58	2	17	0	4	2	5
DCAF11	2	3	4	2	0	0	0	0	12	8	2	3	2	5	1	0
DCAF13	29	33	52	33	0	2	0	1	10	16	3	8	1	7	2	3
DCAF6	7	3	10	3	1	0	2	1	16	22	7	18	13	20	18	17
DCAF8	8	33	15	16	3	8	8	10	20	19	8	17	8	31	19	27
DCBLD2	5	13	15	13	5	2	1	5	12	11	3	7	4	4	5	2
DCPS	1	7	2	2	0	0	0	0	11	17	3	4	3	1	1	5
DCTD	7	11	17	12	0	0	1	1	5	7	1	1	1	1	0	1
DCTN2	31	39	42	21	3	2	3	7	64	79	16	27	4	18	15	15
DCTN3	19	32	29	17	0	0	2	0	57	63	7	18	2	11	6	12
DCTN5	8	13	7	7	0	1	2	2	1	5	0	3	0	1	2	2
DCTN6	39	37	38	28	3	0	12	8	34	47	8	18	6	21	17	10
DCTPP1	11	14	26	10	0	0	0	1	13	24	5	6	0	2	1	5
DCUN1D1	0	0	4	1	1	1	5	7	5	5	3	3	8	18	13	8
DCUN1D5	10	9	20	14	0	2	2	0	6	15	3	6	2	4	7	6
DCXR	10	18	20	11	0	0	1	1	20	40	5	9	2	7	4	11
DDA1	4	7	13	5	1	0	1	0	18	14	2	2	0	1	2	2
DDAH2	11	9	12	6	0	0	0	0	11	18	0	2	1	1	6	2
DDB1	8	10	10	5	1	1	0	1	11	8	1	5	2	4	1	4
DDB2	0	1	2	1	0	0	1	0	23	19	1	16	2	2	2	14
DDIAS	7	1	14	6	0	0	0	1	5	4	1	2	3	1	0	0
DDIT3	1	1	0	2	1	0	1	2	13	3	2	4	0	5	25	32
DDIT4	3	1	7	5	0	0	1	0	0	0	0	0	0	4	20	31
DDOST	17	25	33	16	3	3	0	1	88	105	19	68	12	54	45	20
DDR1	13	7	20	11	0	0	2	0	7	8	1	4	1	2	1	4
DDRGK1	10	8	18	12	0	0	0	1	83	55	13	21	3	14	15	9
DDX1	26	81	37	54	1	3	1	1	410	326	74	165	134	195	123	77
DDX10	10	15	28	11	1	1	7	5	39	36	12	26	23	26	34	14
DDX17	0	0	0	0	0	0	0	0	76	84	9	25	9	16	23	44
DDX18	11	14	20	13	4	0	1	1	24	34	4	11	3	9	15	10
DDX19B	3	8	4	0	1	0	1	3	13	15	4	6	0	2	10	11
DDX23	1	2	3	1	0	1	0	0	9	10	2	2	1	9	15	11
DDX24	10	10	25	12	1	0	2	3	35	45	1	15	0	4	6	11
DDX27	22	23	31	20	1	2	4	2	27	31	3	11	3	10	11	9
DDX39A	20	26	27	11	4	4	16	15	138	142	15	64	10	34	96	86
DDX39B	30	37	59	33	16	11	25	29	97	116	19	67	79	94	108	145
DDX3X	24	52	24	48	76	61	98	112	248	219	82	226	135	266	254	285
DDX3Y	50	62	37	61	3	0	3	3	38	34	15	36	12	62	50	72
DDX41	33	41	52	21	5	1	4	4	11	9	0	8	1	6	13	10
DDX42	13	16	10	15	0	0	0	1	27	17	4	10	2	14	12	11
DDX47	6	3	11	4	0	1	4	1	7	7	1	1	0	1	8	6
DDX49	9	5	9	3	0	0	0	0	5	7	1	0	5	3	7	11
DDX5	132	207	93	62	19	9	23	33	181	143	35	62	53	113	149	164
DDX50	2	2	5	1	0	0	0	0	10	12	1	5	3	2	4	4
DDX52	1	3	3	4	2	1	4	0	4	7	1	4	0	4	5	11
DDX54	3	5	10	6	0	0	1	0	26	21	4	14	5	7	5	14
DDX55	27	23	29	21	4	6	14	8	205	140	68	66	165	123	243	117
DDX56	14	14	31	20	4	2	3	2	20	35	1	8	0	6	4	6
DDX58	6	10	160	131	1368	655	1679	1243	5	7	9	17	21	28	28	21
DEAF1	3	6	13	3	1	0	2	1	3	4	2	2	2	1	0	3
DECR1	39	70	67	41	3	1	4	1	75	79	10	25	3	15	8	14
DECR2	4	11	7	3	0	0	0	0	9	11	2	4	0	1	1	2
DEF8	9	8	11	10	0	0	0	0	3	2	0	0	0	0	0	0
DEGS1	13	11	22	12	2	0	1	2	20	24	6	12	3	16	7	13
DENND2B	4	6	4	2	0	1	1	0	8	21	0	7	0	3	1	5
DENR	42	74	47	48	3	4	5	9	317	129	78	80	197	188	142	63
DERA	6	3	14	12	2	0	0	0	8	15	1	7	0	0	2	5
DERL1	9	10	19	9	0	0	2	1	14	16	2	7	5	5	2	3
DERL2	9	10	13	9	0	1	2	1	7	17	0	3	1	0	2	8
DFFA	3	6	12	2	0	0	0	0	46	52	4	15	2	6	4	1
DGKA	2	13	4	2	0	0	0	0	17	9	0	4	1	4	3	1
DGKZ	1	1	0	1	0	0	0	0	11	13	2	7	1	6	4	0
DGUOK	11	14	23	12	0	0	0	1	12	22	3	9	0	8	0	6
DHCR7	4	10	12	5	0	1	0	0	4	5	0	0	0	0	0	1
DHDH	0	0	0	0	0	0	0	0	22	22	1	5	1	3	1	1
DHFR	3	6	6	5	0	0	0	0	3	12	1	6	0	1	1	3
DHPS	5	7	3	8	0	1	0	1	10	26	0	4	2	4	4	1
DHRS1	6	4	2	2	0	0	0	0	12	20	0	6	0	0	1	1
DHRS3	2	2	1	1	0	0	0	0	21	16	1	4	1	4	2	0
DHRS7	21	27	21	25	1	3	3	5	28	34	2	18	1	9	5	8
DHRSX	3	9	13	4	2	0	10	6	4	0	0	2	0	1	0	1
DHX15	16	13	10	8	0	3	2	2	29	17	4	16	1	17	14	17
DHX29	26	28	36	18	1	1	3	3	64	66	10	25	6	21	25	30
DHX30	9	4	11	7	0	0	1	1	13	12	1	8	0	10	4	6
DHX32	5	11	7	1	0	0	1	1	26	37	7	11	4	13	14	9
DHX36	6	14	11	10	3	1	12	9	29	30	9	22	20	25	37	39
DHX40	0	4	0	2	0	0	0	1	10	21	4	9	1	1	10	15
DHX58	0	0	2	1	2	0	9	8	4	2	9	21	39	83	45	51
DHX8	5	7	10	3	2	2	1	1	6	8	2	5	0	8	3	7
DHX9	17	29	32	25	2	6	3	6	20	23	12	26	8	13	19	46
DIAPH1	27	38	28	27	22	28	18	28	4	6	0	1	2	0	0	0
DICER1	0	0	0	1	2	1	2	3	8	10	1	2	1	5	2	2
DIMT1	5	3	10	3	0	0	0	0	11	11	6	6	1	0	1	0
DIS3	5	7	12	6	1	2	0	1	4	2	0	5	1	5	5	2
DISC1	3	8	6	12	4	3	3	5	0	0	0	0	0	0	0	0
DKC1	9	23	31	18	0	0	0	0	27	14	1	7	2	8	3	6
DKK1	15	30	17	6	0	1	3	0	0	0	0	0	0	0	0	0
DKK3	11	17	33	9	4	3	0	0	1	1	0	0	0	1	1	0
DLD	13	12	15	20	1	2	2	3	25	17	4	11	1	1	8	5
DLG2	0	1	0	0	0	0	0	0	7	13	2	4	0	3	4	3
DLGAP5	1	2	2	1	0	0	0	0	14	14	4	6	0	1	0	3
DLX2	8	10	1	1	0	0	0	0	0	0	0	0	0	0	1	0
DMAC1	28	27	28	12	0	0	0	1	27	58	4	20	2	6	7	4
DMAP1	16	20	13	12	1	0	2	1	6	9	1	6	1	5	5	3
DMTF1	1	1	4	0	0	0	0	2	1	2	3	6	2	5	5	14
DNAJA3	2	8	23	9	0	0	4	0	22	24	4	13	2	4	11	7
DNAJB1	24	34	31	16	1	0	0	2	9	9	1	2	1	5	13	21
DNAJB12	4	4	11	4	0	1	0	1	2	12	1	2	1	1	1	0
DNAJB4	39	46	18	19	43	31	49	57	19	16	9	14	5	24	23	45
DNAJB6	28	30	29	19	1	2	3	3	11	12	4	4	1	3	3	6
DNAJC10	9	10	6	9	0	0	0	1	23	24	10	18	4	10	3	11
DNAJC11	2	4	9	0	1	0	1	1	8	6	2	4	3	3	7	11
DNAJC13	2	1	1	2	0	0	0	0	8	10	0	3	4	3	6	2
DNAJC15	6	12	7	7	2	0	5	2	0	1	0	1	0	0	0	0
DNAJC19	18	15	30	9	0	0	2	1	27	29	3	7	1	4	5	4
DNAJC2	8	14	16	2	0	0	2	2	21	14	3	4	10	22	46	32
DNAJC25	2	1	2	0	0	0	0	0	8	10	2	3	2	12	12	8
DNAJC3	0	2	5	0	1	1	0	0	13	11	3	14	9	17	6	7
DNAJC4	9	14	13	6	1	3	0	0	15	25	2	5	1	9	4	10
DNAJC7	21	41	47	24	1	0	3	2	39	43	3	20	2	8	5	16
DNAJC9	7	13	10	9	0	0	0	0	16	13	1	6	0	1	0	4
DNASE1L1	5	2	6	1	0	0	0	0	6	15	2	5	3	3	2	6
DNM1L	6	11	6	5	0	3	1	2	32	38	4	15	6	12	14	9
DNM2	5	9	11	1	1	0	0	0	8	7	2	3	0	0	0	0
DNMT1	8	15	20	11	0	1	3	1	32	25	3	16	1	6	3	10
DNPEP	4	5	7	3	2	1	0	1	19	26	0	12	0	5	7	17
DNPH1	16	31	25	15	3	2	0	0	0	0	1	0	0	0	0	0
DNTTIP1	9	31	21	10	2	1	4	9	23	22	1	1	0	3	11	6
DNTTIP2	23	25	26	8	2	1	10	10	88	25	14	15	70	41	118	41
DOCK10	0	2	4	3	0	0	0	0	7	3	3	14	1	8	6	8
DOCK4	13	16	14	11	2	2	3	4	0	0	0	0	0	1	0	0
DOCK7	0	2	4	1	0	0	0	0	2	11	1	3	1	2	1	2
DPCD	7	10	3	3	0	1	1	0	30	28	1	13	4	5	7	9
DPH5	10	16	15	6	0	1	0	3	0	5	1	3	0	0	2	3
DPM1	14	14	27	10	5	3	5	7	145	107	23	34	56	57	74	47
DPM2	3	11	15	7	0	0	0	0	7	9	0	2	0	1	1	0
DPM3	22	48	20	14	0	1	1	0	28	35	4	11	1	7	5	6
DPP3	2	4	2	1	0	0	0	1	11	6	0	2	1	1	1	3
DPP7	11	19	21	13	0	2	0	0	31	42	6	24	4	18	18	14
DPP8	2	17	10	6	2	0	2	2	23	26	4	15	5	10	12	11
DPP9	1	3	6	2	0	0	0	0	10	8	0	3	1	0	2	3
DPYSL3	1	2	5	2	0	0	0	0	11	16	4	4	3	5	2	2
DR1	3	12	4	8	0	0	1	0	5	2	0	0	0	1	1	1
DRAM1	6	7	9	3	0	1	1	1	16	9	4	5	0	4	2	4
DRAM2	10	6	13	5	0	2	3	3	24	24	5	6	4	6	4	3
DRAP1	25	43	60	24	2	1	3	4	23	38	3	12	2	12	10	7
DRG1	34	31	42	14	0	0	4	5	21	23	2	2	0	5	1	7
DRG2	7	8	15	9	2	1	0	0	20	20	1	6	2	2	5	5
DSN1	5	7	3	5	0	0	0	0	7	7	0	0	0	1	7	11
DST	74	140	113	110	21	7	7	8	573	554	201	413	377	560	186	125
DSTN	117	147	248	134	6	5	1	1	58	77	7	34	0	15	18	19
DTX3	0	4	1	0	0	1	2	0	13	8	0	4	1	3	12	11
DTYMK	11	16	15	6	1	0	0	0	29	27	4	15	4	2	8	4
DUS1L	1	9	6	2	0	1	0	0	10	12	0	4	7	6	4	5
DUS4L	2	1	5	2	1	1	0	0	20	19	8	5	5	3	6	3
DUSP1	4	3	0	0	1	1	2	4	11	5	0	10	0	17	19	51
DUSP11	23	33	32	31	14	8	20	23	19	11	3	0	0	5	3	1
DUSP12	5	8	7	5	0	0	1	1	15	22	5	3	0	4	4	8
DUSP14	20	26	2	4	0	0	0	0	5	4	0	2	2	2	0	3
DUSP22	5	5	4	1	0	0	1	0	5	10	0	3	0	4	1	0
DUSP23	1	2	4	2	0	0	0	0	16	7	0	5	0	2	1	2
DUSP3	14	18	14	7	1	1	1	0	11	20	3	4	0	1	2	0
DUSP4	13	15	1	1	4	1	4	5	1	0	0	1	0	0	1	0
DUT	9	17	23	9	0	2	0	0	17	23	2	15	1	7	2	2
DYM	1	2	2	1	0	0	1	1	15	13	2	7	0	3	0	1
DYNC1H1	10	3	5	2	0	0	0	1	7	6	6	4	2	4	2	2
DYNC1I2	11	19	19	22	1	1	1	0	38	45	7	20	1	14	7	23
DYNC1LI1	23	18	17	10	1	1	2	2	26	18	1	5	0	5	6	12
DYNC2H1	3	3	2	3	2	2	1	0	11	7	5	7	4	5	6	4
DYNC2LI1	5	8	10	6	0	1	3	0	39	31	19	20	4	19	25	10
DYNLL1	21	34	62	33	1	0	2	0	61	52	10	24	0	10	5	9
DYNLL2	18	18	40	10	0	0	0	0	27	43	3	12	1	4	5	6
DYNLRB1	11	21	11	4	2	2	0	0	73	107	14	27	10	29	19	24
DYNLRB2	1	0	0	0	0	0	0	0	8	18	2	6	0	3	2	2
DYNLT1	18	23	36	19	1	3	1	0	26	27	1	3	1	4	0	1
DZIP1	2	2	1	4	0	0	0	0	21	23	1	14	4	8	4	7
DZIP3	11	7	14	3	1	0	0	0	13	16	4	2	1	3	2	0
E2F6	1	5	2	0	0	0	0	1	7	17	2	5	1	12	13	16
EAPP	3	6	6	5	0	1	1	2	20	10	0	5	2	2	2	5
EBF1	13	31	12	11	3	2	2	3	4	0	2	0	1	1	0	0
EBNA1BP2	22	26	63	28	3	1	4	3	57	33	13	13	14	23	31	29
EBP	4	3	7	0	0	0	0	0	26	20	1	10	1	6	1	2
EBPL	418	582	425	400	234	198	330	351	2	3	0	2	0	0	0	0
ECE1	6	10	10	3	1	1	0	0	2	3	0	0	0	0	2	2
ECH1	52	60	62	25	2	1	0	1	59	82	19	46	18	35	32	23
ECHDC1	4	7	6	2	0	0	0	0	16	17	1	6	1	1	1	7
ECHS1	18	42	45	20	1	2	0	1	94	78	11	34	2	24	32	25
ECI1	43	72	50	11	0	3	2	1	11	18	2	3	1	2	1	1
ECI2	16	14	21	7	1	0	1	1	10	14	2	5	1	3	3	3
ECM1	9	15	14	10	0	0	0	0	19	19	4	6	4	11	6	7
ECPAS	11	16	18	11	0	0	0	0	40	33	15	17	10	16	9	3
ECSIT	13	15	18	11	1	2	2	1	51	60	8	28	13	13	11	3
EDEM2	7	11	5	4	0	1	0	1	10	13	1	5	2	2	0	4
EDF1	56	105	95	29	4	2	3	3	174	210	18	76	15	44	24	15
EDRF1	29	34	25	35	3	2	6	6	0	0	0	3	0	1	5	1
EEA1	21	62	26	50	9	4	2	10	67	80	20	57	77	131	43	35
EED	13	17	8	10	5	1	3	3	16	21	5	9	6	9	15	17
EEF1A1	5710	5614	7681	3946	307	171	268	225	32865	27618	8102	13789	8955	19686	12746	8772
EEF1AKMT4	3	7	11	8	0	0	0	0	1	0	0	0	0	0	0	0
EEF1D	75	92	126	68	6	4	4	4	305	307	55	134	55	143	115	111
EEF1G	223	319	284	181	33	13	8	17	574	727	121	314	70	249	222	331
EEF2	73	95	80	50	3	3	6	6	176	215	21	96	8	53	35	66
EFCAB11	1	0	0	0	0	0	0	0	12	7	0	3	2	4	5	3
EFCAB14	10	25	21	33	0	0	1	1	33	25	8	13	5	4	12	10
EFCAB2	3	2	1	0	0	0	0	0	8	10	4	7	0	1	4	4
EFEMP2	12	23	31	24	1	2	2	1	25	34	4	12	8	18	4	4
EFHC1	5	4	2	2	0	0	0	1	10	6	2	2	1	1	4	4
EFHD2	1	0	2	1	0	0	0	0	11	10	1	3	1	4	4	1
EFR3A	5	8	10	4	1	0	0	1	8	11	5	6	3	4	5	9
EFTUD2	6	7	12	10	1	0	0	1	43	43	11	15	2	5	3	3
EGLN1	1	1	1	0	0	0	0	0	14	15	3	11	4	4	2	2
EGLN2	10	12	7	1	0	0	0	0	11	17	0	1	0	3	4	2
EGR1	11	8	27	27	551	272	845	539	27	26	3	7	10	16	24	39
EHBP1	29	43	31	38	4	2	4	2	7	9	3	6	6	14	5	11
EHD1	9	6	6	6	0	1	0	0	7	12	2	5	2	2	1	1
EHD2	16	14	25	14	1	0	0	0	0	1	0	1	0	1	1	1
EHHADH	6	12	7	7	0	1	1	0	36	36	14	26	8	17	26	31
EHMT1	3	2	3	0	0	0	0	2	5	7	1	3	0	10	4	3
EI24	15	15	28	16	0	0	0	0	27	34	6	13	6	10	14	17
EID1	51	83	63	45	1	0	2	0	147	169	47	67	22	71	38	31
EIF1	809	854	669	478	53	15	61	35	336	370	40	117	12	100	83	105
EIF1AX	39	52	70	46	3	3	5	4	78	90	10	35	18	53	25	21
EIF1AY	8	9	13	6	0	0	0	0	0	0	0	0	0	0	1	0
EIF1B	35	31	32	11	1	0	1	2	49	50	6	10	39	19	55	40
EIF2A	16	18	15	12	0	2	0	1	30	10	7	10	4	12	2	16
EIF2AK4	8	12	14	3	2	0	0	0	19	13	4	9	5	5	6	7
EIF2B1	19	42	44	26	1	2	3	0	35	57	11	14	6	10	21	20
EIF2B2	3	8	9	7	0	0	2	1	15	14	3	5	0	4	10	9
EIF2B3	11	19	17	11	0	1	1	0	14	11	2	5	4	4	4	12
EIF2B4	10	3	4	3	0	1	0	1	18	15	3	3	4	5	9	7
EIF2D	5	6	11	7	0	2	3	2	23	26	3	16	2	5	15	16
EIF2S1	20	16	27	15	0	2	4	2	186	55	19	26	23	28	93	38
EIF3A	47	63	85	40	6	3	13	14	439	251	95	151	154	235	280	215
EIF3D	82	77	124	70	11	3	16	9	139	118	35	60	89	93	116	88
EIF3E	52	73	55	42	5	5	16	12	94	100	20	51	19	48	28	48
EIF3F	12	27	31	17	0	0	1	2	69	90	15	40	5	36	26	21
EIF3I	18	22	35	5	1	1	0	1	46	46	3	23	2	15	15	15
EIF3K	137	163	153	82	6	6	2	2	109	113	22	57	37	58	36	43
EIF3L	48	82	67	43	4	0	3	10	95	103	20	32	7	28	7	32
EIF3M	80	103	88	62	20	5	23	24	419	473	112	215	105	228	172	165
EIF4A1	64	84	127	77	4	3	3	2	123	141	16	49	3	22	57	56
EIF4A2	7	7	16	10	1	2	2	4	16	24	8	16	2	24	50	80
EIF4E	4	3	9	1	1	0	1	0	6	10	0	3	0	0	0	2
EIF4E2	7	5	9	6	0	0	0	0	11	4	5	2	0	0	1	2
EIF4G1	33	50	64	33	2	1	3	3	57	73	19	39	17	38	20	27
EIF4G2	34	23	71	55	5	1	21	31	85	115	20	69	11	52	73	174
EIF4G3	5	8	7	8	1	0	1	2	6	15	4	11	4	12	1	5
EIF4H	23	29	28	14	1	1	3	3	20	34	5	9	5	6	16	10
EIF5	29	20	49	24	3	2	7	10	31	40	10	13	8	32	61	90
EIF5B	128	171	135	89	6	4	14	11	414	216	35	85	54	146	108	62
EIF6	27	41	57	33	2	1	2	3	32	50	2	10	3	15	4	6
EIPR1	3	2	4	3	1	0	0	0	22	16	5	6	0	3	3	5
ELAC2	7	7	10	7	1	0	0	0	6	6	3	1	2	6	6	7
ELAVL1	1	4	3	2	0	0	0	1	6	11	2	4	2	1	2	0
ELF1	95	253	53	111	9	10	8	11	19	19	6	11	5	13	13	18
ELF3	0	0	0	0	1	0	0	0	0	0	0	1	1	9	19	35
ELL	1	2	1	0	0	1	0	0	14	4	4	3	17	9	3	3
ELL2	28	37	26	16	0	0	3	5	10	14	3	4	7	7	7	8
ELMOD2	5	3	2	3	1	0	1	0	10	8	2	1	9	5	5	3
ELOF1	2	9	4	7	1	0	1	0	4	13	0	8	1	2	2	3
ELOVL5	11	11	12	8	1	0	2	0	34	50	10	20	7	16	16	13
ELP2	2	11	0	3	0	0	2	3	15	20	5	11	3	9	12	21
ELP3	1	3	7	0	1	2	1	1	11	1	1	5	1	1	2	6
ELP4	241	314	275	197	29	26	27	34	7	5	0	1	0	2	0	1
ELP6	1	8	6	11	0	0	0	0	4	2	0	1	0	0	1	0
EMC2	8	6	10	3	0	0	1	0	6	8	1	0	0	3	3	1
EMC3	17	19	23	10	0	0	0	1	15	19	2	1	0	5	3	5
EMC4	12	22	28	9	1	1	0	1	19	27	4	9	2	5	4	6
EMC6	10	19	24	10	2	0	0	1	34	45	4	6	1	1	3	5
EMC7	54	70	82	46	5	2	3	6	127	154	18	51	20	57	44	28
EMC8	3	9	9	5	1	0	1	1	14	26	0	5	0	2	2	5
EMC9	2	2	3	1	0	0	1	0	11	13	0	8	1	2	8	4
EMD	21	45	42	17	0	0	1	0	29	39	5	13	1	7	5	9
EMG1	5	10	13	5	0	0	0	0	14	27	1	6	0	0	2	6
EML3	4	12	9	4	0	0	0	0	3	7	1	1	1	2	0	4
EMP2	21	37	16	14	0	0	0	0	8	12	1	4	0	3	2	2
EMP3	51	89	104	52	4	6	2	1	67	79	3	31	11	20	18	13
ENAH	28	46	21	32	3	1	1	1	5	7	2	5	3	8	9	11
ENDOV	2	9	13	4	0	0	0	0	6	9	1	0	0	3	0	1
ENG	7	23	16	5	0	0	0	1	5	10	0	2	0	0	2	1
ENO1	191	196	319	90	4	2	8	9	2107	2477	426	1063	135	699	328	342
ENO3	0	2	1	0	0	0	0	1	43	43	4	20	5	17	8	14
ENOPH1	3	8	10	4	0	2	1	0	24	21	6	7	0	5	10	11
ENOSF1	0	1	0	0	0	0	0	0	10	8	6	5	0	3	6	3
ENPP5	0	0	0	0	0	0	0	0	13	5	2	4	1	3	2	3
ENSA	28	36	32	20	7	1	9	5	19	22	7	4	2	5	0	5
ENTPD4	13	15	12	11	0	0	1	0	6	9	0	4	0	1	5	1
ENY2	9	20	15	11	2	1	0	1	51	58	7	19	2	9	11	9
EOGT	52	87	45	59	12	13	23	24	0	0	0	1	1	0	0	1
EPB41L2	0	5	3	5	0	0	0	0	4	10	1	3	1	3	0	2
EPB41L3	0	0	0	0	0	0	0	0	2	11	2	2	0	1	0	0
EPB41L4A	0	0	0	0	0	0	0	0	3	2	2	2	1	1	3	10
EPC1	2	6	3	0	2	1	4	2	6	8	5	6	6	16	30	42
EPC2	0	0	0	1	2	0	0	0	1	4	0	6	3	13	7	11
EPCAM	3	8	2	5	7	0	0	0	809	462	170	200	307	230	151	112
EPDR1	1	4	4	2	0	1	0	0	19	15	5	7	2	4	4	3
EPHA2	5	7	2	0	0	0	0	0	18	18	13	26	8	22	15	39
EPHA4	2	1	5	8	5	16	30	32	0	1	0	0	0	0	0	2
EPHB2	0	1	2	1	0	0	0	0	15	8	0	4	1	2	5	3
EPHX1	167	243	255	99	10	3	2	2	15	17	4	7	3	5	4	5
EPN1	1	3	8	0	0	0	0	0	10	10	1	7	1	5	3	3
EPRS1	12	13	15	17	1	3	2	5	46	86	12	44	22	42	17	21
EPS15	3	6	3	1	0	2	0	0	5	10	3	5	4	5	3	12
EPS8	4	6	7	3	0	1	0	2	61	59	13	21	24	46	16	25
ERAL1	9	5	16	9	0	0	0	0	18	29	1	8	0	4	1	2
ERBIN	8	10	2	6	1	2	2	2	10	11	6	15	2	4	6	7
ERCC1	12	14	25	11	2	0	1	0	9	14	2	3	0	2	1	2
ERCC2	3	6	6	3	2	0	0	0	34	31	8	14	8	12	7	4
ERCC3	6	10	10	6	1	3	4	4	23	19	6	15	2	16	32	19
ERG28	7	7	5	4	0	0	0	1	9	17	4	2	1	3	2	3
ERGIC1	11	21	22	7	4	0	0	0	9	11	3	5	0	4	1	7
ERGIC2	14	8	12	12	1	0	4	4	16	17	1	7	0	14	13	15
ERH	16	18	27	15	0	0	1	1	42	68	3	13	1	4	9	15
ERI3	17	25	21	16	0	0	0	0	14	13	2	3	1	2	2	0
ERLEC1	6	8	23	2	1	0	0	0	12	17	2	7	1	3	5	1
ERMARD	3	2	5	2	0	0	1	0	24	21	5	13	0	8	1	3
ERP29	17	24	26	20	0	0	1	0	107	132	20	51	9	59	55	50
ERP44	20	30	38	19	3	3	1	1	102	34	16	15	16	14	12	13
ERRFI1	7	17	4	2	0	0	0	0	3	2	2	1	0	0	1	1
ESD	31	36	39	21	0	3	0	1	147	84	8	25	5	17	18	12
ESF1	35	30	69	16	10	6	27	12	188	45	47	13	112	74	165	45
ESYT1	3	3	4	2	0	0	0	0	16	16	4	1	2	2	2	4
ETAA1	2	7	7	2	1	0	0	4	19	15	3	7	19	29	49	22
ETFA	60	108	87	42	9	5	7	7	304	276	55	150	29	99	75	69
ETFB	39	38	57	23	1	1	1	0	63	73	5	27	3	13	21	15
ETFDH	3	3	2	2	0	0	0	0	5	14	1	5	2	5	7	2
ETHE1	1	5	9	4	0	0	0	1	17	5	3	3	2	7	4	3
ETS2	2	4	3	2	2	0	1	2	0	3	0	5	2	2	6	14
EWSR1	21	38	53	31	4	7	16	10	51	57	10	42	18	35	57	58
EXOC3	7	1	5	2	0	0	0	2	10	2	1	4	0	1	3	5
EXOC7	5	6	7	4	0	1	1	2	26	17	3	12	1	3	3	15
EXOSC1	6	4	5	4	0	0	1	0	8	17	0	7	2	1	1	0
EXOSC10	13	16	25	10	1	0	1	1	26	25	6	10	6	12	53	32
EXOSC3	5	4	10	1	0	0	0	0	8	5	1	3	1	0	0	2
EXOSC4	5	4	8	7	0	0	0	1	12	25	1	2	0	3	4	3
EXOSC5	1	4	7	2	0	1	1	0	65	34	15	13	2	4	6	1
EXOSC7	2	5	9	5	0	0	0	0	7	12	3	3	0	4	11	5
EXOSC8	3	8	12	7	0	0	1	1	5	7	0	2	1	2	5	5
EXOSC9	36	46	57	51	9	6	13	9	89	66	25	25	185	130	299	137
EXT1	10	7	11	13	8	5	10	12	17	18	4	8	8	7	5	4
EXT2	13	14	22	15	1	0	2	1	75	68	22	37	26	22	10	16
EXTL2	273	380	96	116	14	15	47	32	235	113	42	46	129	139	34	16
EZH2	1	8	2	4	0	0	1	3	11	11	6	0	6	8	12	4
EZR	7	7	5	3	2	0	1	1	175	182	28	73	17	41	54	53
F2R	10	14	10	7	0	0	0	0	1	0	0	0	0	0	0	0
FADS1	12	20	13	13	0	1	1	1	22	24	6	9	0	4	1	2
FADS2	15	18	18	5	0	0	2	1	0	0	0	0	0	0	1	0
FADS3	3	4	7	2	1	0	0	0	37	45	5	14	6	11	4	2
FAF1	0	0	0	0	0	0	0	0	3	6	6	12	0	3	1	5
FAF2	13	27	16	11	3	3	7	11	40	44	13	18	4	14	27	31
FAH	14	21	18	5	0	0	0	1	7	5	1	2	0	6	2	1
FAHD2A	1	2	5	4	0	1	1	0	15	20	1	8	1	1	0	5
FAIM	1	3	6	1	0	0	0	0	23	17	1	6	0	2	2	2
FAM107B	0	4	2	2	0	0	0	0	18	15	0	6	2	5	3	2
FAM120A	5	8	9	3	1	0	0	0	21	10	4	10	1	5	2	4
FAM133A	0	1	0	0	0	0	0	0	10	6	1	4	1	7	4	13
FAM135A	0	0	2	0	0	0	0	0	3	2	1	2	1	2	6	13
FAM136A	7	8	14	10	1	2	1	2	15	13	2	6	0	4	6	2
FAM13B	19	35	3	16	2	2	4	7	46	29	11	21	25	45	37	33
FAM151B	0	0	0	1	0	0	0	0	12	4	2	3	0	3	3	0
FAM162A	58	75	38	24	5	1	2	2	373	547	65	166	48	82	45	51
FAM174C	16	19	28	7	2	0	1	0	23	28	6	11	2	5	2	10
FAM177A1	8	9	10	4	2	2	3	2	12	12	0	4	2	3	4	9
FAM184A	0	0	0	1	0	0	0	0	6	1	0	3	2	10	8	2
FAM193B	0	0	0	0	0	0	0	1	1	3	3	3	0	5	13	8
FAM200A	9	10	13	3	19	8	34	30	2	5	5	6	11	10	17	10
FAM200B	39	53	22	17	4	5	5	1	20	14	5	7	5	6	5	4
FAM204A	8	18	14	6	1	1	3	1	96	62	14	29	21	40	63	47
FAM20C	16	10	15	11	1	2	2	2	1	1	0	0	0	0	0	0
FAM216A	8	7	18	7	0	2	1	0	59	54	8	22	26	24	6	4
FAM221A	0	0	0	0	0	0	0	0	2	10	0	0	0	0	0	1
FAM32A	6	14	17	7	2	0	3	1	18	28	7	13	5	6	7	10
FAM3A	5	12	12	3	0	0	0	0	15	30	1	9	2	3	3	6
FAM50A	15	23	15	7	0	0	2	1	31	41	4	17	2	6	17	27
FAM78A	5	11	2	3	2	4	1	4	0	0	0	0	0	0	0	0
FAM92A	11	15	22	12	0	1	0	2	44	62	4	13	1	3	7	11
FANCI	6	8	5	3	2	0	4	1	16	9	1	10	1	1	5	1
FANCL	2	4	2	4	0	0	0	0	11	7	1	3	3	4	3	3
FARSA	5	2	13	2	0	1	1	0	11	16	0	3	1	0	3	4
FARSB	22	16	76	17	4	0	2	6	22	13	6	5	7	7	7	2
FASN	5	2	6	0	0	0	0	0	11	5	3	4	2	5	0	1
FASTK	46	62	40	30	1	0	1	0	46	80	2	15	21	13	7	4
FASTKD1	4	5	6	6	1	0	0	0	18	19	5	9	2	4	2	2
FASTKD2	16	11	9	5	0	1	0	2	27	36	5	20	4	10	8	14
FAT1	2	3	3	4	0	0	0	0	20	12	3	7	2	3	7	5
FAU	94	106	111	67	8	2	12	4	259	330	54	150	74	112	103	126
FBL	56	75	73	50	2	2	4	0	232	262	27	68	9	47	43	46
FBLIM1	39	54	47	49	4	12	8	2	6	2	0	2	0	0	0	0
FBLN1	4	9	7	0	0	3	0	0	14	14	4	9	4	11	9	6
FBN3	0	0	0	0	0	0	0	0	12	14	5	14	4	7	12	10
FBXO17	16	10	17	1	0	0	0	0	0	4	1	1	0	0	1	0
FBXO22	6	6	10	6	0	0	0	0	12	12	5	3	12	3	10	3
FBXO3	4	4	3	4	2	2	2	1	7	3	0	5	5	3	21	21
FBXO32	7	6	10	4	1	1	4	2	39	38	6	17	8	16	15	18
FBXO38	0	2	4	1	0	1	1	5	2	2	1	2	2	3	6	10
FBXO4	1	2	3	2	0	0	1	0	15	18	2	4	0	1	3	4
FBXO7	18	24	23	11	0	0	0	1	20	16	3	3	0	4	7	6
FBXO9	1	3	11	5	1	0	0	0	32	22	7	7	0	9	8	13
FBXW11	4	10	6	2	2	0	0	2	8	16	3	4	0	4	6	13
FBXW5	4	4	11	9	0	1	0	1	12	18	1	3	3	7	4	1
FBXW7	0	3	1	2	0	0	0	0	3	2	2	9	1	22	34	50
FCGRT	10	11	15	7	1	1	1	0	2	3	0	0	1	1	1	1
FCHO2	23	24	16	31	7	2	6	2	2	2	1	1	0	0	1	0
FCHSD2	1	10	1	3	0	0	0	0	7	7	0	0	2	2	0	0
FCSK	1	0	1	0	0	0	0	0	11	17	4	4	1	7	8	1
FDFT1	41	54	57	29	2	0	1	2	27	24	1	9	2	3	3	6
FDX1	6	5	10	2	0	0	0	1	9	13	0	4	1	3	0	2
FEN1	12	15	19	10	0	0	0	0	8	13	0	0	0	0	0	3
FEZ2	6	17	11	9	0	0	1	1	22	18	7	6	0	10	9	4
FGF5	1	0	0	0	0	0	0	0	6	12	1	4	0	0	1	0
FGFR1	2	2	2	2	0	0	0	0	14	10	5	7	2	2	1	2
FGGY	0	1	3	1	0	0	0	1	48	45	7	14	2	10	6	3
FH	8	12	35	16	0	0	1	2	26	31	5	14	2	5	7	1
FHL1	6	10	36	10	0	0	0	1	1	4	0	1	0	0	0	2
FHL2	81	82	49	28	3	1	5	5	73	102	19	28	10	9	9	8
FIG4	0	3	2	0	0	0	0	0	12	6	3	1	2	2	2	2
FILIP1L	10	7	13	9	2	2	0	3	7	4	0	2	0	1	0	0
FIS1	24	41	60	22	0	1	0	0	92	94	8	43	0	7	1	4
FKBP10	11	15	13	8	0	0	0	0	49	38	10	21	3	11	20	23
FKBP11	16	14	16	10	3	2	3	3	23	14	4	8	4	19	5	3
FKBP15	1	2	3	4	0	0	2	0	13	8	1	8	1	1	3	4
FKBP4	7	25	31	24	1	0	1	0	12	22	1	7	0	1	4	2
FKBP7	11	11	19	10	0	0	0	0	9	4	1	5	2	3	3	2
FKBP8	16	15	24	8	3	2	0	1	55	53	10	32	14	20	30	23
FKTN	0	0	1	0	0	0	0	0	10	4	1	5	0	1	2	0
FLII	6	9	13	8	0	0	1	0	29	26	2	10	1	13	8	17
FLNA	14	29	30	32	2	1	0	1	35	34	8	24	11	20	15	16
FLNB	4	8	3	1	0	0	0	0	7	10	6	5	14	9	9	1
FLOT1	115	150	97	57	7	1	6	5	18	27	5	14	0	8	2	9
FLOT2	9	19	14	8	2	0	0	0	22	32	5	18	2	16	7	7
FLRT3	0	0	1	0	0	0	0	0	16	15	6	6	4	17	9	15
FLYWCH2	8	4	14	4	0	0	0	0	18	18	0	1	0	2	1	1
FMC1	4	4	4	3	2	1	1	0	21	21	4	3	2	6	3	2
FMN2	0	0	0	0	0	0	0	0	21	28	6	7	7	4	10	18
FMR1	24	36	19	19	12	11	15	15	75	36	20	31	146	132	142	81
FN1	49	64	64	42	10	8	3	7	510	539	165	372	112	261	135	228
FN3K	0	0	1	0	0	0	0	0	9	10	1	1	0	3	0	0
FN3KRP	7	7	7	8	0	0	0	1	10	11	2	4	0	2	4	1
FNBP1	8	19	2	8	2	0	1	0	14	12	3	5	3	4	3	7
FNBP4	16	12	7	8	4	4	3	10	64	48	22	40	58	87	117	89
FNDC3A	1	1	2	1	20	31	29	43	0	1	1	3	0	3	6	1
FNDC3B	8	8	5	7	1	3	3	2	12	18	7	15	3	14	6	13
FNIP2	1	3	2	2	0	0	0	0	4	3	10	33	2	1	2	7
FNTA	10	14	11	9	0	1	1	2	21	8	5	7	6	11	8	9
FOLR1	0	0	2	0	0	0	0	0	9	25	2	6	3	6	4	8
FOPNL	8	10	7	4	0	1	0	0	6	16	2	6	0	6	3	2
FOSL1	13	18	11	5	1	1	0	1	4	6	0	3	2	1	2	2
FOSL2	0	4	2	0	1	0	0	0	17	13	4	8	2	2	4	4
FOXF2	11	11	2	1	0	0	0	0	0	1	0	0	0	0	1	0
FOXRED1	1	4	6	1	0	0	1	1	13	17	0	3	0	3	3	4
FPGS	3	7	9	12	1	0	1	0	12	12	1	4	1	3	2	4
FPGT	9	7	25	7	1	0	0	1	4	3	2	4	1	2	2	0
FRA10AC1	10	11	15	4	1	1	3	4	30	11	4	5	11	12	4	3
FRG1	14	10	12	8	2	1	0	2	4	11	1	4	0	2	2	2
FRMD6	2	0	2	0	0	2	1	2	3	2	4	11	3	9	31	61
FRS2	2	2	2	0	3	1	2	4	6	5	5	5	2	10	6	8
FSCN1	4	12	21	10	0	1	1	0	0	0	0	1	0	0	0	0
FSTL1	4	6	8	9	0	1	0	0	15	18	1	9	0	1	2	6
FSTL3	0	0	2	1	0	0	0	0	16	15	1	7	1	2	2	4
FSTL5	1	0	0	0	0	0	0	0	64	68	26	71	19	29	21	21
FTSJ1	1	8	11	8	0	2	1	0	11	19	1	4	0	2	1	2
FTSJ3	95	68	84	45	0	0	1	3	158	154	29	45	62	54	45	27
FUBP1	11	9	11	8	1	2	7	6	6	5	3	1	0	6	6	10
FUNDC2	3	15	14	5	2	0	1	0	32	45	7	16	0	2	6	11
FUOM	0	0	0	0	0	0	0	0	35	48	3	14	7	16	3	13
FUS	23	27	33	17	2	1	0	1	74	46	14	32	7	20	5	15
FXR1	54	46	51	25	9	9	18	22	110	64	17	41	13	32	52	35
FYN	1	0	0	0	8	6	13	8	0	0	0	0	1	1	0	0
FYTTD1	12	8	16	15	0	0	0	0	13	13	3	7	0	5	7	8
FZD6	0	3	2	1	0	0	0	0	10	7	1	7	4	4	3	4
G2E3	1	0	1	3	0	0	0	0	3	12	1	2	5	2	5	5
G3BP1	11	14	9	5	0	0	0	0	10	16	1	6	0	3	8	3
G3BP2	14	8	5	9	1	1	2	0	18	20	5	7	7	11	16	25
G6PC3	19	29	41	19	1	2	1	0	35	47	6	18	8	13	16	4
G6PD	88	124	130	77	2	3	2	3	127	167	24	72	18	41	39	35
GAA	7	10	11	6	0	0	0	0	11	9	2	3	1	6	1	9
GABARAP	127	184	195	110	4	3	4	6	320	357	30	110	6	33	29	48
GABARAPL1	15	20	6	4	1	0	0	1	17	13	2	8	1	4	12	12
GABARAPL2	188	289	220	133	6	10	10	18	621	648	100	235	18	151	75	73
GABRA2	13	23	24	16	0	2	1	3	4	1	1	2	1	0	1	1
GADD45A	6	6	7	2	1	0	0	0	9	1	6	0	8	5	30	8
GADD45B	1	3	2	0	0	0	0	1	10	9	3	12	6	40	72	110
GADD45GIP1	2	9	11	3	0	0	1	0	32	50	2	22	1	10	6	3
GALE	7	10	10	6	1	0	2	0	19	23	2	8	0	1	2	2
GALK1	5	11	8	2	0	0	0	0	13	15	1	7	0	0	1	2
GALNS	8	15	7	10	1	0	0	0	0	6	1	4	1	1	5	4
GALNT11	9	11	11	4	1	0	1	1	29	36	10	16	1	7	9	7
GALT	9	4	5	4	0	0	0	0	6	14	1	2	0	0	1	0
GAMT	17	24	16	16	2	0	0	0	35	48	4	20	1	8	5	5
GANAB	10	18	16	9	0	0	0	2	9	8	1	9	1	1	2	6
GAPVD1	2	3	4	1	1	0	1	2	12	19	3	9	14	30	22	32
GARS1	26	34	44	16	2	0	0	1	89	100	15	23	4	18	16	43
GART	14	18	28	27	1	3	6	4	62	57	14	33	4	27	57	21
GATB	4	3	4	0	0	0	0	0	4	12	3	7	5	1	7	6
GATD1	13	10	11	9	0	0	0	1	0	2	0	0	0	0	1	0
GBE1	23	32	25	17	1	0	0	2	10	10	2	8	0	1	2	4
GBP1	30	38	58	40	5	5	7	8	1	0	0	1	0	0	1	0
GCA	1	1	2	1	12	2	12	8	1	1	0	1	0	1	1	1
GCC2	5	8	6	5	0	3	0	1	11	2	1	5	6	6	14	6
GCLM	16	23	4	3	0	0	0	0	10	13	1	3	0	2	2	1
GCSH	15	21	19	10	1	0	0	1	24	29	1	11	2	3	3	5
GDE1	6	23	22	12	0	0	1	0	48	70	13	34	3	20	17	26
GDF15	2	6	1	1	1	0	0	1	16	18	6	13	2	5	6	16
GDI1	5	11	11	12	0	1	1	0	15	24	0	4	3	7	7	16
GDI2	12	11	20	6	0	2	0	0	39	32	12	14	3	11	8	10
GEMIN5	5	2	4	2	0	1	2	0	8	15	3	2	2	2	2	5
GET1	3	10	6	5	1	0	0	0	34	32	5	10	8	8	9	10
GET3	10	15	11	12	0	2	0	1	29	28	9	19	3	16	12	22
GET4	4	8	7	1	5	1	8	10	17	20	3	10	0	7	8	11
GFER	5	9	12	5	1	0	1	0	8	4	0	4	1	0	2	1
GFM1	7	9	18	4	3	0	0	2	23	18	3	13	2	1	5	16
GFM2	12	16	22	19	1	2	3	1	16	17	5	6	0	12	7	9
GFPT1	11	12	18	9	1	0	2	2	27	22	8	10	13	15	8	12
GGA3	1	0	1	0	0	0	0	1	6	5	1	7	1	3	4	13
GGH	23	36	17	15	2	2	0	2	7	9	3	6	3	4	0	2
GGNBP2	59	54	46	18	4	2	8	10	175	56	34	43	157	104	248	119
GHITM	72	103	107	80	6	7	10	11	358	412	74	204	38	183	102	133
GID4	1	0	0	0	1	1	1	1	19	20	4	3	6	5	13	4
GID8	12	10	12	9	0	0	0	0	16	31	1	7	0	1	9	5
GIGYF2	11	13	14	16	8	6	13	19	27	21	3	15	2	14	11	13
GINM1	5	11	16	4	2	1	0	7	12	16	2	9	1	3	6	7
GINS1	0	1	1	0	0	0	1	0	0	17	2	3	0	1	1	1
GINS2	6	5	19	15	0	0	1	0	2	2	0	0	0	0	0	1
GLA	31	21	40	13	2	2	0	0	26	13	4	8	5	5	26	11
GLB1	13	10	13	2	1	0	1	1	16	26	1	10	0	1	3	6
GLB1L3	0	0	0	0	2	0	0	0	16	19	0	11	1	4	3	8
GLG1	8	11	11	5	2	0	1	0	20	27	5	12	9	13	10	7
GLIPR1	20	33	53	16	3	1	0	1	1	1	2	5	2	2	1	3
GLO1	17	29	27	16	0	1	1	0	32	23	8	12	2	6	7	10
GLOD4	4	12	14	5	0	1	0	0	22	21	1	11	0	2	3	8
GLRX	35	47	29	20	0	0	0	0	5	7	0	1	1	0	1	0
GLRX2	15	16	16	11	0	0	0	0	25	30	1	2	1	1	4	3
GLRX3	20	32	31	30	3	1	0	0	56	64	8	26	1	8	14	17
GLT8D1	11	13	9	8	1	0	2	0	26	14	4	7	1	2	3	3
GLT8D2	3	10	1	5	0	0	0	0	2	3	1	1	1	2	3	3
GMFB	5	13	11	7	7	3	10	11	14	10	4	6	9	8	10	20
GMFG	10	6	8	4	0	0	0	0	6	3	0	0	0	2	0	0
GMPPA	4	7	12	1	0	0	0	0	12	18	0	3	0	6	0	2
GMPPB	1	5	9	4	0	0	0	0	11	17	1	5	0	3	0	4
GMPR2	2	8	3	4	0	0	0	1	27	27	7	12	0	7	5	3
GMPS	13	9	13	10	1	3	2	0	24	12	4	4	3	2	1	4
GNAI1	10	23	29	15	1	0	1	2	29	26	9	9	11	13	18	24
GNAI2	10	13	4	6	0	0	0	0	12	15	4	6	5	4	5	4
GNAI3	5	11	11	9	1	0	1	0	9	8	1	3	0	1	5	4
GNB2	10	7	14	3	0	0	1	0	12	14	6	9	4	1	2	3
GNG10	17	26	21	11	2	1	1	1	123	120	36	49	17	30	44	66
GNG11	68	107	97	52	2	1	2	3	14	23	2	9	0	4	4	1
GNL1	2	8	8	2	0	0	1	0	15	14	1	8	0	3	3	4
GNL2	13	20	27	6	2	1	5	1	35	17	9	14	67	23	52	18
GNL3	32	36	54	17	0	2	2	4	49	53	17	22	11	24	52	44
GNPDA1	7	6	9	4	0	0	0	0	23	17	4	10	0	2	4	3
GNPDA2	4	1	2	1	0	0	0	0	16	17	5	5	2	9	6	3
GNPNAT1	3	4	0	2	0	0	0	0	11	8	1	2	1	2	3	3
GNPTAB	9	9	11	11	0	0	0	0	6	3	0	4	2	1	1	1
GNPTG	11	32	33	5	2	2	4	1	17	16	3	4	0	1	6	3
GOLGA4	458	513	414	332	21	13	40	28	687	454	159	235	523	692	455	214
GOLGA5	4	2	3	3	2	0	1	0	10	8	2	4	0	2	1	3
GOLGA7	7	8	8	5	0	0	0	4	9	14	2	7	0	5	2	3
GOLGB1	19	32	29	13	1	1	2	8	40	28	5	8	6	16	10	12
GOLIM4	3	9	7	2	0	0	0	0	11	15	2	6	2	9	7	9
GOLM1	2	2	4	0	0	0	0	0	72	53	16	24	10	28	22	20
GORASP2	18	27	17	16	0	1	1	0	10	17	1	1	0	0	1	5
GOSR1	2	5	3	1	1	0	2	0	11	12	3	7	1	5	2	3
GOT1	4	11	9	7	2	1	0	0	17	18	2	4	1	0	2	1
GOT2	11	20	21	13	0	1	0	0	53	60	8	30	1	12	4	5
GPAA1	82	113	117	90	4	1	8	7	90	147	25	47	41	57	20	15
GPAT3	12	19	17	9	0	0	0	2	23	11	8	6	10	3	9	11
GPAT4	6	5	9	4	1	1	1	2	4	17	1	1	0	2	3	5
GPATCH1	0	1	2	3	2	1	1	1	16	15	6	7	1	11	35	20
GPATCH3	1	1	1	0	0	0	0	0	713	646	215	551	365	684	469	531
GPATCH4	8	5	23	6	2	2	0	0	12	8	1	4	0	2	0	3
GPBP1	69	65	47	43	72	46	75	91	50	37	22	27	82	162	231	176
GPC1	6	8	10	6	0	0	0	0	2	2	2	3	0	1	3	0
GPC4	0	0	0	0	0	0	0	0	29	37	7	24	3	13	6	15
GPI	15	41	36	15	3	0	0	2	58	81	6	31	6	20	8	18
GPN1	3	6	10	2	0	0	1	0	5	15	1	4	1	2	4	2
GPN2	4	5	7	2	0	0	0	0	12	7	0	2	0	0	0	1
GPN3	1	0	3	1	0	0	0	0	6	11	1	0	0	2	1	4
GPNMB	0	2	3	0	0	0	0	0	64	65	27	44	12	20	16	37
GPR108	8	5	10	3	0	1	2	4	10	8	4	6	1	6	9	16
GPR137	10	4	10	5	0	1	1	3	3	5	0	4	0	1	2	1
GPRC5B	1	0	1	0	1	0	0	0	5	10	2	3	1	0	0	2
GPRC5C	3	5	4	2	0	0	0	0	8	12	1	1	0	2	1	0
GPS1	13	16	30	14	1	0	2	2	39	52	6	21	4	12	14	21
GPS2	13	18	22	14	1	1	2	0	10	12	1	4	0	4	9	3
GPT2	1	4	3	0	0	0	0	0	41	31	4	9	20	23	6	4
GPX1	10	11	21	17	1	0	0	0	56	70	11	19	3	14	24	32
GRB2	12	17	20	4	1	1	1	1	18	16	1	2	1	2	3	4
GRB7	0	0	0	0	0	0	0	0	8	10	0	1	0	5	7	7
GRHPR	26	34	35	18	1	0	2	1	55	64	8	32	3	14	3	8
GRIK2	12	7	11	13	0	0	0	3	1	0	0	1	1	0	0	0
GRINA	22	35	26	16	1	0	1	1	5	5	0	0	1	6	5	11
GRIPAP1	0	3	1	4	0	0	0	0	14	7	2	1	0	2	1	4
GRN	104	140	119	70	2	3	4	4	258	242	56	133	124	166	184	196
GRPEL1	9	5	9	5	0	0	1	1	8	10	1	1	0	0	4	1
GRSF1	7	20	20	10	0	0	1	0	53	29	6	11	33	16	14	10
GSDMD	15	15	13	7	1	2	1	3	11	12	2	6	0	0	2	1
GSK3B	19	22	21	10	22	16	47	50	12	5	5	17	12	11	32	16
GSN	19	41	35	19	1	1	0	1	55	54	8	20	2	3	4	11
GSPT1	11	4	12	7	0	1	1	1	15	10	5	12	2	5	2	5
GSS	28	29	53	19	6	2	1	0	17	14	1	12	0	3	1	5
GSTK1	21	26	40	13	0	2	1	0	54	75	11	24	5	11	5	10
GSTM3	5	12	6	4	0	0	1	0	0	0	0	1	0	0	0	0
GSTM4	6	11	4	1	0	0	0	0	1	1	0	1	0	0	0	1
GSTP1	176	187	254	136	11	3	2	3	485	605	67	241	17	126	88	119
GTF2A1	17	20	21	26	0	0	0	0	42	41	8	23	32	26	12	6
GTF2B	62	47	38	18	6	3	20	13	415	320	54	78	291	171	410	284
GTF2F2	20	17	45	26	0	0	1	3	15	9	1	1	4	3	5	2
GTF2H1	8	19	14	6	4	3	10	9	14	16	10	14	3	20	45	46
GTF2H4	2	1	7	4	0	0	0	0	14	11	2	2	0	5	4	5
GTF2H5	4	13	10	6	0	0	1	0	55	65	8	24	2	17	13	12
GTF2I	11	18	9	6	1	0	1	1	16	20	3	5	0	5	7	2
GTF3A	20	35	43	21	1	0	0	2	43	56	8	24	2	5	21	22
GTF3C2	1	5	3	1	2	0	0	0	13	13	1	2	0	1	1	0
GTF3C6	10	18	31	9	0	0	0	1	125	141	26	53	7	24	32	39
GTPBP10	2	4	6	2	1	0	0	0	3	5	2	1	2	2	8	11
GTPBP4	11	11	13	8	6	0	8	1	73	33	16	14	2	36	92	56
GTSE1	12	19	14	9	0	0	1	0	29	26	8	13	3	8	6	3
GUF1	31	50	41	49	15	5	21	13	373	331	137	186	202	320	338	233
GUK1	59	90	112	62	10	3	4	1	51	56	7	26	4	17	21	16
GYPC	17	14	12	8	3	0	3	6	21	26	3	7	1	11	4	9
H1-0	3	5	0	1	0	0	0	1	12	17	1	5	0	1	1	4
H2AJ	1	0	0	0	0	0	0	0	46	77	3	15	1	4	11	8
H2AZ2	59	89	68	42	3	2	0	2	322	351	38	130	35	69	40	49
HACD1	100	63	212	52	2	2	4	5	21	7	3	6	6	5	4	4
HACD3	8	17	27	15	0	1	1	0	17	16	2	12	0	2	4	4
HACE1	10	18	10	6	0	0	1	0	37	31	4	14	4	9	14	16
HACL1	14	12	18	4	1	0	1	2	21	20	2	4	3	5	1	0
HADH	8	3	6	6	0	0	0	1	13	11	0	4	0	2	1	1
HADHA	28	32	28	31	2	0	0	1	22	38	4	31	1	16	17	19
HADHB	17	12	17	8	0	1	2	1	26	19	17	32	7	20	14	16
HAGH	7	16	13	7	1	2	1	0	29	30	7	7	3	6	5	4
HAGHL	4	4	10	6	0	0	0	0	1	2	0	0	0	0	0	0
HARS1	5	16	22	18	0	4	16	15	9	12	0	2	0	3	6	5
HARS2	5	6	10	5	0	0	0	1	5	4	0	0	0	1	4	3
HAT1	18	16	37	12	3	5	0	4	23	24	13	9	13	11	15	13
HAUS6	0	0	0	3	0	1	0	0	13	7	2	4	11	7	7	6
HAVCR1	0	3	5	2	3	0	1	2	841	881	291	347	171	208	177	150
HAX1	20	22	32	14	3	2	3	0	19	28	5	9	0	3	5	6
HBEGF	12	23	5	3	2	1	5	1	31	29	14	16	8	13	28	20
HBP1	2	10	2	3	4	3	4	3	3	0	0	2	0	7	5	2
HBS1L	5	11	5	1	0	1	2	3	7	26	0	6	0	2	4	13
HCFC1R1	13	28	22	9	2	1	0	0	65	78	5	23	2	23	16	25
HDAC2	81	89	147	69	4	4	5	3	235	124	32	52	24	26	50	44
HDAC5	9	18	14	6	0	2	4	1	41	65	10	29	22	34	35	41
HDDC2	16	22	21	13	0	1	0	0	40	65	6	16	2	7	3	14
HDDC3	0	0	1	2	0	0	0	0	7	10	2	0	0	2	0	0
HDGF	9	25	17	10	1	2	0	0	23	29	5	15	4	6	3	11
HDGFL2	44	65	34	56	16	11	16	15	11	7	1	2	1	2	1	1
HDGFL3	7	16	20	14	1	3	2	2	22	13	5	12	4	11	4	10
HDLBP	61	67	73	48	4	0	1	2	132	127	33	70	32	63	21	40
HEATR1	1	4	8	1	0	0	0	1	22	15	5	12	16	15	23	20
HEATR6	4	6	4	6	2	0	1	0	16	14	3	6	4	10	14	8
HEBP1	29	46	54	15	2	0	2	0	21	21	4	6	0	5	0	7
HEBP2	10	6	7	3	0	1	0	0	40	55	8	15	7	22	11	9
HECTD1	3	7	3	5	0	0	0	0	7	10	2	3	3	3	2	2
HELQ	0	1	0	2	1	1	1	0	3	2	3	8	3	12	11	7
HELZ	3	5	7	2	2	1	2	2	31	9	3	16	3	10	12	9
HERC1	7	5	4	3	0	0	0	1	12	3	6	12	1	2	9	3
HERC2	6	12	9	9	3	3	3	2	10	10	2	4	4	4	6	4
HERC5	0	1	2	1	50	39	127	109	0	1	0	1	1	4	4	5
HERC6	1	0	3	1	8	10	9	17	1	1	0	0	1	0	2	1
HERPUD1	26	53	14	13	2	0	1	2	57	62	3	15	1	9	15	22
HES1	0	1	0	0	0	0	0	0	1	0	0	2	1	5	6	11
HEXB	38	49	48	35	3	2	1	3	60	70	16	27	38	61	21	38
HEXIM1	6	7	1	9	0	0	2	0	12	9	6	7	1	6	10	6
HGS	8	2	24	10	0	0	0	0	12	9	0	6	0	5	4	6
HIBADH	17	29	46	21	0	3	1	1	15	15	5	8	3	7	3	5
HIBCH	6	7	4	2	0	0	1	1	4	12	1	4	0	3	0	1
HIF1A	20	25	7	8	3	1	1	3	30	26	4	19	28	22	28	61
HIF1AN	1	1	7	5	0	0	0	0	8	10	1	3	0	1	0	2
HIKESHI	7	14	13	12	3	2	8	3	24	30	6	9	0	11	10	6
HINT1	138	191	191	96	11	8	9	9	194	261	31	100	16	70	64	93
HINT2	13	17	23	14	1	0	1	0	44	83	8	15	3	14	11	21
HIRIP3	3	9	1	2	0	0	0	0	10	8	1	0	1	0	1	5
HK1	13	18	14	14	0	0	0	0	3	3	0	1	0	1	3	1
HKDC1	0	0	0	0	0	0	0	0	33	33	7	15	2	10	6	11
HLA-F	3	6	8	2	5	3	13	6	0	0	0	0	0	0	0	0
HLTF	1	3	1	4	1	0	0	0	12	28	11	24	15	23	14	12
HM13	48	66	90	55	8	3	3	3	32	51	10	27	4	12	10	16
HMBS	13	15	14	9	0	0	0	0	5	8	0	3	1	1	2	2
HMCES	12	3	10	4	0	0	1	0	5	7	2	2	0	1	2	2
HMG20B	4	12	8	2	0	0	0	0	6	16	2	6	0	6	3	5
HMGA1	11	21	22	3	1	1	0	1	137	167	15	67	16	47	26	16
HMGB2	39	43	37	21	2	2	4	2	206	124	32	57	42	54	84	57
HMGCL	9	7	23	11	0	0	0	1	13	13	2	4	0	2	2	2
HMGCS1	13	12	15	12	0	0	1	0	1	3	1	0	1	0	3	2
HMGN1	14	32	34	21	1	0	2	2	85	113	23	45	5	36	21	42
HMGN3	3	10	7	5	0	0	1	0	14	20	3	9	2	3	5	10
HMGN4	6	1	4	6	1	0	0	1	53	60	19	31	32	19	15	12
HMMR	39	68	37	36	2	5	4	5	20	22	1	4	5	10	16	7
HMOX1	6	15	0	0	0	0	0	0	25	47	1	10	1	3	13	4
HNF1B	0	0	0	0	0	0	1	0	30	34	2	8	2	3	6	5
HNRNPA1	46	61	76	41	3	4	5	6	427	493	103	250	32	220	269	392
HNRNPC	36	28	35	30	9	7	19	14	107	111	26	65	11	50	46	67
HNRNPD	11	15	5	8	2	2	4	4	20	23	8	13	10	28	54	30
HNRNPDL	22	30	33	15	2	1	1	5	67	85	13	32	23	33	82	67
HNRNPH1	18	29	18	28	1	1	1	1	43	51	7	13	6	15	24	27
HNRNPH3	15	16	17	9	2	1	5	4	46	23	10	13	19	20	97	72
HNRNPL	6	13	10	7	0	0	0	0	180	241	33	89	11	23	31	39
HNRNPLL	11	13	8	3	2	0	1	4	12	11	1	5	1	2	13	12
HNRNPM	22	31	26	33	1	2	5	0	66	56	14	22	9	16	26	36
HNRNPR	17	29	44	27	2	0	0	0	37	40	5	14	1	7	7	6
HNRNPU	90	98	107	74	5	7	8	5	271	160	31	63	19	100	114	69
HNRNPUL1	4	11	7	6	1	0	1	0	21	19	4	6	5	10	2	4
HOOK1	0	0	0	0	0	0	0	0	13	9	5	2	6	3	12	8
HP1BP3	14	29	13	16	0	1	0	2	17	13	0	12	1	12	9	11
HPCAL1	12	21	24	7	1	1	0	0	1	3	0	0	0	2	0	1
HPF1	5	3	15	8	0	1	0	1	13	5	1	1	2	1	8	5
HPGD	13	19	4	6	0	0	0	1	1	0	0	0	1	0	0	0
HPRT1	14	13	16	8	1	1	1	0	46	51	13	25	0	7	7	6
HRAS	5	6	6	4	1	0	0	0	10	25	2	5	0	2	7	6
HS1BP3	1	3	2	2	0	0	0	0	14	13	4	9	0	4	6	8
HS3ST1	0	0	0	1	0	0	0	0	36	38	1	1	0	0	0	3
HSBP1L1	12	20	13	5	0	0	0	0	75	75	9	26	1	7	14	16
HSCB	12	11	11	2	32	16	88	66	58	30	6	14	9	22	19	14
HSD17B10	11	13	10	6	0	0	0	0	56	74	8	19	4	16	13	18
HSD17B11	2	7	1	2	1	0	0	1	20	22	6	13	3	3	2	4
HSD17B12	1	3	2	1	0	0	0	0	11	11	1	2	0	1	4	6
HSD17B2	0	2	1	1	0	1	0	0	15	10	0	8	0	0	0	1
HSD17B4	9	8	11	4	0	0	2	0	32	27	7	9	2	12	6	11
HSDL2	2	6	10	2	0	2	2	1	452	298	106	123	344	161	86	45
HSF1	35	41	66	27	1	0	3	2	101	66	4	15	1	7	6	20
HSP90AB1	91	168	212	147	4	1	2	6	498	616	93	291	81	151	143	228
HSP90B1	111	117	122	61	4	1	4	1	254	201	39	120	151	250	109	125
HSPA14	10	8	6	3	2	4	0	0	11	10	4	0	3	5	14	14
HSPA4	58	69	64	44	7	7	11	10	184	167	36	67	69	81	184	143
HSPA5	947	1123	552	447	34	16	25	19	3651	2895	883	1386	1725	2170	847	648
HSPA8	542	694	1808	1230	44	26	53	82	707	722	134	323	123	201	199	229
HSPA9	69	63	74	49	5	3	6	11	324	192	66	114	81	106	90	104
HSPB1	81	136	253	99	12	6	4	3	135	158	12	41	0	14	20	26
HSPB11	70	87	89	80	11	15	15	8	6	12	0	3	0	3	2	0
HSPBP1	6	3	7	5	0	0	1	0	4	10	2	6	0	1	3	1
HSPD1	108	162	212	126	0	3	2	3	363	288	108	154	74	244	131	108
HSPE1-MOB4	1	0	2	0	1	0	0	0	13	11	3	5	0	4	4	5
HSPH1	34	50	41	35	3	1	3	3	17	7	1	1	7	10	16	6
HTATIP2	0	0	0	0	1	0	0	1	12	11	3	4	1	3	1	2
HTATSF1	14	13	19	14	0	0	0	1	56	40	12	20	9	21	23	25
HTRA1	3	5	6	6	1	0	0	0	10	2	4	3	3	3	2	2
HTRA2	7	18	16	6	0	0	0	0	8	13	0	3	0	2	4	1
HTT	0	0	2	0	0	0	0	0	10	6	1	6	0	1	1	0
HUWE1	2	2	3	3	1	2	0	2	14	8	4	4	4	6	1	3
HYAL1	0	0	0	0	0	1	0	0	38	34	1	11	0	8	4	1
HYI	10	19	20	6	1	0	0	0	13	7	0	4	3	0	1	1
HYOU1	11	16	19	9	0	1	0	2	6	4	0	6	0	11	0	2
IAH1	11	20	24	12	2	1	0	0	73	82	17	31	44	24	26	19
IARS1	8	9	8	3	0	0	0	1	19	11	3	9	1	7	0	6
IARS2	79	58	128	50	3	0	1	2	203	83	78	46	42	25	29	12
ICE1	9	10	10	4	0	1	1	1	15	5	1	6	4	12	15	6
ID1	54	44	13	1	0	0	0	0	1	7	1	1	0	0	0	2
ID2	8	24	4	0	1	0	2	1	11	17	1	3	0	0	2	8
ID3	152	226	73	41	0	0	0	2	11	6	0	1	0	2	0	3
IDH1	14	20	16	8	1	0	0	0	9	13	4	3	2	3	1	2
IDH2	25	39	35	18	1	2	0	0	32	42	6	12	1	5	3	6
IDH3A	2	5	13	6	0	0	1	0	11	22	0	8	3	1	3	4
IDH3B	15	33	22	16	0	2	2	0	43	50	7	16	5	15	6	3
IDH3G	13	14	18	5	0	0	0	1	20	16	3	13	8	8	8	7
IDI1	5	17	9	10	0	0	0	1	7	7	1	3	1	2	0	4
IDNK	8	15	14	7	3	2	3	3	1	3	2	2	0	3	1	0
IER2	1	5	3	2	25	7	38	45	2	9	2	7	2	5	15	15
IER3	6	7	4	1	0	0	0	0	23	33	4	27	7	25	47	55
IFI16	4	11	28	38	2	9	2	4	11	13	6	6	0	4	5	3
IFI27L2	12	19	21	6	0	0	1	0	77	86	11	30	13	32	21	16
IFI30	14	19	18	8	1	0	0	2	10	12	0	7	1	2	6	7
IFI35	14	16	36	14	3	2	2	3	17	27	4	9	1	3	2	3
IFI44	1	2	32	38	22	18	39	30	0	0	1	8	22	42	41	53
IFI6	4	5	35	14	17	14	11	7	2	2	0	0	1	0	1	4
IFIH1	1	1	10	7	113	96	190	235	0	1	2	8	16	43	18	28
IFIT1	0	2	55	22	32	26	79	73	1	0	0	3	3	3	5	10
IFIT2	3	3	184	222	3852	2299	4649	3534	0	0	29	45	46	98	106	155
IFIT3	0	3	28	23	183	118	265	325	7	2	18	17	28	114	141	92
IFIT5	0	0	7	3	13	7	21	21	0	0	0	0	3	0	1	1
IFNAR1	1	7	4	2	0	0	2	0	9	11	0	0	0	1	3	2
IFNB1	0	0	1	1	63	50	92	89	0	0	2	0	1	3	1	1
IFNGR1	3	14	11	6	0	0	1	4	33	29	0	9	0	4	1	13
IFNGR2	6	16	18	6	0	0	0	0	6	4	2	3	2	6	2	7
IFNL1	0	0	0	0	12	4	20	18	0	0	0	0	0	0	0	0
IFRD1	20	32	44	29	12	12	22	14	11	14	6	16	10	18	56	92
IFRD2	13	18	23	9	2	2	0	1	6	9	0	2	1	3	2	1
IFT122	2	11	6	3	3	0	2	3	13	9	3	5	0	5	5	3
IFT20	8	8	11	4	1	0	2	1	30	32	4	11	6	7	6	10
IFT22	14	14	21	6	0	0	0	1	30	34	6	11	4	10	11	10
IFT27	9	13	9	4	0	0	2	0	6	4	0	4	1	1	3	1
IFT43	4	7	4	7	0	0	3	1	23	23	6	9	2	8	4	4
IFT46	4	6	4	2	1	0	1	0	10	11	2	6	1	3	2	1
IFT52	13	14	17	14	2	0	0	0	31	13	6	10	4	6	10	6
IFT57	8	11	14	6	1	0	1	0	14	14	1	2	1	4	2	2
IFT74	84	93	52	54	10	7	16	14	0	0	0	0	0	1	0	0
IFT88	6	9	8	10	1	0	0	1	13	14	4	6	6	6	2	2
IGBP1	3	3	6	2	1	0	0	1	21	32	2	14	5	13	11	14
IGF1R	4	10	7	10	1	3	2	2	21	13	7	26	4	19	13	10
IGFBP3	5	4	10	4	2	1	1	1	216	457	38	194	36	113	130	242
IGFBP5	283	544	420	501	16	22	3	10	5	5	0	3	3	3	6	4
IGFBP6	13	19	35	6	2	1	4	1	87	100	9	28	7	26	18	26
IGFBP7	20	28	31	7	4	4	3	2	6	9	3	6	2	7	3	4
IGFLR1	2	7	0	5	0	0	1	0	13	15	0	6	0	1	0	4
IK	1105	1181	1022	1029	159	77	259	189	1233	512	362	268	1244	594	1222	308
IKBIP	2	5	3	0	2	0	0	0	22	17	7	4	1	9	12	7
IL10RB	7	8	15	3	1	1	2	0	9	7	2	2	0	2	0	0
IL18	1	0	0	0	0	0	0	0	10	5	1	1	1	2	2	1
IL1A	0	0	1	0	0	0	0	0	3	3	0	1	3	7	3	11
IL1R1	0	2	0	0	6	13	22	12	0	2	2	3	0	1	0	0
IL6	0	3	2	1	13	5	13	12	22	19	6	9	8	5	16	13
IL6ST	6	8	7	5	3	2	3	2	28	34	6	26	2	12	14	14
ILF3	30	40	57	25	4	2	3	3	67	53	10	29	8	14	14	30
ILK	26	47	55	33	3	4	3	1	30	43	7	23	2	6	5	7
ILKAP	8	19	18	7	1	0	1	1	15	20	1	3	0	1	3	5
ILVBL	10	7	8	5	2	0	1	2	9	14	1	4	0	0	3	0
IMMP1L	6	9	3	7	1	0	1	0	19	30	5	3	0	5	12	6
IMMT	12	10	19	13	0	1	0	0	25	22	3	13	8	5	2	3
IMP4	6	9	12	10	0	0	1	0	16	22	1	7	2	4	3	4
IMPA2	3	2	0	0	0	0	0	0	8	12	1	2	1	1	0	0
IMPACT	1	7	8	3	0	0	1	0	11	7	1	4	1	2	0	1
IMPDH2	25	33	39	32	4	0	7	2	90	81	17	30	4	23	20	14
ING3	26	35	17	13	3	3	5	7	2	7	4	9	3	6	4	12
ING4	3	12	5	6	1	0	0	2	1	4	0	1	0	0	0	3
INHBA	0	0	0	0	1	0	0	0	72	61	7	22	2	16	6	9
INO80E	12	13	15	6	0	0	0	0	8	6	3	0	0	1	1	1
INSIG1	24	29	31	11	2	1	0	0	3	2	0	0	2	4	7	10
INSIG2	3	1	7	1	0	0	0	0	8	15	3	4	2	6	6	3
INTS1	12	8	6	4	0	0	2	0	14	18	1	13	2	2	0	1
INTS10	5	15	8	4	0	0	1	0	11	4	0	5	1	2	7	6
INTS11	10	7	11	3	2	0	0	1	14	17	6	3	0	7	3	4
INTS12	9	13	19	8	2	0	7	7	5	9	2	3	2	5	1	6
INTS14	9	7	8	10	1	1	4	6	21	17	10	2	1	5	5	7
INTS2	0	1	0	1	0	0	2	1	7	8	4	12	50	50	31	27
INTS5	3	4	11	5	1	0	1	0	13	19	3	3	1	2	0	0
INTU	0	0	0	0	0	0	1	1	4	0	1	3	3	2	12	6
IP6K2	8	21	6	4	3	1	6	2	9	8	2	9	5	8	13	9
IPO13	11	8	6	5	0	0	0	0	7	10	3	3	3	6	7	3
IPO4	1	3	8	7	0	1	0	0	23	34	8	14	4	5	7	3
IPO5	10	24	28	24	0	3	3	0	103	73	17	55	17	35	38	34
IPO7	2	8	3	6	2	2	2	0	12	11	4	4	10	17	4	2
IPO8	1	1	2	2	3	1	0	0	11	8	3	9	2	6	5	6
IPO9	3	6	10	7	1	0	2	0	8	9	4	4	1	4	2	0
IQGAP1	5	6	7	10	1	0	2	0	32	44	9	16	2	13	4	10
IQGAP2	9	10	2	4	0	0	0	0	0	1	0	0	0	1	1	1
IREB2	2	4	3	3	2	1	2	3	6	2	3	5	0	2	6	10
IRF1	0	1	6	2	36	17	49	73	1	3	1	6	10	30	25	38
IRF2	1	3	10	4	1	0	7	5	9	8	1	5	2	3	3	3
IRF3	8	7	3	8	0	0	0	1	9	18	0	4	0	2	3	2
IRF7	5	4	18	2	6	4	5	3	0	0	0	0	0	0	0	1
ISCA1	2	4	4	2	2	0	1	1	89	92	16	37	0	18	15	19
ISCA2	3	6	6	2	0	0	0	0	16	23	0	4	0	3	2	2
ISCU	7	9	18	4	0	0	0	0	51	53	12	24	33	22	46	23
ISG15	18	20	76	28	23	15	36	23	3	4	2	9	87	80	77	65
ISOC1	3	6	14	6	0	0	0	0	4	3	1	1	0	1	0	1
ISOC2	16	14	24	14	0	0	2	0	3	9	0	3	0	2	1	0
IST1	21	38	17	25	2	0	5	3	21	23	5	12	5	8	17	27
ISYNA1	2	3	5	1	0	0	0	0	18	23	1	7	0	6	3	11
ITFG1	10	12	18	10	1	0	2	0	20	29	6	7	7	11	8	10
ITGA1	3	6	5	5	10	14	5	10	63	72	17	35	16	46	28	24
ITGA2	5	3	2	4	0	1	0	1	10	5	2	10	1	7	2	2
ITGA6	23	43	21	26	0	0	0	0	6	12	1	4	5	4	1	2
ITGB1	14	26	24	25	2	0	1	0	84	82	15	48	10	24	24	43
ITGB1BP1	26	22	28	12	3	0	1	1	42	32	4	6	0	6	16	15
ITGB2	0	0	0	0	0	0	0	0	13	14	4	13	3	9	8	17
ITGB3BP	3	11	3	7	0	0	0	0	16	27	5	10	6	5	3	7
ITGBL1	1	7	10	3	4	1	0	1	0	0	0	0	1	0	0	1
ITM2B	72	98	92	54	11	7	7	7	55	51	8	40	2	9	20	39
ITM2C	18	26	28	19	1	1	1	0	8	14	2	10	0	2	1	4
ITPA	16	15	28	11	1	0	3	1	31	41	3	18	4	15	19	11
ITPRID2	24	43	36	38	2	2	0	3	9	17	7	13	5	8	12	13
ITSN1	2	8	5	9	0	4	1	1	19	16	3	8	3	2	4	3
ITSN2	1	2	2	2	0	1	2	1	23	19	3	9	8	15	16	14
IVNS1ABP	2	4	3	4	0	0	1	1	6	12	2	3	2	0	0	2
IWS1	236	373	191	289	45	26	74	72	1160	661	213	308	737	1320	2373	975
JADE1	2	6	4	2	1	0	1	1	3	6	5	11	3	2	1	5
JAK1	11	18	10	12	0	1	1	0	35	73	10	36	25	47	17	16
JAM3	0	1	1	0	0	0	0	0	23	29	6	12	1	7	9	8
JAZF1	2	5	3	2	18	5	39	36	0	0	0	0	2	2	2	3
JKAMP	12	14	9	7	0	1	1	0	12	17	1	10	1	7	8	3
JMJD1C	6	11	7	6	6	2	3	2	6	8	10	32	19	35	33	60
JMJD6	4	14	4	4	0	0	1	0	5	6	1	0	0	1	4	1
JOSD2	13	7	13	6	1	0	0	0	5	12	0	3	1	1	0	3
JTB	9	6	14	7	0	0	0	0	30	34	0	7	1	7	7	7
JUN	7	13	7	6	49	30	132	101	28	16	9	22	61	89	63	71
KANK2	1	0	1	2	0	0	0	0	8	10	4	5	1	2	1	0
KANSL1	1	3	2	2	2	0	4	2	5	9	5	13	7	13	12	16
KARS1	27	29	61	31	3	1	5	5	44	55	14	14	8	16	20	27
KAT14	2	3	1	1	0	0	0	0	5	12	2	3	1	8	5	2
KATNA1	43	67	32	52	3	8	9	11	171	167	18	46	59	76	61	44
KATNAL1	2	6	7	4	2	0	2	1	31	23	7	8	6	3	4	3
KATNB1	4	6	10	1	0	0	0	0	7	7	0	2	0	0	0	1
KATNBL1	12	11	9	10	1	1	3	0	4	3	0	0	0	1	0	0
KBTBD2	11	34	10	6	2	0	2	2	7	16	2	5	5	7	6	4
KCTD9	3	6	10	4	1	0	0	0	4	1	3	1	0	3	0	3
KDELR1	34	34	39	33	0	0	1	0	83	89	8	34	8	36	10	21
KDELR2	66	78	114	43	2	1	1	0	39	48	16	29	3	12	6	10
KDELR3	13	13	33	11	1	0	0	0	6	19	4	9	0	2	1	2
KDM5A	16	17	17	8	4	4	6	6	16	8	2	4	15	18	16	15
KDM5B	40	45	62	63	6	12	6	11	5	0	3	7	4	23	27	21
KDM6A	0	0	1	0	3	8	8	4	7	2	2	13	14	38	39	40
KDSR	5	3	4	1	0	0	0	0	5	11	0	2	1	1	1	0
KEAP1	9	7	10	9	0	0	0	2	9	17	1	6	1	3	1	1
KHDRBS1	4	21	9	4	0	0	1	1	16	13	3	7	2	2	1	5
KHSRP	19	7	12	4	0	0	0	0	17	13	4	4	0	5	1	2
KIAA0100	2	2	2	2	0	0	0	0	7	15	1	4	3	5	2	2
KIAA0586	0	2	1	2	0	0	1	0	16	18	5	12	14	11	11	9
KIAA1191	2	5	7	3	1	0	0	0	21	19	4	6	4	3	3	3
KIAA1586	35	44	50	32	26	7	27	29	40	17	3	4	8	16	18	8
KIAA2013	16	19	19	7	3	0	0	1	32	34	5	12	4	13	5	1
KIF11	0	5	2	7	1	0	0	0	24	11	8	6	27	20	7	3
KIF18A	6	7	4	5	2	1	2	1	21	19	3	9	5	6	10	23
KIF20B	24	20	34	19	10	6	14	13	282	128	74	68	163	182	158	96
KIF21A	1	2	5	0	0	0	1	0	26	11	7	9	99	29	25	16
KIF22	8	6	9	3	0	0	1	0	15	29	4	6	2	3	4	2
KIF23	24	18	31	6	0	2	0	2	53	19	8	9	6	7	23	7
KIF27	2	3	7	6	0	0	1	1	90	45	22	17	50	40	28	15
KIF2A	4	3	9	6	0	1	0	1	14	12	2	1	2	5	4	3
KIF3A	61	57	62	47	15	6	27	9	191	111	56	53	149	139	145	44
KIF4B	0	1	0	1	0	0	0	0	19	14	7	11	3	6	4	3
KIF5B	41	40	36	29	5	3	11	6	114	137	38	64	85	101	89	69
KIFAP3	7	11	11	8	0	0	1	0	17	18	3	7	2	4	11	15
KIN	4	9	9	3	0	4	6	4	10	9	1	6	13	16	33	15
KLC1	1	2	1	1	0	0	0	0	11	24	5	10	7	19	23	17
KLF10	8	10	5	1	0	0	0	0	2	1	2	5	1	7	2	17
KLF11	0	0	0	0	0	0	0	0	2	1	0	4	5	6	9	11
KLF4	1	0	1	0	39	28	85	69	0	0	1	1	1	2	4	0
KLF6	12	10	5	2	11	5	9	15	13	12	4	12	4	15	29	34
KLHDC2	3	2	3	0	0	0	0	0	21	23	2	9	1	5	2	3
KLHDC3	12	26	11	9	0	0	0	1	8	11	1	0	0	1	6	3
KLHL21	25	30	9	1	0	0	0	0	2	4	1	1	0	0	0	0
KLHL7	16	12	7	5	2	0	0	1	9	4	0	2	0	4	3	3
KMT2C	4	4	4	3	5	10	11	15	4	8	7	5	3	8	4	4
KMT2E	10	12	8	12	14	14	30	22	9	10	5	12	15	42	24	36
KNOP1	2	6	14	9	0	0	0	2	10	6	3	5	1	4	1	4
KNSTRN	2	5	2	2	1	0	0	1	11	6	1	2	1	0	3	2
KPNA2	17	13	33	11	0	0	2	5	37	28	2	9	1	2	18	13
KPNA3	10	21	13	8	0	0	0	0	7	4	1	2	0	1	1	0
KPNA5	0	3	3	1	0	1	1	0	2	0	3	0	13	13	2	1
KPNB1	48	49	91	49	4	4	0	3	229	110	44	29	71	45	39	25
KRCC1	5	3	8	5	1	0	0	0	17	11	0	8	4	3	4	4
KRR1	41	33	66	57	3	3	6	1	13	14	3	4	2	8	7	5
KRT10	10	11	15	1	0	0	0	0	11	18	1	0	1	2	8	9
KRT7	7	3	8	3	2	0	2	0	55	68	15	42	57	49	31	20
KRT80	1	0	0	0	0	0	0	0	8	14	4	5	2	6	4	1
KRT81	3	0	2	1	0	0	0	0	28	44	3	7	0	9	1	1
KRTCAP2	15	26	21	16	1	0	0	0	43	52	8	23	2	17	19	10
KTN1	67	81	110	61	23	6	39	33	282	171	65	85	177	86	54	32
KXD1	10	8	15	11	0	0	1	0	18	32	3	8	0	2	9	10
KYNU	127	128	373	160	55	37	54	57	212	190	32	74	15	49	52	39
L3HYPDH	7	7	24	9	0	0	0	0	25	15	2	4	4	2	2	0
L3MBTL4	32	37	30	37	22	26	38	33	4	1	1	0	0	0	3	0
LACTB	241	411	101	300	30	38	67	65	273	225	47	110	84	180	65	75
LACTB2	0	0	1	2	0	0	0	0	51	24	21	12	33	17	33	10
LAMA4	13	20	21	20	2	2	1	2	36	23	4	15	0	7	4	7
LAMB1	858	678	956	489	47	14	36	15	541	171	149	91	681	186	176	64
LAMB2	15	13	13	6	0	0	0	0	0	3	0	2	0	3	2	2
LAMB4	117	169	132	149	25	30	20	30	0	0	0	0	0	0	0	0
LAMC1	15	17	12	6	2	2	3	4	21	20	5	16	4	19	26	17
LAMP1	2	4	4	0	0	1	0	0	25	35	6	16	2	11	33	61
LAMP2	24	36	27	36	3	1	0	2	11	22	5	11	6	8	8	11
LAMTOR1	51	50	104	55	3	1	4	6	62	99	13	29	12	17	14	25
LAMTOR2	43	63	56	27	2	1	0	0	211	226	30	98	21	54	42	32
LAMTOR4	18	25	28	9	1	0	2	1	16	40	3	3	1	5	3	2
LAMTOR5	31	32	32	16	0	3	2	0	24	31	4	15	2	8	12	14
LANCL1	9	11	7	2	0	0	0	0	22	26	4	7	1	1	5	3
LAP3	11	12	18	14	1	4	4	1	17	16	5	8	1	4	4	4
LAPTM4A	57	58	79	33	4	6	2	0	197	121	35	60	60	58	106	61
LAPTM4B	2	5	4	2	1	0	0	0	49	31	3	14	2	10	8	5
LARP1	5	7	5	1	0	0	0	0	11	12	0	4	1	2	1	2
LARP6	1	4	10	4	0	0	0	0	0	2	0	1	0	0	0	0
LARP7	205	201	143	120	25	9	16	16	494	382	88	143	198	231	136	104
LARS1	15	22	31	20	3	0	2	2	54	49	16	32	13	62	24	28
LAS1L	4	9	5	10	0	0	1	0	14	11	1	3	0	2	2	3
LASP1	8	4	13	6	1	0	0	0	23	17	1	6	0	0	4	5
LAT	0	0	0	0	0	0	2	0	17	17	3	8	4	10	4	6
LATS1	0	0	1	0	0	0	1	1	5	1	4	7	1	6	6	11
LAYN	28	35	46	29	4	0	3	1	225	247	13	37	6	15	13	15
LCMT1	3	10	14	5	1	0	0	0	5	12	3	4	1	2	2	3
LDLRAD3	29	26	16	26	18	9	19	15	1	0	0	0	0	0	0	0
LDOC1	14	13	24	8	1	0	0	0	45	57	7	29	1	15	8	12
LEO1	22	26	23	16	0	1	1	0	30	27	5	13	5	13	16	10
LEPR	27	24	15	15	11	6	6	20	0	2	0	1	0	1	0	3
LEPROT	14	18	38	14	0	0	0	2	58	93	11	29	1	19	8	24
LEPROTL1	43	50	43	38	7	1	18	8	12	22	0	2	1	3	1	2
LETM1	10	18	9	12	2	1	1	2	4	8	1	2	0	3	1	6
LGALS1	139	199	176	101	7	6	6	7	1211	1375	268	666	271	679	434	483
LGALS3	65	71	126	48	7	2	1	5	293	405	44	164	12	42	23	53
LGALS3BP	52	50	55	49	1	2	1	1	12	7	0	5	0	2	2	1
LGALSL	1	0	0	1	0	0	0	0	4	3	0	0	0	2	5	10
LGMN	4	8	8	4	1	0	0	1	24	31	3	22	3	10	6	9
LGR5	0	0	0	0	0	0	0	0	6	4	1	4	0	2	6	12
LHX1	0	1	0	1	0	0	0	0	102	72	11	32	17	26	31	25
LIG1	2	2	3	1	0	0	1	1	10	20	4	4	0	0	2	5
LIG4	2	4	4	4	12	2	19	7	25	18	9	14	27	48	28	25
LIMA1	48	121	30	27	2	3	0	1	6	6	1	2	1	2	0	1
LIMCH1	7	14	13	6	0	0	1	1	17	15	3	5	0	4	2	1
LIMD2	5	5	7	3	0	0	0	0	44	68	7	22	1	4	2	1
LIMS1	6	9	4	2	0	0	2	0	14	21	4	7	4	3	2	5
LIN7C	0	2	1	3	0	0	0	1	12	3	2	3	1	9	8	6
LIPA	2	7	8	3	4	1	6	8	6	1	2	3	0	5	10	22
LIPT1	13	11	14	8	0	0	2	1	1	2	0	0	0	0	1	2
LITAF	19	27	29	10	0	0	1	1	15	22	0	7	1	2	2	12
LLPH	88	111	97	96	7	3	22	15	653	547	88	152	78	117	234	155
LMAN1	11	3	11	4	1	0	1	0	14	24	0	8	2	12	14	15
LMAN2	48	59	69	40	2	2	2	3	159	138	34	75	11	59	40	58
LMBRD1	2	7	7	4	0	0	0	0	9	13	3	4	0	3	1	7
LMF2	12	9	25	5	0	1	0	1	8	14	2	5	0	1	2	1
LMNA	28	41	62	25	2	1	0	1	49	54	6	10	7	15	10	19
LMO4	3	11	6	2	1	0	1	0	18	16	0	2	1	1	2	1
LONP1	9	11	7	2	1	0	1	0	74	81	16	35	29	50	25	22
LONP2	3	3	7	2	0	1	0	0	7	10	3	4	0	5	2	4
LOX	27	27	37	27	5	5	2	4	16	12	6	6	0	6	3	2
LOXL1	5	7	2	7	1	0	0	0	49	51	11	28	10	24	8	3
LOXL2	16	19	48	17	1	0	1	0	2	0	1	0	2	0	0	2
LOXL3	8	10	3	11	0	1	2	1	12	14	1	16	5	7	6	5
LPAR1	5	3	3	1	1	0	2	3	5	14	0	5	0	1	1	2
LPCAT3	18	38	27	16	1	1	0	0	88	88	18	43	20	25	10	9
LPIN2	5	12	3	0	0	0	0	0	1	0	0	0	1	0	0	2
LRFN4	10	4	5	1	0	0	0	0	3	2	0	1	0	1	2	0
LRP1	2	3	3	2	0	0	0	0	9	14	3	1	3	3	0	1
LRP10	2	7	8	2	1	0	0	0	40	35	2	17	1	14	2	1
LRP3	5	4	11	4	1	0	0	0	4	9	2	3	1	10	4	2
LRPAP1	11	13	19	11	2	0	0	0	18	31	5	14	2	10	21	28
LRRC17	0	0	0	0	0	0	0	0	18	19	3	3	0	4	0	1
LRRC24	0	2	0	1	0	0	0	0	9	13	2	3	0	2	0	0
LRRC28	3	2	2	1	0	1	0	0	9	12	2	5	0	3	0	4
LRRC41	10	19	24	22	1	0	0	1	11	8	0	5	1	3	2	4
LRRC42	8	18	18	11	1	1	2	2	21	37	3	2	1	0	6	9
LRRC59	7	17	24	12	0	1	0	0	25	20	1	4	4	4	2	5
LRRC61	0	0	0	0	0	0	0	0	12	10	0	1	1	0	2	0
LRRC75B	2	0	1	0	0	0	0	0	21	18	2	1	2	1	0	3
LRRC8C	4	12	1	2	0	0	0	0	3	2	1	0	0	0	0	1
LRRC8D	5	10	6	11	0	0	0	0	2	6	1	1	0	2	2	1
LRRFIP2	24	24	33	20	12	1	17	2	29	13	4	10	17	17	24	12
LRRIQ1	0	0	0	1	0	0	0	0	17	7	2	3	13	9	5	4
LRRK2	0	0	0	0	0	0	0	0	33	18	11	21	9	29	21	18
LRRN3	1	0	1	0	29	14	21	14	27	22	2	9	0	2	2	2
LRWD1	4	5	7	2	0	0	1	1	11	10	3	10	2	0	1	1
LSM1	5	11	18	6	0	0	0	1	15	16	5	5	3	5	7	5
LSM10	6	8	14	6	0	0	0	0	18	14	4	4	2	1	1	1
LSM12	60	97	64	68	17	13	18	15	9	20	3	4	2	4	2	2
LSM14A	4	19	7	5	3	0	4	6	42	41	2	8	1	6	9	9
LSM2	4	8	18	11	0	0	0	0	38	35	7	14	0	6	6	7
LSM4	19	18	32	18	1	0	1	1	38	82	3	16	3	10	15	13
LSM6	5	3	1	5	0	0	0	0	27	34	3	7	0	2	8	5
LSM7	74	76	67	47	2	0	2	7	30	40	5	14	2	13	7	13
LSM8	18	16	16	17	0	0	0	0	7	6	0	2	1	1	2	0
LTA4H	12	17	9	6	0	0	5	0	11	16	1	5	2	3	3	2
LTBP3	6	6	5	4	1	0	0	4	15	14	3	14	3	8	7	6
LTBP4	0	6	7	4	1	0	0	2	20	7	3	5	2	4	2	6
[truncated: 2,463 more rows]
