# Supplementary material for: Nanopore Assay Reveals Cell-type-dependent Gene Expression of Indiana Vesiculovirus and Differential Host Cell Response
Source: Preprints.org preprint supplement (doi:10.20944/preprints202108.0195.v1), 2021-08-09
Supplement: Supplementary file 6 [file Additional-File-2-Table-S1.docx]

| **Sequencing techniques** | **Host cell reads** | **IVV reads** | **Average length of viral RNAs in bp** | **Average coverage of viral reads** |
| --- | --- | --- | --- | --- |
| MinION (ONT)_VSV_cap_mix | 6,302,618 | 559,408 | 1,004.27 | 50,335.6 |
| MinION (ONT) Glia_dcDNA_mix | 29,888 | 53,305 | 775.42 | 3,703.39 |
| MinION (ONT) Fibroblast_dcDNA_mix | 80,344 | 32,360 | 763.40 | 22,13.39 |
| MinION (ONT) Glia_amplified_cDNA | 3,114,992 | 54,5547 | 781.81 | 4,251.85 |
| MinION (ONT) Fibroblast_ amplified_cDNA | 5,872,662 | 494,827 | 709.90 | 3,067.90 |

**Additional file 2: Table S1. Table 1. Reads and read counts obtained by using different sequencing techniques**
